# Supplementary material for: Widespread and Biologically Driven Sex Disparities in Polygenic Risk Prediction Across Complex Traits
Source: Research Square preprint supplement (doi:10.21203/rs.3.rs-9153854/v1), 2026-04-29
Supplement: Supplementary file 2 [file e7b8058b4fea95d1063aa0b0.pdf]

Supplementary Table 1: Phenotype definitions

Supplementary Table 2: Participant characteristics of the study population

Supplementary Table 3: Score-level Z-test results for sex bias in PGS Catalog scores

Supplementary Table 4: Trait-level Z-test results for sex bias in PGS Catalog traits

Supplementary Table 5: GWAS discovery sample sizes for PGS Catalog scores

Supplementary Table 6: Parameter settings for the seven PRS algorithms

Supplementary Table 7: Z-test results for sex bias across seven PRS algorithms for significantly biased traits in the PGS Catalog

Supplementary Table 8: Intraclass correlation coefficients (ICCs) across seven PRS algorithms

Supplementary Table 9: SNP-based heritability of significantly sex-biased traits in the PGS Catalog

| <b>Trait name</b>            | <b>Phenotype definition</b>                                                                                    | <b>Type</b> |
|------------------------------|----------------------------------------------------------------------------------------------------------------|-------------|
| Hypothyroidism               | 20002: 1226                                                                                                    | Disease     |
| Coronary Artery Disease      | 20002: 1075                                                                                                    | Disease     |
| Cataract                     | 41270: H25,H26.0,H26.2,H26.4,H26.8,H26.9,H28,Q12.0                                                             | Disease     |
| Atrial Fibrillation          | 41270: I48                                                                                                     | Disease     |
| Type 2 Diabetes Mellitus     | 20002: 1223                                                                                                    | Disease     |
| Osteoarthritis               | 20002: 1465                                                                                                    | Disease     |
| Hypertension                 | 41270: I10,I11,I12,I13,I15                                                                                     | Disease     |
| Urinary Bladder Carcinoma    | 41270: C67, D09.0, D41.4                                                                                       | Disease     |
| Dementia                     | 41270: F00,F01,F03,F05.1,G30                                                                                   | Disease     |
| Type 1 Diabetes Mellitus     | 20002: 1222                                                                                                    | Disease     |
| Chronic Kidney Disease       | 20002: 1192                                                                                                    | Disease     |
| Inguinal Hernia              | 41270: K40, K40.0, K40.3, K40.2, K40.4, K40.9, K40.1                                                           | Disease     |
| Venous Thromboembolism       | 20002: 1068                                                                                                    | Disease     |
| Ankylosing Spondylitis       | 41270: M45                                                                                                     | Disease     |
| Asthma                       | 41270: J45,J46                                                                                                 | Disease     |
| Hypercholesterolemia         | 20002: 1473                                                                                                    | Disease     |
| Pulmonary Embolism           | 41270: I26                                                                                                     | Disease     |
| Colorectal Cancer            | 20001: 1020,1022,1023                                                                                          | Disease     |
| Varicose Veins               | 41270: I83,I86                                                                                                 | Disease     |
| Melanoma                     | 41270: C43                                                                                                     | Disease     |
| Insomnia                     | 41270: F51.0, F51.5                                                                                            | Disease     |
| Multiple Myeloma             | 41270: C88.2, C88, C88.1, C90.0, C88.9, C90.2, C88.3                                                           | Disease     |
| Psoriasis                    | 41270: L40,M07.0,M07.1,M07.2,M07.3,M09.0                                                                       | Disease     |
| Sleep Apnea                  | 20002: 1123                                                                                                    | Disease     |
| Glaucoma                     | 41270: H40.1,H40.2,H40.9                                                                                       | Disease     |
| Diabetic Retinopathy         | 41270: E11.3,H36.0,H28.0                                                                                       | Disease     |
| Alzheimer's Disease          | 20002: 1263                                                                                                    | Disease     |
| Crohn's Disease              | 40001: K50,K50.0,K50.1,K50.8,K50.9                                                                             | Disease     |
| Diverticular Disease         | 20002: 1458                                                                                                    | Disease     |
| Migraine Disorder            | 41270: G43                                                                                                     | Disease     |
| Stroke                       | 41202: I60-I64                                                                                                 | Disease     |
| Spondylosis                  | 41270: M47.1,M47.2,M47.8,M47.9                                                                                 | Disease     |
| Inflammatory Bowel Disease   | 20002: 1461,1462,1463                                                                                          | Disease     |
| Gout                         | 41270: M10,M14.0                                                                                               | Disease     |
| Heart Failure                | 41270: I11.0,I13.0,I13.2,I50                                                                                   | Disease     |
| Abdominal Aortic Aneurysm    | 41270: I71.4,I71.6,I71.9                                                                                       | Disease     |
| Bipolar Disorder             | 41270: F30,F31.9,F30.8,F31.6,F31.8,F31.3,F31.1,F31.4,F31.7,F30.0,F31.0,F30.2,F31.5,F30.1,F31.2,F30.9,F32.8,F31 | Disease     |
| Vitiligo                     | 41270: L80                                                                                                     | Disease     |
| Systemic Lupus Erythematosus | 41270: M32.9, M32.8, M32.1, M32.0, M32                                                                         | Disease     |
| Non-Hodgkin's Lymphoma       | 41270: C91.1                                                                                                   | Disease     |
| Colon Carcinoma              | 41270: C18.4,C26.0,C18.0,C18.8,C18.9,C18,C18.3,C18.6,C18.5,C18.1,C18.7,D01.0,C18.2                             | Disease     |
| Chronic Lymphocytic Leukemia | 41270: C91.1                                                                                                   | Disease     |
| Brain Cancer                 | 41270: C71                                                                                                     | Disease     |

|                                                  |                                                               |         |
|--------------------------------------------------|---------------------------------------------------------------|---------|
| Renal Carcinoma                                  | 41270: C64                                                    | Disease |
| Schizophrenia                                    | 20002: 1289                                                   | Disease |
| Ulcerative Colitis                               | 41270: K51                                                    | Disease |
| Gastroesophageal Reflux Disease                  | 20002: 1138                                                   | Disease |
| Multiple Sclerosis                               | 41270: G35                                                    | Disease |
| Lung Carcinoma                                   | 20001: 1001,1027,1028                                         | Disease |
| Non-Alcoholic Fatty Liver Disease                | 41270: K75.81,K76.0,K76.9                                     | Disease |
| Osteoporosis                                     | 41270: M80,M81,M82                                            | Disease |
| Chronic Obstructive Pulmonary Disease            | 6152: 6                                                       | Disease |
| Eczema                                           | 41270: L20                                                    | Disease |
| Obesity                                          | 41270: E66                                                    | Disease |
| Pancreatic Carcinoma                             | 41270: C25.0, C25.1, C25.2, C25.3, C25.4, C25.7, C25.8, C25.9 | Disease |
| Skin Carcinoma                                   | 20001: 1003,1059,1060,1061,1062                               | Disease |
| Esophageal Cancer                                | 41270: C15                                                    | Disease |
| Cholecystitis                                    | 41270: K80.0,K80.1,K80.4,K81                                  | Disease |
| Celiac Disease                                   | 41270: K90.0, K90.1                                           | Disease |
| Age-Related Macular Degeneration                 | 41270: H35.3                                                  | Disease |
| Parkinson's Disease                              | 20002: 1262                                                   | Disease |
| Rheumatoid Arthritis                             | 41270: J99.0,M05,M06                                          | Disease |
| Thyroid Carcinoma                                | 41270: C73-C75.9,C73                                          | Disease |
| Hodgkin's Lymphoma                               | 41270: C81                                                    | Disease |
| Testosterone Measurement                         | 30850                                                         | QT      |
| Estradiol Measurement                            | 30800                                                         | QT      |
| Monocyte Count                                   | 30130                                                         | QT      |
| Grip Strength Measurement                        | 46                                                            | QT      |
| Basal Metabolic Rate Measurement                 | 23105                                                         | QT      |
| Forced Expiratory Volume                         | 3063                                                          | QT      |
| Creatinine Measurement                           | 30700                                                         | QT      |
| Triglyceride Measurement                         | 30870                                                         | QT      |
| Glomerular Filtration Rate                       | 30700                                                         | QT      |
| Waist Hip Ratio                                  | 48,49                                                         | QT      |
| Urate Measurement                                | 30880                                                         | QT      |
| Peak Expiratory Flow                             | 3064                                                          | QT      |
| C-Reactive Protein Measurement                   | 30710                                                         | QT      |
| Leukocyte Count                                  | 30000                                                         | QT      |
| Whole-Body Water Mass                            | 23102                                                         | QT      |
| Alkaline Phosphatase Measurement                 | 30610                                                         | QT      |
| HbA1c Measurement                                | 30750                                                         | QT      |
| High-Density Lipoprotein Cholesterol Measurement | 30760                                                         | QT      |
| Apolipoprotein B Measurement                     | 23439                                                         | QT      |
| Urinary Microalbumin Measurement                 | 30500                                                         | QT      |
| Eosinophil Count                                 | 30150                                                         | QT      |
| Glucose Measurement                              | 23470                                                         | QT      |
| Lymphocyte Count                                 | 30120                                                         | QT      |

|                                                 |              |    |
|-------------------------------------------------|--------------|----|
| Serum Alanine Aminotransferase Measurement      | 30620        | QT |
| Lymphocyte Percentage of Leukocytes             | 30180        | QT |
| Apolipoprotein A1 Measurement                   | 23440        | QT |
| Phosphate Measurement                           | 30810        | QT |
| Platelet Count                                  | 30080        | QT |
| Mean Corpuscular Hemoglobin Concentration       | 30060        | QT |
| Serum Gamma-Glutamyl Transferase Measurement    | 30730        | QT |
| Liver Fat Measurement                           | 21088        | QT |
| Bone Density                                    | 3148         | QT |
| Diastolic Blood Pressure                        | 4079         | QT |
| Birth Weight                                    | 20022        | QT |
| Urinary Potassium Measurement                   | 30520        | QT |
| Low-Density Lipoprotein Cholesterol Measurement | 30780        | QT |
| Serum Albumin Measurement                       | 30600        | QT |
| Neutrophil Count                                | 30140        | QT |
| Fat Body Mass                                   | 23099        | QT |
| IGF-1 Measurement                               | 30770        | QT |
| Urea Measurement                                | 30670        | QT |
| Body Height                                     | 50           | QT |
| Basophil Count                                  | 30160        | QT |
| Calcium Measurement                             | 30680        | QT |
| Erythrocyte Count                               | 30010        | QT |
| Mean Corpuscular Volume                         | 30040        | QT |
| Red Cell Distribution Width                     | 30070        | QT |
| Bilirubin Measurement                           | 30660        | QT |
| Systolic Blood Pressure                         | 4080         | QT |
| Adipose Tissue Measurement                      | 22415        | QT |
| Lipoprotein(a) Measurement                      | 30790        | QT |
| Body Weight                                     | 21002        | QT |
| Eosinophil Percentage of Leukocytes             | 30210        | QT |
| Basophil Percentage of Leukocytes               | 30220        | QT |
| Platelet Component Distribution Width           | 30110        | QT |
| Smoking Status Measurement                      | 20116        | QT |
| Alcohol Consumption Measurement                 | 26030        | QT |
| Mean Reticulocyte Volume                        | 30260        | QT |
| PR Interval                                     | 22330        | QT |
| QT Interval                                     | 22331        | QT |
| Neutrophil Percentage of Leukocytes             | 30200        | QT |
| Platelet Crit                                   | 30090        | QT |
| Reticulocyte Count                              | 30250        | QT |
| Vitamin B12 Measurement                         | 100013       | QT |
| Immature Reticulocyte Fraction Measurement      | 30280        | QT |
| Monocyte Percentage of Leukocytes               | 30190        | QT |
| Hippocampal Volume                              | 26641, 26663 | QT |

|                                                |       |    |
|------------------------------------------------|-------|----|
| Intraocular Pressure Measurement               | 5262  | QT |
| QRS Duration                                   | 12340 | QT |
| Total Cholesterol Measurement                  | 23400 | QT |
| Body Mass Index                                | 21001 | QT |
| Vitamin D Measurement                          | 30890 | QT |
| Brain Volume Measurement (Neuroimaging)        | 25010 | QT |
| Mean Platelet Volume                           | 30100 | QT |
| Left Ventricular Ejection Fraction Measurement | 31060 | QT |
| Total Blood Protein Measurement                | 30860 | QT |
| Reticulocyte Measurement                       | 30250 | QT |
| Cystatin C Measurement                         | 30720 | QT |
| Mean Corpuscular Hemoglobin                    | 30050 | QT |
| Aspartate Aminotransferase Measurement         | 30650 | QT |
| Red Blood Cell Distribution Width              | 30070 | QT |

| <b>Trait name</b>         | <b>Type</b> | <b>Category</b> | <b>Total (N=409440)</b> | <b>Female (N=221356)</b> | <b>Male (N=188084)</b> |
|---------------------------|-------------|-----------------|-------------------------|--------------------------|------------------------|
| Hypothyroidism            | Disease     | Control         | 377545 (92.2)           | 377545 (92.2)            | 377545 (92.2)          |
| Hypothyroidism            | Disease     | Case            | 31895 (7.8)             | 31895 (7.8)              | 31895 (7.8)            |
| Coronary Artery Disease   | Disease     | Control         | 360936 (88.2)           | 360936 (88.2)            | 360936 (88.2)          |
| Coronary Artery Disease   | Disease     | Case            | 48504 (11.8)            | 48504 (11.8)             | 48504 (11.8)           |
| Cataract                  | Disease     | Control         | 351594 (85.9)           | 351594 (85.9)            | 351594 (85.9)          |
| Cataract                  | Disease     | Case            | 57846 (14.1)            | 57846 (14.1)             | 57846 (14.1)           |
| Atrial Fibrillation       | Disease     | Control         | 374190 (91.4)           | 374190 (91.4)            | 374190 (91.4)          |
| Atrial Fibrillation       | Disease     | Case            | 35250 (8.6)             | 35250 (8.6)              | 35250 (8.6)            |
| Type 2 Diabetes Mellitus  | Disease     | Control         | 374876 (91.6)           | 374876 (91.6)            | 374876 (91.6)          |
| Type 2 Diabetes Mellitus  | Disease     | Case            | 34564 (8.4)             | 34564 (8.4)              | 34564 (8.4)            |
| Osteoarthritis            | Disease     | Control         | 391161 (95.5)           | 206438 (93.3)            | 184723 (98.2)          |
| Osteoarthritis            | Disease     | Case            | 18279 (4.5)             | 14918 (6.7)              | 3361 (1.8)             |
| Hypertension              | Disease     | Control         | 276997 (67.7)           | 276997 (67.7)            | 276997 (67.7)          |
| Hypertension              | Disease     | Case            | 132443 (32.3)           | 132443 (32.3)            | 132443 (32.3)          |
| Urinary Bladder Carcinoma | Disease     | Control         | 404891 (98.9)           | 404891 (98.9)            | 404891 (98.9)          |
| Urinary Bladder Carcinoma | Disease     | Case            | 4549 (1.1)              | 4549 (1.1)               | 4549 (1.1)             |
| Dementia                  | Disease     | Control         | 402365 (98.3)           | 402365 (98.3)            | 402365 (98.3)          |
| Dementia                  | Disease     | Case            | 7075 (1.7)              | 7075 (1.7)               | 7075 (1.7)             |
| Type 1 Diabetes Mellitus  | Disease     | Control         | 405356 (99.0)           | 405356 (99.0)            | 405356 (99.0)          |
| Type 1 Diabetes Mellitus  | Disease     | Case            | 4084 (1.0)              | 4084 (1.0)               | 4084 (1.0)             |
| Chronic Kidney Disease    | Disease     | Control         | 387940 (94.7)           | 387940 (94.7)            | 387940 (94.7)          |
| Chronic Kidney Disease    | Disease     | Case            | 21500 (5.3)             | 21500 (5.3)              | 21500 (5.3)            |
| Inguinal Hernia           | Disease     | Control         | 385883 (94.2)           | 385883 (94.2)            | 385883 (94.2)          |
| Inguinal Hernia           | Disease     | Case            | 23557 (5.8)             | 23557 (5.8)              | 23557 (5.8)            |
| Venous Thromboembolism    | Disease     | Control         | 391953 (95.7)           | 391953 (95.7)            | 391953 (95.7)          |
| Venous Thromboembolism    | Disease     | Case            | 17487 (4.3)             | 17487 (4.3)              | 17487 (4.3)            |
| Ankylosing Spondylitis    | Disease     | Control         | 408351 (99.7)           | 408351 (99.7)            | 408351 (99.7)          |
| Ankylosing Spondylitis    | Disease     | Case            | 1089 (0.3)              | 1089 (0.3)               | 1089 (0.3)             |
| Asthma                    | Disease     | Control         | 369087 (90.1)           | 369087 (90.1)            | 369087 (90.1)          |
| Asthma                    | Disease     | Case            | 40353 (9.9)             | 40353 (9.9)              | 40353 (9.9)            |
| Hypercholesterolemia      | Disease     | Control         | 309765 (75.7)           | 309765 (75.7)            | 309765 (75.7)          |
| Hypercholesterolemia      | Disease     | Case            | 99675 (24.3)            | 99675 (24.3)             | 99675 (24.3)           |
| Pulmonary Embolism        | Disease     | Control         | 400957 (97.9)           | 400957 (97.9)            | 400957 (97.9)          |
| Pulmonary Embolism        | Disease     | Case            | 8483 (2.1)              | 8483 (2.1)               | 8483 (2.1)             |
| Colorectal Cancer         | Disease     | Control         | 402194 (98.2)           | 402194 (98.2)            | 402194 (98.2)          |
| Colorectal Cancer         | Disease     | Case            | 7246 (1.8)              | 7246 (1.8)               | 7246 (1.8)             |
| Varicose Veins            | Disease     | Control         | 393995 (96.2)           | 393995 (96.2)            | 393995 (96.2)          |
| Varicose Veins            | Disease     | Case            | 15445 (3.8)             | 15445 (3.8)              | 15445 (3.8)            |
| Melanoma                  | Disease     | Control         | 404111 (98.7)           | 404111 (98.7)            | 404111 (98.7)          |
| Melanoma                  | Disease     | Case            | 5329 (1.3)              | 5329 (1.3)               | 5329 (1.3)             |
| Insomnia                  | Disease     | Control         | 399140 (97.5)           | 399140 (97.5)            | 399140 (97.5)          |
| Insomnia                  | Disease     | Case            | 10300 (2.5)             | 10300 (2.5)              | 10300 (2.5)            |
| Multiple Myeloma          | Disease     | Control         | 407844 (99.6)           | 407844 (99.6)            | 407844 (99.6)          |
| Multiple Myeloma          | Disease     | Case            | 1596 (0.4)              | 1596 (0.4)               | 1596 (0.4)             |
| Psoriasis                 | Disease     | Control         | 404361 (98.8)           | 404361 (98.8)            | 404361 (98.8)          |
| Psoriasis                 | Disease     | Case            | 5079 (1.2)              | 5079 (1.2)               | 5079 (1.2)             |

|                                 |         |         |                |                |                |
|---------------------------------|---------|---------|----------------|----------------|----------------|
| Sleep Apnea                     | Disease | Control | 400140 (97.7)  | 400140 (97.7)  | 400140 (97.7)  |
| Sleep Apnea                     | Disease | Case    | 9300 (2.3)     | 9300 (2.3)     | 9300 (2.3)     |
| Glaucoma                        | Disease | Control | 398337 (97.3)  | 398337 (97.3)  | 398337 (97.3)  |
| Glaucoma                        | Disease | Case    | 11103 (2.7)    | 11103 (2.7)    | 11103 (2.7)    |
| Diabetic Retinopathy            | Disease | Control | 405452 (99.0)  | 405452 (99.0)  | 405452 (99.0)  |
| Diabetic Retinopathy            | Disease | Case    | 3988 (1.0)     | 3988 (1.0)     | 3988 (1.0)     |
| Alzheimer's Disease             | Disease | Control | 406583 (99.3)  | 219879 (99.3)  | 186704 (99.3)  |
| Alzheimer's Disease             | Disease | Case    | 2857 (0.7)     | 1477 (0.7)     | 1380 (0.7)     |
| Crohn's Disease                 | Disease | Control | 406864 (99.4)  | 406864 (99.4)  | 406864 (99.4)  |
| Crohn's Disease                 | Disease | Case    | 2576 (0.6)     | 2576 (0.6)     | 2576 (0.6)     |
| Diverticular Disease            | Disease | Control | 348962 (85.2)  | 348962 (85.2)  | 348962 (85.2)  |
| Diverticular Disease            | Disease | Case    | 60478 (14.8)   | 60478 (14.8)   | 60478 (14.8)   |
| Migraine Disorder               | Disease | Control | 402874 (98.4)  | 402874 (98.4)  | 402874 (98.4)  |
| Migraine Disorder               | Disease | Case    | 6566 (1.6)     | 6566 (1.6)     | 6566 (1.6)     |
| Stroke                          | Disease | Control | 396488 (96.8)  | 396488 (96.8)  | 396488 (96.8)  |
| Stroke                          | Disease | Case    | 12952 (3.2)    | 12952 (3.2)    | 12952 (3.2)    |
| Spondylosis                     | Disease | Control | 390725 (95.4)  | 390725 (95.4)  | 390725 (95.4)  |
| Spondylosis                     | Disease | Case    | 18715 (4.6)    | 18715 (4.6)    | 18715 (4.6)    |
| Inflammatory Bowel Disease      | Disease | Control | 402221 (98.2)  | 402221 (98.2)  | 402221 (98.2)  |
| Inflammatory Bowel Disease      | Disease | Case    | 7219 (1.8)     | 7219 (1.8)     | 7219 (1.8)     |
| Gout                            | Disease | Control | 400065 (97.7)  | 400065 (97.7)  | 400065 (97.7)  |
| Gout                            | Disease | Case    | 9375 (2.3)     | 9375 (2.3)     | 9375 (2.3)     |
| Heart Failure                   | Disease | Control | 392752 (95.9)  | 392752 (95.9)  | 392752 (95.9)  |
| Heart Failure                   | Disease | Case    | 16688 (4.1)    | 16688 (4.1)    | 16688 (4.1)    |
| Abdominal Aortic Aneurysm       | Disease | Control | 406419 (99.3)  | 406419 (99.3)  | 406419 (99.3)  |
| Abdominal Aortic Aneurysm       | Disease | Case    | 3021 (0.7)     | 3021 (0.7)     | 3021 (0.7)     |
| Bipolar Disorder                | Disease | Control | 407697 (99.6)  | 220357 (99.5)  | 187340 (99.6)  |
| Bipolar Disorder                | Disease | Case    | 1743 (0.4)     | 999 (0.5)      | 744 (0.4)      |
| Vitiligo                        | Disease | Control | 409268 (100.0) | 409268 (100.0) | 409268 (100.0) |
| Vitiligo                        | Disease | Case    | 172 (0.0)      | 172 (0.0)      | 172 (0.0)      |
| Systemic Lupus Erythematosus    | Disease | Control | 408869 (99.9)  | 408869 (99.9)  | 408869 (99.9)  |
| Systemic Lupus Erythematosus    | Disease | Case    | 571 (0.1)      | 571 (0.1)      | 571 (0.1)      |
| Non-Hodgkin's Lymphoma          | Disease | Control | 408379 (99.7)  | 408379 (99.7)  | 408379 (99.7)  |
| Non-Hodgkin's Lymphoma          | Disease | Case    | 1061 (0.3)     | 1061 (0.3)     | 1061 (0.3)     |
| Colon Carcinoma                 | Disease | Control | 403278 (98.5)  | 403278 (98.5)  | 403278 (98.5)  |
| Colon Carcinoma                 | Disease | Case    | 6162 (1.5)     | 6162 (1.5)     | 6162 (1.5)     |
| Chronic Lymphocytic Leukemia    | Disease | Control | 408379 (99.7)  | 408379 (99.7)  | 408379 (99.7)  |
| Chronic Lymphocytic Leukemia    | Disease | Case    | 1061 (0.3)     | 1061 (0.3)     | 1061 (0.3)     |
| Brain Cancer                    | Disease | Control | 408447 (99.8)  | 408447 (99.8)  | 408447 (99.8)  |
| Brain Cancer                    | Disease | Case    | 993 (0.2)      | 993 (0.2)      | 993 (0.2)      |
| Renal Carcinoma                 | Disease | Control | 407342 (99.5)  | 407342 (99.5)  | 407342 (99.5)  |
| Renal Carcinoma                 | Disease | Case    | 2098 (0.5)     | 2098 (0.5)     | 2098 (0.5)     |
| Schizophrenia                   | Disease | Control | 408500 (99.8)  | 408500 (99.8)  | 408500 (99.8)  |
| Schizophrenia                   | Disease | Case    | 940 (0.2)      | 940 (0.2)      | 940 (0.2)      |
| Ulcerative Colitis              | Disease | Control | 404840 (98.9)  | 404840 (98.9)  | 404840 (98.9)  |
| Ulcerative Colitis              | Disease | Case    | 4600 (1.1)     | 4600 (1.1)     | 4600 (1.1)     |
| Gastroesophageal Reflux Disease | Disease | Control | 346580 (84.6)  | 187033 (84.5)  | 159547 (84.8)  |

|                                       |         |         |                        |                        |                        |
|---------------------------------------|---------|---------|------------------------|------------------------|------------------------|
| Gastroesophageal Reflux Disease       | Disease | Case    | 62860 (15.4)           | 34323 (15.5)           | 28537 (15.2)           |
| Multiple Sclerosis                    | Disease | Control | 407610 (99.6)          | 407610 (99.6)          | 407610 (99.6)          |
| Multiple Sclerosis                    | Disease | Case    | 1830 (0.4)             | 1830 (0.4)             | 1830 (0.4)             |
| Lung Carcinoma                        | Disease | Control | 403791 (98.6)          | 403791 (98.6)          | 403791 (98.6)          |
| Lung Carcinoma                        | Disease | Case    | 5649 (1.4)             | 5649 (1.4)             | 5649 (1.4)             |
| Non-Alcoholic Fatty Liver Disease     | Disease | Control | 401674 (98.1)          | 401674 (98.1)          | 401674 (98.1)          |
| Non-Alcoholic Fatty Liver Disease     | Disease | Case    | 7766 (1.9)             | 7766 (1.9)             | 7766 (1.9)             |
| Osteoporosis                          | Disease | Control | 391161 (95.5)          | 391161 (95.5)          | 391161 (95.5)          |
| Osteoporosis                          | Disease | Case    | 18279 (4.5)            | 18279 (4.5)            | 18279 (4.5)            |
| Chronic Obstructive Pulmonary Disease | Disease | Control | 384281 (93.9)          | 384281 (93.9)          | 384281 (93.9)          |
| Chronic Obstructive Pulmonary Disease | Disease | Case    | 25159 (6.1)            | 25159 (6.1)            | 25159 (6.1)            |
| Eczema                                | Disease | Control | 409221 (99.9)          | 221257 (100.0)         | 187964 (99.9)          |
| Eczema                                | Disease | Case    | 219 (0.1)              | 99 (0.0)               | 120 (0.1)              |
| Obesity                               | Disease | Control | 376858 (92.0)          | 376858 (92.0)          | 376858 (92.0)          |
| Obesity                               | Disease | Case    | 32582 (8.0)            | 32582 (8.0)            | 32582 (8.0)            |
| Pancreatic Carcinoma                  | Disease | Control | 407760 (99.6)          | 407760 (99.6)          | 407760 (99.6)          |
| Pancreatic Carcinoma                  | Disease | Case    | 1680 (0.4)             | 1680 (0.4)             | 1680 (0.4)             |
| Skin Carcinoma                        | Disease | Control | 377328 (92.2)          | 377328 (92.2)          | 377328 (92.2)          |
| Skin Carcinoma                        | Disease | Case    | 32112 (7.8)            | 32112 (7.8)            | 32112 (7.8)            |
| Esophageal Cancer                     | Disease | Control | 407726 (99.6)          | 407726 (99.6)          | 407726 (99.6)          |
| Esophageal Cancer                     | Disease | Case    | 1714 (0.4)             | 1714 (0.4)             | 1714 (0.4)             |
| Cholecystitis                         | Disease | Control | 395107 (96.5)          | 395107 (96.5)          | 395107 (96.5)          |
| Cholecystitis                         | Disease | Case    | 14333 (3.5)            | 14333 (3.5)            | 14333 (3.5)            |
| Celiac Disease                        | Disease | Control | 406451 (99.3)          | 406451 (99.3)          | 406451 (99.3)          |
| Celiac Disease                        | Disease | Case    | 2989 (0.7)             | 2989 (0.7)             | 2989 (0.7)             |
| Age-Related Macular Degeneration      | Disease | Control | 400198 (97.7)          | 215715 (97.5)          | 184483 (98.1)          |
| Age-Related Macular Degeneration      | Disease | Case    | 9242 (2.3)             | 5641 (2.5)             | 3601 (1.9)             |
| Parkinson's Disease                   | Disease | Control | 405688 (99.1)          | 405688 (99.1)          | 405688 (99.1)          |
| Parkinson's Disease                   | Disease | Case    | 3752 (0.9)             | 3752 (0.9)             | 3752 (0.9)             |
| Rheumatoid Arthritis                  | Disease | Control | 400867 (97.9)          | 400867 (97.9)          | 400867 (97.9)          |
| Rheumatoid Arthritis                  | Disease | Case    | 8573 (2.1)             | 8573 (2.1)             | 8573 (2.1)             |
| Thyroid Carcinoma                     | Disease | Control | 408855 (99.9)          | 408855 (99.9)          | 408855 (99.9)          |
| Thyroid Carcinoma                     | Disease | Case    | 585 (0.1)              | 585 (0.1)              | 585 (0.1)              |
| Hodgkin's Lymphoma                    | Disease | Control | 409034 (99.9)          | 409034 (99.9)          | 409034 (99.9)          |
| Hodgkin's Lymphoma                    | Disease | Case    | 406 (0.1)              | 406 (0.1)              | 406 (0.1)              |
| Age at recruitment                    | QT      | All     | 58.0 [51.0,63.0]       | 58.0 [51.0,63.0]       | 59.0 [51.0,64.0]       |
| Testosterone Measurement              | QT      | All     | 4.5 [1.0,11.6]         | 1.0 [0.7,1.4]          | 11.6 [9.4,14.1]        |
| Estradiol Measurement                 | QT      | All     | 312.4 [215.6,531.8]    | 394.9 [263.4,630.7]    | 204.0 [188.9,231.4]    |
| Monocyte Count                        | QT      | All     | 0.5 [0.4,0.6]          | 0.4 [0.3,0.5]          | 0.5 [0.4,0.6]          |
| Grip Strength Measurement             | QT      | All     | 28.0 [21.0,38.0]       | 22.0 [18.0,26.0]       | 38.0 [32.0,44.0]       |
| Basal Metabolic Rate Measurement      | QT      | All     | 6376.0 [5498.0,7627.0] | 5556.0 [5197.0,5996.0] | 7699.0 [7088.0,8393.0] |
| Forced Expiratory Volume              | QT      | All     | 2.8 [2.3,3.3]          | 2.4 [2.1,2.8]          | 3.3 [2.9,3.8]          |
| Creatinine Measurement                | QT      | All     | 70.5 [61.5,80.9]       | 63.2 [57.1,70.0]       | 80.0 [72.6,88.3]       |
| Triglyceride Measurement              | QT      | All     | 1.5 [1.1,2.2]          | 1.3 [1.0,1.9]          | 1.7 [1.2,2.5]          |
| Glomerular Filtration Rate            | QT      | All     | 70.5 [61.5,80.9]       | 63.2 [57.1,70.0]       | 80.0 [72.6,88.3]       |
| Waist Hip Ratio                       | QT      | All     | 0.9 [0.8,0.9]          | 0.8 [0.8,0.9]          | 0.9 [0.9,1.0]          |
| Urate Measurement                     | QT      | All     | 303.1 [250.6,361.0]    | 264.0 [225.1,309.3]    | 349.7 [305.2,398.9]    |

|                                                  |    |     |                     |                     |                     |
|--------------------------------------------------|----|-----|---------------------|---------------------|---------------------|
| Peak Expiratory Flow                             | QT | All | 381.0 [307.0,477.0] | 333.0 [277.0,385.0] | 479.0 [395.0,556.0] |
| C-Reactive Protein Measurement                   | QT | All | 1.3 [0.7,2.8]       | 1.4 [0.7,3.0]       | 1.3 [0.7,2.5]       |
| Leukocyte Count                                  | QT | All | 6.7 [5.7,7.8]       | 6.6 [5.6,7.8]       | 6.7 [5.7,7.9]       |
| Whole-Body Water Mass                            | QT | All | 37.2 [31.9,45.8]    | 32.2 [30.1,34.6]    | 46.3 [42.8,50.1]    |
| Alkaline Phosphatase Measurement                 | QT | All | 80.5 [67.4,95.9]    | 82.0 [67.7,98.4]    | 78.9 [67.1,93.0]    |
| HbA1c Measurement                                | QT | All | 35.2 [32.7,37.8]    | 35.1 [32.7,37.6]    | 35.2 [32.7,38.0]    |
| High-Density Lipoprotein Cholesterol Measurement | QT | All | 1.4 [1.2,1.7]       | 1.6 [1.3,1.8]       | 1.2 [1.1,1.5]       |
| Apolipoprotein B Measurement                     | QT | All | 0.8 [0.7,1.0]       | 0.8 [0.7,1.0]       | 0.8 [0.7,1.0]       |
| Urinary Microalbumin Measurement                 | QT | All | 11.4 [8.4,19.1]     | 11.0 [8.3,17.4]     | 11.8 [8.5,21.0]     |
| Eosinophil Count                                 | QT | All | 0.1 [0.1,0.2]       | 0.1 [0.1,0.2]       | 0.2 [0.1,0.2]       |
| Glucose Measurement                              | QT | All | 3.6 [3.1,4.0]       | 3.6 [3.1,4.0]       | 3.5 [3.1,4.0]       |
| Lymphocyte Count                                 | QT | All | 1.9 [1.5,2.3]       | 1.9 [1.6,2.3]       | 1.8 [1.5,2.2]       |
| Serum Alanine Aminotransferase Measurement       | QT | All | 20.2 [15.4,27.4]    | 17.5 [13.9,23.0]    | 23.8 [18.4,31.8]    |
| Lymphocyte Percentage of Leukocytes              | QT | All | 28.4 [23.7,33.2]    | 29.3 [24.7,34.1]    | 27.2 [22.7,32.0]    |
| Apolipoprotein A1 Measurement                    | QT | All | 1.4 [1.3,1.6]       | 1.5 [1.4,1.7]       | 1.3 [1.2,1.5]       |
| Phosphate Measurement                            | QT | All | 1.2 [1.1,1.3]       | 1.2 [1.1,1.3]       | 1.1 [1.0,1.2]       |
| Platelet Count                                   | QT | All | 248.3 [213.9,287.3] | 261.1 [226.4,300.7] | 234.0 [202.0,269.3] |
| Mean Corpuscular Hemoglobin Concentration        | QT | All | 34.5 [33.9,35.1]    | 34.4 [33.8,35.0]    | 34.6 [34.0,35.2]    |
| Serum Gamma-Glutamyl Transferase Measurement     | QT | All | 26.3 [18.5,41.0]    | 21.4 [16.1,31.9]    | 33.1 [23.7,50.2]    |
| Liver Fat Measurement                            | QT | All | 3.0 [2.1,5.3]       | 2.5 [1.9,4.2]       | 3.6 [2.5,6.5]       |
| Bone Density                                     | QT | All | 0.5 [0.5,0.6]       | 0.5 [0.4,0.6]       | 0.6 [0.5,0.6]       |
| Diastolic Blood Pressure                         | QT | All | 82.0 [75.0,89.0]    | 80.0 [73.0,87.0]    | 84.0 [77.0,91.0]    |
| Birth Weight                                     | QT | All | 3.4 [3.0,3.7]       | 3.2 [2.9,3.6]       | 3.4 [3.2,3.8]       |
| Urinary Potassium Measurement                    | QT | All | 57.2 [37.3,83.4]    | 51.8 [33.8,77.7]    | 63.4 [42.4,88.9]    |
| Low-Density Lipoprotein Cholesterol Measurement  | QT | All | 3.5 [3.0,4.1]       | 3.6 [3.0,4.2]       | 3.5 [2.9,4.1]       |
| Serum Albumin Measurement                        | QT | All | 45.2 [43.5,46.9]    | 45.0 [43.3,46.7]    | 45.5 [43.8,47.2]    |
| Neutrophil Count                                 | QT | All | 4.0 [3.3,5.0]       | 4.0 [3.3,4.9]       | 4.1 [3.3,5.0]       |
| Fat Body Mass                                    | QT | All | 31.1 [25.2,37.7]    | 36.8 [32.1,41.4]    | 25.4 [21.6,29.1]    |
| IGF-1 Measurement                                | QT | All | 21.2 [17.5,24.8]    | 20.7 [16.9,24.4]    | 21.8 [18.3,25.2]    |
| Urea Measurement                                 | QT | All | 5.3 [4.5,6.2]       | 5.1 [4.4,6.0]       | 5.5 [4.7,6.4]       |
| Body Height                                      | QT | All | 168.0 [162.0,175.0] | 163.0 [158.0,167.0] | 176.0 [171.0,180.0] |
| Basophil Count                                   | QT | All | 0.0 [0.0,0.0]       | 0.0 [0.0,0.1]       | 0.0 [0.0,0.0]       |
| Calcium Measurement                              | QT | All | 2.4 [2.3,2.4]       | 2.4 [2.3,2.4]       | 2.4 [2.3,2.4]       |
| Erythrocyte Count                                | QT | All | 4.5 [4.2,4.8]       | 4.3 [4.1,4.5]       | 4.7 [4.5,5.0]       |
| Mean Corpuscular Volume                          | QT | All | 91.3 [88.7,94.0]    | 91.2 [88.5,93.8]    | 91.5 [89.0,94.2]    |
| Red Cell Distribution Width                      | QT | All | 13.3 [12.9,13.8]    | 13.3 [12.9,13.9]    | 13.3 [12.9,13.8]    |
| Bilirubin Measurement                            | QT | All | 1.6 [1.3,2.1]       | 1.5 [1.2,1.8]       | 1.8 [1.4,2.3]       |
| Systolic Blood Pressure                          | QT | All | 139.0 [126.0,152.0] | 136.0 [123.0,150.0] | 142.0 [130.0,155.0] |
| Adipose Tissue Measurement                       | QT | All | 20.0 [16.0,25.0]    | 20.9 [16.7,26.2]    | 18.9 [15.3,23.5]    |
| Lipoprotein(a) Measurement                       | QT | All | 20.1 [9.3,60.2]     | 21.2 [9.7,60.1]     | 18.9 [9.0,60.3]     |
| Body Weight                                      | QT | All | 76.7 [66.7,87.8]    | 69.2 [61.9,78.6]    | 84.6 [76.5,94.0]    |
| Eosinophil Percentage of Leukocytes              | QT | All | 2.1 [1.4,3.2]       | 2.0 [1.3,3.0]       | 2.3 [1.5,3.5]       |
| Basophil Percentage of Leukocytes                | QT | All | 0.4 [0.3,0.7]       | 0.4 [0.3,0.7]       | 0.4 [0.3,0.6]       |
| Platelet Component Distribution Width            | QT | All | 16.4 [16.1,16.8]    | 16.4 [16.1,16.7]    | 16.5 [16.2,16.9]    |
| Smoking Status Measurement                       | QT | All | 15.0 [10.0,20.0]    | 15.0 [10.0,20.0]    | 15.0 [10.0,20.0]    |
| Alcohol Consumption Measurement                  | QT | All | 0.1 [0.0,26.8]      | 0.0 [0.0,18.7]      | 12.2 [0.0,36.3]     |
| Mean Reticulocyte Volume                         | QT | All | 105.8 [101.4,110.4] | 105.5 [101.1,110.1] | 106.2 [101.8,110.9] |

|                                                |    |     |                                 |                                 |                                 |
|------------------------------------------------|----|-----|---------------------------------|---------------------------------|---------------------------------|
| PR Interval                                    | QT | All | 162.0 [148.0,180.0]             | 158.0 [144.0,174.0]             | 168.0 [152.0,186.0]             |
| QT Interval                                    | QT | All | 418.0 [398.0,438.0]             | 418.0 [400.0,440.0]             | 416.0 [396.0,438.0]             |
| Neutrophil Percentage of Leukocytes            | QT | All | 61.3 [55.9,66.6]                | 61.0 [55.7,66.3]                | 61.7 [56.2,67.1]                |
| Platelet Crit                                  | QT | All | 0.2 [0.2,0.3]                   | 0.2 [0.2,0.3]                   | 0.2 [0.2,0.2]                   |
| Reticulocyte Count                             | QT | All | 0.1 [0.0,0.1]                   | 0.1 [0.0,0.1]                   | 0.1 [0.0,0.1]                   |
| Vitamin B12 Measurement                        | QT | All | 4.8 [3.0,7.7]                   | 4.7 [2.9,7.6]                   | 5.0 [3.1,7.8]                   |
| Immature Reticulocyte Fraction Measurement     | QT | All | 0.3 [0.2,0.3]                   | 0.3 [0.2,0.3]                   | 0.3 [0.2,0.3]                   |
| Monocyte Percentage of Leukocytes              | QT | All | 6.9 [5.6,8.3]                   | 6.4 [5.3,7.7]                   | 7.5 [6.2,8.9]                   |
| Hippocampal Volume                             | QT | All | 7411.3 [6905.1,7933.9]          | 7203.0 [6742.5,7654.6]          | 7672.2 [7147.5,8210.5]          |
| Intraocular Pressure Measurement               | QT | All | 15.7 [13.4,18.2]                | 15.4 [13.2,17.9]                | 16.0 [13.7,18.6]                |
| QRS Duration                                   | QT | All | 86.0 [80.0,94.0]                | 82.0 [76.0,88.0]                | 90.0 [84.0,98.0]                |
| Total Cholesterol Measurement                  | QT | All | 4.6 [4.0,5.3]                   | 4.8 [4.2,5.4]                   | 4.4 [3.8,5.0]                   |
| Body Mass Index                                | QT | All | 26.7 [24.2,29.9]                | 26.1 [23.5,29.7]                | 27.3 [25.0,30.1]                |
| Vitamin D Measurement                          | QT | All | 48.2 [33.8,63.5]                | 48.2 [33.8,63.6]                | 48.2 [33.8,63.4]                |
| Brain Volume Measurement (Neuroimaging)        | QT | All | 1155370.0 [1080240.0,1233610.0] | 1099200.0 [1041367.5,1163130.0] | 1218375.0 [1153862.5,1286557.5] |
| Mean Platelet Volume                           | QT | All | 9.2 [8.6,9.9]                   | 9.2 [8.6,10.0]                  | 9.2 [8.5,9.9]                   |
| Left Ventricular Ejection Fraction Measurement | QT | All | 59.2 [55.0,64.0]                | 60.5 [56.7,65.0]                | 58.0 [54.0,62.0]                |
| Total Blood Protein Measurement                | QT | All | 72.2 [69.6,74.9]                | 72.1 [69.5,74.8]                | 72.3 [69.8,75.0]                |
| Reticulocyte Measurement                       | QT | All | 0.1 [0.0,0.1]                   | 0.1 [0.0,0.1]                   | 0.1 [0.0,0.1]                   |
| Cystatin C Measurement                         | QT | All | 0.9 [0.8,1.0]                   | 0.9 [0.8,1.0]                   | 0.9 [0.8,1.0]                   |
| Mean Corpuscular Hemoglobin                    | QT | All | 31.6 [30.6,32.5]                | 31.4 [30.4,32.4]                | 31.7 [30.8,32.7]                |
| Aspartate Aminotransferase Measurement         | QT | All | 24.4 [21.0,28.8]                | 23.0 [20.0,26.8]                | 26.1 [22.6,30.9]                |
| Red Blood Cell Distribution Width              | QT | All | 13.3 [12.9,13.8]                | 13.3 [12.9,13.9]                | 13.3 [12.9,13.8]                |

| PGS catalog ID | Trait                                            | Female effect size | Male effect size | Ratio of effect size | Female odd ratio | Male odd ratio | Ratio of odd ratio | Type    | P-value | P-value adjusted | Bias |
|----------------|--------------------------------------------------|--------------------|------------------|----------------------|------------------|----------------|--------------------|---------|---------|------------------|------|
| PGS000010      | Coronary Artery Disease                          | 0.173              | 0.249            | 0.696                | 1.189            | 1.283          | 0.927              | Disease | 0.000   | 0.000            | M    |
| PGS000011      | Coronary Artery Disease                          | 0.128              | 0.168            | 0.760                | 1.136            | 1.183          | 0.961              | Disease | 0.000   | 0.000            | M    |
| PGS000012      | Coronary Artery Disease                          | 0.225              | 0.274            | 0.821                | 1.252            | 1.315          | 0.952              | Disease | 0.000   | 0.000            | M    |
| PGS000013      | Coronary Artery Disease                          | 0.309              | 0.420            | 0.734                | 1.362            | 1.523          | 0.894              | Disease | 0.000   | 0.000            | M    |
| PGS000014      | Type 2 Diabetes Mellitus                         | 0.447              | 0.437            | 1.024                | 1.563            | 1.547          | 1.010              | Disease | 0.336   | 0.433            | None |
| PGS000016      | Atrial Fibrillation                              | 0.361              | 0.389            | 0.930                | 1.435            | 1.475          | 0.973              | Disease | 0.012   | 0.020            | M    |
| PGS000017      | Inflammatory Bowel Disease                       | 0.383              | 0.381            | 1.007                | 1.467            | 1.463          | 1.002              | Disease | 0.909   | 0.940            | None |
| PGS000018      | Coronary Artery Disease                          | 0.334              | 0.435            | 0.768                | 1.397            | 1.545          | 0.904              | Disease | 0.000   | 0.000            | M    |
| PGS000019      | Coronary Artery Disease                          | 0.224              | 0.313            | 0.715                | 1.251            | 1.368          | 0.914              | Disease | 0.000   | 0.000            | M    |
| PGS000020      | Type 2 Diabetes Mellitus                         | 0.429              | 0.418            | 1.026                | 1.535            | 1.519          | 1.011              | Disease | 0.304   | 0.398            | None |
| PGS000021      | Type 1 Diabetes Mellitus                         | 0.487              | 0.333            | 1.463                | 1.627            | 1.395          | 1.166              | Disease | 0.000   | 0.000            | F    |
| PGS000022      | Type 1 Diabetes Mellitus                         | -0.050             | -0.045           | 1.121                | 0.951            | 0.956          | 0.995              | Disease | 0.854   | 0.893            | None |
| PGS000023      | Type 1 Diabetes Mellitus                         | 0.499              | 0.403            | 1.240                | 1.648            | 1.496          | 1.101              | Disease | 0.000   | 0.001            | F    |
| PGS000024      | Type 1 Diabetes Mellitus                         | 0.098              | 0.100            | 0.976                | 1.103            | 1.105          | 0.998              | Disease | 0.934   | 0.958            | None |
| PGS000025      | Alzheimer's Disease                              | 0.271              | 0.237            | 1.143                | 1.312            | 1.268          | 1.034              | Disease | 0.339   | 0.436            | None |
| PGS000026      | Alzheimer's Disease                              | 0.229              | 0.190            | 1.205                | 1.257            | 1.209          | 1.040              | Disease | 0.276   | 0.369            | None |
| PGS000027      | Body Mass Index                                  | 0.304              | 0.264            | 1.150                | NA               | NA             | NA                 | QT      | 0.000   | 0.000            | F    |
| PGS000031      | Type 2 Diabetes Mellitus                         | 0.328              | 0.351            | 0.935                | 1.388            | 1.420          | 0.977              | Disease | 0.028   | 0.047            | M    |
| PGS000032      | Type 2 Diabetes Mellitus                         | 0.255              | 0.282            | 0.904                | 1.290            | 1.326          | 0.973              | Disease | 0.009   | 0.015            | M    |
| PGS000033      | Type 2 Diabetes Mellitus                         | 0.130              | 0.131            | 0.995                | 1.139            | 1.140          | 0.999              | Disease | 0.946   | 0.966            | None |
| PGS000034      | Body Mass Index                                  | 0.138              | 0.123            | 1.122                | NA               | NA             | NA                 | QT      | 0.000   | 0.000            | F    |
| PGS000035      | Atrial Fibrillation                              | 0.311              | 0.361            | 0.862                | 1.365            | 1.434          | 0.951              | Disease | 0.000   | 0.000            | M    |
| PGS000036      | Type 2 Diabetes Mellitus                         | 0.480              | 0.443            | 1.084                | 1.617            | 1.558          | 1.038              | Disease | 0.001   | 0.001            | F    |
| PGS000037      | Asthma                                           | 0.089              | 0.117            | 0.761                | 1.093            | 1.124          | 0.972              | Disease | 0.004   | 0.008            | M    |
| PGS000038      | Stroke                                           | 0.066              | 0.088            | 0.748                | 1.068            | 1.092          | 0.978              | Disease | 0.186   | 0.262            | None |
| PGS000039      | Stroke                                           | 0.188              | 0.164            | 1.146                | 1.206            | 1.178          | 1.024              | Disease | 0.157   | 0.226            | None |
| PGS000040      | Celiac Disease                                   | 0.700              | 0.688            | 1.018                | 2.015            | 1.989          | 1.013              | Disease | 0.747   | 0.808            | None |
| PGS000041      | Celiac Disease                                   | 0.651              | 0.613            | 1.063                | 1.918            | 1.845          | 1.040              | Disease | 0.297   | 0.391            | None |
| PGS000042      | Celiac Disease                                   | 0.421              | 0.368            | 1.145                | 1.523            | 1.444          | 1.055              | Disease | 0.140   | 0.205            | None |
| PGS000043      | Venous Thromboembolism                           | 0.350              | 0.431            | 0.811                | 1.419            | 1.539          | 0.922              | Disease | 0.000   | 0.000            | M    |
| PGS000053      | Alzheimer's Disease                              | 0.281              | 0.234            | 1.200                | 1.324            | 1.263          | 1.048              | Disease | 0.188   | 0.265            | None |
| PGS000054      | Alzheimer's Disease                              | -0.031             | -0.054           | 0.578                | 0.969            | 0.947          | 1.023              | Disease | 0.518   | 0.613            | None |
| PGS000055      | Colorectal Cancer                                | 0.287              | 0.285            | 1.005                | 1.332            | 1.330          | 1.001              | Disease | 0.950   | 0.967            | None |
| PGS000056      | Parkinson's Disease                              | 0.320              | 0.263            | 1.217                | 1.377            | 1.301          | 1.059              | Disease | 0.067   | 0.104            | None |
| PGS000057      | Coronary Artery Disease                          | 0.136              | 0.178            | 0.765                | 1.146            | 1.195          | 0.959              | Disease | 0.000   | 0.000            | M    |
| PGS000058      | Coronary Artery Disease                          | 0.288              | 0.395            | 0.729                | 1.334            | 1.485          | 0.898              | Disease | 0.000   | 0.000            | M    |
| PGS000059      | Coronary Artery Disease                          | 0.147              | 0.194            | 0.756                | 1.158            | 1.214          | 0.954              | Disease | 0.000   | 0.000            | M    |
| PGS000060      | High-Density Lipoprotein Cholesterol Measurement | -0.261             | -0.214           | 1.219                | NA               | NA             | NA                 | QT      | 0.000   | 0.000            | F    |
| PGS000061      | Low-Density Lipoprotein Cholesterol Measurement  | -0.215             | -0.175           | 1.225                | NA               | NA             | NA                 | QT      | 0.000   | 0.000            | F    |
| PGS000062      | Total Cholesterol Measurement                    | -0.196             | -0.160           | 1.223                | NA               | NA             | NA                 | QT      | 0.000   | 0.000            | F    |
| PGS000063      | Triglyceride Measurement                         | -0.182             | -0.262           | 0.695                | NA               | NA             | NA                 | QT      | 0.000   | 0.000            | M    |
| PGS000064      | High-Density Lipoprotein Cholesterol Measurement | 0.296              | 0.235            | 1.259                | NA               | NA             | NA                 | QT      | 0.000   | 0.000            | F    |
| PGS000065      | Low-Density Lipoprotein Cholesterol Measurement  | 0.286              | 0.236            | 1.210                | NA               | NA             | NA                 | QT      | 0.000   | 0.000            | F    |
| PGS000066      | Triglyceride Measurement                         | 0.178              | 0.251            | 0.710                | NA               | NA             | NA                 | QT      | 0.000   | 0.000            | M    |
| PGS000070      | Lung Carcinoma                                   | 0.139              | 0.117            | 1.187                | 1.149            | 1.124          | 1.022              | Disease | 0.376   | 0.476            | None |
| PGS000071      | Urinary Bladder Carcinoma                        | 0.297              | 0.253            | 1.176                | 1.346            | 1.288          | 1.045              | Disease | 0.166   | 0.237            | None |
| PGS000074      | Colorectal Cancer                                | 0.235              | 0.284            | 0.829                | 1.265            | 1.328          | 0.953              | Disease | 0.026   | 0.043            | M    |
| PGS000076      | Renal Carcinoma                                  | 0.130              | 0.144            | 0.903                | 1.139            | 1.155          | 0.986              | Disease | 0.744   | 0.806            | None |
| PGS000077      | Chronic Lymphocytic Leukemia                     | 0.462              | 0.398            | 1.161                | 1.588            | 1.489          | 1.066              | Disease | 0.268   | 0.360            | None |
| PGS000078      | Lung Carcinoma                                   | 0.123              | 0.146            | 0.840                | 1.131            | 1.157          | 0.977              | Disease | 0.325   | 0.421            | None |
| PGS000079      | Melanoma                                         | 0.256              | 0.271            | 0.945                | 1.292            | 1.311          | 0.985              | Disease | 0.555   | 0.647            | None |
| PGS000080      | Non-Hodgkin's Lymphoma                           | -0.038             | -0.057           | 0.659                | 0.963            | 0.944          | 1.020              | Disease | 0.748   | 0.809            | None |
| PGS000087      | Thyroid Carcinoma                                | 0.350              | 0.407            | 0.860                | 1.419            | 1.502          | 0.944              | Disease | 0.490   | 0.588            | None |
| PGS000088      | Basophil Count                                   | 0.201              | 0.168            | 1.196                | NA               | NA             | NA                 | QT      | 0.000   | 0.000            | F    |
| PGS000089      | Basophil Percentage of Leukocytes                | 0.190              | 0.154            | 1.235                | NA               | NA             | NA                 | QT      | 0.000   | 0.000            | F    |

|           |                                                |        |        |        |       |       |       |         |       |       |      |
|-----------|------------------------------------------------|--------|--------|--------|-------|-------|-------|---------|-------|-------|------|
| PGS000090 | Eosinophil Count                               | 0.369  | 0.421  | 0.878  | NA    | NA    | NA    | QT      | 0.000 | 0.000 | M    |
| PGS000091 | Eosinophil Percentage of Leukocytes            | 0.388  | 0.439  | 0.885  | NA    | NA    | NA    | QT      | 0.000 | 0.000 | M    |
| PGS000094 | Reticulocyte Count                             | 0.246  | 0.267  | 0.922  | NA    | NA    | NA    | QT      | 0.000 | 0.000 | M    |
| PGS000095 | Reticulocyte Count                             | 0.237  | 0.255  | 0.929  | NA    | NA    | NA    | QT      | 0.000 | 0.000 | M    |
| PGS000096 | Reticulocyte Count                             | 0.136  | 0.142  | 0.958  | NA    | NA    | NA    | QT      | 0.041 | 0.066 | M    |
| PGS000097 | Lymphocyte Count                               | 0.245  | 0.227  | 1.076  | NA    | NA    | NA    | QT      | 0.000 | 0.000 | F    |
| PGS000098 | Lymphocyte Percentage of Leukocytes            | 0.411  | 0.399  | 1.031  | NA    | NA    | NA    | QT      | 0.000 | 0.000 | F    |
| PGS000099 | Mean Corpuscular Hemoglobin                    | 0.451  | 0.450  | 1.004  | NA    | NA    | NA    | QT      | 0.427 | 0.529 | None |
| PGS000100 | Mean Corpuscular Hemoglobin Concentration      | 0.218  | 0.229  | 0.953  | NA    | NA    | NA    | QT      | 0.000 | 0.000 | M    |
| PGS000101 | Mean Corpuscular Volume                        | 0.486  | 0.482  | 1.009  | NA    | NA    | NA    | QT      | 0.079 | 0.123 | None |
| PGS000102 | Monocyte Count                                 | 0.349  | 0.403  | 0.868  | NA    | NA    | NA    | QT      | 0.000 | 0.000 | M    |
| PGS000103 | Monocyte Percentage of Leukocytes              | 0.355  | 0.398  | 0.892  | NA    | NA    | NA    | QT      | 0.000 | 0.000 | M    |
| PGS000104 | Mean Platelet Volume                           | 0.643  | 0.629  | 1.021  | NA    | NA    | NA    | QT      | 0.000 | 0.000 | F    |
| PGS000105 | Neutrophil Count                               | 0.399  | 0.399  | 1.000  | NA    | NA    | NA    | QT      | 0.980 | 0.985 | None |
| PGS000106 | Neutrophil Percentage of Leukocytes            | 0.396  | 0.398  | 0.995  | NA    | NA    | NA    | QT      | 0.434 | 0.535 | None |
| PGS000107 | Platelet Crit                                  | 0.512  | 0.466  | 1.098  | NA    | NA    | NA    | QT      | 0.000 | 0.000 | F    |
| PGS000108 | Platelet Component Distribution Width          | 0.509  | 0.538  | 0.945  | NA    | NA    | NA    | QT      | 0.000 | 0.000 | M    |
| PGS000109 | Platelet Count                                 | 0.555  | 0.501  | 1.107  | NA    | NA    | NA    | QT      | 0.000 | 0.000 | F    |
| PGS000110 | Erythrocyte Count                              | 0.391  | 0.422  | 0.928  | NA    | NA    | NA    | QT      | 0.000 | 0.000 | M    |
| PGS000111 | Reticulocyte Count                             | 0.261  | 0.285  | 0.915  | NA    | NA    | NA    | QT      | 0.000 | 0.000 | M    |
| PGS000112 | Reticulocyte Count                             | 0.256  | 0.278  | 0.920  | NA    | NA    | NA    | QT      | 0.000 | 0.000 | M    |
| PGS000113 | Leukocyte Count                                | 0.374  | 0.368  | 1.017  | NA    | NA    | NA    | QT      | 0.023 | 0.039 | F    |
| PGS000115 | Low-Density Lipoprotein Cholesterol Measuremer | 0.219  | 0.181  | 1.207  | NA    | NA    | NA    | QT      | 0.000 | 0.000 | F    |
| PGS000116 | Coronary Artery Disease                        | -0.253 | -0.329 | 0.769  | 0.777 | 0.720 | 1.079 | Disease | 0.000 | 0.000 | M    |
| PGS000118 | Melanoma                                       | 0.194  | 0.223  | 0.871  | 1.214 | 1.250 | 0.972 | Disease | 0.283 | 0.377 | None |
| PGS000119 | Skin Carcinoma                                 | 0.356  | 0.356  | 1.002  | 1.428 | 1.427 | 1.001 | Disease | 0.950 | 0.967 | None |
| PGS000120 | Skin Carcinoma                                 | 0.232  | 0.267  | 0.869  | 1.261 | 1.306 | 0.966 | Disease | 0.001 | 0.002 | M    |
| PGS000121 | Bone Density                                   | -0.071 | -0.081 | 0.878  | NA    | NA    | NA    | QT      | 0.009 | 0.016 | M    |
| PGS000122 | Bone Density                                   | -0.066 | -0.076 | 0.861  | NA    | NA    | NA    | QT      | 0.005 | 0.008 | M    |
| PGS000123 | Parkinson's Disease                            | 0.245  | 0.196  | 1.251  | 1.278 | 1.217 | 1.050 | Disease | 0.093 | 0.142 | None |
| PGS000124 | Intraocular Pressure Measurement               | 0.134  | 0.154  | 0.871  | NA    | NA    | NA    | QT      | 0.001 | 0.002 | M    |
| PGS000125 | Type 2 Diabetes Mellitus                       | 0.298  | 0.299  | 0.998  | 1.348 | 1.349 | 0.999 | Disease | 0.947 | 0.966 | None |
| PGS000126 | Urate Measurement                              | 0.241  | 0.216  | 1.114  | NA    | NA    | NA    | QT      | 0.000 | 0.000 | F    |
| PGS000127 | HbA1c Measurement                              | 0.087  | 0.108  | 0.807  | NA    | NA    | NA    | QT      | 0.000 | 0.000 | M    |
| PGS000128 | HbA1c Measurement                              | 0.039  | 0.051  | 0.760  | NA    | NA    | NA    | QT      | 0.000 | 0.000 | M    |
| PGS000129 | HbA1c Measurement                              | 0.038  | 0.049  | 0.789  | NA    | NA    | NA    | QT      | 0.000 | 0.001 | M    |
| PGS000130 | HbA1c Measurement                              | 0.085  | 0.100  | 0.847  | NA    | NA    | NA    | QT      | 0.000 | 0.000 | M    |
| PGS000131 | HbA1c Measurement                              | 0.059  | 0.062  | 0.948  | NA    | NA    | NA    | QT      | 0.264 | 0.355 | None |
| PGS000132 | HbA1c Measurement                              | 0.078  | 0.093  | 0.839  | NA    | NA    | NA    | QT      | 0.000 | 0.000 | M    |
| PGS000133 | Schizophrenia                                  | 0.581  | 0.541  | 1.073  | 1.787 | 1.718 | 1.040 | Disease | 0.492 | 0.589 | None |
| PGS000134 | Schizophrenia                                  | 0.610  | 0.573  | 1.065  | 1.841 | 1.773 | 1.038 | Disease | 0.515 | 0.610 | None |
| PGS000135 | Schizophrenia                                  | 0.587  | 0.554  | 1.059  | 1.798 | 1.740 | 1.033 | Disease | 0.564 | 0.654 | None |
| PGS000136 | Schizophrenia                                  | 0.606  | 0.566  | 1.072  | 1.834 | 1.761 | 1.042 | Disease | 0.474 | 0.572 | None |
| PGS000137 | Glaucoma                                       | 0.660  | 0.752  | 0.877  | 1.934 | 2.122 | 0.911 | Disease | 0.000 | 0.000 | M    |
| PGS000146 | Colorectal Cancer                              | 0.234  | 0.259  | 0.903  | 1.263 | 1.296 | 0.975 | Disease | 0.256 | 0.347 | None |
| PGS000147 | Colorectal Cancer                              | 0.165  | 0.205  | 0.804  | 1.180 | 1.228 | 0.961 | Disease | 0.072 | 0.112 | None |
| PGS000148 | Colorectal Cancer                              | 0.244  | 0.273  | 0.896  | 1.277 | 1.313 | 0.972 | Disease | 0.196 | 0.274 | None |
| PGS000149 | Colorectal Cancer                              | 0.207  | 0.218  | 0.948  | 1.230 | 1.244 | 0.989 | Disease | 0.607 | 0.693 | None |
| PGS000150 | Colorectal Cancer                              | 0.231  | 0.238  | 0.971  | 1.260 | 1.269 | 0.993 | Disease | 0.754 | 0.814 | None |
| PGS000151 | Colorectal Cancer                              | -0.003 | 0.002  | -1.861 | 0.997 | 1.002 | 0.995 | Disease | 0.817 | 0.863 | None |
| PGS000152 | Urinary Bladder Carcinoma                      | 0.256  | 0.245  | 1.045  | 1.291 | 1.277 | 1.011 | Disease | 0.726 | 0.791 | None |
| PGS000154 | Colorectal Cancer                              | 0.170  | 0.199  | 0.854  | 1.186 | 1.221 | 0.971 | Disease | 0.191 | 0.267 | None |
| PGS000156 | Lung Carcinoma                                 | 0.078  | 0.070  | 1.126  | 1.082 | 1.072 | 1.009 | Disease | 0.723 | 0.789 | None |
| PGS000157 | Melanoma                                       | 0.276  | 0.277  | 0.997  | 1.318 | 1.319 | 0.999 | Disease | 0.971 | 0.981 | None |
| PGS000159 | Pancreatic Carcinoma                           | 0.258  | 0.256  | 1.005  | 1.294 | 1.292 | 1.001 | Disease | 0.977 | 0.983 | None |
| PGS000161 | Renal Carcinoma                                | 0.145  | 0.146  | 0.994  | 1.156 | 1.157 | 0.999 | Disease | 0.983 | 0.987 | None |

|           |                                                  |        |        |       |       |       |       |         |       |       |      |
|-----------|--------------------------------------------------|--------|--------|-------|-------|-------|-------|---------|-------|-------|------|
| PGS000162 | Thyroid Carcinoma                                | 0.130  | 0.189  | 0.690 | 1.139 | 1.208 | 0.943 | Disease | 0.467 | 0.567 | None |
| PGS000163 | Basophil Count                                   | 0.141  | 0.116  | 1.219 | NA    | NA    | NA    | QT      | 0.000 | 0.000 | F    |
| PGS000164 | Basophil Percentage of Leukocytes                | 0.147  | 0.115  | 1.277 | NA    | NA    | NA    | QT      | 0.000 | 0.000 | F    |
| PGS000165 | Eosinophil Count                                 | 0.268  | 0.306  | 0.875 | NA    | NA    | NA    | QT      | 0.000 | 0.000 | M    |
| PGS000166 | Eosinophil Percentage of Leukocytes              | 0.272  | 0.309  | 0.880 | NA    | NA    | NA    | QT      | 0.000 | 0.000 | M    |
| PGS000169 | Reticulocyte Count                               | 0.183  | 0.199  | 0.919 | NA    | NA    | NA    | QT      | 0.000 | 0.000 | M    |
| PGS000170 | Reticulocyte Count                               | 0.181  | 0.198  | 0.915 | NA    | NA    | NA    | QT      | 0.000 | 0.000 | M    |
| PGS000171 | Reticulocyte Count                               | 0.109  | 0.114  | 0.959 | NA    | NA    | NA    | QT      | 0.111 | 0.166 | None |
| PGS000172 | Lymphocyte Count                                 | 0.161  | 0.148  | 1.085 | NA    | NA    | NA    | QT      | 0.000 | 0.000 | F    |
| PGS000173 | Lymphocyte Percentage of Leukocytes              | 0.271  | 0.255  | 1.062 | NA    | NA    | NA    | QT      | 0.000 | 0.000 | F    |
| PGS000174 | Mean Corpuscular Hemoglobin                      | 0.358  | 0.356  | 1.005 | NA    | NA    | NA    | QT      | 0.471 | 0.570 | None |
| PGS000175 | Mean Corpuscular Hemoglobin Concentration        | 0.157  | 0.165  | 0.952 | NA    | NA    | NA    | QT      | 0.005 | 0.009 | M    |
| PGS000176 | Mean Corpuscular Volume                          | 0.382  | 0.379  | 1.008 | NA    | NA    | NA    | QT      | 0.250 | 0.340 | None |
| PGS000177 | Monocyte Count                                   | 0.251  | 0.291  | 0.865 | NA    | NA    | NA    | QT      | 0.000 | 0.000 | M    |
| PGS000178 | Monocyte Percentage of Leukocytes                | 0.258  | 0.292  | 0.883 | NA    | NA    | NA    | QT      | 0.000 | 0.000 | M    |
| PGS000179 | Mean Platelet Volume                             | 0.541  | 0.532  | 1.018 | NA    | NA    | NA    | QT      | 0.000 | 0.000 | F    |
| PGS000180 | Mean Reticulocyte Volume                         | 0.362  | 0.365  | 0.993 | NA    | NA    | NA    | QT      | 0.361 | 0.461 | None |
| PGS000181 | Mean Corpuscular Volume                          | 0.321  | 0.319  | 1.007 | NA    | NA    | NA    | QT      | 0.414 | 0.517 | None |
| PGS000182 | Neutrophil Count                                 | 0.263  | 0.259  | 1.017 | NA    | NA    | NA    | QT      | 0.116 | 0.174 | None |
| PGS000183 | Neutrophil Percentage of Leukocytes              | 0.252  | 0.249  | 1.014 | NA    | NA    | NA    | QT      | 0.225 | 0.309 | None |
| PGS000184 | Platelet Crit                                    | 0.372  | 0.334  | 1.117 | NA    | NA    | NA    | QT      | 0.000 | 0.000 | F    |
| PGS000185 | Platelet Component Distribution Width            | 0.396  | 0.422  | 0.938 | NA    | NA    | NA    | QT      | 0.000 | 0.000 | M    |
| PGS000186 | Platelet Count                                   | 0.421  | 0.376  | 1.121 | NA    | NA    | NA    | QT      | 0.000 | 0.000 | F    |
| PGS000187 | Erythrocyte Count                                | 0.274  | 0.291  | 0.939 | NA    | NA    | NA    | QT      | 0.000 | 0.000 | M    |
| PGS000188 | Red Blood Cell Distribution Width                | 0.288  | 0.257  | 1.119 | NA    | NA    | NA    | QT      | 0.000 | 0.000 | F    |
| PGS000189 | Reticulocyte Count                               | 0.191  | 0.209  | 0.914 | NA    | NA    | NA    | QT      | 0.000 | 0.000 | M    |
| PGS000190 | Reticulocyte Count                               | 0.185  | 0.202  | 0.916 | NA    | NA    | NA    | QT      | 0.000 | 0.000 | M    |
| PGS000191 | Leukocyte Count                                  | 0.236  | 0.227  | 1.042 | NA    | NA    | NA    | QT      | 0.001 | 0.002 | F    |
| PGS000194 | Rheumatoid Arthritis                             | 0.123  | 0.130  | 0.943 | 1.131 | 1.139 | 0.993 | Disease | 0.721 | 0.788 | None |
| PGS000195 | Rheumatoid Arthritis                             | 0.123  | 0.130  | 0.943 | 1.131 | 1.139 | 0.993 | Disease | 0.721 | 0.788 | None |
| PGS000196 | Systemic Lupus Erythematosus                     | 0.422  | 0.263  | 1.602 | 1.524 | 1.301 | 1.172 | Disease | 0.092 | 0.140 | None |
| PGS000198 | Psoriasis                                        | 0.189  | 0.293  | 0.645 | 1.208 | 1.340 | 0.901 | Disease | 0.000 | 0.000 | M    |
| PGS000199 | Gout                                             | 0.026  | 0.060  | 0.431 | 1.026 | 1.062 | 0.966 | Disease | 0.181 | 0.256 | None |
| PGS000200 | Coronary Artery Disease                          | 0.146  | 0.210  | 0.695 | 1.157 | 1.234 | 0.938 | Disease | 0.000 | 0.000 | M    |
| PGS000201 | Alcohol Consumption Measurement                  | 0.087  | 0.126  | 0.692 | NA    | NA    | NA    | QT      | 0.000 | 0.000 | M    |
| PGS000202 | Alcohol Consumption Measurement                  | 0.087  | 0.125  | 0.697 | NA    | NA    | NA    | QT      | 0.000 | 0.000 | M    |
| PGS000203 | Alcohol Consumption Measurement                  | 0.166  | 0.255  | 0.650 | NA    | NA    | NA    | QT      | 0.000 | 0.000 | M    |
| PGS000204 | Alcohol Consumption Measurement                  | 0.164  | 0.252  | 0.651 | NA    | NA    | NA    | QT      | 0.000 | 0.000 | M    |
| PGS000207 | Thyroid Carcinoma                                | 0.413  | 0.498  | 0.829 | 1.511 | 1.645 | 0.918 | Disease | 0.277 | 0.369 | None |
| PGS000208 | Thyroid Carcinoma                                | 0.411  | 0.508  | 0.809 | 1.508 | 1.661 | 0.908 | Disease | 0.216 | 0.298 | None |
| PGS000209 | Thyroid Carcinoma                                | 0.407  | 0.491  | 0.829 | 1.502 | 1.634 | 0.919 | Disease | 0.288 | 0.382 | None |
| PGS000211 | Parkinson's Disease                              | 0.153  | 0.131  | 1.171 | 1.165 | 1.140 | 1.023 | Disease | 0.474 | 0.572 | None |
| PGS000296 | Coronary Artery Disease                          | 0.308  | 0.397  | 0.775 | 1.360 | 1.487 | 0.915 | Disease | 0.000 | 0.000 | M    |
| PGS000297 | Body Height                                      | 0.337  | 0.366  | 0.923 | NA    | NA    | NA    | QT      | 0.000 | 0.000 | M    |
| PGS000298 | Body Mass Index                                  | 0.255  | 0.223  | 1.145 | NA    | NA    | NA    | QT      | 0.000 | 0.000 | F    |
| PGS000299 | Waist Hip Ratio                                  | 0.180  | 0.075  | 2.401 | NA    | NA    | NA    | QT      | 0.000 | 0.000 | F    |
| PGS000301 | Systolic Blood Pressure                          | 0.207  | 0.161  | 1.282 | NA    | NA    | NA    | QT      | 0.000 | 0.000 | F    |
| PGS000302 | Diastolic Blood Pressure                         | 0.191  | 0.166  | 1.150 | NA    | NA    | NA    | QT      | 0.000 | 0.000 | F    |
| PGS000303 | Glomerular Filtration Rate                       | -0.142 | -0.167 | 0.852 | NA    | NA    | NA    | QT      | 0.000 | 0.000 | M    |
| PGS000304 | HbA1c Measurement                                | 0.129  | 0.153  | 0.843 | NA    | NA    | NA    | QT      | 0.000 | 0.000 | M    |
| PGS000309 | High-Density Lipoprotein Cholesterol Measurement | 0.311  | 0.257  | 1.208 | NA    | NA    | NA    | QT      | 0.000 | 0.000 | F    |
| PGS000310 | Low-Density Lipoprotein Cholesterol Measurement  | 0.301  | 0.244  | 1.236 | NA    | NA    | NA    | QT      | 0.000 | 0.000 | F    |
| PGS000311 | Total Cholesterol Measurement                    | 0.258  | 0.223  | 1.159 | NA    | NA    | NA    | QT      | 0.000 | 0.000 | F    |
| PGS000312 | Triglyceride Measurement                         | 0.207  | 0.300  | 0.690 | NA    | NA    | NA    | QT      | 0.000 | 0.000 | M    |
| PGS000313 | Lipoprotein(a) Measurement                       | 0.629  | 0.630  | 0.997 | NA    | NA    | NA    | QT      | 0.531 | 0.625 | None |
| PGS000314 | C-Reactive Protein Measurement                   | 0.119  | 0.096  | 1.240 | NA    | NA    | NA    | QT      | 0.000 | 0.000 | F    |

|           |                                                |       |        |        |       |       |       |         |       |       |      |
|-----------|------------------------------------------------|-------|--------|--------|-------|-------|-------|---------|-------|-------|------|
| PGS000316 | Celiac Disease                                 | 0.268 | 0.202  | 1.326  | 1.308 | 1.224 | 1.068 | Disease | 0.065 | 0.103 | None |
| PGS000320 | Body Mass Index                                | 0.279 | 0.240  | 1.162  | NA    | NA    | NA    | QT      | 0.000 | 0.000 | F    |
| PGS000321 | Testosterone Measurement                       | 0.022 | 0.155  | 0.141  | NA    | NA    | NA    | QT      | 0.000 | 0.000 | M    |
| PGS000328 | Systemic Lupus Erythematosus                   | 0.055 | 0.071  | 0.776  | 1.056 | 1.073 | 0.984 | Disease | 0.873 | 0.911 | None |
| PGS000329 | Coronary Artery Disease                        | 0.744 | 0.919  | 0.810  | 2.105 | 2.506 | 0.840 | Disease | 0.000 | 0.000 | M    |
| PGS000330 | Type 2 Diabetes Mellitus                       | 0.968 | 0.996  | 0.972  | 2.634 | 2.708 | 0.973 | Disease | 0.017 | 0.029 | M    |
| PGS000331 | Atrial Fibrillation                            | 0.706 | 0.786  | 0.898  | 2.025 | 2.195 | 0.923 | Disease | 0.000 | 0.000 | M    |
| PGS000334 | Alzheimer's Disease                            | 0.797 | 0.658  | 1.212  | 2.219 | 1.931 | 1.149 | Disease | 0.000 | 0.000 | F    |
| PGS000337 | Coronary Artery Disease                        | 0.661 | 0.812  | 0.815  | 1.937 | 2.252 | 0.860 | Disease | 0.000 | 0.000 | M    |
| PGS000338 | Atrial Fibrillation                            | 0.380 | 0.440  | 0.864  | 1.462 | 1.552 | 0.942 | Disease | 0.000 | 0.000 | M    |
| PGS000339 | Melanoma                                       | 0.321 | 0.331  | 0.969  | 1.378 | 1.392 | 0.990 | Disease | 0.685 | 0.758 | None |
| PGS000340 | Low-Density Lipoprotein Cholesterol Measuremer | 0.166 | 0.143  | 1.157  | NA    | NA    | NA    | QT      | 0.000 | 0.000 | F    |
| PGS000342 | Psoriasis                                      | 0.010 | -0.027 | -0.366 | 1.010 | 0.973 | 1.038 | Disease | 0.156 | 0.225 | None |
| PGS000349 | Coronary Artery Disease                        | 0.085 | 0.120  | 0.709  | 1.089 | 1.128 | 0.966 | Disease | 0.000 | 0.001 | M    |
| PGS000350 | Glaucoma                                       | 0.251 | 0.242  | 1.036  | 1.285 | 1.274 | 1.009 | Disease | 0.629 | 0.713 | None |
| PGS000363 | Esophageal Cancer                              | 0.822 | 0.814  | 1.009  | 2.275 | 2.258 | 1.008 | Disease | 0.783 | 0.835 | None |
| PGS000364 | Esophageal Cancer                              | 0.279 | 0.362  | 0.770  | 1.321 | 1.436 | 0.920 | Disease | 0.104 | 0.157 | None |
| PGS000365 | Esophageal Cancer                              | 0.676 | 0.678  | 0.997  | 1.966 | 1.971 | 0.998 | Disease | 0.926 | 0.952 | None |
| PGS000366 | Esophageal Cancer                              | 0.894 | 0.879  | 1.017  | 2.446 | 2.409 | 1.015 | Disease | 0.578 | 0.667 | None |
| PGS000367 | Colorectal Cancer                              | 0.353 | 0.384  | 0.921  | 1.424 | 1.468 | 0.970 | Disease | 0.174 | 0.248 | None |
| PGS000368 | Colorectal Cancer                              | 0.353 | 0.384  | 0.921  | 1.424 | 1.468 | 0.970 | Disease | 0.174 | 0.248 | None |
| PGS000369 | Colorectal Cancer                              | 0.361 | 0.395  | 0.913  | 1.435 | 1.485 | 0.966 | Disease | 0.124 | 0.184 | None |
| PGS000370 | Colorectal Cancer                              | 0.364 | 0.399  | 0.912  | 1.439 | 1.491 | 0.965 | Disease | 0.114 | 0.171 | None |
| PGS000371 | Colorectal Cancer                              | 0.201 | 0.221  | 0.913  | 1.223 | 1.247 | 0.981 | Disease | 0.379 | 0.480 | None |
| PGS000372 | Colorectal Cancer                              | 0.238 | 0.246  | 0.969  | 1.269 | 1.278 | 0.992 | Disease | 0.725 | 0.791 | None |
| PGS000373 | Colorectal Cancer                              | 1.116 | 1.181  | 0.945  | 3.052 | 3.256 | 0.937 | Disease | 0.001 | 0.001 | M    |
| PGS000374 | Colorectal Cancer                              | 0.247 | 0.287  | 0.860  | 1.280 | 1.332 | 0.961 | Disease | 0.061 | 0.097 | None |
| PGS000375 | Colorectal Cancer                              | 0.245 | 0.286  | 0.858  | 1.278 | 1.331 | 0.960 | Disease | 0.069 | 0.107 | None |
| PGS000376 | Colon Carcinoma                                | 1.040 | 1.089  | 0.956  | 2.830 | 2.971 | 0.953 | Disease | 0.010 | 0.018 | M    |
| PGS000377 | Colon Carcinoma                                | 1.038 | 1.098  | 0.946  | 2.825 | 2.999 | 0.942 | Disease | 0.003 | 0.005 | M    |
| PGS000378 | Colon Carcinoma                                | 0.903 | 0.918  | 0.983  | 2.466 | 2.505 | 0.984 | Disease | 0.370 | 0.470 | None |
| PGS000379 | Colon Carcinoma                                | 0.905 | 0.934  | 0.969  | 2.473 | 2.545 | 0.972 | Disease | 0.127 | 0.187 | None |
| PGS000380 | Colon Carcinoma                                | 1.187 | 1.247  | 0.953  | 3.279 | 3.479 | 0.943 | Disease | 0.003 | 0.006 | M    |
| PGS000381 | Colon Carcinoma                                | 0.162 | 0.240  | 0.675  | 1.176 | 1.271 | 0.925 | Disease | 0.001 | 0.001 | M    |
| PGS000382 | Colon Carcinoma                                | 0.241 | 0.303  | 0.795  | 1.273 | 1.354 | 0.940 | Disease | 0.009 | 0.016 | M    |
| PGS000385 | Pancreatic Carcinoma                           | 0.336 | 0.290  | 1.158  | 1.399 | 1.336 | 1.047 | Disease | 0.308 | 0.402 | None |
| PGS000386 | Pancreatic Carcinoma                           | 0.263 | 0.260  | 1.013  | 1.301 | 1.297 | 1.004 | Disease | 0.937 | 0.959 | None |
| PGS000388 | Lung Carcinoma                                 | 0.825 | 0.837  | 0.986  | 2.282 | 2.308 | 0.989 | Disease | 0.521 | 0.615 | None |
| PGS000389 | Lung Carcinoma                                 | 0.162 | 0.156  | 1.039  | 1.176 | 1.169 | 1.006 | Disease | 0.804 | 0.853 | None |
| PGS000390 | Lung Carcinoma                                 | 0.162 | 0.156  | 1.039  | 1.176 | 1.169 | 1.006 | Disease | 0.804 | 0.853 | None |
| PGS000391 | Lung Carcinoma                                 | 0.180 | 0.179  | 1.006  | 1.197 | 1.196 | 1.001 | Disease | 0.965 | 0.977 | None |
| PGS000392 | Lung Carcinoma                                 | 0.187 | 0.187  | 0.999  | 1.206 | 1.206 | 1.000 | Disease | 0.996 | 0.997 | None |
| PGS000393 | Lung Carcinoma                                 | 0.912 | 0.933  | 0.978  | 2.489 | 2.542 | 0.979 | Disease | 0.252 | 0.343 | None |
| PGS000394 | Lung Carcinoma                                 | 0.912 | 0.933  | 0.978  | 2.489 | 2.542 | 0.979 | Disease | 0.252 | 0.343 | None |
| PGS000395 | Lung Carcinoma                                 | 0.971 | 0.992  | 0.979  | 2.641 | 2.696 | 0.980 | Disease | 0.271 | 0.363 | None |
| PGS000396 | Lung Carcinoma                                 | 0.311 | 0.266  | 1.169  | 1.365 | 1.305 | 1.046 | Disease | 0.059 | 0.094 | None |
| PGS000397 | Lung Carcinoma                                 | 0.913 | 0.933  | 0.978  | 2.491 | 2.542 | 0.980 | Disease | 0.241 | 0.329 | None |
| PGS000398 | Skin Carcinoma                                 | 0.271 | 0.255  | 1.063  | 1.312 | 1.291 | 1.016 | Disease | 0.106 | 0.159 | None |
| PGS000399 | Skin Carcinoma                                 | 0.132 | 0.131  | 1.004  | 1.141 | 1.140 | 1.001 | Disease | 0.955 | 0.970 | None |
| PGS000400 | Skin Carcinoma                                 | 0.369 | 0.377  | 0.978  | 1.446 | 1.458 | 0.992 | Disease | 0.451 | 0.551 | None |
| PGS000401 | Skin Carcinoma                                 | 0.753 | 0.750  | 1.004  | 2.124 | 2.118 | 1.003 | Disease | 0.779 | 0.832 | None |
| PGS000402 | Skin Carcinoma                                 | 0.442 | 0.454  | 0.973  | 1.555 | 1.575 | 0.988 | Disease | 0.264 | 0.355 | None |
| PGS000403 | Skin Carcinoma                                 | 0.558 | 0.564  | 0.990  | 1.747 | 1.757 | 0.994 | Disease | 0.607 | 0.693 | None |
| PGS000404 | Skin Carcinoma                                 | 0.362 | 0.378  | 0.959  | 1.436 | 1.459 | 0.985 | Disease | 0.154 | 0.224 | None |
| PGS000405 | Skin Carcinoma                                 | 0.854 | 0.849  | 1.005  | 2.348 | 2.337 | 1.005 | Disease | 0.693 | 0.765 | None |
| PGS000406 | Skin Carcinoma                                 | 0.425 | 0.451  | 0.943  | 1.530 | 1.570 | 0.975 | Disease | 0.020 | 0.034 | M    |

|           |                |       |       |       |       |       |       |         |       |       |      |
|-----------|----------------|-------|-------|-------|-------|-------|-------|---------|-------|-------|------|
| PGS000407 | Skin Carcinoma | 0.460 | 0.484 | 0.950 | 1.584 | 1.623 | 0.976 | Disease | 0.028 | 0.046 | M    |
| PGS000408 | Melanoma       | 0.269 | 0.243 | 1.108 | 1.308 | 1.275 | 1.026 | Disease | 0.280 | 0.373 | None |
| PGS000409 | Melanoma       | 0.653 | 0.565 | 1.155 | 1.921 | 1.760 | 1.092 | Disease | 0.000 | 0.000 | F    |
| PGS000410 | Melanoma       | 0.274 | 0.239 | 1.144 | 1.315 | 1.270 | 1.035 | Disease | 0.149 | 0.217 | None |
| PGS000411 | Melanoma       | 0.280 | 0.254 | 1.102 | 1.323 | 1.289 | 1.026 | Disease | 0.259 | 0.350 | None |
| PGS000412 | Melanoma       | 0.308 | 0.296 | 1.041 | 1.361 | 1.344 | 1.012 | Disease | 0.618 | 0.703 | None |
| PGS000413 | Melanoma       | 0.893 | 0.874 | 1.022 | 2.442 | 2.396 | 1.019 | Disease | 0.289 | 0.382 | None |
| PGS000414 | Melanoma       | 0.331 | 0.317 | 1.045 | 1.393 | 1.373 | 1.014 | Disease | 0.563 | 0.654 | None |
| PGS000415 | Melanoma       | 0.367 | 0.357 | 1.027 | 1.443 | 1.429 | 1.010 | Disease | 0.675 | 0.752 | None |
| PGS000416 | Melanoma       | 0.310 | 0.303 | 1.024 | 1.363 | 1.353 | 1.007 | Disease | 0.766 | 0.822 | None |
| PGS000417 | Melanoma       | 1.009 | 0.959 | 1.053 | 2.744 | 2.608 | 1.052 | Disease | 0.008 | 0.013 | F    |
| PGS000418 | Melanoma       | 0.310 | 0.303 | 1.024 | 1.363 | 1.353 | 1.007 | Disease | 0.766 | 0.822 | None |
| PGS000419 | Melanoma       | 0.325 | 0.314 | 1.036 | 1.384 | 1.369 | 1.011 | Disease | 0.621 | 0.706 | None |
| PGS000420 | Melanoma       | 0.243 | 0.245 | 0.989 | 1.275 | 1.278 | 0.997 | Disease | 0.916 | 0.945 | None |
| PGS000421 | Melanoma       | 0.321 | 0.342 | 0.938 | 1.378 | 1.408 | 0.979 | Disease | 0.417 | 0.519 | None |
| PGS000422 | Melanoma       | 0.321 | 0.342 | 0.938 | 1.378 | 1.408 | 0.979 | Disease | 0.417 | 0.519 | None |
| PGS000423 | Melanoma       | 0.351 | 0.372 | 0.943 | 1.420 | 1.451 | 0.979 | Disease | 0.418 | 0.520 | None |
| PGS000424 | Melanoma       | 0.346 | 0.359 | 0.963 | 1.413 | 1.432 | 0.987 | Disease | 0.608 | 0.693 | None |
| PGS000425 | Melanoma       | 0.336 | 0.352 | 0.953 | 1.399 | 1.422 | 0.984 | Disease | 0.535 | 0.628 | None |
| PGS000426 | Melanoma       | 0.336 | 0.352 | 0.953 | 1.399 | 1.422 | 0.984 | Disease | 0.535 | 0.628 | None |
| PGS000427 | Melanoma       | 0.336 | 0.352 | 0.953 | 1.399 | 1.422 | 0.984 | Disease | 0.535 | 0.628 | None |
| PGS000428 | Melanoma       | 0.336 | 0.352 | 0.953 | 1.399 | 1.422 | 0.984 | Disease | 0.535 | 0.628 | None |
| PGS000429 | Melanoma       | 0.349 | 0.340 | 1.027 | 1.418 | 1.405 | 1.009 | Disease | 0.703 | 0.773 | None |
| PGS000430 | Melanoma       | 1.356 | 1.254 | 1.081 | 3.882 | 3.506 | 1.107 | Disease | 0.000 | 0.000 | F    |
| PGS000431 | Melanoma       | 0.364 | 0.346 | 1.053 | 1.439 | 1.413 | 1.019 | Disease | 0.452 | 0.552 | None |
| PGS000432 | Melanoma       | 0.375 | 0.364 | 1.028 | 1.455 | 1.440 | 1.010 | Disease | 0.654 | 0.735 | None |
| PGS000433 | Skin Carcinoma | 0.374 | 0.382 | 0.980 | 1.454 | 1.465 | 0.992 | Disease | 0.491 | 0.588 | None |
| PGS000434 | Skin Carcinoma | 0.711 | 0.734 | 0.967 | 2.035 | 2.084 | 0.976 | Disease | 0.032 | 0.053 | M    |
| PGS000435 | Skin Carcinoma | 0.446 | 0.456 | 0.978 | 1.562 | 1.578 | 0.990 | Disease | 0.366 | 0.467 | None |
| PGS000436 | Skin Carcinoma | 0.611 | 0.629 | 0.970 | 1.841 | 1.876 | 0.981 | Disease | 0.095 | 0.145 | None |
| PGS000437 | Skin Carcinoma | 0.337 | 0.345 | 0.976 | 1.401 | 1.412 | 0.992 | Disease | 0.448 | 0.548 | None |
| PGS000438 | Skin Carcinoma | 0.756 | 0.792 | 0.955 | 2.130 | 2.208 | 0.965 | Disease | 0.001 | 0.003 | M    |
| PGS000439 | Skin Carcinoma | 0.426 | 0.458 | 0.930 | 1.531 | 1.581 | 0.968 | Disease | 0.004 | 0.007 | M    |
| PGS000440 | Skin Carcinoma | 0.429 | 0.439 | 0.977 | 1.535 | 1.551 | 0.990 | Disease | 0.361 | 0.461 | None |
| PGS000441 | Skin Carcinoma | 0.359 | 0.371 | 0.969 | 1.432 | 1.449 | 0.988 | Disease | 0.286 | 0.380 | None |
| PGS000442 | Skin Carcinoma | 0.814 | 0.846 | 0.962 | 2.257 | 2.331 | 0.968 | Disease | 0.005 | 0.008 | M    |
| PGS000443 | Skin Carcinoma | 0.398 | 0.418 | 0.951 | 1.488 | 1.519 | 0.980 | Disease | 0.065 | 0.103 | None |
| PGS000444 | Skin Carcinoma | 0.548 | 0.578 | 0.947 | 1.730 | 1.783 | 0.970 | Disease | 0.006 | 0.011 | M    |
| PGS000445 | Skin Carcinoma | 0.249 | 0.244 | 1.019 | 1.283 | 1.277 | 1.005 | Disease | 0.660 | 0.739 | None |
| PGS000446 | Skin Carcinoma | 0.558 | 0.459 | 1.215 | 1.748 | 1.583 | 1.104 | Disease | 0.000 | 0.000 | F    |
| PGS000447 | Skin Carcinoma | 0.323 | 0.310 | 1.042 | 1.381 | 1.364 | 1.013 | Disease | 0.232 | 0.317 | None |
| PGS000448 | Skin Carcinoma | 0.293 | 0.274 | 1.069 | 1.340 | 1.315 | 1.019 | Disease | 0.080 | 0.123 | None |
| PGS000449 | Skin Carcinoma | 0.137 | 0.134 | 1.020 | 1.146 | 1.143 | 1.003 | Disease | 0.794 | 0.845 | None |
| PGS000450 | Skin Carcinoma | 0.042 | 0.055 | 0.771 | 1.043 | 1.056 | 0.988 | Disease | 0.251 | 0.341 | None |
| PGS000451 | Skin Carcinoma | 0.126 | 0.125 | 1.012 | 1.135 | 1.133 | 1.002 | Disease | 0.888 | 0.924 | None |
| PGS000452 | Skin Carcinoma | 0.341 | 0.356 | 0.957 | 1.406 | 1.428 | 0.985 | Disease | 0.166 | 0.237 | None |
| PGS000453 | Skin Carcinoma | 0.341 | 0.356 | 0.957 | 1.406 | 1.428 | 0.985 | Disease | 0.166 | 0.237 | None |
| PGS000454 | Skin Carcinoma | 0.338 | 0.356 | 0.950 | 1.402 | 1.427 | 0.983 | Disease | 0.111 | 0.166 | None |
| PGS000455 | Skin Carcinoma | 0.341 | 0.356 | 0.957 | 1.406 | 1.428 | 0.985 | Disease | 0.166 | 0.237 | None |
| PGS000456 | Skin Carcinoma | 0.352 | 0.353 | 0.998 | 1.422 | 1.423 | 0.999 | Disease | 0.956 | 0.970 | None |
| PGS000457 | Skin Carcinoma | 0.352 | 0.353 | 0.998 | 1.422 | 1.423 | 0.999 | Disease | 0.956 | 0.970 | None |
| PGS000458 | Skin Carcinoma | 0.353 | 0.351 | 1.007 | 1.423 | 1.420 | 1.002 | Disease | 0.830 | 0.873 | None |
| PGS000459 | Skin Carcinoma | 0.354 | 0.351 | 1.009 | 1.425 | 1.421 | 1.003 | Disease | 0.784 | 0.836 | None |
| PGS000460 | Skin Carcinoma | 0.126 | 0.135 | 0.935 | 1.134 | 1.144 | 0.991 | Disease | 0.401 | 0.504 | None |
| PGS000461 | Skin Carcinoma | 0.238 | 0.274 | 0.868 | 1.268 | 1.315 | 0.965 | Disease | 0.001 | 0.002 | M    |
| PGS000462 | Skin Carcinoma | 0.238 | 0.274 | 0.868 | 1.268 | 1.315 | 0.965 | Disease | 0.001 | 0.002 | M    |

|           |                              |        |        |       |       |       |       |         |       |       |      |
|-----------|------------------------------|--------|--------|-------|-------|-------|-------|---------|-------|-------|------|
| PGS000463 | Skin Carcinoma               | 0.230  | 0.267  | 0.863 | 1.259 | 1.305 | 0.964 | Disease | 0.001 | 0.002 | M    |
| PGS000464 | Skin Carcinoma               | 0.242  | 0.279  | 0.866 | 1.274 | 1.322 | 0.963 | Disease | 0.001 | 0.001 | M    |
| PGS000465 | Skin Carcinoma               | 0.232  | 0.267  | 0.869 | 1.261 | 1.306 | 0.966 | Disease | 0.001 | 0.002 | M    |
| PGS000466 | Skin Carcinoma               | 0.232  | 0.267  | 0.869 | 1.261 | 1.306 | 0.966 | Disease | 0.001 | 0.002 | M    |
| PGS000467 | Skin Carcinoma               | 0.231  | 0.266  | 0.868 | 1.260 | 1.305 | 0.966 | Disease | 0.001 | 0.002 | M    |
| PGS000468 | Skin Carcinoma               | 0.233  | 0.268  | 0.872 | 1.263 | 1.307 | 0.966 | Disease | 0.001 | 0.003 | M    |
| PGS000469 | Skin Carcinoma               | 0.152  | 0.171  | 0.890 | 1.164 | 1.186 | 0.981 | Disease | 0.060 | 0.095 | None |
| PGS000470 | Skin Carcinoma               | 0.164  | 0.184  | 0.888 | 1.178 | 1.203 | 0.979 | Disease | 0.051 | 0.081 | None |
| PGS000471 | Skin Carcinoma               | 0.189  | 0.214  | 0.881 | 1.208 | 1.239 | 0.975 | Disease | 0.013 | 0.023 | M    |
| PGS000605 | Renal Carcinoma              | 0.106  | 0.111  | 0.956 | 1.112 | 1.118 | 0.995 | Disease | 0.906 | 0.938 | None |
| PGS000606 | Renal Carcinoma              | 0.106  | 0.111  | 0.956 | 1.112 | 1.118 | 0.995 | Disease | 0.906 | 0.938 | None |
| PGS000607 | Urinary Bladder Carcinoma    | 0.581  | 0.533  | 1.090 | 1.787 | 1.704 | 1.049 | Disease | 0.009 | 0.016 | F    |
| PGS000608 | Urinary Bladder Carcinoma    | 0.599  | 0.591  | 1.013 | 1.820 | 1.806 | 1.008 | Disease | 0.692 | 0.765 | None |
| PGS000609 | Urinary Bladder Carcinoma    | 0.166  | 0.183  | 0.904 | 1.180 | 1.201 | 0.983 | Disease | 0.580 | 0.668 | None |
| PGS000610 | Urinary Bladder Carcinoma    | 0.282  | 0.244  | 1.157 | 1.326 | 1.276 | 1.039 | Disease | 0.224 | 0.308 | None |
| PGS000611 | Urinary Bladder Carcinoma    | 0.282  | 0.244  | 1.157 | 1.326 | 1.276 | 1.039 | Disease | 0.224 | 0.308 | None |
| PGS000612 | Urinary Bladder Carcinoma    | 0.282  | 0.244  | 1.157 | 1.326 | 1.276 | 1.039 | Disease | 0.224 | 0.308 | None |
| PGS000613 | Urinary Bladder Carcinoma    | 0.297  | 0.249  | 1.193 | 1.346 | 1.282 | 1.049 | Disease | 0.128 | 0.189 | None |
| PGS000614 | Urinary Bladder Carcinoma    | 1.311  | 1.219  | 1.076 | 3.711 | 3.385 | 1.096 | Disease | 0.000 | 0.000 | F    |
| PGS000615 | Urinary Bladder Carcinoma    | 0.499  | 0.480  | 1.039 | 1.646 | 1.616 | 1.019 | Disease | 0.537 | 0.630 | None |
| PGS000616 | Urinary Bladder Carcinoma    | 0.461  | 0.449  | 1.028 | 1.586 | 1.567 | 1.013 | Disease | 0.694 | 0.765 | None |
| PGS000620 | Brain Cancer                 | 0.575  | 0.659  | 0.872 | 1.777 | 1.933 | 0.919 | Disease | 0.147 | 0.214 | None |
| PGS000621 | Brain Cancer                 | 0.356  | 0.460  | 0.774 | 1.427 | 1.584 | 0.901 | Disease | 0.066 | 0.103 | None |
| PGS000622 | Brain Cancer                 | 0.356  | 0.460  | 0.774 | 1.427 | 1.584 | 0.901 | Disease | 0.066 | 0.103 | None |
| PGS000623 | Brain Cancer                 | 0.345  | 0.451  | 0.764 | 1.412 | 1.571 | 0.899 | Disease | 0.059 | 0.093 | None |
| PGS000624 | Brain Cancer                 | 0.339  | 0.437  | 0.776 | 1.403 | 1.548 | 0.907 | Disease | 0.074 | 0.114 | None |
| PGS000625 | Brain Cancer                 | 0.386  | 0.412  | 0.938 | 1.472 | 1.510 | 0.975 | Disease | 0.626 | 0.711 | None |
| PGS000626 | Thyroid Carcinoma            | 0.218  | 0.312  | 0.699 | 1.244 | 1.366 | 0.910 | Disease | 0.220 | 0.304 | None |
| PGS000627 | Thyroid Carcinoma            | 0.383  | 0.409  | 0.937 | 1.467 | 1.505 | 0.975 | Disease | 0.731 | 0.796 | None |
| PGS000628 | Thyroid Carcinoma            | 0.435  | 0.531  | 0.819 | 1.544 | 1.701 | 0.908 | Disease | 0.211 | 0.293 | None |
| PGS000629 | Thyroid Carcinoma            | 0.370  | 0.411  | 0.900 | 1.448 | 1.508 | 0.960 | Disease | 0.584 | 0.671 | None |
| PGS000630 | Thyroid Carcinoma            | 0.413  | 0.502  | 0.823 | 1.512 | 1.652 | 0.915 | Disease | 0.260 | 0.351 | None |
| PGS000631 | Thyroid Carcinoma            | 0.413  | 0.502  | 0.823 | 1.512 | 1.652 | 0.915 | Disease | 0.260 | 0.351 | None |
| PGS000632 | Thyroid Carcinoma            | 0.407  | 0.483  | 0.844 | 1.503 | 1.621 | 0.927 | Disease | 0.338 | 0.436 | None |
| PGS000633 | Thyroid Carcinoma            | 0.396  | 0.464  | 0.854 | 1.486 | 1.590 | 0.934 | Disease | 0.381 | 0.482 | None |
| PGS000634 | Thyroid Carcinoma            | 0.774  | 0.858  | 0.902 | 2.169 | 2.358 | 0.920 | Disease | 0.031 | 0.051 | M    |
| PGS000635 | Thyroid Carcinoma            | 0.340  | 0.426  | 0.798 | 1.406 | 1.532 | 0.918 | Disease | 0.227 | 0.311 | None |
| PGS000636 | Thyroid Carcinoma            | 0.547  | 0.504  | 1.087 | 1.729 | 1.655 | 1.045 | Disease | 0.545 | 0.637 | None |
| PGS000637 | Hodgkin's Lymphoma           | 0.579  | 0.568  | 1.019 | 1.785 | 1.765 | 1.011 | Disease | 0.600 | 0.688 | None |
| PGS000638 | Hodgkin's Lymphoma           | 0.345  | 0.069  | 4.970 | 1.412 | 1.072 | 1.318 | Disease | 0.002 | 0.004 | F    |
| PGS000639 | Hodgkin's Lymphoma           | 0.391  | 0.105  | 3.712 | 1.478 | 1.111 | 1.331 | Disease | 0.001 | 0.002 | F    |
| PGS000640 | Hodgkin's Lymphoma           | 0.463  | 0.482  | 0.961 | 1.589 | 1.619 | 0.981 | Disease | 0.389 | 0.491 | None |
| PGS000641 | Non-Hodgkin's Lymphoma       | 0.084  | 0.101  | 0.827 | 1.087 | 1.106 | 0.983 | Disease | 0.767 | 0.822 | None |
| PGS000642 | Non-Hodgkin's Lymphoma       | -0.104 | -0.045 | 2.319 | 0.901 | 0.956 | 0.942 | Disease | 0.332 | 0.429 | None |
| PGS000643 | Non-Hodgkin's Lymphoma       | 0.065  | 0.087  | 0.741 | 1.067 | 1.091 | 0.978 | Disease | 0.677 | 0.752 | None |
| PGS000644 | Non-Hodgkin's Lymphoma       | 0.025  | 0.049  | 0.510 | 1.025 | 1.051 | 0.976 | Disease | 0.680 | 0.755 | None |
| PGS000645 | Chronic Lymphocytic Leukemia | 0.409  | 0.349  | 1.171 | 1.505 | 1.418 | 1.062 | Disease | 0.277 | 0.370 | None |
| PGS000646 | Chronic Lymphocytic Leukemia | 0.677  | 0.653  | 1.037 | 1.967 | 1.920 | 1.024 | Disease | 0.682 | 0.756 | None |
| PGS000647 | Chronic Lymphocytic Leukemia | 0.677  | 0.653  | 1.037 | 1.967 | 1.920 | 1.024 | Disease | 0.682 | 0.756 | None |
| PGS000648 | Chronic Lymphocytic Leukemia | 0.675  | 0.673  | 1.003 | 1.964 | 1.960 | 1.002 | Disease | 0.970 | 0.980 | None |
| PGS000649 | Chronic Lymphocytic Leukemia | 0.682  | 0.646  | 1.055 | 1.978 | 1.908 | 1.036 | Disease | 0.545 | 0.638 | None |
| PGS000650 | Chronic Lymphocytic Leukemia | 0.390  | 0.386  | 1.009 | 1.476 | 1.471 | 1.003 | Disease | 0.945 | 0.966 | None |
| PGS000651 | Chronic Lymphocytic Leukemia | 0.492  | 0.537  | 0.917 | 1.636 | 1.710 | 0.957 | Disease | 0.434 | 0.535 | None |
| PGS000652 | Multiple Myeloma             | 0.262  | 0.272  | 0.964 | 1.300 | 1.312 | 0.990 | Disease | 0.825 | 0.869 | None |
| PGS000653 | Multiple Myeloma             | 0.290  | 0.317  | 0.916 | 1.337 | 1.373 | 0.974 | Disease | 0.570 | 0.660 | None |
| PGS000654 | Multiple Myeloma             | 0.282  | 0.317  | 0.891 | 1.326 | 1.373 | 0.966 | Disease | 0.464 | 0.564 | None |

|           |                                                  |        |        |       |       |       |       |         |       |       |      |
|-----------|--------------------------------------------------|--------|--------|-------|-------|-------|-------|---------|-------|-------|------|
| PGS000655 | Non-Alcoholic Fatty Liver Disease                | 0.189  | 0.187  | 1.015 | 1.209 | 1.205 | 1.003 | Disease | 0.886 | 0.922 | None |
| PGS000657 | Bone Density                                     | 0.501  | 0.545  | 0.919 | NA    | NA    | NA    | QT      | 0.000 | 0.000 | M    |
| PGS000658 | Total Cholesterol Measurement                    | 0.140  | 0.112  | 1.245 | NA    | NA    | NA    | QT      | 0.000 | 0.000 | F    |
| PGS000659 | Triglyceride Measurement                         | 0.132  | 0.194  | 0.680 | NA    | NA    | NA    | QT      | 0.000 | 0.000 | M    |
| PGS000660 | High-Density Lipoprotein Cholesterol Measurement | 0.218  | 0.176  | 1.239 | NA    | NA    | NA    | QT      | 0.000 | 0.000 | F    |
| PGS000661 | Low-Density Lipoprotein Cholesterol Measurement  | 0.107  | 0.088  | 1.218 | NA    | NA    | NA    | QT      | 0.000 | 0.000 | F    |
| PGS000663 | Pancreatic Carcinoma                             | 0.331  | 0.329  | 1.006 | 1.392 | 1.389 | 1.002 | Disease | 0.965 | 0.977 | None |
| PGS000665 | Stroke                                           | 0.034  | 0.082  | 0.412 | 1.034 | 1.085 | 0.953 | Disease | 0.004 | 0.007 | M    |
| PGS000667 | Lipoprotein(a) Measurement                       | 0.731  | 0.738  | 0.991 | NA    | NA    | NA    | QT      | 0.002 | 0.004 | M    |
| PGS000668 | Serum Alanine Aminotransferase Measurement       | 0.226  | 0.319  | 0.708 | NA    | NA    | NA    | QT      | 0.000 | 0.000 | M    |
| PGS000669 | Serum Albumin Measurement                        | 0.345  | 0.342  | 1.009 | NA    | NA    | NA    | QT      | 0.271 | 0.363 | None |
| PGS000670 | Alkaline Phosphatase Measurement                 | 0.437  | 0.440  | 0.993 | NA    | NA    | NA    | QT      | 0.240 | 0.328 | None |
| PGS000671 | Apolipoprotein A1 Measurement                    | 0.404  | 0.334  | 1.208 | NA    | NA    | NA    | QT      | 0.000 | 0.000 | F    |
| PGS000672 | Apolipoprotein B Measurement                     | 0.388  | 0.317  | 1.221 | NA    | NA    | NA    | QT      | 0.000 | 0.000 | F    |
| PGS000673 | Aspartate Aminotransferase Measurement           | 0.226  | 0.293  | 0.771 | NA    | NA    | NA    | QT      | 0.000 | 0.000 | M    |
| PGS000675 | C-Reactive Protein Measurement                   | 0.273  | 0.222  | 1.228 | NA    | NA    | NA    | QT      | 0.000 | 0.000 | F    |
| PGS000676 | Calcium Measurement                              | 0.346  | 0.329  | 1.052 | NA    | NA    | NA    | QT      | 0.000 | 0.000 | F    |
| PGS000677 | Total Cholesterol Measurement                    | 0.356  | 0.313  | 1.137 | NA    | NA    | NA    | QT      | 0.000 | 0.000 | F    |
| PGS000678 | Creatinine Measurement                           | 0.257  | 0.318  | 0.810 | NA    | NA    | NA    | QT      | 0.000 | 0.000 | M    |
| PGS000680 | Cystatin C Measurement                           | 0.372  | 0.387  | 0.962 | NA    | NA    | NA    | QT      | 0.000 | 0.000 | M    |
| PGS000681 | Bilirubin Measurement                            | 0.406  | 0.528  | 0.769 | NA    | NA    | NA    | QT      | 0.000 | 0.000 | M    |
| PGS000682 | Glomerular Filtration Rate                       | -0.247 | -0.310 | 0.796 | NA    | NA    | NA    | QT      | 0.000 | 0.000 | M    |
| PGS000683 | Serum Gamma-Glutamyl Transferase Measurement     | 0.243  | 0.341  | 0.712 | NA    | NA    | NA    | QT      | 0.000 | 0.000 | M    |
| PGS000684 | Glucose Measurement                              | 0.122  | 0.174  | 0.702 | NA    | NA    | NA    | QT      | 0.000 | 0.000 | M    |
| PGS000685 | HbA1c Measurement                                | 0.284  | 0.378  | 0.751 | NA    | NA    | NA    | QT      | 0.000 | 0.000 | M    |
| PGS000686 | High-Density Lipoprotein Cholesterol Measurement | 0.517  | 0.420  | 1.231 | NA    | NA    | NA    | QT      | 0.000 | 0.000 | F    |
| PGS000687 | IGF-1 Measurement                                | 0.446  | 0.450  | 0.991 | NA    | NA    | NA    | QT      | 0.119 | 0.177 | None |
| PGS000688 | Low-Density Lipoprotein Cholesterol Measurement  | 0.406  | 0.339  | 1.199 | NA    | NA    | NA    | QT      | 0.000 | 0.000 | F    |
| PGS000689 | Lipoprotein(a) Measurement                       | 0.725  | 0.719  | 1.008 | NA    | NA    | NA    | QT      | 0.009 | 0.016 | F    |
| PGS000692 | Phosphate Measurement                            | 0.298  | 0.339  | 0.879 | NA    | NA    | NA    | QT      | 0.000 | 0.000 | M    |
| PGS000693 | Urinary Potassium Measurement                    | 0.118  | 0.112  | 1.054 | NA    | NA    | NA    | QT      | 0.035 | 0.058 | F    |
| PGS000696 | Testosterone Measurement                         | 0.023  | 0.159  | 0.142 | NA    | NA    | NA    | QT      | 0.000 | 0.000 | M    |
| PGS000697 | Bilirubin Measurement                            | 0.397  | 0.512  | 0.775 | NA    | NA    | NA    | QT      | 0.000 | 0.000 | M    |
| PGS000698 | Total Blood Protein Measurement                  | 0.390  | 0.390  | 1.000 | NA    | NA    | NA    | QT      | 0.950 | 0.967 | None |
| PGS000699 | Triglyceride Measurement                         | 0.334  | 0.459  | 0.727 | NA    | NA    | NA    | QT      | 0.000 | 0.000 | M    |
| PGS000700 | Urate Measurement                                | 0.400  | 0.353  | 1.135 | NA    | NA    | NA    | QT      | 0.000 | 0.000 | F    |
| PGS000702 | Vitamin D Measurement                            | 0.269  | 0.274  | 0.985 | NA    | NA    | NA    | QT      | 0.155 | 0.225 | None |
| PGS000703 | Coronary Artery Disease                          | 0.371  | 0.429  | 0.866 | 1.449 | 1.535 | 0.944 | Disease | 0.000 | 0.000 | M    |
| PGS000706 | Hypertension                                     | 0.666  | 0.618  | 1.079 | 1.947 | 1.854 | 1.050 | Disease | 0.000 | 0.000 | F    |
| PGS000707 | Cholecystitis                                    | 0.441  | 0.371  | 1.189 | 1.554 | 1.449 | 1.073 | Disease | 0.000 | 0.000 | F    |
| PGS000709 | Heart Failure                                    | 0.226  | 0.238  | 0.949 | 1.254 | 1.269 | 0.988 | Disease | 0.429 | 0.531 | None |
| PGS000710 | Coronary Artery Disease                          | 0.320  | 0.418  | 0.765 | 1.377 | 1.519 | 0.906 | Disease | 0.000 | 0.000 | M    |
| PGS000711 | Gout                                             | 0.686  | 0.735  | 0.934 | 1.986 | 2.085 | 0.953 | Disease | 0.062 | 0.098 | None |
| PGS000712 | Type 2 Diabetes Mellitus                         | 0.734  | 0.733  | 1.001 | 2.083 | 2.081 | 1.001 | Disease | 0.938 | 0.959 | None |
| PGS000713 | Type 2 Diabetes Mellitus                         | 0.734  | 0.743  | 0.988 | 2.083 | 2.102 | 0.991 | Disease | 0.423 | 0.524 | None |
| PGS000717 | Body Mass Index                                  | 0.262  | 0.218  | 1.201 | NA    | NA    | NA    | QT      | 0.000 | 0.000 | F    |
| PGS000720 | Colorectal Cancer                                | 0.342  | 0.378  | 0.906 | 1.408 | 1.459 | 0.965 | Disease | 0.109 | 0.164 | None |
| PGS000721 | Lung Carcinoma                                   | 0.210  | 0.185  | 1.139 | 1.234 | 1.203 | 1.026 | Disease | 0.303 | 0.396 | None |
| PGS000722 | Renal Carcinoma                                  | 0.218  | 0.200  | 1.088 | 1.243 | 1.222 | 1.018 | Disease | 0.680 | 0.755 | None |
| PGS000723 | Urinary Bladder Carcinoma                        | 0.287  | 0.263  | 1.089 | 1.332 | 1.301 | 1.024 | Disease | 0.457 | 0.557 | None |
| PGS000725 | Pancreatic Carcinoma                             | 0.364  | 0.347  | 1.047 | 1.439 | 1.416 | 1.016 | Disease | 0.720 | 0.788 | None |
| PGS000727 | Atrial Fibrillation                              | 0.799  | 0.902  | 0.886 | 2.224 | 2.464 | 0.903 | Disease | 0.000 | 0.000 | M    |
| PGS000728 | Chronic Kidney Disease                           | 0.196  | 0.151  | 1.294 | 1.216 | 1.163 | 1.045 | Disease | 0.001 | 0.001 | F    |
| PGS000729 | Type 2 Diabetes Mellitus                         | 0.936  | 0.959  | 0.977 | 2.551 | 2.608 | 0.978 | Disease | 0.053 | 0.084 | None |
| PGS000730 | Skin Carcinoma                                   | 0.325  | 0.353  | 0.921 | 1.385 | 1.424 | 0.973 | Disease | 0.012 | 0.021 | M    |
| PGS000731 | Skin Carcinoma                                   | 0.214  | 0.246  | 0.869 | 1.238 | 1.279 | 0.968 | Disease | 0.003 | 0.006 | M    |

|           |                                                 |        |        |        |       |       |       |         |       |       |      |
|-----------|-------------------------------------------------|--------|--------|--------|-------|-------|-------|---------|-------|-------|------|
| PGS000732 | Melanoma                                        | 0.258  | 0.252  | 1.023  | 1.294 | 1.286 | 1.006 | Disease | 0.819 | 0.865 | None |
| PGS000734 | Colorectal Cancer                               | 0.356  | 0.385  | 0.924  | 1.427 | 1.470 | 0.971 | Disease | 0.188 | 0.265 | None |
| PGS000735 | PR Interval                                     | 0.191  | 0.219  | 0.872  | NA    | NA    | NA    | QT      | 0.002 | 0.004 | M    |
| PGS000736 | QRS Duration                                    | 0.115  | 0.137  | 0.839  | NA    | NA    | NA    | QT      | 0.002 | 0.004 | M    |
| PGS000738 | Vitiligo                                        | 0.762  | 0.704  | 1.083  | 2.142 | 2.021 | 1.060 | Disease | 0.671 | 0.748 | None |
| PGS000740 | Lung Carcinoma                                  | 0.218  | 0.204  | 1.068  | 1.243 | 1.226 | 1.014 | Disease | 0.568 | 0.658 | None |
| PGS000743 | Melanoma                                        | 0.415  | 0.405  | 1.026  | 1.515 | 1.499 | 1.011 | Disease | 0.676 | 0.752 | None |
| PGS000744 | Melanoma                                        | 0.361  | 0.352  | 1.024  | 1.434 | 1.422 | 1.008 | Disease | 0.737 | 0.801 | None |
| PGS000745 | Melanoma                                        | 0.125  | 0.128  | 0.980  | 1.133 | 1.136 | 0.997 | Disease | 0.920 | 0.948 | None |
| PGS000746 | Coronary Artery Disease                         | 0.243  | 0.347  | 0.701  | 1.275 | 1.415 | 0.901 | Disease | 0.000 | 0.000 | M    |
| PGS000747 | Coronary Artery Disease                         | 0.255  | 0.306  | 0.832  | 1.290 | 1.358 | 0.950 | Disease | 0.000 | 0.000 | M    |
| PGS000748 | Coronary Artery Disease                         | 0.248  | 0.290  | 0.854  | 1.281 | 1.337 | 0.958 | Disease | 0.000 | 0.000 | M    |
| PGS000749 | Coronary Artery Disease                         | 0.247  | 0.291  | 0.849  | 1.281 | 1.338 | 0.957 | Disease | 0.000 | 0.000 | M    |
| PGS000750 | Parkinson's Disease                             | 0.313  | 0.272  | 1.151  | 1.367 | 1.312 | 1.042 | Disease | 0.188 | 0.264 | None |
| PGS000752 | Lipoprotein(a) Measurement                      | -0.505 | -0.496 | 1.018  | NA    | NA    | NA    | QT      | 0.001 | 0.002 | F    |
| PGS000753 | Abdominal Aortic Aneurysm                       | 0.297  | 0.298  | 0.995  | 1.345 | 1.347 | 0.998 | Disease | 0.972 | 0.981 | None |
| PGS000754 | Systemic Lupus Erythematosus                    | 0.130  | 0.206  | 0.631  | 1.139 | 1.229 | 0.927 | Disease | 0.440 | 0.540 | None |
| PGS000758 | Body Height                                     | 0.454  | 0.495  | 0.918  | NA    | NA    | NA    | QT      | 0.000 | 0.000 | M    |
| PGS000759 | Hypothyroidism                                  | 0.578  | 0.528  | 1.095  | 1.783 | 1.695 | 1.051 | Disease | 0.000 | 0.000 | F    |
| PGS000760 | Vitiligo                                        | 0.705  | 0.542  | 1.301  | 2.024 | 1.719 | 1.177 | Disease | 0.230 | 0.316 | None |
| PGS000761 | Hypothyroidism                                  | 1.245  | 1.083  | 1.150  | 3.472 | 2.952 | 1.176 | Disease | 0.000 | 0.000 | F    |
| PGS000764 | Glaucoma                                        | 0.252  | 0.232  | 1.090  | 1.287 | 1.261 | 1.021 | Disease | 0.246 | 0.335 | None |
| PGS000765 | Colorectal Cancer                               | 0.356  | 0.385  | 0.924  | 1.427 | 1.470 | 0.971 | Disease | 0.188 | 0.265 | None |
| PGS000766 | Melanoma                                        | 0.485  | 0.518  | 0.937  | 1.624 | 1.679 | 0.968 | Disease | 0.200 | 0.280 | None |
| PGS000768 | QT Interval                                     | 0.191  | 0.168  | 1.142  | NA    | NA    | NA    | QT      | 0.010 | 0.017 | F    |
| PGS000770 | Body Mass Index                                 | 0.077  | 0.072  | 1.073  | NA    | NA    | NA    | QT      | 0.059 | 0.094 | None |
| PGS000771 | Systemic Lupus Erythematosus                    | 0.421  | 0.202  | 2.087  | 1.524 | 1.224 | 1.245 | Disease | 0.023 | 0.039 | F    |
| PGS000772 | Systemic Lupus Erythematosus                    | 0.395  | 0.226  | 1.752  | 1.485 | 1.253 | 1.185 | Disease | 0.078 | 0.121 | None |
| PGS000777 | Parkinson's Disease                             | 0.020  | -0.013 | -1.582 | 1.020 | 0.988 | 1.033 | Disease | 0.300 | 0.394 | None |
| PGS000779 | Alzheimer's Disease                             | 0.674  | 0.556  | 1.211  | 1.961 | 1.744 | 1.125 | Disease | 0.000 | 0.000 | F    |
| PGS000782 | Urinary Bladder Carcinoma                       | 0.301  | 0.266  | 1.132  | 1.351 | 1.304 | 1.036 | Disease | 0.267 | 0.359 | None |
| PGS000785 | Colorectal Cancer                               | 0.345  | 0.390  | 0.884  | 1.412 | 1.477 | 0.956 | Disease | 0.042 | 0.068 | M    |
| PGS000787 | Renal Carcinoma                                 | 0.118  | 0.131  | 0.901  | 1.125 | 1.139 | 0.987 | Disease | 0.761 | 0.818 | None |
| PGS000788 | Chronic Lymphocytic Leukemia                    | 0.632  | 0.577  | 1.094  | 1.881 | 1.781 | 1.056 | Disease | 0.359 | 0.459 | None |
| PGS000789 | Lung Carcinoma                                  | 0.121  | 0.151  | 0.800  | 1.129 | 1.164 | 0.970 | Disease | 0.200 | 0.280 | None |
| PGS000790 | Melanoma                                        | 0.253  | 0.263  | 0.962  | 1.288 | 1.301 | 0.990 | Disease | 0.692 | 0.765 | None |
| PGS000791 | Non-Hodgkin's Lymphoma                          | -0.033 | -0.051 | 0.647  | 0.968 | 0.950 | 1.018 | Disease | 0.766 | 0.822 | None |
| PGS000794 | Pancreatic Carcinoma                            | 0.354  | 0.322  | 1.100  | 1.425 | 1.380 | 1.033 | Disease | 0.477 | 0.575 | None |
| PGS000797 | Thyroid Carcinoma                               | 0.384  | 0.504  | 0.762  | 1.468 | 1.656 | 0.887 | Disease | 0.133 | 0.196 | None |
| PGS000798 | Coronary Artery Disease                         | 0.254  | 0.365  | 0.695  | 1.289 | 1.441 | 0.895 | Disease | 0.000 | 0.000 | M    |
| PGS000799 | Asthma                                          | 0.172  | 0.214  | 0.802  | 1.188 | 1.239 | 0.958 | Disease | 0.000 | 0.000 | M    |
| PGS000801 | Colorectal Cancer                               | 0.247  | 0.258  | 0.955  | 1.280 | 1.295 | 0.988 | Disease | 0.597 | 0.685 | None |
| PGS000802 | Colorectal Cancer                               | -0.082 | -0.050 | 1.665  | 0.921 | 0.952 | 0.968 | Disease | 0.142 | 0.208 | None |
| PGS000803 | Systemic Lupus Erythematosus                    | 0.528  | 0.427  | 1.236  | 1.696 | 1.533 | 1.106 | Disease | 0.273 | 0.365 | None |
| PGS000804 | Type 2 Diabetes Mellitus                        | 0.528  | 0.540  | 0.977  | 1.695 | 1.716 | 0.988 | Disease | 0.258 | 0.349 | None |
| PGS000805 | Type 2 Diabetes Mellitus                        | 0.529  | 0.539  | 0.981  | 1.697 | 1.715 | 0.990 | Disease | 0.339 | 0.436 | None |
| PGS000806 | Type 2 Diabetes Mellitus                        | 0.367  | 0.388  | 0.948  | 1.444 | 1.473 | 0.980 | Disease | 0.060 | 0.094 | None |
| PGS000807 | Type 2 Diabetes Mellitus                        | 0.309  | 0.311  | 0.996  | 1.362 | 1.364 | 0.999 | Disease | 0.895 | 0.928 | None |
| PGS000808 | Type 2 Diabetes Mellitus                        | 0.411  | 0.422  | 0.975  | 1.509 | 1.525 | 0.990 | Disease | 0.329 | 0.426 | None |
| PGS000809 | Multiple Sclerosis                              | 0.448  | 0.494  | 0.908  | 1.566 | 1.639 | 0.956 | Disease | 0.334 | 0.431 | None |
| PGS000811 | Alzheimer's Disease                             | 0.331  | 0.306  | 1.079  | 1.392 | 1.358 | 1.025 | Disease | 0.483 | 0.581 | None |
| PGS000812 | Alzheimer's Disease                             | 0.250  | 0.164  | 1.518  | 1.283 | 1.179 | 1.089 | Disease | 0.016 | 0.027 | F    |
| PGS000813 | Melanoma                                        | 0.399  | 0.391  | 1.019  | 1.490 | 1.479 | 1.007 | Disease | 0.770 | 0.824 | None |
| PGS000814 | Low-Density Lipoprotein Cholesterol Measurement | 0.134  | 0.124  | 1.077  | NA    | NA    | NA    | QT      | 0.001 | 0.002 | F    |
| PGS000815 | Alkaline Phosphatase Measurement                | 0.260  | 0.268  | 0.969  | NA    | NA    | NA    | QT      | 0.003 | 0.005 | M    |
| PGS000816 | Serum Alanine Aminotransferase Measurement      | 0.122  | 0.190  | 0.642  | NA    | NA    | NA    | QT      | 0.000 | 0.000 | M    |

|           |                                                |        |        |       |       |       |       |         |       |       |      |
|-----------|------------------------------------------------|--------|--------|-------|-------|-------|-------|---------|-------|-------|------|
| PGS000817 | erum Gamma-Glutamyl Transferase Measureme      | 0.155  | 0.216  | 0.715 | NA    | NA    | NA    | QT      | 0.000 | 0.000 | M    |
| PGS000818 | Coronary Artery Disease                        | 0.225  | 0.308  | 0.729 | 1.252 | 1.361 | 0.920 | Disease | 0.000 | 0.000 | M    |
| PGS000819 | Diabetic Retinopathy                           | 0.297  | 0.362  | 0.821 | 1.346 | 1.436 | 0.937 | Disease | 0.012 | 0.020 | M    |
| PGS000820 | Hypothyroidism                                 | 1.300  | 1.026  | 1.266 | 3.668 | 2.791 | 1.314 | Disease | 0.000 | 0.000 | F    |
| PGS000823 | Alzheimer's Disease                            | 0.279  | 0.228  | 1.222 | 1.322 | 1.256 | 1.052 | Disease | 0.148 | 0.216 | None |
| PGS000824 | ow-Density Lipoprotein Cholesterol Measuremer  | 0.268  | 0.219  | 1.223 | NA    | NA    | NA    | QT      | 0.000 | 0.000 | F    |
| PGS000825 | igh-Density Lipoprotein Cholesterol Measuremer | -0.318 | -0.258 | 1.233 | NA    | NA    | NA    | QT      | 0.000 | 0.000 | F    |
| PGS000826 | Triglyceride Measurement                       | 0.185  | 0.265  | 0.698 | NA    | NA    | NA    | QT      | 0.000 | 0.000 | M    |
| PGS000831 | Total Cholesterol Measurement                  | 0.235  | 0.201  | 1.171 | NA    | NA    | NA    | QT      | 0.000 | 0.000 | F    |
| PGS000832 | Type 2 Diabetes Mellitus                       | 0.538  | 0.543  | 0.992 | 1.713 | 1.721 | 0.996 | Disease | 0.676 | 0.752 | None |
| PGS000841 | Body Mass Index                                | 0.135  | 0.119  | 1.134 | NA    | NA    | NA    | QT      | 0.000 | 0.000 | F    |
| PGS000842 | Waist Hip Ratio                                | 0.077  | 0.040  | 1.907 | NA    | NA    | NA    | QT      | 0.000 | 0.000 | F    |
| PGS000843 | Waist Hip Ratio                                | 0.094  | 0.033  | 2.825 | NA    | NA    | NA    | QT      | 0.000 | 0.000 | F    |
| PGS000845 | igh-Density Lipoprotein Cholesterol Measuremer | 0.292  | 0.241  | 1.214 | NA    | NA    | NA    | QT      | 0.000 | 0.000 | F    |
| PGS000846 | ow-Density Lipoprotein Cholesterol Measuremer  | 0.259  | 0.213  | 1.218 | NA    | NA    | NA    | QT      | 0.000 | 0.000 | F    |
| PGS000847 | Triglyceride Measurement                       | 0.170  | 0.247  | 0.690 | NA    | NA    | NA    | QT      | 0.000 | 0.000 | M    |
| PGS000848 | Type 2 Diabetes Mellitus                       | 0.098  | 0.089  | 1.094 | 1.103 | 1.093 | 1.008 | Disease | 0.416 | 0.519 | None |
| PGS000849 | Type 2 Diabetes Mellitus                       | 0.049  | 0.066  | 0.745 | 1.051 | 1.069 | 0.983 | Disease | 0.107 | 0.161 | None |
| PGS000850 | Type 2 Diabetes Mellitus                       | 0.140  | 0.123  | 1.131 | 1.150 | 1.131 | 1.016 | Disease | 0.120 | 0.179 | None |
| PGS000851 | Type 2 Diabetes Mellitus                       | 0.163  | 0.157  | 1.039 | 1.177 | 1.170 | 1.006 | Disease | 0.560 | 0.651 | None |
| PGS000852 | Type 2 Diabetes Mellitus                       | 0.201  | 0.206  | 0.976 | 1.223 | 1.229 | 0.995 | Disease | 0.624 | 0.709 | None |
| PGS000853 | Type 2 Diabetes Mellitus                       | 0.118  | 0.121  | 0.979 | 1.126 | 1.128 | 0.998 | Disease | 0.804 | 0.853 | None |
| PGS000854 | Type 2 Diabetes Mellitus                       | 0.204  | 0.215  | 0.951 | 1.227 | 1.240 | 0.989 | Disease | 0.316 | 0.411 | None |
| PGS000855 | Type 2 Diabetes Mellitus                       | 0.144  | 0.135  | 1.069 | 1.155 | 1.144 | 1.009 | Disease | 0.375 | 0.475 | None |
| PGS000856 | Type 2 Diabetes Mellitus                       | 0.045  | 0.060  | 0.753 | 1.046 | 1.062 | 0.985 | Disease | 0.155 | 0.225 | None |
| PGS000857 | Type 2 Diabetes Mellitus                       | -0.002 | -0.017 | 0.090 | 0.998 | 0.983 | 1.016 | Disease | 0.128 | 0.189 | None |
| PGS000858 | Type 2 Diabetes Mellitus                       | 0.084  | 0.109  | 0.770 | 1.087 | 1.115 | 0.975 | Disease | 0.018 | 0.031 | M    |
| PGS000859 | Chronic Kidney Disease                         | 0.169  | 0.160  | 1.056 | 1.184 | 1.173 | 1.009 | Disease | 0.499 | 0.595 | None |
| PGS000860 | Glomerular Filtration Rate                     | -0.127 | -0.151 | 0.844 | NA    | NA    | NA    | QT      | 0.000 | 0.000 | M    |
| PGS000862 | Diabetic Retinopathy                           | 0.005  | 0.030  | 0.153 | 1.005 | 1.030 | 0.975 | Disease | 0.382 | 0.483 | None |
| PGS000868 | Type 2 Diabetes Mellitus                       | 0.466  | 0.465  | 0.981 | 1.578 | 1.592 | 0.991 | Disease | 0.406 | 0.509 | None |
| PGS000869 | Type 1 Diabetes Mellitus                       | 0.343  | 0.255  | 1.346 | 1.409 | 1.290 | 1.092 | Disease | 0.003 | 0.005 | F    |
| PGS000872 | Non-Alcoholic Fatty Liver Disease              | 0.155  | 0.157  | 0.985 | 1.168 | 1.170 | 0.998 | Disease | 0.911 | 0.941 | None |
| PGS000874 | Chronic Lymphocytic Leukemia                   | 0.702  | 0.706  | 0.995 | 2.018 | 2.026 | 0.996 | Disease | 0.948 | 0.966 | None |
| PGS000875 | ow-Density Lipoprotein Cholesterol Measuremer  | 0.235  | 0.189  | 1.241 | NA    | NA    | NA    | QT      | 0.000 | 0.000 | F    |
| PGS000876 | Alzheimer's Disease                            | 0.274  | 0.232  | 1.182 | 1.315 | 1.261 | 1.043 | Disease | 0.234 | 0.321 | None |
| PGS000879 | Intraocular Pressure Measurement               | 0.144  | 0.162  | 0.889 | NA    | NA    | NA    | QT      | 0.003 | 0.005 | M    |
| PGS000880 | Lung Carcinoma                                 | 0.171  | 0.166  | 1.033 | 1.187 | 1.180 | 1.006 | Disease | 0.821 | 0.866 | None |
| PGS000882 | Vitamin D Measurement                          | 0.369  | 0.369  | 0.998 | NA    | NA    | NA    | QT      | 0.818 | 0.864 | None |
| PGS000883 | Glomerular Filtration Rate                     | 0.304  | 0.381  | 0.797 | NA    | NA    | NA    | QT      | 0.000 | 0.000 | M    |
| PGS000884 | Glomerular Filtration Rate                     | -0.283 | -0.351 | 0.806 | NA    | NA    | NA    | QT      | 0.000 | 0.000 | M    |
| PGS000885 | Glomerular Filtration Rate                     | -0.174 | -0.201 | 0.865 | NA    | NA    | NA    | QT      | 0.000 | 0.000 | M    |
| PGS000886 | ow-Density Lipoprotein Cholesterol Measuremer  | 0.198  | 0.165  | 1.200 | NA    | NA    | NA    | QT      | 0.000 | 0.000 | F    |
| PGS000887 | ow-Density Lipoprotein Cholesterol Measuremer  | 0.248  | 0.201  | 1.235 | NA    | NA    | NA    | QT      | 0.000 | 0.000 | F    |
| PGS000888 | ow-Density Lipoprotein Cholesterol Measuremer  | 0.316  | 0.266  | 1.187 | NA    | NA    | NA    | QT      | 0.000 | 0.000 | F    |
| PGS000889 | ow-Density Lipoprotein Cholesterol Measuremer  | 0.329  | 0.273  | 1.204 | NA    | NA    | NA    | QT      | 0.000 | 0.000 | F    |
| PGS000890 | ow-Density Lipoprotein Cholesterol Measuremer  | 0.191  | 0.162  | 1.182 | NA    | NA    | NA    | QT      | 0.000 | 0.000 | F    |
| PGS000891 | ow-Density Lipoprotein Cholesterol Measuremer  | 0.200  | 0.162  | 1.234 | NA    | NA    | NA    | QT      | 0.000 | 0.000 | F    |
| PGS000892 | ow-Density Lipoprotein Cholesterol Measuremer  | 0.321  | 0.268  | 1.198 | NA    | NA    | NA    | QT      | 0.000 | 0.000 | F    |
| PGS000893 | ow-Density Lipoprotein Cholesterol Measuremer  | 0.317  | 0.262  | 1.210 | NA    | NA    | NA    | QT      | 0.000 | 0.000 | F    |
| PGS000894 | ow-Density Lipoprotein Cholesterol Measuremer  | 0.173  | 0.157  | 1.104 | NA    | NA    | NA    | QT      | 0.000 | 0.000 | F    |
| PGS000895 | ow-Density Lipoprotein Cholesterol Measuremer  | 0.256  | 0.220  | 1.167 | NA    | NA    | NA    | QT      | 0.000 | 0.000 | F    |
| PGS000896 | ow-Density Lipoprotein Cholesterol Measuremer  | 0.127  | 0.118  | 1.073 | NA    | NA    | NA    | QT      | 0.003 | 0.005 | F    |
| PGS000897 | ow-Density Lipoprotein Cholesterol Measuremer  | 0.234  | 0.200  | 1.169 | NA    | NA    | NA    | QT      | 0.000 | 0.000 | F    |
| PGS000898 | Alzheimer's Disease                            | 0.315  | 0.288  | 1.093 | 1.370 | 1.334 | 1.027 | Disease | 0.449 | 0.549 | None |
| PGS000899 | Coronary Artery Disease                        | 0.287  | 0.402  | 0.714 | 1.333 | 1.495 | 0.891 | Disease | 0.000 | 0.000 | M    |

|           |                                       |        |        |            |       |       |       |         |       |       |      |
|-----------|---------------------------------------|--------|--------|------------|-------|-------|-------|---------|-------|-------|------|
| PGS000902 | Parkinson's Disease                   | 0.367  | 0.335  | 1.095      | 1.444 | 1.398 | 1.032 | Disease | 0.300 | 0.394 | None |
| PGS000903 | Parkinson's Disease                   | 0.410  | 0.389  | 1.055      | 1.508 | 1.476 | 1.021 | Disease | 0.502 | 0.598 | None |
| PGS000908 | Insomnia                              | 0.279  | 0.200  | 1.397      | 1.322 | 1.221 | 1.083 | Disease | 0.000 | 0.000 | F    |
| PGS000910 | Body Mass Index                       | 0.579  | 0.487  | 1.188      | NA    | NA    | NA    | QT      | 0.000 | 0.000 | F    |
| PGS000911 | Stroke                                | 0.058  | 0.077  | 0.756      | 1.060 | 1.080 | 0.981 | Disease | 0.264 | 0.355 | None |
| PGS000912 | Diastolic Blood Pressure              | 0.376  | 0.342  | 1.102      | NA    | NA    | NA    | QT      | 0.000 | 0.000 | F    |
| PGS000913 | Systolic Blood Pressure               | 0.389  | 0.329  | 1.181      | NA    | NA    | NA    | QT      | 0.000 | 0.000 | F    |
| PGS000921 | Body Mass Index                       | 0.574  | 0.482  | 1.193      | NA    | NA    | NA    | QT      | 0.000 | 0.000 | F    |
| PGS000929 | Dementia                              | 0.577  | 0.442  | 1.305      | 1.781 | 1.556 | 1.144 | Disease | 0.000 | 0.000 | F    |
| PGS000936 | Hypercholesterolemia                  | 0.549  | 0.541  | 1.015      | 1.732 | 1.718 | 1.008 | Disease | 0.294 | 0.389 | None |
| PGS000937 | Varicose Veins                        | 0.691  | 0.659  | 1.048      | 1.996 | 1.933 | 1.032 | Disease | 0.044 | 0.071 | F    |
| PGS000938 | Varicose Veins                        | 0.643  | 0.586  | 1.098      | 1.902 | 1.796 | 1.059 | Disease | 0.000 | 0.000 | F    |
| PGS000942 | Cholecystitis                         | 0.349  | 0.287  | 1.216      | 1.418 | 1.333 | 1.064 | Disease | 0.000 | 0.000 | F    |
| PGS000943 | Cholecystitis                         | 0.191  | 0.114  | 1.668      | 1.210 | 1.121 | 1.079 | Disease | 0.000 | 0.000 | F    |
| PGS000945 | Alzheimer's Disease                   | 0.689  | 0.563  | 1.224      | 1.993 | 1.756 | 1.134 | Disease | 0.000 | 0.000 | F    |
| PGS000946 | Dementia                              | 0.576  | 0.439  | 1.311      | 1.779 | 1.552 | 1.146 | Disease | 0.000 | 0.000 | F    |
| PGS000948 | Inguinal Hernia                       | 0.503  | 0.530  | 0.950      | 1.654 | 1.698 | 0.974 | Disease | 0.256 | 0.347 | None |
| PGS000949 | Inguinal Hernia                       | 0.555  | 0.595  | 0.933      | 1.742 | 1.813 | 0.961 | Disease | 0.085 | 0.130 | None |
| PGS000957 | Hypertension                          | 0.638  | 0.615  | 1.037      | 1.893 | 1.850 | 1.023 | Disease | 0.002 | 0.003 | F    |
| PGS000958 | Hypertension                          | 0.614  | 0.590  | 1.040      | 1.847 | 1.804 | 1.024 | Disease | 0.001 | 0.002 | F    |
| PGS000962 | Coronary Artery Disease               | 0.373  | 0.492  | 0.758      | 1.453 | 1.636 | 0.888 | Disease | 0.000 | 0.000 | M    |
| PGS000965 | Hypothyroidism                        | 0.903  | 0.836  | 1.081      | 2.468 | 2.306 | 1.070 | Disease | 0.000 | 0.000 | F    |
| PGS000967 | Osteoarthritis                        | 0.099  | 0.102  | 0.971      | 1.104 | 1.107 | 0.997 | Disease | 0.667 | 0.746 | None |
| PGS000972 | Urinary Microalbumin Measurement      | 0.024  | 0.049  | 0.477      | NA    | NA    | NA    | QT      | 0.000 | 0.000 | M    |
| PGS000987 | Mean Reticulocyte Volume              | 0.434  | 0.438  | 0.990      | NA    | NA    | NA    | QT      | 0.103 | 0.156 | None |
| PGS000988 | Reticulocyte Measurement              | 0.209  | 0.233  | 0.896      | NA    | NA    | NA    | QT      | 0.000 | 0.000 | M    |
| PGS000989 | Reticulocyte Measurement              | 0.230  | 0.259  | 0.888      | NA    | NA    | NA    | QT      | 0.000 | 0.000 | M    |
| PGS000997 | Diverticular Disease                  | 0.531  | 0.514  | 1.033      | 1.701 | 1.673 | 1.017 | Disease | 0.053 | 0.084 | None |
| PGS001002 | Whole-Body Water Mass                 | 0.212  | 0.375  | 0.564      | NA    | NA    | NA    | QT      | 0.000 | 0.000 | M    |
| PGS001006 | Body Weight                           | 0.094  | 0.091  | 1.035      | NA    | NA    | NA    | QT      | 0.215 | 0.297 | None |
| PGS001009 | Peak Expiratory Flow                  | 0.155  | 0.271  | 0.571      | NA    | NA    | NA    | QT      | 0.000 | 0.000 | M    |
| PGS001010 | Peak Expiratory Flow                  | 0.079  | 0.144  | 0.551      | NA    | NA    | NA    | QT      | 0.000 | 0.000 | M    |
| PGS001037 | Bone Density                          | 0.429  | 0.515  | 0.834      | NA    | NA    | NA    | QT      | 0.000 | 0.000 | M    |
| PGS001038 | Bone Density                          | 0.328  | 0.356  | 0.922      | NA    | NA    | NA    | QT      | 0.000 | 0.000 | M    |
| PGS001039 | Bone Density                          | 0.330  | 0.360  | 0.917      | NA    | NA    | NA    | QT      | 0.000 | 0.000 | M    |
| PGS001040 | Melanoma                              | 0.221  | 0.250  | 0.885      | 1.247 | 1.284 | 0.972 | Disease | 0.268 | 0.360 | None |
| PGS001041 | Skin Carcinoma                        | 0.502  | 0.510  | 0.984      | 1.651 | 1.665 | 0.992 | Disease | 0.470 | 0.569 | None |
| PGS001046 | Smoking Status Measurement            | -0.016 | 0.000  | -14406.797 | NA    | NA    | NA    | QT      | 0.125 | 0.185 | None |
| PGS001047 | Smoking Status Measurement            | -0.065 | -0.072 | 0.903      | NA    | NA    | NA    | QT      | 0.494 | 0.590 | None |
| PGS001048 | Coronary Artery Disease               | 0.152  | 0.194  | 0.782      | 1.164 | 1.214 | 0.959 | Disease | 0.000 | 0.000 | M    |
| PGS001076 | Eosinophil Percentage of Leukocytes   | 0.354  | 0.403  | 0.877      | NA    | NA    | NA    | QT      | 0.000 | 0.000 | M    |
| PGS001077 | Neutrophil Percentage of Leukocytes   | 0.353  | 0.362  | 0.976      | NA    | NA    | NA    | QT      | 0.001 | 0.003 | M    |
| PGS001078 | Monocyte Percentage of Leukocytes     | 0.314  | 0.362  | 0.869      | NA    | NA    | NA    | QT      | 0.000 | 0.000 | M    |
| PGS001079 | Platelet Component Distribution Width | 0.496  | 0.527  | 0.940      | NA    | NA    | NA    | QT      | 0.000 | 0.000 | M    |
| PGS001086 | Alcohol Consumption Measurement       | 0.061  | 0.106  | 0.576      | NA    | NA    | NA    | QT      | 0.000 | 0.000 | M    |
| PGS001087 | Alcohol Consumption Measurement       | 0.112  | 0.155  | 0.727      | NA    | NA    | NA    | QT      | 0.000 | 0.000 | M    |
| PGS001088 | Alcohol Consumption Measurement       | 0.019  | 0.079  | 0.237      | NA    | NA    | NA    | QT      | 0.000 | 0.000 | M    |
| PGS001101 | Fat Body Mass                         | 0.364  | 0.289  | 1.259      | NA    | NA    | NA    | QT      | 0.000 | 0.000 | F    |
| PGS001102 | Fat Body Mass                         | 0.352  | 0.257  | 1.369      | NA    | NA    | NA    | QT      | 0.000 | 0.000 | F    |
| PGS001103 | Fat Body Mass                         | 0.341  | 0.280  | 1.216      | NA    | NA    | NA    | QT      | 0.000 | 0.000 | F    |
| PGS001104 | Fat Body Mass                         | 0.336  | 0.279  | 1.201      | NA    | NA    | NA    | QT      | 0.000 | 0.000 | F    |
| PGS001105 | Fat Body Mass                         | 0.354  | 0.282  | 1.258      | NA    | NA    | NA    | QT      | 0.000 | 0.000 | F    |
| PGS001106 | Fat Body Mass                         | 0.350  | 0.247  | 1.416      | NA    | NA    | NA    | QT      | 0.000 | 0.000 | F    |
| PGS001108 | Basal Metabolic Rate Measurement      | 0.230  | 0.409  | 0.562      | NA    | NA    | NA    | QT      | 0.000 | 0.000 | M    |
| PGS001119 | Grip Strength Measurement             | 0.151  | 0.266  | 0.567      | NA    | NA    | NA    | QT      | 0.000 | 0.000 | M    |
| PGS001120 | Grip Strength Measurement             | 0.132  | 0.230  | 0.575      | NA    | NA    | NA    | QT      | 0.000 | 0.000 | M    |

|           |                                           |        |        |        |       |       |       |         |       |       |      |
|-----------|-------------------------------------------|--------|--------|--------|-------|-------|-------|---------|-------|-------|------|
| PGS001127 | Smoking Status Measurement                | -0.011 | -0.013 | 0.839  | NA    | NA    | NA    | QT      | 0.834 | 0.876 | None |
| PGS001128 | Smoking Status Measurement                | -0.013 | -0.008 | 1.724  | NA    | NA    | NA    | QT      | 0.589 | 0.677 | None |
| PGS001129 | Smoking Status Measurement                | -0.007 | 0.001  | -7.111 | NA    | NA    | NA    | QT      | 0.429 | 0.531 | None |
| PGS001133 | Diastolic Blood Pressure                  | 0.337  | 0.301  | 1.119  | NA    | NA    | NA    | QT      | 0.000 | 0.000 | F    |
| PGS001134 | Systolic Blood Pressure                   | 0.341  | 0.294  | 1.160  | NA    | NA    | NA    | QT      | 0.000 | 0.000 | F    |
| PGS001144 | Fat Body Mass                             | 0.322  | 0.226  | 1.423  | NA    | NA    | NA    | QT      | 0.000 | 0.000 | F    |
| PGS001145 | Fat Body Mass                             | 0.322  | 0.226  | 1.426  | NA    | NA    | NA    | QT      | 0.000 | 0.000 | F    |
| PGS001146 | Fat Body Mass                             | 0.147  | 0.099  | 1.477  | NA    | NA    | NA    | QT      | 0.000 | 0.000 | F    |
| PGS001147 | Fat Body Mass                             | 0.326  | 0.240  | 1.357  | NA    | NA    | NA    | QT      | 0.000 | 0.000 | F    |
| PGS001148 | Fat Body Mass                             | 0.347  | 0.270  | 1.283  | NA    | NA    | NA    | QT      | 0.000 | 0.000 | F    |
| PGS001149 | Fat Body Mass                             | 0.348  | 0.261  | 1.331  | NA    | NA    | NA    | QT      | 0.000 | 0.000 | F    |
| PGS001152 | Red Blood Cell Distribution Width         | 0.355  | 0.303  | 1.173  | NA    | NA    | NA    | QT      | 0.000 | 0.000 | F    |
| PGS001162 | Waist Hip Ratio                           | 0.060  | 0.119  | 0.500  | NA    | NA    | NA    | QT      | 0.000 | 0.000 | M    |
| PGS001163 | Monocyte Count                            | 0.314  | 0.363  | 0.865  | NA    | NA    | NA    | QT      | 0.000 | 0.000 | M    |
| PGS001172 | Eosinophil Count                          | 0.343  | 0.395  | 0.870  | NA    | NA    | NA    | QT      | 0.000 | 0.000 | M    |
| PGS001173 | Neutrophil Count                          | 0.378  | 0.382  | 0.989  | NA    | NA    | NA    | QT      | 0.133 | 0.197 | None |
| PGS001174 | Cholecystitis                             | 0.408  | 0.349  | 1.167  | 1.503 | 1.418 | 1.060 | Disease | 0.001 | 0.001 | F    |
| PGS001181 | Hypothyroidism                            | 0.913  | 0.837  | 1.091  | 2.493 | 2.310 | 1.079 | Disease | 0.000 | 0.000 | F    |
| PGS001182 | Estradiol Measurement                     | 0.029  | 0.007  | 4.084  | NA    | NA    | NA    | QT      | 0.000 | 0.000 | F    |
| PGS001185 | Intraocular Pressure Measurement          | 0.169  | 0.195  | 0.867  | NA    | NA    | NA    | QT      | 0.000 | 0.000 | M    |
| PGS001192 | Osteoarthritis                            | 0.220  | 0.271  | 0.811  | 1.246 | 1.311 | 0.950 | Disease | 0.000 | 0.000 | M    |
| PGS001199 | Lymphocyte Count                          | 0.185  | 0.222  | 0.833  | NA    | NA    | NA    | QT      | 0.000 | 0.000 | M    |
| PGS001200 | Mean Platelet Volume                      | 0.641  | 0.626  | 1.024  | NA    | NA    | NA    | QT      | 0.000 | 0.000 | F    |
| PGS001218 | Mean Corpuscular Hemoglobin Concentration | 0.177  | 0.179  | 0.988  | NA    | NA    | NA    | QT      | 0.446 | 0.547 | None |
| PGS001219 | Mean Corpuscular Hemoglobin               | 0.423  | 0.415  | 1.020  | NA    | NA    | NA    | QT      | 0.001 | 0.002 | F    |
| PGS001220 | Mean Corpuscular Volume                   | 0.469  | 0.458  | 1.024  | NA    | NA    | NA    | QT      | 0.000 | 0.000 | F    |
| PGS001226 | Birth Weight                              | 0.283  | 0.301  | 0.939  | NA    | NA    | NA    | QT      | 0.000 | 0.000 | M    |
| PGS001227 | Waist Hip Ratio                           | 0.217  | 0.227  | 0.957  | NA    | NA    | NA    | QT      | 0.000 | 0.000 | M    |
| PGS001228 | Body Mass Index                           | 0.499  | 0.394  | 1.267  | NA    | NA    | NA    | QT      | 0.000 | 0.000 | F    |
| PGS001229 | Body Height                               | 0.456  | 0.501  | 0.910  | NA    | NA    | NA    | QT      | 0.000 | 0.000 | M    |
| PGS001230 | Body Weight                               | 0.420  | 0.443  | 0.949  | NA    | NA    | NA    | QT      | 0.000 | 0.000 | M    |
| PGS001236 | Forced Expiratory Volume                  | 0.220  | 0.352  | 0.625  | NA    | NA    | NA    | QT      | 0.000 | 0.000 | M    |
| PGS001238 | Platelet Count                            | 0.555  | 0.496  | 1.119  | NA    | NA    | NA    | QT      | 0.000 | 0.000 | F    |
| PGS001239 | Leukocyte Count                           | 0.345  | 0.367  | 0.939  | NA    | NA    | NA    | QT      | 0.000 | 0.000 | M    |
| PGS001240 | Erythrocyte Count                         | 0.378  | 0.416  | 0.910  | NA    | NA    | NA    | QT      | 0.000 | 0.000 | M    |
| PGS001248 | Gout                                      | 0.481  | 0.602  | 0.799  | 1.618 | 1.826 | 0.886 | Disease | 0.000 | 0.000 | M    |
| PGS001249 | Gout                                      | 0.540  | 0.671  | 0.805  | 1.716 | 1.956 | 0.877 | Disease | 0.000 | 0.000 | M    |
| PGS001260 | Coronary Artery Disease                   | 0.343  | 0.424  | 0.808  | 1.409 | 1.529 | 0.922 | Disease | 0.000 | 0.000 | M    |
| PGS001261 | Coronary Artery Disease                   | 0.342  | 0.426  | 0.803  | 1.408 | 1.531 | 0.920 | Disease | 0.000 | 0.000 | M    |
| PGS001262 | Coronary Artery Disease                   | 0.277  | 0.347  | 0.799  | 1.320 | 1.415 | 0.932 | Disease | 0.000 | 0.000 | M    |
| PGS001263 | Atrial Fibrillation                       | 0.483  | 0.544  | 0.888  | 1.621 | 1.722 | 0.941 | Disease | 0.000 | 0.000 | M    |
| PGS001267 | Ankylosing Spondylitis                    | 0.562  | 0.742  | 0.757  | 1.754 | 2.101 | 0.835 | Disease | 0.000 | 0.000 | M    |
| PGS001268 | Ankylosing Spondylitis                    | 0.563  | 0.743  | 0.758  | 1.756 | 2.102 | 0.835 | Disease | 0.000 | 0.000 | M    |
| PGS001270 | Multiple Sclerosis                        | 0.468  | 0.357  | 1.311  | 1.597 | 1.429 | 1.117 | Disease | 0.033 | 0.054 | F    |
| PGS001271 | Multiple Sclerosis                        | 0.464  | 0.358  | 1.295  | 1.590 | 1.431 | 1.111 | Disease | 0.042 | 0.068 | F    |
| PGS001272 | Chronic Kidney Disease                    | 0.185  | 0.159  | 1.166  | 1.203 | 1.172 | 1.027 | Disease | 0.048 | 0.077 | F    |
| PGS001273 | Osteoporosis                              | 0.278  | 0.216  | 1.286  | 1.320 | 1.241 | 1.064 | Disease | 0.001 | 0.001 | F    |
| PGS001274 | Osteoporosis                              | 0.388  | 0.318  | 1.220  | 1.475 | 1.375 | 1.073 | Disease | 0.000 | 0.000 | F    |
| PGS001280 | Pulmonary Embolism                        | 0.311  | 0.364  | 0.854  | 1.364 | 1.439 | 0.948 | Disease | 0.006 | 0.011 | M    |
| PGS001281 | Migraine Disorder                         | 0.118  | 0.101  | 1.173  | 1.125 | 1.106 | 1.018 | Disease | 0.507 | 0.602 | None |
| PGS001282 | Migraine Disorder                         | 0.230  | 0.180  | 1.276  | 1.259 | 1.198 | 1.051 | Disease | 0.058 | 0.092 | None |
| PGS001287 | Psoriasis                                 | 0.357  | 0.380  | 0.938  | 1.428 | 1.463 | 0.977 | Disease | 0.329 | 0.425 | None |
| PGS001288 | Inflammatory Bowel Disease                | 0.396  | 0.405  | 0.978  | 1.486 | 1.499 | 0.991 | Disease | 0.680 | 0.755 | None |
| PGS001289 | Thyroid Carcinoma                         | 0.273  | 0.471  | 0.581  | 1.314 | 1.601 | 0.821 | Disease | 0.012 | 0.020 | M    |
| PGS001290 | Osteoarthritis                            | 0.146  | 0.134  | 1.091  | 1.158 | 1.144 | 1.012 | Disease | 0.081 | 0.125 | None |
| PGS001294 | Type 2 Diabetes Mellitus                  | 0.621  | 0.646  | 0.960  | 1.860 | 1.909 | 0.975 | Disease | 0.018 | 0.031 | M    |

|           |                                            |        |        |       |       |       |       |         |       |       |      |
|-----------|--------------------------------------------|--------|--------|-------|-------|-------|-------|---------|-------|-------|------|
| PGS001295 | Type 2 Diabetes Mellitus                   | 0.240  | 0.236  | 1.019 | 1.272 | 1.266 | 1.004 | Disease | 0.668 | 0.746 | None |
| PGS001296 | Type 1 Diabetes Mellitus                   | 0.699  | 0.581  | 1.203 | 2.012 | 1.788 | 1.125 | Disease | 0.000 | 0.000 | F    |
| PGS001297 | Type 1 Diabetes Mellitus                   | 0.555  | 0.442  | 1.257 | 1.742 | 1.555 | 1.120 | Disease | 0.000 | 0.000 | F    |
| PGS001298 | Obesity                                    | 0.543  | 0.523  | 1.038 | 1.721 | 1.687 | 1.020 | Disease | 0.071 | 0.111 | None |
| PGS001301 | Celiac Disease                             | 1.159  | 1.155  | 1.003 | 3.187 | 3.174 | 1.004 | Disease | 0.902 | 0.934 | None |
| PGS001302 | Cataract                                   | 0.250  | 0.284  | 0.878 | 1.283 | 1.329 | 0.966 | Disease | 0.000 | 0.000 | M    |
| PGS001303 | Cataract                                   | 0.171  | 0.186  | 0.917 | 1.186 | 1.205 | 0.985 | Disease | 0.078 | 0.121 | None |
| PGS001304 | Melanoma                                   | 0.326  | 0.281  | 1.159 | 1.385 | 1.324 | 1.046 | Disease | 0.069 | 0.107 | None |
| PGS001306 | Ulcerative Colitis                         | 0.489  | 0.469  | 1.043 | 1.631 | 1.599 | 1.020 | Disease | 0.463 | 0.563 | None |
| PGS001307 | Ulcerative Colitis                         | 0.706  | 0.691  | 1.021 | 2.026 | 1.996 | 1.015 | Disease | 0.597 | 0.684 | None |
| PGS001309 | Rheumatoid Arthritis                       | 0.395  | 0.386  | 1.021 | 1.484 | 1.472 | 1.008 | Disease | 0.706 | 0.776 | None |
| PGS001310 | Rheumatoid Arthritis                       | 0.365  | 0.349  | 1.043 | 1.440 | 1.418 | 1.015 | Disease | 0.481 | 0.579 | None |
| PGS001311 | Rheumatoid Arthritis                       | 0.150  | 0.140  | 1.072 | 1.162 | 1.151 | 1.010 | Disease | 0.646 | 0.727 | None |
| PGS001312 | Psoriasis                                  | 0.480  | 0.534  | 0.898 | 1.616 | 1.706 | 0.947 | Disease | 0.031 | 0.051 | M    |
| PGS001313 | Psoriasis                                  | 0.574  | 0.622  | 0.923 | 1.776 | 1.863 | 0.953 | Disease | 0.058 | 0.092 | None |
| PGS001314 | Coronary Artery Disease                    | 0.249  | 0.359  | 0.694 | 1.283 | 1.432 | 0.896 | Disease | 0.000 | 0.000 | M    |
| PGS001315 | Coronary Artery Disease                    | 0.290  | 0.400  | 0.725 | 1.337 | 1.492 | 0.896 | Disease | 0.000 | 0.000 | M    |
| PGS001316 | Coronary Artery Disease                    | 0.289  | 0.403  | 0.718 | 1.335 | 1.496 | 0.893 | Disease | 0.000 | 0.000 | M    |
| PGS001317 | Coronary Artery Disease                    | 0.223  | 0.315  | 0.707 | 1.250 | 1.371 | 0.912 | Disease | 0.000 | 0.000 | M    |
| PGS001320 | Hypertension                               | 0.668  | 0.622  | 1.075 | 1.951 | 1.862 | 1.048 | Disease | 0.000 | 0.000 | F    |
| PGS001321 | Glaucoma                                   | 0.396  | 0.436  | 0.908 | 1.486 | 1.547 | 0.961 | Disease | 0.024 | 0.041 | M    |
| PGS001322 | Glaucoma                                   | 0.432  | 0.444  | 0.973 | 1.541 | 1.559 | 0.988 | Disease | 0.507 | 0.602 | None |
| PGS001323 | Glaucoma                                   | 0.595  | 0.615  | 0.967 | 1.812 | 1.849 | 0.980 | Disease | 0.268 | 0.360 | None |
| PGS001327 | Type 2 Diabetes Mellitus                   | 0.638  | 0.664  | 0.960 | 1.892 | 1.943 | 0.974 | Disease | 0.015 | 0.025 | M    |
| PGS001329 | Type 2 Diabetes Mellitus                   | 0.487  | 0.520  | 0.936 | 1.627 | 1.682 | 0.967 | Disease | 0.002 | 0.003 | M    |
| PGS001330 | Crohn's Disease                            | 0.508  | 0.525  | 0.968 | 1.662 | 1.690 | 0.983 | Disease | 0.642 | 0.724 | None |
| PGS001331 | Crohn's Disease                            | 0.522  | 0.552  | 0.945 | 1.685 | 1.737 | 0.970 | Disease | 0.410 | 0.513 | None |
| PGS001332 | Chronic Obstructive Pulmonary Disease      | 0.228  | 0.258  | 0.881 | 1.256 | 1.295 | 0.970 | Disease | 0.032 | 0.053 | M    |
| PGS001333 | Chronic Obstructive Pulmonary Disease      | 0.277  | 0.302  | 0.919 | 1.320 | 1.352 | 0.976 | Disease | 0.089 | 0.137 | None |
| PGS001334 | Chronic Obstructive Pulmonary Disease      | 0.235  | 0.264  | 0.892 | 1.265 | 1.302 | 0.972 | Disease | 0.047 | 0.075 | M    |
| PGS001339 | Atrial Fibrillation                        | 0.490  | 0.553  | 0.885 | 1.632 | 1.739 | 0.938 | Disease | 0.000 | 0.000 | M    |
| PGS001340 | Atrial Fibrillation                        | 0.522  | 0.589  | 0.886 | 1.685 | 1.802 | 0.935 | Disease | 0.000 | 0.000 | M    |
| PGS001341 | Asthma                                     | 0.572  | 0.646  | 0.885 | 1.771 | 1.908 | 0.928 | Disease | 0.000 | 0.000 | M    |
| PGS001343 | Asthma                                     | 0.572  | 0.646  | 0.886 | 1.771 | 1.907 | 0.929 | Disease | 0.000 | 0.000 | M    |
| PGS001344 | Asthma                                     | 0.521  | 0.602  | 0.866 | 1.683 | 1.825 | 0.922 | Disease | 0.000 | 0.000 | M    |
| PGS001345 | Asthma                                     | 0.217  | 0.272  | 0.796 | 1.242 | 1.313 | 0.946 | Disease | 0.000 | 0.000 | M    |
| PGS001346 | Asthma                                     | 0.622  | 0.690  | 0.901 | 1.863 | 1.994 | 0.934 | Disease | 0.000 | 0.000 | M    |
| PGS001348 | Alzheimer's Disease                        | 0.687  | 0.564  | 1.218 | 1.988 | 1.758 | 1.131 | Disease | 0.000 | 0.000 | F    |
| PGS001349 | Alzheimer's Disease                        | 0.688  | 0.563  | 1.221 | 1.990 | 1.756 | 1.133 | Disease | 0.000 | 0.000 | F    |
| PGS001352 | HbA1c Measurement                          | 0.152  | 0.176  | 0.865 | NA    | NA    | NA    | QT      | 0.000 | 0.000 | M    |
| PGS001353 | Parkinson's Disease                        | 0.109  | 0.077  | 1.425 | 1.116 | 1.080 | 1.033 | Disease | 0.297 | 0.391 | None |
| PGS001354 | Thyroid Carcinoma                          | 0.401  | 0.510  | 0.786 | 1.493 | 1.666 | 0.896 | Disease | 0.167 | 0.238 | None |
| PGS001355 | Coronary Artery Disease                    | 0.324  | 0.438  | 0.740 | 1.383 | 1.550 | 0.893 | Disease | 0.000 | 0.000 | M    |
| PGS001356 | Atrial Fibrillation                        | 0.412  | 0.441  | 0.935 | 1.510 | 1.554 | 0.972 | Disease | 0.010 | 0.017 | M    |
| PGS001357 | Type 2 Diabetes Mellitus                   | 0.499  | 0.484  | 1.032 | 1.648 | 1.622 | 1.016 | Disease | 0.146 | 0.213 | None |
| PGS001370 | Asthma                                     | -0.129 | -0.186 | 0.694 | 0.879 | 0.831 | 1.058 | Disease | 0.000 | 0.000 | M    |
| PGS001377 | Basophil Percentage of Leukocytes          | 0.206  | 0.145  | 1.426 | NA    | NA    | NA    | QT      | 0.000 | 0.000 | F    |
| PGS001378 | Basophil Count                             | 0.196  | 0.147  | 1.331 | NA    | NA    | NA    | QT      | 0.000 | 0.000 | F    |
| PGS001388 | Smoking Status Measurement                 | 0.066  | 0.074  | 0.883 | NA    | NA    | NA    | QT      | 0.394 | 0.496 | None |
| PGS001394 | Alcohol Consumption Measurement            | 0.043  | 0.079  | 0.545 | NA    | NA    | NA    | QT      | 0.000 | 0.000 | M    |
| PGS001402 | Bone Density                               | 0.428  | 0.513  | 0.835 | NA    | NA    | NA    | QT      | 0.000 | 0.000 | M    |
| PGS001403 | Bone Density                               | 0.326  | 0.355  | 0.919 | NA    | NA    | NA    | QT      | 0.000 | 0.000 | M    |
| PGS001404 | Bone Density                               | 0.331  | 0.361  | 0.916 | NA    | NA    | NA    | QT      | 0.000 | 0.000 | M    |
| PGS001405 | Body Height                                | 0.227  | 0.249  | 0.914 | NA    | NA    | NA    | QT      | 0.000 | 0.000 | M    |
| PGS001406 | Reticulocyte Measurement                   | 0.259  | 0.295  | 0.875 | NA    | NA    | NA    | QT      | 0.000 | 0.000 | M    |
| PGS001408 | Immature Reticulocyte Fraction Measurement | 0.363  | 0.360  | 1.006 | NA    | NA    | NA    | QT      | 0.395 | 0.497 | None |

|           |                                                |        |        |        |    |    |    |    |       |       |      |
|-----------|------------------------------------------------|--------|--------|--------|----|----|----|----|-------|-------|------|
| PGS001409 | Intraocular Pressure Measurement               | 0.192  | 0.201  | 0.955  | NA | NA | NA | QT | 0.124 | 0.184 | None |
| PGS001410 | Intraocular Pressure Measurement               | 0.152  | 0.171  | 0.888  | NA | NA | NA | QT | 0.001 | 0.002 | M    |
| PGS001411 | Intraocular Pressure Measurement               | 0.210  | 0.227  | 0.923  | NA | NA | NA | QT | 0.003 | 0.006 | M    |
| PGS001412 | Left Ventricular Ejection Fraction Measurement | 0.120  | 0.113  | 1.060  | NA | NA | NA | QT | 0.810 | 0.858 | None |
| PGS001414 | Lymphocyte Percentage of Leukocytes            | 0.375  | 0.370  | 1.014  | NA | NA | NA | QT | 0.046 | 0.074 | F    |
| PGS001415 | Brain Volume Measurement (Neuroimaging)        | 0.015  | 0.026  | 0.563  | NA | NA | NA | QT | 0.125 | 0.185 | None |
| PGS001416 | Brain Volume Measurement (Neuroimaging)        | 0.015  | 0.018  | 0.821  | NA | NA | NA | QT | 0.666 | 0.745 | None |
| PGS001417 | Brain Volume Measurement (Neuroimaging)        | 0.015  | 0.020  | 0.732  | NA | NA | NA | QT | 0.467 | 0.566 | None |
| PGS001418 | Brain Volume Measurement (Neuroimaging)        | 0.028  | 0.027  | 1.028  | NA | NA | NA | QT | 0.918 | 0.946 | None |
| PGS001419 | Brain Volume Measurement (Neuroimaging)        | 0.036  | 0.032  | 1.130  | NA | NA | NA | QT | 0.585 | 0.672 | None |
| PGS001420 | Brain Volume Measurement (Neuroimaging)        | 0.024  | 0.024  | 0.990  | NA | NA | NA | QT | 0.975 | 0.982 | None |
| PGS001421 | Brain Volume Measurement (Neuroimaging)        | 0.022  | 0.037  | 0.584  | NA | NA | NA | QT | 0.040 | 0.065 | M    |
| PGS001422 | Brain Volume Measurement (Neuroimaging)        | 0.042  | 0.053  | 0.788  | NA | NA | NA | QT | 0.131 | 0.193 | None |
| PGS001423 | Brain Volume Measurement (Neuroimaging)        | 0.029  | 0.025  | 1.157  | NA | NA | NA | QT | 0.603 | 0.689 | None |
| PGS001424 | Brain Volume Measurement (Neuroimaging)        | 0.039  | 0.042  | 0.924  | NA | NA | NA | QT | 0.672 | 0.749 | None |
| PGS001425 | Brain Volume Measurement (Neuroimaging)        | 0.051  | 0.064  | 0.809  | NA | NA | NA | QT | 0.105 | 0.158 | None |
| PGS001426 | Brain Volume Measurement (Neuroimaging)        | 0.003  | -0.008 | -0.388 | NA | NA | NA | QT | 0.144 | 0.210 | None |
| PGS001427 | Brain Volume Measurement (Neuroimaging)        | 0.017  | 0.031  | 0.548  | NA | NA | NA | QT | 0.062 | 0.098 | None |
| PGS001428 | Brain Volume Measurement (Neuroimaging)        | 0.022  | 0.034  | 0.636  | NA | NA | NA | QT | 0.094 | 0.144 | None |
| PGS001429 | Brain Volume Measurement (Neuroimaging)        | 0.032  | 0.025  | 1.284  | NA | NA | NA | QT | 0.343 | 0.440 | None |
| PGS001430 | Brain Volume Measurement (Neuroimaging)        | 0.002  | 0.011  | 0.184  | NA | NA | NA | QT | 0.231 | 0.316 | None |
| PGS001431 | Brain Volume Measurement (Neuroimaging)        | 0.011  | 0.018  | 0.621  | NA | NA | NA | QT | 0.357 | 0.456 | None |
| PGS001432 | Brain Volume Measurement (Neuroimaging)        | -0.021 | -0.016 | 1.266  | NA | NA | NA | QT | 0.564 | 0.655 | None |
| PGS001433 | Brain Volume Measurement (Neuroimaging)        | -0.019 | -0.015 | 1.237  | NA | NA | NA | QT | 0.631 | 0.715 | None |
| PGS001434 | Brain Volume Measurement (Neuroimaging)        | 0.008  | 0.013  | 0.589  | NA | NA | NA | QT | 0.481 | 0.579 | None |
| PGS001435 | Brain Volume Measurement (Neuroimaging)        | -0.007 | 0.010  | -0.707 | NA | NA | NA | QT | 0.030 | 0.050 | M    |
| PGS001436 | Brain Volume Measurement (Neuroimaging)        | -0.008 | -0.008 | 0.969  | NA | NA | NA | QT | 0.973 | 0.982 | None |
| PGS001437 | Brain Volume Measurement (Neuroimaging)        | -0.015 | -0.014 | 1.069  | NA | NA | NA | QT | 0.901 | 0.933 | None |
| PGS001438 | Brain Volume Measurement (Neuroimaging)        | -0.021 | -0.017 | 1.224  | NA | NA | NA | QT | 0.615 | 0.701 | None |
| PGS001439 | Brain Volume Measurement (Neuroimaging)        | 0.059  | 0.065  | 0.915  | NA | NA | NA | QT | 0.460 | 0.561 | None |
| PGS001440 | Brain Volume Measurement (Neuroimaging)        | 0.062  | 0.070  | 0.888  | NA | NA | NA | QT | 0.296 | 0.390 | None |
| PGS001441 | Brain Volume Measurement (Neuroimaging)        | 0.006  | 0.016  | 0.392  | NA | NA | NA | QT | 0.184 | 0.260 | None |
| PGS001442 | Brain Volume Measurement (Neuroimaging)        | 0.017  | 0.022  | 0.763  | NA | NA | NA | QT | 0.486 | 0.584 | None |
| PGS001443 | Brain Volume Measurement (Neuroimaging)        | 0.035  | 0.035  | 1.001  | NA | NA | NA | QT | 0.998 | 0.998 | None |
| PGS001444 | Brain Volume Measurement (Neuroimaging)        | 0.019  | 0.019  | 0.999  | NA | NA | NA | QT | 0.998 | 0.998 | None |
| PGS001445 | Brain Volume Measurement (Neuroimaging)        | 0.006  | -0.001 | -6.401 | NA | NA | NA | QT | 0.388 | 0.490 | None |
| PGS001446 | Brain Volume Measurement (Neuroimaging)        | 0.014  | 0.002  | 8.609  | NA | NA | NA | QT | 0.110 | 0.165 | None |
| PGS001447 | Brain Volume Measurement (Neuroimaging)        | -0.019 | -0.013 | 1.467  | NA | NA | NA | QT | 0.416 | 0.518 | None |
| PGS001448 | Brain Volume Measurement (Neuroimaging)        | -0.027 | -0.019 | 1.429  | NA | NA | NA | QT | 0.273 | 0.365 | None |
| PGS001449 | Brain Volume Measurement (Neuroimaging)        | 0.022  | 0.013  | 1.684  | NA | NA | NA | QT | 0.236 | 0.323 | None |
| PGS001450 | Brain Volume Measurement (Neuroimaging)        | -0.026 | -0.022 | 1.191  | NA | NA | NA | QT | 0.579 | 0.668 | None |
| PGS001451 | Brain Volume Measurement (Neuroimaging)        | -0.025 | -0.021 | 1.170  | NA | NA | NA | QT | 0.632 | 0.715 | None |
| PGS001452 | Brain Volume Measurement (Neuroimaging)        | -0.011 | 0.002  | -5.787 | NA | NA | NA | QT | 0.085 | 0.130 | None |
| PGS001453 | Brain Volume Measurement (Neuroimaging)        | 0.010  | 0.022  | 0.439  | NA | NA | NA | QT | 0.103 | 0.155 | None |
| PGS001454 | Brain Volume Measurement (Neuroimaging)        | -0.023 | -0.028 | 0.825  | NA | NA | NA | QT | 0.518 | 0.613 | None |
| PGS001455 | Brain Volume Measurement (Neuroimaging)        | -0.015 | -0.009 | 1.816  | NA | NA | NA | QT | 0.353 | 0.452 | None |
| PGS001456 | Brain Volume Measurement (Neuroimaging)        | -0.012 | -0.004 | 2.784  | NA | NA | NA | QT | 0.294 | 0.389 | None |
| PGS001457 | Brain Volume Measurement (Neuroimaging)        | 0.000  | 0.020  | -0.002 | NA | NA | NA | QT | 0.008 | 0.015 | M    |
| PGS001458 | Brain Volume Measurement (Neuroimaging)        | 0.009  | 0.024  | 0.375  | NA | NA | NA | QT | 0.043 | 0.070 | M    |
| PGS001459 | Brain Volume Measurement (Neuroimaging)        | -0.007 | 0.008  | -0.837 | NA | NA | NA | QT | 0.048 | 0.078 | M    |
| PGS001460 | Brain Volume Measurement (Neuroimaging)        | 0.004  | 0.018  | 0.229  | NA | NA | NA | QT | 0.067 | 0.105 | None |
| PGS001461 | Brain Volume Measurement (Neuroimaging)        | -0.005 | 0.016  | -0.311 | NA | NA | NA | QT | 0.006 | 0.010 | M    |
| PGS001462 | Brain Volume Measurement (Neuroimaging)        | -0.005 | 0.017  | -0.276 | NA | NA | NA | QT | 0.005 | 0.009 | M    |
| PGS001463 | Brain Volume Measurement (Neuroimaging)        | -0.007 | 0.003  | -2.209 | NA | NA | NA | QT | 0.181 | 0.256 | None |
| PGS001464 | Brain Volume Measurement (Neuroimaging)        | -0.008 | -0.003 | 2.448  | NA | NA | NA | QT | 0.544 | 0.637 | None |
| PGS001465 | Brain Volume Measurement (Neuroimaging)        | -0.011 | -0.011 | 1.031  | NA | NA | NA | QT | 0.965 | 0.977 | None |

|           |                                         |        |        |        |       |       |       |         |       |       |      |
|-----------|-----------------------------------------|--------|--------|--------|-------|-------|-------|---------|-------|-------|------|
| PGS001466 | Brain Volume Measurement (Neuroimaging) | -0.025 | -0.024 | 1.063  | NA    | NA    | NA    | QT      | 0.840 | 0.881 | None |
| PGS001467 | Brain Volume Measurement (Neuroimaging) | -0.017 | -0.016 | 1.061  | NA    | NA    | NA    | QT      | 0.899 | 0.932 | None |
| PGS001468 | Brain Volume Measurement (Neuroimaging) | -0.014 | -0.017 | 0.810  | NA    | NA    | NA    | QT      | 0.668 | 0.746 | None |
| PGS001469 | Brain Volume Measurement (Neuroimaging) | 0.021  | 0.041  | 0.525  | NA    | NA    | NA    | QT      | 0.010 | 0.017 | M    |
| PGS001470 | Brain Volume Measurement (Neuroimaging) | 0.017  | 0.035  | 0.501  | NA    | NA    | NA    | QT      | 0.021 | 0.035 | M    |
| PGS001471 | Brain Volume Measurement (Neuroimaging) | 0.002  | 0.008  | 0.204  | NA    | NA    | NA    | QT      | 0.390 | 0.492 | None |
| PGS001472 | Brain Volume Measurement (Neuroimaging) | -0.035 | -0.038 | 0.938  | NA    | NA    | NA    | QT      | 0.757 | 0.815 | None |
| PGS001473 | Brain Volume Measurement (Neuroimaging) | -0.031 | -0.035 | 0.871  | NA    | NA    | NA    | QT      | 0.545 | 0.637 | None |
| PGS001474 | Brain Volume Measurement (Neuroimaging) | 0.005  | 0.015  | 0.335  | NA    | NA    | NA    | QT      | 0.182 | 0.257 | None |
| PGS001475 | Brain Volume Measurement (Neuroimaging) | 0.007  | 0.016  | 0.437  | NA    | NA    | NA    | QT      | 0.241 | 0.330 | None |
| PGS001476 | Brain Volume Measurement (Neuroimaging) | -0.048 | -0.052 | 0.932  | NA    | NA    | NA    | QT      | 0.641 | 0.723 | None |
| PGS001477 | Brain Volume Measurement (Neuroimaging) | -0.042 | -0.045 | 0.931  | NA    | NA    | NA    | QT      | 0.680 | 0.755 | None |
| PGS001478 | Brain Volume Measurement (Neuroimaging) | -0.032 | -0.027 | 1.171  | NA    | NA    | NA    | QT      | 0.535 | 0.628 | None |
| PGS001479 | Brain Volume Measurement (Neuroimaging) | -0.042 | -0.042 | 0.985  | NA    | NA    | NA    | QT      | 0.930 | 0.955 | None |
| PGS001480 | Brain Volume Measurement (Neuroimaging) | -0.047 | -0.048 | 0.985  | NA    | NA    | NA    | QT      | 0.922 | 0.949 | None |
| PGS001481 | Brain Volume Measurement (Neuroimaging) | -0.048 | -0.047 | 1.024  | NA    | NA    | NA    | QT      | 0.878 | 0.916 | None |
| PGS001482 | Brain Volume Measurement (Neuroimaging) | 0.026  | 0.034  | 0.765  | NA    | NA    | NA    | QT      | 0.287 | 0.381 | None |
| PGS001483 | Brain Volume Measurement (Neuroimaging) | 0.008  | 0.018  | 0.432  | NA    | NA    | NA    | QT      | 0.177 | 0.251 | None |
| PGS001485 | Brain Volume Measurement (Neuroimaging) | -0.032 | -0.027 | 1.179  | NA    | NA    | NA    | QT      | 0.523 | 0.617 | None |
| PGS001486 | Brain Volume Measurement (Neuroimaging) | 0.011  | 0.019  | 0.588  | NA    | NA    | NA    | QT      | 0.295 | 0.389 | None |
| PGS001487 | Brain Volume Measurement (Neuroimaging) | 0.010  | 0.020  | 0.488  | NA    | NA    | NA    | QT      | 0.166 | 0.237 | None |
| PGS001488 | Brain Volume Measurement (Neuroimaging) | -0.041 | -0.036 | 1.140  | NA    | NA    | NA    | QT      | 0.504 | 0.600 | None |
| PGS001489 | Brain Volume Measurement (Neuroimaging) | -0.035 | -0.033 | 1.073  | NA    | NA    | NA    | QT      | 0.752 | 0.812 | None |
| PGS001490 | Brain Volume Measurement (Neuroimaging) | -0.028 | -0.020 | 1.405  | NA    | NA    | NA    | QT      | 0.274 | 0.366 | None |
| PGS001491 | Brain Volume Measurement (Neuroimaging) | 0.021  | 0.027  | 0.782  | NA    | NA    | NA    | QT      | 0.435 | 0.535 | None |
| PGS001492 | Brain Volume Measurement (Neuroimaging) | 0.009  | 0.024  | 0.369  | NA    | NA    | NA    | QT      | 0.044 | 0.071 | M    |
| PGS001493 | Brain Volume Measurement (Neuroimaging) | 0.004  | 0.001  | 3.354  | NA    | NA    | NA    | QT      | 0.677 | 0.752 | None |
| PGS001494 | Brain Volume Measurement (Neuroimaging) | -0.008 | 0.003  | -2.801 | NA    | NA    | NA    | QT      | 0.153 | 0.222 | None |
| PGS001495 | Brain Volume Measurement (Neuroimaging) | -0.026 | -0.028 | 0.939  | NA    | NA    | NA    | QT      | 0.820 | 0.865 | None |
| PGS001496 | Brain Volume Measurement (Neuroimaging) | 0.005  | -0.002 | -2.360 | NA    | NA    | NA    | QT      | 0.385 | 0.487 | None |
| PGS001497 | Brain Volume Measurement (Neuroimaging) | 0.001  | 0.005  | 0.153  | NA    | NA    | NA    | QT      | 0.535 | 0.628 | None |
| PGS001498 | Brain Volume Measurement (Neuroimaging) | -0.003 | -0.006 | 0.565  | NA    | NA    | NA    | QT      | 0.735 | 0.800 | None |
| PGS001499 | Brain Volume Measurement (Neuroimaging) | 0.003  | 0.008  | 0.408  | NA    | NA    | NA    | QT      | 0.517 | 0.613 | None |
| PGS001500 | Brain Volume Measurement (Neuroimaging) | -0.005 | 0.003  | -1.379 | NA    | NA    | NA    | QT      | 0.274 | 0.366 | None |
| PGS001501 | Brain Volume Measurement (Neuroimaging) | 0.008  | 0.016  | 0.478  | NA    | NA    | NA    | QT      | 0.254 | 0.344 | None |
| PGS001502 | Brain Volume Measurement (Neuroimaging) | -0.009 | -0.012 | 0.769  | NA    | NA    | NA    | QT      | 0.708 | 0.776 | None |
| PGS001503 | Brain Volume Measurement (Neuroimaging) | -0.021 | -0.026 | 0.807  | NA    | NA    | NA    | QT      | 0.500 | 0.596 | None |
| PGS001504 | Brain Volume Measurement (Neuroimaging) | -0.046 | -0.047 | 0.979  | NA    | NA    | NA    | QT      | 0.895 | 0.928 | None |
| PGS001505 | Brain Volume Measurement (Neuroimaging) | -0.008 | -0.011 | 0.765  | NA    | NA    | NA    | QT      | 0.739 | 0.802 | None |
| PGS001506 | Brain Volume Measurement (Neuroimaging) | 0.000  | 0.000  | -1.723 | NA    | NA    | NA    | QT      | 0.923 | 0.950 | None |
| PGS001517 | Platelet Crit                           | 0.493  | 0.443  | 1.112  | NA    | NA    | NA    | QT      | 0.000 | 0.000 | F    |
| PGS001521 | PR Interval                             | 0.211  | 0.252  | 0.838  | NA    | NA    | NA    | QT      | 0.000 | 0.000 | M    |
| PGS001525 | QRS Duration                            | 0.160  | 0.197  | 0.812  | NA    | NA    | NA    | QT      | 0.000 | 0.000 | M    |
| PGS001526 | QT Interval                             | 0.239  | 0.210  | 1.139  | NA    | NA    | NA    | QT      | 0.001 | 0.003 | F    |
| PGS001527 | QT Interval                             | 0.142  | 0.118  | 1.203  | NA    | NA    | NA    | QT      | 0.010 | 0.018 | F    |
| PGS001528 | Reticulocyte Count                      | 0.234  | 0.269  | 0.869  | NA    | NA    | NA    | QT      | 0.000 | 0.000 | M    |
| PGS001529 | Bone Density                            | 0.420  | 0.499  | 0.842  | NA    | NA    | NA    | QT      | 0.000 | 0.000 | M    |
| PGS001530 | Bone Density                            | 0.324  | 0.352  | 0.921  | NA    | NA    | NA    | QT      | 0.000 | 0.000 | M    |
| PGS001531 | Bone Density                            | 0.328  | 0.356  | 0.921  | NA    | NA    | NA    | QT      | 0.000 | 0.000 | M    |
| PGS001532 | Smoking Status Measurement              | -0.084 | -0.094 | 0.888  | NA    | NA    | NA    | QT      | 0.303 | 0.396 | None |
| PGS001536 | Vitiligo                                | 0.434  | 0.438  | 0.991  | 1.544 | 1.550 | 0.996 | Disease | 0.977 | 0.984 | None |
| PGS001630 | Hippocampal Volume                      | 0.153  | 0.173  | 0.886  | NA    | NA    | NA    | QT      | 0.014 | 0.024 | M    |
| PGS001642 | Brain Volume Measurement (Neuroimaging) | -0.233 | -0.246 | 0.950  | NA    | NA    | NA    | QT      | 0.086 | 0.133 | None |
| PGS001643 | Brain Volume Measurement (Neuroimaging) | 0.002  | 0.001  | 1.507  | NA    | NA    | NA    | QT      | 0.946 | 0.966 | None |
| PGS001644 | Brain Volume Measurement (Neuroimaging) | 0.002  | -0.002 | -0.904 | NA    | NA    | NA    | QT      | 0.673 | 0.750 | None |
| PGS001645 | Brain Volume Measurement (Neuroimaging) | 0.004  | 0.013  | 0.348  | NA    | NA    | NA    | QT      | 0.266 | 0.358 | None |

|           |                                         |        |        |          |    |    |    |    |       |       |      |
|-----------|-----------------------------------------|--------|--------|----------|----|----|----|----|-------|-------|------|
| PGS001646 | Brain Volume Measurement (Neuroimaging) | 0.016  | 0.020  | 0.764    | NA | NA | NA | QT | 0.522 | 0.616 | None |
| PGS001647 | Brain Volume Measurement (Neuroimaging) | 0.024  | 0.027  | 0.898    | NA | NA | NA | QT | 0.712 | 0.781 | None |
| PGS001648 | Brain Volume Measurement (Neuroimaging) | 0.013  | 0.021  | 0.612    | NA | NA | NA | QT | 0.286 | 0.380 | None |
| PGS001649 | Brain Volume Measurement (Neuroimaging) | 0.003  | 0.000  | -7.320   | NA | NA | NA | QT | 0.630 | 0.714 | None |
| PGS001650 | Brain Volume Measurement (Neuroimaging) | -0.011 | 0.000  | -142.822 | NA | NA | NA | QT | 0.134 | 0.197 | None |
| PGS001651 | Brain Volume Measurement (Neuroimaging) | 0.016  | 0.023  | 0.679    | NA | NA | NA | QT | 0.315 | 0.410 | None |
| PGS001652 | Brain Volume Measurement (Neuroimaging) | -0.011 | -0.008 | 1.414    | NA | NA | NA | QT | 0.671 | 0.748 | None |
| PGS001653 | Brain Volume Measurement (Neuroimaging) | -0.001 | -0.004 | 0.142    | NA | NA | NA | QT | 0.626 | 0.710 | None |
| PGS001654 | Brain Volume Measurement (Neuroimaging) | -0.016 | -0.014 | 1.179    | NA | NA | NA | QT | 0.744 | 0.806 | None |
| PGS001655 | Brain Volume Measurement (Neuroimaging) | -0.009 | -0.010 | 0.843    | NA | NA | NA | QT | 0.831 | 0.873 | None |
| PGS001656 | Brain Volume Measurement (Neuroimaging) | -0.009 | -0.004 | 2.557    | NA | NA | NA | QT | 0.442 | 0.543 | None |
| PGS001657 | Brain Volume Measurement (Neuroimaging) | 0.000  | 0.004  | 0.017    | NA | NA | NA | QT | 0.569 | 0.659 | None |
| PGS001658 | Brain Volume Measurement (Neuroimaging) | 0.015  | 0.013  | 1.147    | NA | NA | NA | QT | 0.798 | 0.849 | None |
| PGS001659 | Brain Volume Measurement (Neuroimaging) | 0.006  | 0.006  | 0.897    | NA | NA | NA | QT | 0.930 | 0.955 | None |
| PGS001660 | Brain Volume Measurement (Neuroimaging) | 0.000  | 0.003  | 0.089    | NA | NA | NA | QT | 0.701 | 0.772 | None |
| PGS001661 | Brain Volume Measurement (Neuroimaging) | -0.028 | -0.019 | 1.446    | NA | NA | NA | QT | 0.254 | 0.344 | None |
| PGS001662 | Brain Volume Measurement (Neuroimaging) | -0.029 | -0.023 | 1.286    | NA | NA | NA | QT | 0.387 | 0.489 | None |
| PGS001663 | Brain Volume Measurement (Neuroimaging) | -0.019 | -0.009 | 2.221    | NA | NA | NA | QT | 0.165 | 0.236 | None |
| PGS001664 | Brain Volume Measurement (Neuroimaging) | -0.022 | -0.017 | 1.331    | NA | NA | NA | QT | 0.462 | 0.562 | None |
| PGS001665 | Brain Volume Measurement (Neuroimaging) | -0.003 | 0.011  | -0.226   | NA | NA | NA | QT | 0.064 | 0.101 | None |
| PGS001666 | Brain Volume Measurement (Neuroimaging) | -0.015 | 0.003  | -4.951   | NA | NA | NA | QT | 0.020 | 0.034 | F    |
| PGS001667 | Brain Volume Measurement (Neuroimaging) | -0.014 | -0.012 | 1.129    | NA | NA | NA | QT | 0.834 | 0.876 | None |
| PGS001668 | Brain Volume Measurement (Neuroimaging) | -0.013 | -0.007 | 1.852    | NA | NA | NA | QT | 0.432 | 0.534 | None |
| PGS001669 | Brain Volume Measurement (Neuroimaging) | -0.032 | -0.033 | 0.974    | NA | NA | NA | QT | 0.910 | 0.941 | None |
| PGS001670 | Brain Volume Measurement (Neuroimaging) | -0.030 | -0.026 | 1.131    | NA | NA | NA | QT | 0.645 | 0.726 | None |
| PGS001671 | Brain Volume Measurement (Neuroimaging) | -0.031 | -0.029 | 1.050    | NA | NA | NA | QT | 0.843 | 0.883 | None |
| PGS001672 | Brain Volume Measurement (Neuroimaging) | -0.035 | -0.033 | 1.079    | NA | NA | NA | QT | 0.731 | 0.797 | None |
| PGS001673 | Brain Volume Measurement (Neuroimaging) | -0.038 | -0.034 | 1.114    | NA | NA | NA | QT | 0.600 | 0.688 | None |
| PGS001674 | Brain Volume Measurement (Neuroimaging) | -0.036 | -0.033 | 1.085    | NA | NA | NA | QT | 0.705 | 0.775 | None |
| PGS001675 | Brain Volume Measurement (Neuroimaging) | 0.017  | 0.031  | 0.554    | NA | NA | NA | QT | 0.069 | 0.108 | None |
| PGS001676 | Brain Volume Measurement (Neuroimaging) | 0.012  | 0.022  | 0.527    | NA | NA | NA | QT | 0.156 | 0.226 | None |
| PGS001677 | Brain Volume Measurement (Neuroimaging) | -0.007 | -0.010 | 0.739    | NA | NA | NA | QT | 0.738 | 0.802 | None |
| PGS001678 | Brain Volume Measurement (Neuroimaging) | -0.024 | -0.010 | 2.444    | NA | NA | NA | QT | 0.059 | 0.093 | None |
| PGS001679 | Brain Volume Measurement (Neuroimaging) | -0.021 | -0.011 | 1.936    | NA | NA | NA | QT | 0.185 | 0.261 | None |
| PGS001680 | Brain Volume Measurement (Neuroimaging) | -0.044 | -0.040 | 1.112    | NA | NA | NA | QT | 0.554 | 0.646 | None |
| PGS001681 | Brain Volume Measurement (Neuroimaging) | -0.042 | -0.039 | 1.064    | NA | NA | NA | QT | 0.739 | 0.803 | None |
| PGS001682 | Brain Volume Measurement (Neuroimaging) | -0.023 | -0.021 | 1.113    | NA | NA | NA | QT | 0.755 | 0.814 | None |
| PGS001683 | Brain Volume Measurement (Neuroimaging) | -0.021 | -0.018 | 1.160    | NA | NA | NA | QT | 0.706 | 0.775 | None |
| PGS001684 | Brain Volume Measurement (Neuroimaging) | -0.006 | 0.001  | -5.846   | NA | NA | NA | QT | 0.332 | 0.429 | None |
| PGS001685 | Brain Volume Measurement (Neuroimaging) | -0.007 | -0.002 | 3.419    | NA | NA | NA | QT | 0.492 | 0.588 | None |
| PGS001686 | Brain Volume Measurement (Neuroimaging) | -0.013 | -0.003 | 4.750    | NA | NA | NA | QT | 0.162 | 0.233 | None |
| PGS001687 | Brain Volume Measurement (Neuroimaging) | -0.013 | 0.000  | -36.634  | NA | NA | NA | QT | 0.073 | 0.113 | None |
| PGS001688 | Brain Volume Measurement (Neuroimaging) | 0.008  | 0.012  | 0.635    | NA | NA | NA | QT | 0.561 | 0.651 | None |
| PGS001689 | Brain Volume Measurement (Neuroimaging) | 0.004  | 0.010  | 0.402    | NA | NA | NA | QT | 0.416 | 0.518 | None |
| PGS001690 | Brain Volume Measurement (Neuroimaging) | -0.005 | 0.000  | -45.621  | NA | NA | NA | QT | 0.462 | 0.562 | None |
| PGS001691 | Brain Volume Measurement (Neuroimaging) | 0.010  | 0.011  | 0.855    | NA | NA | NA | QT | 0.827 | 0.869 | None |
| PGS001692 | Brain Volume Measurement (Neuroimaging) | -0.001 | 0.000  | -19.227  | NA | NA | NA | QT | 0.908 | 0.940 | None |
| PGS001693 | Brain Volume Measurement (Neuroimaging) | -0.007 | 0.000  | 20.063   | NA | NA | NA | QT | 0.344 | 0.441 | None |
| PGS001694 | Brain Volume Measurement (Neuroimaging) | -0.017 | -0.014 | 1.185    | NA | NA | NA | QT | 0.722 | 0.789 | None |
| PGS001695 | Brain Volume Measurement (Neuroimaging) | -0.005 | -0.003 | 1.658    | NA | NA | NA | QT | 0.777 | 0.831 | None |
| PGS001696 | Brain Volume Measurement (Neuroimaging) | -0.006 | -0.008 | 0.810    | NA | NA | NA | QT | 0.844 | 0.883 | None |
| PGS001697 | Brain Volume Measurement (Neuroimaging) | -0.018 | -0.006 | 3.185    | NA | NA | NA | QT | 0.108 | 0.163 | None |
| PGS001698 | Brain Volume Measurement (Neuroimaging) | 0.009  | 0.011  | 0.789    | NA | NA | NA | QT | 0.756 | 0.814 | None |
| PGS001699 | Brain Volume Measurement (Neuroimaging) | -0.001 | -0.001 | 1.487    | NA | NA | NA | QT | 0.953 | 0.969 | None |
| PGS001700 | Brain Volume Measurement (Neuroimaging) | -0.002 | 0.004  | -0.608   | NA | NA | NA | QT | 0.399 | 0.501 | None |
| PGS001701 | Brain Volume Measurement (Neuroimaging) | -0.006 | 0.000  | 28.965   | NA | NA | NA | QT | 0.444 | 0.544 | None |

|           |                                         |        |        |         |    |    |    |    |       |       |      |
|-----------|-----------------------------------------|--------|--------|---------|----|----|----|----|-------|-------|------|
| PGS001702 | Brain Volume Measurement (Neuroimaging) | -0.018 | -0.018 | 1.004   | NA | NA | NA | QT | 0.992 | 0.994 | None |
| PGS001703 | Brain Volume Measurement (Neuroimaging) | -0.008 | -0.011 | 0.757   | NA | NA | NA | QT | 0.732 | 0.797 | None |
| PGS001704 | Brain Volume Measurement (Neuroimaging) | 0.024  | 0.026  | 0.910   | NA | NA | NA | QT | 0.754 | 0.814 | None |
| PGS001705 | Brain Volume Measurement (Neuroimaging) | 0.036  | 0.036  | 1.008   | NA | NA | NA | QT | 0.971 | 0.981 | None |
| PGS001706 | Brain Volume Measurement (Neuroimaging) | 0.028  | 0.025  | 1.107   | NA | NA | NA | QT | 0.719 | 0.786 | None |
| PGS001707 | Brain Volume Measurement (Neuroimaging) | 0.032  | 0.037  | 0.868   | NA | NA | NA | QT | 0.518 | 0.613 | None |
| PGS001708 | Brain Volume Measurement (Neuroimaging) | 0.027  | 0.024  | 1.161   | NA | NA | NA | QT | 0.613 | 0.698 | None |
| PGS001709 | Brain Volume Measurement (Neuroimaging) | 0.038  | 0.047  | 0.807   | NA | NA | NA | QT | 0.224 | 0.308 | None |
| PGS001710 | Brain Volume Measurement (Neuroimaging) | 0.024  | 0.031  | 0.762   | NA | NA | NA | QT | 0.324 | 0.420 | None |
| PGS001711 | Brain Volume Measurement (Neuroimaging) | 0.009  | 0.011  | 0.824   | NA | NA | NA | QT | 0.793 | 0.845 | None |
| PGS001712 | Brain Volume Measurement (Neuroimaging) | 0.005  | 0.005  | 1.066   | NA | NA | NA | QT | 0.965 | 0.977 | None |
| PGS001713 | Brain Volume Measurement (Neuroimaging) | 0.008  | -0.005 | -1.477  | NA | NA | NA | QT | 0.087 | 0.133 | None |
| PGS001714 | Brain Volume Measurement (Neuroimaging) | 0.013  | 0.006  | 2.156   | NA | NA | NA | QT | 0.345 | 0.443 | None |
| PGS001715 | Brain Volume Measurement (Neuroimaging) | 0.014  | -0.005 | -2.730  | NA | NA | NA | QT | 0.011 | 0.019 | F    |
| PGS001716 | Brain Volume Measurement (Neuroimaging) | 0.009  | -0.006 | -1.466  | NA | NA | NA | QT | 0.034 | 0.056 | F    |
| PGS001717 | Brain Volume Measurement (Neuroimaging) | -0.009 | -0.023 | 0.413   | NA | NA | NA | QT | 0.074 | 0.116 | None |
| PGS001718 | Brain Volume Measurement (Neuroimaging) | 0.010  | -0.006 | -1.733  | NA | NA | NA | QT | 0.029 | 0.048 | F    |
| PGS001719 | Brain Volume Measurement (Neuroimaging) | 0.018  | 0.003  | 5.563   | NA | NA | NA | QT | 0.047 | 0.075 | F    |
| PGS001720 | Brain Volume Measurement (Neuroimaging) | 0.021  | 0.002  | 9.928   | NA | NA | NA | QT | 0.011 | 0.018 | F    |
| PGS001721 | Brain Volume Measurement (Neuroimaging) | 0.018  | 0.018  | 0.969   | NA | NA | NA | QT | 0.940 | 0.961 | None |
| PGS001722 | Brain Volume Measurement (Neuroimaging) | 0.020  | 0.009  | 2.192   | NA | NA | NA | QT | 0.142 | 0.208 | None |
| PGS001723 | Brain Volume Measurement (Neuroimaging) | 0.018  | 0.010  | 1.753   | NA | NA | NA | QT | 0.308 | 0.403 | None |
| PGS001724 | Brain Volume Measurement (Neuroimaging) | 0.018  | 0.009  | 1.919   | NA | NA | NA | QT | 0.261 | 0.352 | None |
| PGS001725 | Brain Volume Measurement (Neuroimaging) | 0.024  | 0.020  | 1.171   | NA | NA | NA | QT | 0.646 | 0.727 | None |
| PGS001726 | Brain Volume Measurement (Neuroimaging) | 0.004  | -0.006 | -0.700  | NA | NA | NA | QT | 0.185 | 0.261 | None |
| PGS001727 | Brain Volume Measurement (Neuroimaging) | -0.005 | -0.024 | 0.230   | NA | NA | NA | QT | 0.015 | 0.025 | M    |
| PGS001728 | Brain Volume Measurement (Neuroimaging) | -0.002 | -0.013 | 0.143   | NA | NA | NA | QT | 0.134 | 0.198 | None |
| PGS001729 | Brain Volume Measurement (Neuroimaging) | 0.008  | 0.002  | 3.709   | NA | NA | NA | QT | 0.434 | 0.535 | None |
| PGS001730 | Brain Volume Measurement (Neuroimaging) | 0.015  | -0.007 | -2.259  | NA | NA | NA | QT | 0.003 | 0.006 | F    |
| PGS001731 | Brain Volume Measurement (Neuroimaging) | 0.003  | -0.012 | -0.274  | NA | NA | NA | QT | 0.045 | 0.072 | M    |
| PGS001732 | Brain Volume Measurement (Neuroimaging) | -0.010 | -0.027 | 0.382   | NA | NA | NA | QT | 0.027 | 0.044 | M    |
| PGS001733 | Brain Volume Measurement (Neuroimaging) | 0.007  | -0.005 | -1.301  | NA | NA | NA | QT | 0.123 | 0.183 | None |
| PGS001734 | Brain Volume Measurement (Neuroimaging) | 0.011  | -0.001 | -10.428 | NA | NA | NA | QT | 0.109 | 0.164 | None |
| PGS001735 | Brain Volume Measurement (Neuroimaging) | 0.024  | 0.022  | 1.053   | NA | NA | NA | QT | 0.875 | 0.913 | None |
| PGS001736 | Brain Volume Measurement (Neuroimaging) | 0.023  | 0.013  | 1.770   | NA | NA | NA | QT | 0.185 | 0.261 | None |
| PGS001737 | Brain Volume Measurement (Neuroimaging) | 0.025  | 0.021  | 1.199   | NA | NA | NA | QT | 0.584 | 0.672 | None |
| PGS001738 | Brain Volume Measurement (Neuroimaging) | 0.024  | 0.015  | 1.552   | NA | NA | NA | QT | 0.262 | 0.353 | None |
| PGS001739 | Brain Volume Measurement (Neuroimaging) | 0.015  | 0.022  | 0.649   | NA | NA | NA | QT | 0.294 | 0.389 | None |
| PGS001740 | Brain Volume Measurement (Neuroimaging) | -0.006 | -0.025 | 0.244   | NA | NA | NA | QT | 0.011 | 0.019 | M    |
| PGS001741 | Brain Volume Measurement (Neuroimaging) | -0.007 | -0.015 | 0.473   | NA | NA | NA | QT | 0.289 | 0.383 | None |
| PGS001742 | Brain Volume Measurement (Neuroimaging) | -0.010 | -0.029 | 0.337   | NA | NA | NA | QT | 0.010 | 0.017 | M    |
| PGS001743 | Brain Volume Measurement (Neuroimaging) | -0.010 | -0.024 | 0.403   | NA | NA | NA | QT | 0.055 | 0.088 | None |
| PGS001744 | Brain Volume Measurement (Neuroimaging) | 0.009  | 0.015  | 0.644   | NA | NA | NA | QT | 0.489 | 0.586 | None |
| PGS001745 | Brain Volume Measurement (Neuroimaging) | 0.022  | 0.004  | 5.645   | NA | NA | NA | QT | 0.017 | 0.028 | F    |
| PGS001746 | Brain Volume Measurement (Neuroimaging) | 0.008  | 0.002  | 4.272   | NA | NA | NA | QT | 0.432 | 0.534 | None |
| PGS001747 | Brain Volume Measurement (Neuroimaging) | 0.010  | 0.008  | 1.236   | NA | NA | NA | QT | 0.801 | 0.851 | None |
| PGS001748 | Brain Volume Measurement (Neuroimaging) | 0.018  | 0.012  | 1.474   | NA | NA | NA | QT | 0.434 | 0.535 | None |
| PGS001749 | Brain Volume Measurement (Neuroimaging) | 0.025  | 0.017  | 1.455   | NA | NA | NA | QT | 0.293 | 0.387 | None |
| PGS001750 | Brain Volume Measurement (Neuroimaging) | 0.028  | 0.031  | 0.898   | NA | NA | NA | QT | 0.675 | 0.752 | None |
| PGS001751 | Brain Volume Measurement (Neuroimaging) | 0.026  | 0.018  | 1.411   | NA | NA | NA | QT | 0.318 | 0.414 | None |
| PGS001752 | Brain Volume Measurement (Neuroimaging) | 0.025  | 0.022  | 1.153   | NA | NA | NA | QT | 0.656 | 0.736 | None |
| PGS001753 | Brain Volume Measurement (Neuroimaging) | 0.028  | 0.017  | 1.686   | NA | NA | NA | QT | 0.130 | 0.192 | None |
| PGS001754 | Brain Volume Measurement (Neuroimaging) | 0.028  | 0.034  | 0.833   | NA | NA | NA | QT | 0.448 | 0.549 | None |
| PGS001755 | Brain Volume Measurement (Neuroimaging) | -0.003 | -0.014 | 0.198   | NA | NA | NA | QT | 0.125 | 0.186 | None |
| PGS001756 | Brain Volume Measurement (Neuroimaging) | 0.009  | 0.001  | 13.451  | NA | NA | NA | QT | 0.261 | 0.352 | None |
| PGS001757 | Brain Volume Measurement (Neuroimaging) | -0.004 | -0.024 | 0.165   | NA | NA | NA | QT | 0.007 | 0.012 | M    |

|           |                                         |        |        |        |       |       |       |         |       |       |      |
|-----------|-----------------------------------------|--------|--------|--------|-------|-------|-------|---------|-------|-------|------|
| PGS001758 | Brain Volume Measurement (Neuroimaging) | 0.004  | -0.013 | -0.309 | NA    | NA    | NA    | QT      | 0.020 | 0.033 | M    |
| PGS001759 | Brain Volume Measurement (Neuroimaging) | 0.002  | 0.012  | 0.184  | NA    | NA    | NA    | QT      | 0.186 | 0.262 | None |
| PGS001760 | Brain Volume Measurement (Neuroimaging) | -0.008 | -0.014 | 0.599  | NA    | NA    | NA    | QT      | 0.468 | 0.567 | None |
| PGS001761 | Brain Volume Measurement (Neuroimaging) | 0.002  | 0.012  | 0.147  | NA    | NA    | NA    | QT      | 0.168 | 0.240 | None |
| PGS001762 | Brain Volume Measurement (Neuroimaging) | 0.030  | 0.030  | 1.002  | NA    | NA    | NA    | QT      | 0.995 | 0.996 | None |
| PGS001763 | Brain Volume Measurement (Neuroimaging) | 0.019  | 0.017  | 1.142  | NA    | NA    | NA    | QT      | 0.749 | 0.810 | None |
| PGS001764 | Brain Volume Measurement (Neuroimaging) | 0.016  | 0.017  | 0.956  | NA    | NA    | NA    | QT      | 0.922 | 0.949 | None |
| PGS001765 | Brain Volume Measurement (Neuroimaging) | 0.009  | 0.022  | 0.385  | NA    | NA    | NA    | QT      | 0.067 | 0.104 | None |
| PGS001766 | Brain Volume Measurement (Neuroimaging) | 0.000  | 0.000  | -1.444 | NA    | NA    | NA    | QT      | 0.968 | 0.978 | None |
| PGS001767 | Brain Volume Measurement (Neuroimaging) | -0.041 | -0.052 | 0.778  | NA    | NA    | NA    | QT      | 0.123 | 0.183 | None |
| PGS001768 | Brain Volume Measurement (Neuroimaging) | -0.009 | -0.001 | 9.831  | NA    | NA    | NA    | QT      | 0.280 | 0.373 | None |
| PGS001769 | Brain Volume Measurement (Neuroimaging) | -0.047 | -0.043 | 1.109  | NA    | NA    | NA    | QT      | 0.535 | 0.628 | None |
| PGS001770 | Brain Volume Measurement (Neuroimaging) | -0.054 | -0.039 | 1.371  | NA    | NA    | NA    | QT      | 0.052 | 0.083 | None |
| PGS001771 | Brain Volume Measurement (Neuroimaging) | -0.038 | -0.048 | 0.797  | NA    | NA    | NA    | QT      | 0.189 | 0.266 | None |
| PGS001773 | Eczema                                  | -0.036 | -0.082 | 0.441  | 0.965 | 0.922 | 1.047 | Disease | 0.703 | 0.773 | None |
| PGS001774 | Parkinson's Disease                     | 0.203  | 0.151  | 1.347  | 1.225 | 1.163 | 1.054 | Disease | 0.101 | 0.153 | None |
| PGS001775 | Alzheimer's Disease                     | 0.333  | 0.308  | 1.083  | 1.396 | 1.360 | 1.026 | Disease | 0.461 | 0.562 | None |
| PGS001776 | Colorectal Cancer                       | 0.173  | 0.216  | 0.802  | 1.189 | 1.241 | 0.958 | Disease | 0.052 | 0.083 | None |
| PGS001780 | Coronary Artery Disease                 | 0.328  | 0.418  | 0.786  | 1.389 | 1.519 | 0.915 | Disease | 0.000 | 0.000 | M    |
| PGS001781 | Type 2 Diabetes Mellitus                | 0.480  | 0.467  | 1.027  | 1.615 | 1.595 | 1.012 | Disease | 0.246 | 0.335 | None |
| PGS001782 | Asthma                                  | 0.699  | 0.734  | 0.952  | 2.011 | 2.084 | 0.965 | Disease | 0.001 | 0.002 | M    |
| PGS001783 | Chronic Obstructive Pulmonary Disease   | 0.735  | 0.761  | 0.966  | 2.086 | 2.141 | 0.974 | Disease | 0.083 | 0.128 | None |
| PGS001784 | Abdominal Aortic Aneurysm               | 0.271  | 0.343  | 0.791  | 1.312 | 1.410 | 0.931 | Disease | 0.112 | 0.168 | None |
| PGS001787 | Asthma                                  | 0.418  | 0.455  | 0.918  | 1.518 | 1.576 | 0.963 | Disease | 0.000 | 0.000 | M    |
| PGS001788 | Chronic Obstructive Pulmonary Disease   | 0.315  | 0.317  | 0.994  | 1.371 | 1.374 | 0.998 | Disease | 0.893 | 0.927 | None |
| PGS001789 | Gout                                    | 0.437  | 0.522  | 0.837  | 1.548 | 1.685 | 0.918 | Disease | 0.001 | 0.001 | M    |
| PGS001790 | Heart Failure                           | 0.243  | 0.233  | 1.041  | 1.275 | 1.263 | 1.010 | Disease | 0.532 | 0.626 | None |
| PGS001792 | Glaucoma                                | 0.436  | 0.459  | 0.950  | 1.547 | 1.583 | 0.977 | Disease | 0.200 | 0.280 | None |
| PGS001793 | Stroke                                  | 0.150  | 0.169  | 0.890  | 1.162 | 1.184 | 0.982 | Disease | 0.268 | 0.360 | None |
| PGS001794 | Thyroid Carcinoma                       | 0.428  | 0.587  | 0.729  | 1.535 | 1.799 | 0.853 | Disease | 0.050 | 0.081 | None |
| PGS001796 | Venous Thromboembolism                  | 0.340  | 0.424  | 0.804  | 1.405 | 1.527 | 0.920 | Disease | 0.000 | 0.000 | M    |
| PGS001797 | Glaucoma                                | 0.610  | 0.670  | 0.911  | 1.841 | 1.955 | 0.942 | Disease | 0.001 | 0.002 | M    |
| PGS001798 | Stroke                                  | 0.266  | 0.307  | 0.867  | 1.305 | 1.359 | 0.960 | Disease | 0.014 | 0.025 | M    |
| PGS001799 | Thyroid Carcinoma                       | 1.672  | 1.887  | 0.886  | 5.322 | 6.597 | 0.807 | Disease | 0.007 | 0.012 | M    |
| PGS001800 | Forced Expiratory Volume                | -0.238 | -0.380 | 0.626  | NA    | NA    | NA    | QT      | 0.000 | 0.000 | M    |
| PGS001802 | Colorectal Cancer                       | 0.532  | 0.609  | 0.873  | 1.702 | 1.839 | 0.925 | Disease | 0.000 | 0.001 | M    |
| PGS001803 | Skin Carcinoma                          | 0.559  | 0.556  | 1.006  | 1.750 | 1.744 | 1.003 | Disease | 0.767 | 0.822 | None |
| PGS001807 | Urinary Bladder Carcinoma               | 0.354  | 0.328  | 1.079  | 1.424 | 1.388 | 1.026 | Disease | 0.414 | 0.517 | None |
| PGS001808 | Brain Cancer                            | 0.569  | 0.567  | 1.004  | 1.767 | 1.763 | 1.002 | Disease | 0.966 | 0.977 | None |
| PGS001809 | Thyroid Carcinoma                       | 0.483  | 0.552  | 0.875  | 1.622 | 1.737 | 0.933 | Disease | 0.363 | 0.463 | None |
| PGS001816 | Hypothyroidism                          | 0.872  | 0.828  | 1.052  | 2.391 | 2.289 | 1.044 | Disease | 0.002 | 0.004 | F    |
| PGS001817 | Type 1 Diabetes Mellitus                | 0.730  | 0.596  | 1.224  | 2.075 | 1.815 | 1.143 | Disease | 0.000 | 0.000 | F    |
| PGS001818 | Type 2 Diabetes Mellitus                | 0.953  | 0.996  | 0.957  | 2.592 | 2.706 | 0.958 | Disease | 0.000 | 0.000 | M    |
| PGS001819 | Diabetic Retinopathy                    | 0.298  | 0.279  | 1.067  | 1.347 | 1.322 | 1.019 | Disease | 0.487 | 0.584 | None |
| PGS001822 | Gout                                    | 0.401  | 0.464  | 0.864  | 1.494 | 1.591 | 0.939 | Disease | 0.010 | 0.017 | M    |
| PGS001827 | Dementia                                | 0.577  | 0.442  | 1.306  | 1.781 | 1.556 | 1.145 | Disease | 0.000 | 0.000 | F    |
| PGS001828 | Alzheimer's Disease                     | 0.690  | 0.568  | 1.215  | 1.994 | 1.764 | 1.130 | Disease | 0.000 | 0.000 | F    |
| PGS001831 | Multiple Sclerosis                      | 0.652  | 0.643  | 1.015  | 1.920 | 1.901 | 1.010 | Disease | 0.820 | 0.865 | None |
| PGS001834 | Age-Related Macular Degeneration        | 0.346  | 0.292  | 1.185  | 1.414 | 1.339 | 1.056 | Disease | 0.004 | 0.008 | F    |
| PGS001836 | Glaucoma                                | 0.731  | 0.745  | 0.981  | 2.077 | 2.107 | 0.986 | Disease | 0.423 | 0.524 | None |
| PGS001837 | Cataract                                | 0.407  | 0.481  | 0.847  | 1.503 | 1.618 | 0.929 | Disease | 0.000 | 0.000 | M    |
| PGS001838 | Hypertension                            | 0.863  | 0.834  | 1.034  | 2.370 | 2.303 | 1.029 | Disease | 0.000 | 0.000 | F    |
| PGS001839 | Coronary Artery Disease                 | 0.547  | 0.797  | 0.686  | 1.728 | 2.220 | 0.779 | Disease | 0.000 | 0.000 | M    |
| PGS001841 | Atrial Fibrillation                     | 0.513  | 0.593  | 0.865  | 1.671 | 1.810 | 0.923 | Disease | 0.000 | 0.000 | M    |
| PGS001845 | Varicose Veins                          | 1.026  | 0.957  | 1.071  | 2.789 | 2.605 | 1.071 | Disease | 0.000 | 0.000 | F    |
| PGS001849 | Asthma                                  | 0.777  | 0.819  | 0.948  | 2.174 | 2.269 | 0.958 | Disease | 0.000 | 0.000 | M    |

|           |                                                  |        |        |       |       |       |       |         |       |       |      |
|-----------|--------------------------------------------------|--------|--------|-------|-------|-------|-------|---------|-------|-------|------|
| PGS001850 | Chronic Obstructive Pulmonary Disease            | 0.502  | 0.538  | 0.934 | 1.653 | 1.713 | 0.965 | Disease | 0.015 | 0.025 | M    |
| PGS001851 | Gastroesophageal Reflux Disease                  | 0.397  | 0.396  | 1.003 | 1.487 | 1.485 | 1.001 | Disease | 0.888 | 0.924 | None |
| PGS001854 | Inguinal Hernia                                  | 0.642  | 0.675  | 0.951 | 1.900 | 1.963 | 0.968 | Disease | 0.157 | 0.226 | None |
| PGS001855 | Ulcerative Colitis                               | 0.756  | 0.761  | 0.993 | 2.130 | 2.141 | 0.995 | Disease | 0.847 | 0.886 | None |
| PGS001856 | Celiac Disease                                   | 1.224  | 1.221  | 1.002 | 3.399 | 3.389 | 1.003 | Disease | 0.928 | 0.954 | None |
| PGS001870 | Systemic Lupus Erythematosus                     | 0.475  | 0.481  | 0.988 | 1.608 | 1.617 | 0.994 | Disease | 0.943 | 0.964 | None |
| PGS001871 | Psoriasis                                        | 0.474  | 0.473  | 1.002 | 1.606 | 1.605 | 1.001 | Disease | 0.967 | 0.978 | None |
| PGS001875 | Rheumatoid Arthritis                             | 0.344  | 0.333  | 1.034 | 1.410 | 1.394 | 1.011 | Disease | 0.577 | 0.666 | None |
| PGS001876 | Ankylosing Spondylitis                           | 0.586  | 0.755  | 0.776 | 1.796 | 2.128 | 0.844 | Disease | 0.000 | 0.000 | M    |
| PGS001882 | Osteoarthritis                                   | 0.271  | 0.282  | 0.958 | 1.311 | 1.326 | 0.988 | Disease | 0.096 | 0.146 | None |
| PGS001883 | Osteoporosis                                     | 0.205  | 0.168  | 1.222 | 1.228 | 1.183 | 1.038 | Disease | 0.040 | 0.065 | F    |
| PGS001886 | Serum Albumin Measurement                        | 0.433  | 0.427  | 1.013 | NA    | NA    | NA    | QT      | 0.036 | 0.058 | F    |
| PGS001888 | Apolipoprotein A1 Measurement                    | 0.450  | 0.365  | 1.234 | NA    | NA    | NA    | QT      | 0.000 | 0.000 | F    |
| PGS001889 | Apolipoprotein B Measurement                     | 0.377  | 0.317  | 1.192 | NA    | NA    | NA    | QT      | 0.000 | 0.000 | F    |
| PGS001892 | Birth Weight                                     | 0.378  | 0.400  | 0.946 | NA    | NA    | NA    | QT      | 0.000 | 0.000 | M    |
| PGS001893 | Calcium Measurement                              | 0.413  | 0.385  | 1.074 | NA    | NA    | NA    | QT      | 0.000 | 0.000 | F    |
| PGS001894 | Celiac Disease                                   | 0.963  | 0.971  | 0.992 | 2.621 | 2.641 | 0.992 | Disease | 0.780 | 0.833 | None |
| PGS001895 | Total Cholesterol Measurement                    | 0.356  | 0.316  | 1.127 | NA    | NA    | NA    | QT      | 0.000 | 0.000 | F    |
| PGS001900 | Diastolic Blood Pressure                         | 0.440  | 0.406  | 1.083 | NA    | NA    | NA    | QT      | 0.000 | 0.000 | F    |
| PGS001901 | Alcohol Consumption Measurement                  | 0.031  | 0.012  | 2.525 | NA    | NA    | NA    | QT      | 0.016 | 0.027 | F    |
| PGS001904 | PR Interval                                      | 0.221  | 0.264  | 0.838 | NA    | NA    | NA    | QT      | 0.000 | 0.000 | M    |
| PGS001905 | QT Interval                                      | 0.270  | 0.252  | 1.071 | NA    | NA    | NA    | QT      | 0.047 | 0.076 | F    |
| PGS001906 | QT Interval                                      | 0.159  | 0.140  | 1.138 | NA    | NA    | NA    | QT      | 0.037 | 0.061 | F    |
| PGS001908 | Red Blood Cell Distribution Width                | 0.389  | 0.332  | 1.170 | NA    | NA    | NA    | QT      | 0.000 | 0.000 | F    |
| PGS001909 | Erythrocyte Count                                | 0.425  | 0.474  | 0.897 | NA    | NA    | NA    | QT      | 0.000 | 0.000 | M    |
| PGS001911 | Smoking Status Measurement                       | -0.007 | -0.004 | 2.056 | NA    | NA    | NA    | QT      | 0.712 | 0.781 | None |
| PGS001917 | Fat Body Mass                                    | 0.441  | 0.351  | 1.258 | NA    | NA    | NA    | QT      | 0.000 | 0.000 | F    |
| PGS001918 | Forced Expiratory Volume                         | 0.259  | 0.424  | 0.611 | NA    | NA    | NA    | QT      | 0.000 | 0.000 | M    |
| PGS001927 | Grip Strength Measurement                        | 0.200  | 0.353  | 0.567 | NA    | NA    | NA    | QT      | 0.000 | 0.000 | M    |
| PGS001929 | Body Height                                      | 0.481  | 0.530  | 0.909 | NA    | NA    | NA    | QT      | 0.000 | 0.000 | M    |
| PGS001930 | Immature Reticulocyte Fraction Measurement       | 0.412  | 0.411  | 1.004 | NA    | NA    | NA    | QT      | 0.586 | 0.673 | None |
| PGS001932 | Insomnia                                         | 0.192  | 0.140  | 1.372 | 1.211 | 1.150 | 1.053 | Disease | 0.007 | 0.012 | F    |
| PGS001933 | Low-Density Lipoprotein Cholesterol Measurement  | 0.409  | 0.351  | 1.163 | NA    | NA    | NA    | QT      | 0.000 | 0.000 | F    |
| PGS001934 | Alcohol Consumption Measurement                  | -0.169 | -0.218 | 0.775 | NA    | NA    | NA    | QT      | 0.000 | 0.000 | M    |
| PGS001939 | Alkaline Phosphatase Measurement                 | 0.463  | 0.460  | 1.007 | NA    | NA    | NA    | QT      | 0.184 | 0.260 | None |
| PGS001940 | Serum Alanine Aminotransferase Measurement       | 0.275  | 0.383  | 0.718 | NA    | NA    | NA    | QT      | 0.000 | 0.000 | M    |
| PGS001941 | Aspartate Aminotransferase Measurement           | 0.245  | 0.315  | 0.779 | NA    | NA    | NA    | QT      | 0.000 | 0.000 | M    |
| PGS001942 | Bilirubin Measurement                            | 0.421  | 0.554  | 0.760 | NA    | NA    | NA    | QT      | 0.000 | 0.000 | M    |
| PGS001943 | Body Mass Index                                  | 0.602  | 0.475  | 1.266 | NA    | NA    | NA    | QT      | 0.000 | 0.000 | F    |
| PGS001945 | Creatinine Measurement                           | 0.304  | 0.378  | 0.806 | NA    | NA    | NA    | QT      | 0.000 | 0.000 | M    |
| PGS001946 | C-Reactive Protein Measurement                   | 0.321  | 0.263  | 1.219 | NA    | NA    | NA    | QT      | 0.000 | 0.000 | F    |
| PGS001947 | Cystatin C Measurement                           | 0.422  | 0.439  | 0.962 | NA    | NA    | NA    | QT      | 0.000 | 0.000 | M    |
| PGS001948 | QRS Duration                                     | 0.204  | 0.254  | 0.800 | NA    | NA    | NA    | QT      | 0.000 | 0.000 | M    |
| PGS001949 | Eosinophil Percentage of Leukocytes              | 0.275  | 0.322  | 0.855 | NA    | NA    | NA    | QT      | 0.000 | 0.000 | M    |
| PGS001951 | Fat Body Mass                                    | 0.417  | 0.335  | 1.244 | NA    | NA    | NA    | QT      | 0.000 | 0.000 | F    |
| PGS001952 | Glucose Measurement                              | 0.148  | 0.211  | 0.702 | NA    | NA    | NA    | QT      | 0.000 | 0.000 | M    |
| PGS001953 | HbA1c Measurement                                | 0.324  | 0.433  | 0.749 | NA    | NA    | NA    | QT      | 0.000 | 0.000 | M    |
| PGS001954 | High-Density Lipoprotein Cholesterol Measurement | 0.567  | 0.460  | 1.232 | NA    | NA    | NA    | QT      | 0.000 | 0.000 | F    |
| PGS001955 | Bone Density                                     | 0.514  | 0.599  | 0.857 | NA    | NA    | NA    | QT      | 0.000 | 0.000 | M    |
| PGS001956 | Bone Density                                     | 0.491  | 0.575  | 0.853 | NA    | NA    | NA    | QT      | 0.000 | 0.000 | M    |
| PGS001957 | Bone Density                                     | 0.493  | 0.602  | 0.819 | NA    | NA    | NA    | QT      | 0.000 | 0.000 | M    |
| PGS001958 | Waist Hip Ratio                                  | 0.078  | 0.143  | 0.545 | NA    | NA    | NA    | QT      | 0.000 | 0.000 | M    |
| PGS001959 | Reticulocyte Measurement                         | 0.282  | 0.307  | 0.921 | NA    | NA    | NA    | QT      | 0.000 | 0.000 | M    |
| PGS001960 | IGF-1 Measurement                                | 0.512  | 0.512  | 0.998 | NA    | NA    | NA    | QT      | 0.688 | 0.761 | None |
| PGS001962 | Leukocyte Count                                  | 0.428  | 0.429  | 0.998 | NA    | NA    | NA    | QT      | 0.733 | 0.797 | None |
| PGS001963 | Lipoprotein(a) Measurement                       | 0.591  | 0.586  | 1.009 | NA    | NA    | NA    | QT      | 0.040 | 0.066 | F    |

|           |                                           |       |       |       |       |       |       |         |       |       |      |
|-----------|-------------------------------------------|-------|-------|-------|-------|-------|-------|---------|-------|-------|------|
| PGS001964 | erum Gamma-Glutamyl Transferase Measureme | 0.279 | 0.388 | 0.718 | NA    | NA    | NA    | QT      | 0.000 | 0.000 | M    |
| PGS001965 | Lymphocyte Count                          | 0.277 | 0.266 | 1.039 | NA    | NA    | NA    | QT      | 0.000 | 0.001 | F    |
| PGS001967 | Urinary Microalbumin Measurement          | 0.031 | 0.064 | 0.485 | NA    | NA    | NA    | QT      | 0.000 | 0.000 | M    |
| PGS001968 | Monocyte Count                            | 0.347 | 0.399 | 0.869 | NA    | NA    | NA    | QT      | 0.000 | 0.000 | M    |
| PGS001969 | Neutrophil Count                          | 0.446 | 0.452 | 0.988 | NA    | NA    | NA    | QT      | 0.044 | 0.071 | M    |
| PGS001970 | Platelet Crit                             | 0.516 | 0.474 | 1.087 | NA    | NA    | NA    | QT      | 0.000 | 0.000 | F    |
| PGS001971 | Mean Platelet Volume                      | 0.654 | 0.642 | 1.019 | NA    | NA    | NA    | QT      | 0.000 | 0.000 | F    |
| PGS001972 | Platelet Component Distribution Width     | 0.508 | 0.540 | 0.940 | NA    | NA    | NA    | QT      | 0.000 | 0.000 | M    |
| PGS001973 | Platelet Count                            | 0.566 | 0.514 | 1.102 | NA    | NA    | NA    | QT      | 0.000 | 0.000 | F    |
| PGS001974 | Urinary Potassium Measurement             | 0.233 | 0.225 | 1.035 | NA    | NA    | NA    | QT      | 0.005 | 0.010 | F    |
| PGS001976 | Reticulocyte Count                        | 0.303 | 0.330 | 0.920 | NA    | NA    | NA    | QT      | 0.000 | 0.000 | M    |
| PGS001979 | Triglyceride Measurement                  | 0.383 | 0.531 | 0.722 | NA    | NA    | NA    | QT      | 0.000 | 0.000 | M    |
| PGS001980 | Urea Measurement                          | 0.344 | 0.392 | 0.879 | NA    | NA    | NA    | QT      | 0.000 | 0.000 | M    |
| PGS001982 | Vitamin D Measurement                     | 0.326 | 0.334 | 0.976 | NA    | NA    | NA    | QT      | 0.004 | 0.007 | M    |
| PGS001983 | Waist Hip Ratio                           | 0.277 | 0.273 | 1.014 | NA    | NA    | NA    | QT      | 0.054 | 0.086 | None |
| PGS001984 | Whole-Body Water Mass                     | 0.256 | 0.419 | 0.610 | NA    | NA    | NA    | QT      | 0.000 | 0.000 | M    |
| PGS001986 | Lymphocyte Percentage of Leukocytes       | 0.444 | 0.435 | 1.020 | NA    | NA    | NA    | QT      | 0.000 | 0.001 | F    |
| PGS001989 | Mean Corpuscular Hemoglobin               | 0.459 | 0.450 | 1.019 | NA    | NA    | NA    | QT      | 0.000 | 0.001 | F    |
| PGS001990 | Mean Corpuscular Volume                   | 0.502 | 0.490 | 1.024 | NA    | NA    | NA    | QT      | 0.000 | 0.000 | F    |
| PGS001991 | Monocyte Percentage of Leukocytes         | 0.344 | 0.393 | 0.875 | NA    | NA    | NA    | QT      | 0.000 | 0.000 | M    |
| PGS001997 | Neutrophil Percentage of Leukocytes       | 0.424 | 0.432 | 0.981 | NA    | NA    | NA    | QT      | 0.002 | 0.003 | M    |
| PGS001998 | Phosphate Measurement                     | 0.359 | 0.414 | 0.868 | NA    | NA    | NA    | QT      | 0.000 | 0.000 | M    |
| PGS002001 | Total Blood Protein Measurement           | 0.469 | 0.470 | 0.997 | NA    | NA    | NA    | QT      | 0.617 | 0.702 | None |
| PGS002003 | Mean Reticulocyte Volume                  | 0.447 | 0.450 | 0.992 | NA    | NA    | NA    | QT      | 0.161 | 0.231 | None |
| PGS002009 | Systolic Blood Pressure                   | 0.436 | 0.380 | 1.146 | NA    | NA    | NA    | QT      | 0.000 | 0.000 | F    |
| PGS002010 | Urate Measurement                         | 0.438 | 0.427 | 1.028 | NA    | NA    | NA    | QT      | 0.000 | 0.000 | F    |
| PGS002011 | Alcohol Consumption Measurement           | 0.009 | 0.015 | 0.588 | NA    | NA    | NA    | QT      | 0.422 | 0.524 | None |
| PGS002013 | Colorectal Cancer                         | 0.983 | 1.056 | 0.932 | 2.674 | 2.874 | 0.930 | Disease | 0.001 | 0.002 | M    |
| PGS002014 | Skin Carcinoma                            | 0.679 | 0.670 | 1.013 | 1.971 | 1.954 | 1.009 | Disease | 0.441 | 0.542 | None |
| PGS002017 | Urinary Bladder Carcinoma                 | 1.078 | 1.053 | 1.024 | 2.940 | 2.868 | 1.025 | Disease | 0.427 | 0.529 | None |
| PGS002018 | Thyroid Carcinoma                         | 1.145 | 1.173 | 0.976 | 3.141 | 3.231 | 0.972 | Disease | 0.676 | 0.752 | None |
| PGS002024 | Hypothyroidism                            | 0.956 | 0.901 | 1.061 | 2.601 | 2.463 | 1.056 | Disease | 0.000 | 0.000 | F    |
| PGS002025 | Type 1 Diabetes Mellitus                  | 0.634 | 0.529 | 1.200 | 1.885 | 1.696 | 1.111 | Disease | 0.000 | 0.000 | F    |
| PGS002026 | Type 2 Diabetes Mellitus                  | 1.022 | 1.067 | 0.958 | 2.780 | 2.906 | 0.957 | Disease | 0.000 | 0.000 | M    |
| PGS002027 | Diabetic Retinopathy                      | 0.558 | 0.575 | 0.970 | 1.747 | 1.778 | 0.983 | Disease | 0.494 | 0.590 | None |
| PGS002030 | Gout                                      | 0.394 | 0.472 | 0.835 | 1.483 | 1.603 | 0.925 | Disease | 0.001 | 0.002 | M    |
| PGS002035 | Dementia                                  | 0.569 | 0.437 | 1.302 | 1.766 | 1.547 | 1.141 | Disease | 0.000 | 0.000 | F    |
| PGS002038 | Multiple Sclerosis                        | 0.626 | 0.623 | 1.004 | 1.870 | 1.865 | 1.003 | Disease | 0.947 | 0.966 | None |
| PGS002041 | Age-Related Macular Degeneration          | 0.345 | 0.291 | 1.183 | 1.411 | 1.338 | 1.055 | Disease | 0.005 | 0.009 | F    |
| PGS002043 | Glaucoma                                  | 0.931 | 0.946 | 0.984 | 2.537 | 2.575 | 0.985 | Disease | 0.412 | 0.515 | None |
| PGS002044 | Cataract                                  | 0.493 | 0.576 | 0.856 | 1.638 | 1.779 | 0.921 | Disease | 0.000 | 0.000 | M    |
| PGS002047 | Hypertension                              | 0.892 | 0.863 | 1.033 | 2.440 | 2.371 | 1.029 | Disease | 0.000 | 0.001 | F    |
| PGS002048 | Coronary Artery Disease                   | 0.563 | 0.808 | 0.697 | 1.757 | 2.243 | 0.783 | Disease | 0.000 | 0.000 | M    |
| PGS002050 | Atrial Fibrillation                       | 0.629 | 0.729 | 0.863 | 1.876 | 2.073 | 0.905 | Disease | 0.000 | 0.000 | M    |
| PGS002054 | Abdominal Aortic Aneurysm                 | 0.918 | 0.936 | 0.980 | 2.504 | 2.551 | 0.982 | Disease | 0.539 | 0.631 | None |
| PGS002057 | Varicose Veins                            | 1.246 | 1.162 | 1.072 | 3.477 | 3.197 | 1.088 | Disease | 0.000 | 0.000 | F    |
| PGS002061 | Asthma                                    | 0.877 | 0.914 | 0.959 | 2.403 | 2.495 | 0.963 | Disease | 0.001 | 0.001 | M    |
| PGS002062 | Chronic Obstructive Pulmonary Disease     | 0.967 | 1.030 | 0.938 | 2.630 | 2.802 | 0.939 | Disease | 0.000 | 0.000 | M    |
| PGS002065 | Inguinal Hernia                           | 0.835 | 0.923 | 0.905 | 2.306 | 2.516 | 0.917 | Disease | 0.000 | 0.000 | M    |
| PGS002066 | Ulcerative Colitis                        | 1.294 | 1.303 | 0.993 | 3.646 | 3.680 | 0.991 | Disease | 0.739 | 0.802 | None |
| PGS002067 | Celiac Disease                            | 0.999 | 1.000 | 0.999 | 2.716 | 2.718 | 0.999 | Disease | 0.978 | 0.984 | None |
| PGS002072 | Cholecystitis                             | 0.538 | 0.477 | 1.128 | 1.712 | 1.611 | 1.063 | Disease | 0.000 | 0.000 | F    |
| PGS002082 | Systemic Lupus Erythematosus              | 1.130 | 1.078 | 1.048 | 3.096 | 2.939 | 1.054 | Disease | 0.466 | 0.565 | None |
| PGS002083 | Psoriasis                                 | 0.458 | 0.457 | 1.001 | 1.580 | 1.579 | 1.001 | Disease | 0.974 | 0.982 | None |
| PGS002088 | Rheumatoid Arthritis                      | 0.350 | 0.352 | 0.992 | 1.418 | 1.422 | 0.997 | Disease | 0.888 | 0.924 | None |
| PGS002089 | Ankylosing Spondylitis                    | 0.535 | 0.695 | 0.769 | 1.707 | 2.004 | 0.852 | Disease | 0.000 | 0.000 | M    |

|           |                                                 |        |        |       |       |       |       |         |       |       |      |
|-----------|-------------------------------------------------|--------|--------|-------|-------|-------|-------|---------|-------|-------|------|
| PGS002094 | Osteoarthritis                                  | 0.417  | 0.439  | 0.949 | 1.517 | 1.552 | 0.978 | Disease | 0.002 | 0.003 | M    |
| PGS002095 | Osteoporosis                                    | 0.661  | 0.601  | 1.099 | 1.936 | 1.825 | 1.061 | Disease | 0.001 | 0.002 | F    |
| PGS002099 | Serum Albumin Measurement                       | 0.402  | 0.397  | 1.011 | NA    | NA    | NA    | QT      | 0.101 | 0.153 | None |
| PGS002101 | Apolipoprotein A1 Measurement                   | 0.408  | 0.330  | 1.234 | NA    | NA    | NA    | QT      | 0.000 | 0.000 | F    |
| PGS002102 | Apolipoprotein B Measurement                    | 0.362  | 0.302  | 1.198 | NA    | NA    | NA    | QT      | 0.000 | 0.000 | F    |
| PGS002105 | Birth Weight                                    | 0.384  | 0.407  | 0.946 | NA    | NA    | NA    | QT      | 0.000 | 0.000 | M    |
| PGS002106 | Calcium Measurement                             | 0.378  | 0.353  | 1.071 | NA    | NA    | NA    | QT      | 0.000 | 0.000 | F    |
| PGS002107 | Celiac Disease                                  | 0.909  | 0.918  | 0.989 | 2.481 | 2.505 | 0.990 | Disease | 0.714 | 0.782 | None |
| PGS002108 | Total Cholesterol Measurement                   | 0.350  | 0.311  | 1.123 | NA    | NA    | NA    | QT      | 0.000 | 0.000 | F    |
| PGS002114 | Diastolic Blood Pressure                        | 0.432  | 0.398  | 1.085 | NA    | NA    | NA    | QT      | 0.000 | 0.000 | F    |
| PGS002115 | Alcohol Consumption Measurement                 | 0.067  | 0.061  | 1.101 | NA    | NA    | NA    | QT      | 0.425 | 0.527 | None |
| PGS002118 | PR Interval                                     | 0.298  | 0.366  | 0.816 | NA    | NA    | NA    | QT      | 0.000 | 0.000 | M    |
| PGS002119 | QT Interval                                     | 0.389  | 0.389  | 1.000 | NA    | NA    | NA    | QT      | 0.988 | 0.990 | None |
| PGS002120 | QT Interval                                     | 0.162  | 0.148  | 1.091 | NA    | NA    | NA    | QT      | 0.147 | 0.215 | None |
| PGS002122 | Red Blood Cell Distribution Width               | 0.366  | 0.316  | 1.160 | NA    | NA    | NA    | QT      | 0.000 | 0.000 | F    |
| PGS002123 | Erythrocyte Count                               | 0.393  | 0.434  | 0.906 | NA    | NA    | NA    | QT      | 0.000 | 0.000 | M    |
| PGS002126 | Smoking Status Measurement                      | -0.004 | -0.004 | 0.810 | NA    | NA    | NA    | QT      | 0.936 | 0.958 | None |
| PGS002133 | Fat Body Mass                                   | 0.423  | 0.337  | 1.256 | NA    | NA    | NA    | QT      | 0.000 | 0.000 | F    |
| PGS002134 | Forced Expiratory Volume                        | 0.251  | 0.407  | 0.616 | NA    | NA    | NA    | QT      | 0.000 | 0.000 | M    |
| PGS002143 | Grip Strength Measurement                       | 0.201  | 0.352  | 0.572 | NA    | NA    | NA    | QT      | 0.000 | 0.000 | M    |
| PGS002146 | Body Height                                     | 0.445  | 0.487  | 0.912 | NA    | NA    | NA    | QT      | 0.000 | 0.000 | M    |
| PGS002147 | Immature Reticulocyte Fraction Measurement      | 0.391  | 0.390  | 1.004 | NA    | NA    | NA    | QT      | 0.572 | 0.661 | None |
| PGS002149 | Insomnia                                        | 0.216  | 0.169  | 1.276 | 1.241 | 1.184 | 1.048 | Disease | 0.016 | 0.027 | F    |
| PGS002150 | Low-Density Lipoprotein Cholesterol Measuremer  | 0.383  | 0.324  | 1.181 | NA    | NA    | NA    | QT      | 0.000 | 0.000 | F    |
| PGS002152 | Alcohol Consumption Measurement                 | -0.178 | -0.237 | 0.752 | NA    | NA    | NA    | QT      | 0.000 | 0.000 | M    |
| PGS002157 | Alkaline Phosphatase Measurement                | 0.462  | 0.457  | 1.011 | NA    | NA    | NA    | QT      | 0.054 | 0.086 | None |
| PGS002158 | Serum Alanine Aminotransferase Measurement      | 0.255  | 0.356  | 0.716 | NA    | NA    | NA    | QT      | 0.000 | 0.000 | M    |
| PGS002159 | Aspartate Aminotransferase Measurement          | 0.240  | 0.308  | 0.779 | NA    | NA    | NA    | QT      | 0.000 | 0.000 | M    |
| PGS002160 | Bilirubin Measurement                           | 0.400  | 0.522  | 0.766 | NA    | NA    | NA    | QT      | 0.000 | 0.000 | M    |
| PGS002161 | Body Mass Index                                 | 0.573  | 0.454  | 1.263 | NA    | NA    | NA    | QT      | 0.000 | 0.000 | F    |
| PGS002163 | Creatinine Measurement                          | 0.279  | 0.341  | 0.817 | NA    | NA    | NA    | QT      | 0.000 | 0.000 | M    |
| PGS002164 | C-Reactive Protein Measurement                  | 0.288  | 0.232  | 1.244 | NA    | NA    | NA    | QT      | 0.000 | 0.000 | F    |
| PGS002165 | Cystatin C Measurement                          | 0.379  | 0.392  | 0.968 | NA    | NA    | NA    | QT      | 0.000 | 0.000 | M    |
| PGS002166 | QRS Duration                                    | 0.254  | 0.318  | 0.797 | NA    | NA    | NA    | QT      | 0.000 | 0.000 | M    |
| PGS002167 | Eosinophil Percentage of Leukocytes             | 0.289  | 0.338  | 0.853 | NA    | NA    | NA    | QT      | 0.000 | 0.000 | M    |
| PGS002169 | Fat Body Mass                                   | 0.398  | 0.318  | 1.250 | NA    | NA    | NA    | QT      | 0.000 | 0.000 | F    |
| PGS002170 | Glucose Measurement                             | 0.157  | 0.226  | 0.693 | NA    | NA    | NA    | QT      | 0.000 | 0.000 | M    |
| PGS002171 | HbA1c Measurement                               | 0.309  | 0.411  | 0.752 | NA    | NA    | NA    | QT      | 0.000 | 0.000 | M    |
| PGS002172 | High-Density Lipoprotein Cholesterol Measuremer | 0.513  | 0.414  | 1.239 | NA    | NA    | NA    | QT      | 0.000 | 0.000 | F    |
| PGS002173 | Bone Density                                    | 0.461  | 0.528  | 0.874 | NA    | NA    | NA    | QT      | 0.000 | 0.000 | M    |
| PGS002174 | Bone Density                                    | 0.444  | 0.510  | 0.872 | NA    | NA    | NA    | QT      | 0.000 | 0.000 | M    |
| PGS002175 | Bone Density                                    | 0.450  | 0.535  | 0.841 | NA    | NA    | NA    | QT      | 0.000 | 0.000 | M    |
| PGS002176 | Waist Hip Ratio                                 | 0.073  | 0.139  | 0.526 | NA    | NA    | NA    | QT      | 0.000 | 0.000 | M    |
| PGS002177 | Reticulocyte Measurement                        | 0.259  | 0.280  | 0.926 | NA    | NA    | NA    | QT      | 0.000 | 0.000 | M    |
| PGS002178 | IGF-1 Measurement                               | 0.464  | 0.469  | 0.991 | NA    | NA    | NA    | QT      | 0.083 | 0.128 | None |
| PGS002180 | Leukocyte Count                                 | 0.396  | 0.394  | 1.005 | NA    | NA    | NA    | QT      | 0.504 | 0.600 | None |
| PGS002181 | Lipoprotein(a) Measurement                      | 0.563  | 0.562  | 1.003 | NA    | NA    | NA    | QT      | 0.496 | 0.592 | None |
| PGS002182 | Serum Gamma-Glutamyl Transferase Measureme      | 0.249  | 0.345  | 0.723 | NA    | NA    | NA    | QT      | 0.000 | 0.000 | M    |
| PGS002183 | Lymphocyte Count                                | 0.255  | 0.243  | 1.050 | NA    | NA    | NA    | QT      | 0.000 | 0.000 | F    |
| PGS002185 | Urinary Microalbumin Measurement                | 0.149  | 0.303  | 0.490 | NA    | NA    | NA    | QT      | 0.000 | 0.000 | M    |
| PGS002186 | Monocyte Count                                  | 0.327  | 0.377  | 0.868 | NA    | NA    | NA    | QT      | 0.000 | 0.000 | M    |
| PGS002187 | Neutrophil Count                                | 0.409  | 0.413  | 0.989 | NA    | NA    | NA    | QT      | 0.092 | 0.141 | None |
| PGS002188 | Platelet Crit                                   | 0.486  | 0.445  | 1.093 | NA    | NA    | NA    | QT      | 0.000 | 0.000 | F    |
| PGS002189 | Mean Platelet Volume                            | 0.609  | 0.598  | 1.020 | NA    | NA    | NA    | QT      | 0.000 | 0.000 | F    |
| PGS002190 | Platelet Component Distribution Width           | 0.475  | 0.504  | 0.941 | NA    | NA    | NA    | QT      | 0.000 | 0.000 | M    |
| PGS002191 | Platelet Count                                  | 0.533  | 0.481  | 1.106 | NA    | NA    | NA    | QT      | 0.000 | 0.000 | F    |

|           |                                                 |        |        |       |       |       |       |         |       |       |      |
|-----------|-------------------------------------------------|--------|--------|-------|-------|-------|-------|---------|-------|-------|------|
| PGS002192 | Urinary Potassium Measurement                   | 0.318  | 0.307  | 1.034 | NA    | NA    | NA    | QT      | 0.000 | 0.000 | F    |
| PGS002194 | Reticulocyte Count                              | 0.277  | 0.300  | 0.921 | NA    | NA    | NA    | QT      | 0.000 | 0.000 | M    |
| PGS002197 | Triglyceride Measurement                        | 0.351  | 0.482  | 0.729 | NA    | NA    | NA    | QT      | 0.000 | 0.000 | M    |
| PGS002198 | Urea Measurement                                | 0.320  | 0.364  | 0.879 | NA    | NA    | NA    | QT      | 0.000 | 0.000 | M    |
| PGS002200 | Vitamin D Measurement                           | 0.289  | 0.297  | 0.972 | NA    | NA    | NA    | QT      | 0.003 | 0.006 | M    |
| PGS002201 | Waist Hip Ratio                                 | 0.266  | 0.265  | 1.003 | NA    | NA    | NA    | QT      | 0.666 | 0.745 | None |
| PGS002202 | Whole-Body Water Mass                           | 0.235  | 0.388  | 0.606 | NA    | NA    | NA    | QT      | 0.000 | 0.000 | M    |
| PGS002203 | Lymphocyte Percentage of Leukocytes             | 0.407  | 0.398  | 1.021 | NA    | NA    | NA    | QT      | 0.001 | 0.003 | F    |
| PGS002206 | Mean Corpuscular Hemoglobin                     | 0.428  | 0.423  | 1.011 | NA    | NA    | NA    | QT      | 0.059 | 0.094 | None |
| PGS002207 | Mean Corpuscular Volume                         | 0.471  | 0.462  | 1.018 | NA    | NA    | NA    | QT      | 0.001 | 0.002 | F    |
| PGS002208 | Monocyte Percentage of Leukocytes               | 0.324  | 0.368  | 0.879 | NA    | NA    | NA    | QT      | 0.000 | 0.000 | M    |
| PGS002214 | Neutrophil Percentage of Leukocytes             | 0.387  | 0.394  | 0.982 | NA    | NA    | NA    | QT      | 0.008 | 0.013 | M    |
| PGS002216 | Phosphate Measurement                           | 0.329  | 0.379  | 0.867 | NA    | NA    | NA    | QT      | 0.000 | 0.000 | M    |
| PGS002219 | Total Blood Protein Measurement                 | 0.429  | 0.432  | 0.993 | NA    | NA    | NA    | QT      | 0.264 | 0.356 | None |
| PGS002221 | Mean Reticulocyte Volume                        | 0.436  | 0.441  | 0.989 | NA    | NA    | NA    | QT      | 0.063 | 0.099 | None |
| PGS002228 | Systolic Blood Pressure                         | 0.426  | 0.370  | 1.149 | NA    | NA    | NA    | QT      | 0.000 | 0.000 | F    |
| PGS002229 | Urate Measurement                               | 0.397  | 0.375  | 1.058 | NA    | NA    | NA    | QT      | 0.000 | 0.000 | F    |
| PGS002230 | Alcohol Consumption Measurement                 | 0.009  | 0.013  | 0.656 | NA    | NA    | NA    | QT      | 0.557 | 0.648 | None |
| PGS002235 | Venous Thromboembolism                          | 0.269  | 0.368  | 0.733 | 1.309 | 1.444 | 0.906 | Disease | 0.000 | 0.000 | M    |
| PGS002237 | Chronic Kidney Disease                          | 0.309  | 0.211  | 1.467 | 1.362 | 1.235 | 1.103 | Disease | 0.000 | 0.000 | F    |
| PGS002238 | Systolic Blood Pressure                         | 0.092  | 0.080  | 1.142 | NA    | NA    | NA    | QT      | 0.000 | 0.000 | F    |
| PGS002239 | Diastolic Blood Pressure                        | 0.058  | 0.049  | 1.189 | NA    | NA    | NA    | QT      | 0.002 | 0.003 | F    |
| PGS002243 | Type 2 Diabetes Mellitus                        | 0.482  | 0.471  | 1.024 | 1.619 | 1.601 | 1.011 | Disease | 0.294 | 0.389 | None |
| PGS002244 | Coronary Artery Disease                         | 0.291  | 0.381  | 0.764 | 1.338 | 1.463 | 0.914 | Disease | 0.000 | 0.000 | M    |
| PGS002245 | Liver Fat Measurement                           | 0.163  | 0.243  | 0.672 | NA    | NA    | NA    | QT      | 0.000 | 0.000 | M    |
| PGS002246 | Melanoma                                        | 0.468  | 0.494  | 0.948 | 1.598 | 1.639 | 0.974 | Disease | 0.308 | 0.403 | None |
| PGS002247 | Melanoma                                        | 0.498  | 0.516  | 0.966 | 1.646 | 1.675 | 0.982 | Disease | 0.486 | 0.584 | None |
| PGS002248 | Asthma                                          | 0.031  | 0.018  | 1.679 | 1.031 | 1.019 | 1.013 | Disease | 0.203 | 0.283 | None |
| PGS002249 | Alzheimer's Disease                             | 0.210  | 0.218  | 0.964 | 1.234 | 1.244 | 0.992 | Disease | 0.825 | 0.868 | None |
| PGS002251 | Body Mass Index                                 | 0.130  | 0.115  | 1.128 | NA    | NA    | NA    | QT      | 0.000 | 0.000 | F    |
| PGS002252 | Colorectal Cancer                               | 0.345  | 0.365  | 0.947 | 1.412 | 1.440 | 0.981 | Disease | 0.381 | 0.482 | None |
| PGS002253 | Melanoma                                        | 0.423  | 0.413  | 1.025 | 1.527 | 1.511 | 1.010 | Disease | 0.685 | 0.758 | None |
| PGS002257 | Systolic Blood Pressure                         | 0.194  | 0.153  | 1.268 | NA    | NA    | NA    | QT      | 0.000 | 0.000 | F    |
| PGS002258 | Diastolic Blood Pressure                        | 0.179  | 0.157  | 1.141 | NA    | NA    | NA    | QT      | 0.000 | 0.000 | F    |
| PGS002259 | Stroke                                          | 0.079  | 0.093  | 0.854 | 1.083 | 1.097 | 0.987 | Disease | 0.414 | 0.517 | None |
| PGS002262 | Coronary Artery Disease                         | 0.169  | 0.242  | 0.697 | 1.184 | 1.273 | 0.929 | Disease | 0.000 | 0.000 | M    |
| PGS002264 | Pancreatic Carcinoma                            | 0.281  | 0.250  | 1.128 | 1.325 | 1.284 | 1.032 | Disease | 0.438 | 0.539 | None |
| PGS002265 | Colorectal Cancer                               | 0.382  | 0.400  | 0.954 | 1.465 | 1.492 | 0.982 | Disease | 0.411 | 0.514 | None |
| PGS002269 | Age-Related Macular Degeneration                | 0.323  | 0.288  | 1.122 | 1.381 | 1.333 | 1.036 | Disease | 0.081 | 0.125 | None |
| PGS002270 | Lung Carcinoma                                  | 0.149  | 0.122  | 1.217 | 1.161 | 1.130 | 1.027 | Disease | 0.283 | 0.376 | None |
| PGS002274 | Low-Density Lipoprotein Cholesterol Measuremer  | 0.249  | 0.205  | 1.215 | NA    | NA    | NA    | QT      | 0.000 | 0.000 | F    |
| PGS002275 | Systolic Blood Pressure                         | 0.173  | 0.139  | 1.242 | NA    | NA    | NA    | QT      | 0.000 | 0.000 | F    |
| PGS002276 | QT Interval                                     | 0.188  | 0.173  | 1.085 | NA    | NA    | NA    | QT      | 0.112 | 0.168 | None |
| PGS002277 | Type 2 Diabetes Mellitus                        | -0.149 | -0.147 | 1.014 | 0.862 | 0.864 | 0.998 | Disease | 0.838 | 0.879 | None |
| PGS002278 | Left Ventricular Ejection Fraction Measurement  | 0.100  | 0.071  | 1.405 | NA    | NA    | NA    | QT      | 0.309 | 0.404 | None |
| PGS002279 | Left Ventricular Ejection Fraction Measurement  | 0.127  | 0.124  | 1.023 | NA    | NA    | NA    | QT      | 0.919 | 0.947 | None |
| PGS002280 | Alzheimer's Disease                             | 0.387  | 0.343  | 1.128 | 1.472 | 1.409 | 1.045 | Disease | 0.204 | 0.284 | None |
| PGS002281 | Multiple Myeloma                                | -0.135 | -0.215 | 0.627 | 0.874 | 0.807 | 1.084 | Disease | 0.086 | 0.132 | None |
| PGS002282 | Non-Alcoholic Fatty Liver Disease               | 0.207  | 0.220  | 0.939 | 1.230 | 1.246 | 0.987 | Disease | 0.509 | 0.604 | None |
| PGS002283 | Non-Alcoholic Fatty Liver Disease               | 0.212  | 0.237  | 0.894 | 1.236 | 1.267 | 0.975 | Disease | 0.204 | 0.284 | None |
| PGS002284 | High-Density Lipoprotein Cholesterol Measuremer | 0.156  | 0.131  | 1.196 | NA    | NA    | NA    | QT      | 0.000 | 0.000 | F    |
| PGS002285 | Low-Density Lipoprotein Cholesterol Measuremer  | 0.140  | 0.128  | 1.093 | NA    | NA    | NA    | QT      | 0.000 | 0.000 | F    |
| PGS002286 | Total Cholesterol Measurement                   | 0.132  | 0.120  | 1.103 | NA    | NA    | NA    | QT      | 0.001 | 0.001 | F    |
| PGS002287 | Triglyceride Measurement                        | 0.058  | 0.084  | 0.685 | NA    | NA    | NA    | QT      | 0.000 | 0.000 | M    |
| PGS002289 | Alzheimer's Disease                             | 0.796  | 0.651  | 1.222 | 2.217 | 1.918 | 1.156 | Disease | 0.000 | 0.000 | F    |
| PGS002293 | Psoriasis                                       | 0.452  | 0.503  | 0.898 | 1.571 | 1.654 | 0.950 | Disease | 0.032 | 0.054 | M    |

|           |                                                 |        |        |        |       |       |       |         |       |       |      |
|-----------|-------------------------------------------------|--------|--------|--------|-------|-------|-------|---------|-------|-------|------|
| PGS002296 | Hypertension                                    | 0.445  | 0.404  | 1.103  | 1.561 | 1.497 | 1.043 | Disease | 0.000 | 0.000 | F    |
| PGS002297 | Lipoprotein(a) Measurement                      | 0.558  | 0.579  | 0.965  | NA    | NA    | NA    | QT      | 0.000 | 0.000 | M    |
| PGS002298 | Esophageal Cancer                               | 0.036  | 0.137  | 0.262  | 1.036 | 1.147 | 0.904 | Disease | 0.052 | 0.083 | None |
| PGS002301 | Melanoma                                        | 0.353  | 0.356  | 0.991  | 1.423 | 1.428 | 0.997 | Disease | 0.903 | 0.935 | None |
| PGS002303 | Non-Hodgkin's Lymphoma                          | 0.061  | 0.056  | 1.099  | 1.063 | 1.057 | 1.006 | Disease | 0.926 | 0.952 | None |
| PGS002304 | Non-Hodgkin's Lymphoma                          | -0.040 | -0.026 | 1.552  | 0.961 | 0.975 | 0.986 | Disease | 0.814 | 0.861 | None |
| PGS002305 | Chronic Lymphocytic Leukemia                    | 0.632  | 0.605  | 1.044  | 1.881 | 1.832 | 1.027 | Disease | 0.654 | 0.735 | None |
| PGS002306 | Multiple Myeloma                                | 0.266  | 0.342  | 0.778  | 1.305 | 1.407 | 0.927 | Disease | 0.101 | 0.153 | None |
| PGS002307 | Gout                                            | 0.145  | 0.153  | 0.943  | 1.156 | 1.166 | 0.991 | Disease | 0.741 | 0.804 | None |
| PGS002308 | Type 2 Diabetes Mellitus                        | 0.804  | 0.815  | 0.986  | 2.235 | 2.260 | 0.989 | Disease | 0.320 | 0.416 | None |
| PGS002311 | Asthma                                          | 0.776  | 0.818  | 0.949  | 2.173 | 2.267 | 0.959 | Disease | 0.000 | 0.000 | M    |
| PGS002313 | Body Mass Index                                 | 0.590  | 0.492  | 1.197  | NA    | NA    | NA    | QT      | 0.000 | 0.000 | F    |
| PGS002315 | Bone Density                                    | 0.519  | 0.588  | 0.882  | NA    | NA    | NA    | QT      | 0.000 | 0.000 | M    |
| PGS002321 | Type 2 Diabetes Mellitus                        | 0.903  | 0.947  | 0.953  | 2.466 | 2.578 | 0.956 | Disease | 0.000 | 0.000 | M    |
| PGS002322 | Diastolic Blood Pressure                        | 0.404  | 0.377  | 1.071  | NA    | NA    | NA    | QT      | 0.000 | 0.000 | F    |
| PGS002323 | Eczema                                          | 0.529  | 0.662  | 0.799  | 1.698 | 1.939 | 0.876 | Disease | 0.262 | 0.353 | None |
| PGS002325 | Eosinophil Count                                | 0.380  | 0.442  | 0.860  | NA    | NA    | NA    | QT      | 0.000 | 0.000 | M    |
| PGS002328 | Glucose Measurement                             | 0.172  | 0.223  | 0.768  | NA    | NA    | NA    | QT      | 0.000 | 0.000 | M    |
| PGS002329 | High-Density Lipoprotein Cholesterol Measuremer | 0.587  | 0.460  | 1.276  | NA    | NA    | NA    | QT      | 0.000 | 0.000 | F    |
| PGS002331 | HbA1c Measurement                               | 0.321  | 0.412  | 0.778  | NA    | NA    | NA    | QT      | 0.000 | 0.000 | M    |
| PGS002332 | Body Height                                     | 0.481  | 0.524  | 0.917  | NA    | NA    | NA    | QT      | 0.000 | 0.000 | M    |
| PGS002333 | Reticulocyte Count                              | 0.274  | 0.305  | 0.898  | NA    | NA    | NA    | QT      | 0.000 | 0.000 | M    |
| PGS002334 | Hypercholesterolemia                            | 0.737  | 0.732  | 1.007  | 2.091 | 2.080 | 1.005 | Disease | 0.506 | 0.601 | None |
| PGS002335 | Hypertension                                    | 0.750  | 0.684  | 1.096  | 2.118 | 1.982 | 1.068 | Disease | 0.000 | 0.000 | F    |
| PGS002336 | Hypothyroidism                                  | 1.256  | 1.033  | 1.216  | 3.511 | 2.809 | 1.250 | Disease | 0.000 | 0.000 | F    |
| PGS002337 | Low-Density Lipoprotein Cholesterol Measuremer  | 0.441  | 0.389  | 1.133  | NA    | NA    | NA    | QT      | 0.000 | 0.000 | F    |
| PGS002338 | Lymphocyte Count                                | 0.282  | 0.263  | 1.074  | NA    | NA    | NA    | QT      | 0.000 | 0.000 | F    |
| PGS002339 | Mean Corpuscular Hemoglobin                     | 0.472  | 0.466  | 1.014  | NA    | NA    | NA    | QT      | 0.008 | 0.015 | F    |
| PGS002340 | Mean Platelet Volume                            | 0.658  | 0.646  | 1.019  | NA    | NA    | NA    | QT      | 0.000 | 0.000 | F    |
| PGS002341 | Monocyte Count                                  | 0.348  | 0.411  | 0.847  | NA    | NA    | NA    | QT      | 0.000 | 0.000 | M    |
| PGS002343 | Platelet Count                                  | 0.576  | 0.515  | 1.117  | NA    | NA    | NA    | QT      | 0.000 | 0.000 | F    |
| PGS002344 | Psoriasis                                       | 0.645  | 0.673  | 0.960  | 1.907 | 1.959 | 0.973 | Disease | 0.120 | 0.179 | None |
| PGS002345 | Erythrocyte Count                               | 0.436  | 0.484  | 0.901  | NA    | NA    | NA    | QT      | 0.000 | 0.000 | M    |
| PGS002346 | Red Blood Cell Distribution Width               | 0.411  | 0.359  | 1.146  | NA    | NA    | NA    | QT      | 0.000 | 0.000 | F    |
| PGS002348 | Smoking Status Measurement                      | 0.038  | 0.036  | 1.041  | NA    | NA    | NA    | QT      | 0.885 | 0.922 | None |
| PGS002349 | Systolic Blood Pressure                         | 0.427  | 0.376  | 1.136  | NA    | NA    | NA    | QT      | 0.000 | 0.000 | F    |
| PGS002352 | Total Cholesterol Measurement                   | 0.395  | 0.360  | 1.098  | NA    | NA    | NA    | QT      | 0.000 | 0.000 | F    |
| PGS002353 | Triglyceride Measurement                        | 0.379  | 0.530  | 0.715  | NA    | NA    | NA    | QT      | 0.000 | 0.000 | M    |
| PGS002354 | Type 2 Diabetes Mellitus                        | 0.881  | 0.935  | 0.942  | 2.414 | 2.548 | 0.948 | Disease | 0.000 | 0.000 | M    |
| PGS002355 | Vitamin D Measurement                           | 0.377  | 0.386  | 0.977  | NA    | NA    | NA    | QT      | 0.001 | 0.002 | M    |
| PGS002356 | Waist Hip Ratio                                 | 0.314  | 0.205  | 1.530  | NA    | NA    | NA    | QT      | 0.000 | 0.000 | F    |
| PGS002357 | Leukocyte Count                                 | 0.413  | 0.408  | 1.011  | NA    | NA    | NA    | QT      | 0.088 | 0.135 | None |
| PGS002358 | Asthma                                          | 0.005  | 0.008  | 0.719  | 1.006 | 1.008 | 0.998 | Disease | 0.825 | 0.869 | None |
| PGS002360 | Body Mass Index                                 | 0.072  | 0.068  | 1.052  | NA    | NA    | NA    | QT      | 0.207 | 0.288 | None |
| PGS002362 | Diastolic Blood Pressure                        | 0.031  | 0.026  | 1.196  | NA    | NA    | NA    | QT      | 0.085 | 0.131 | None |
| PGS002363 | Eczema                                          | -0.028 | 0.039  | -0.713 | 0.973 | 1.040 | 0.936 | Disease | 0.581 | 0.669 | None |
| PGS002364 | Eosinophil Count                                | 0.057  | 0.068  | 0.837  | NA    | NA    | NA    | QT      | 0.000 | 0.000 | M    |
| PGS002365 | Glucose Measurement                             | 0.025  | 0.030  | 0.819  | NA    | NA    | NA    | QT      | 0.155 | 0.224 | None |
| PGS002366 | High-Density Lipoprotein Cholesterol Measuremer | 0.163  | 0.130  | 1.254  | NA    | NA    | NA    | QT      | 0.000 | 0.000 | F    |
| PGS002367 | HbA1c Measurement                               | 0.034  | 0.047  | 0.733  | NA    | NA    | NA    | QT      | 0.000 | 0.000 | M    |
| PGS002368 | Body Height                                     | 0.126  | 0.135  | 0.931  | NA    | NA    | NA    | QT      | 0.000 | 0.000 | M    |
| PGS002369 | Low-Density Lipoprotein Cholesterol Measuremer  | 0.120  | 0.099  | 1.218  | NA    | NA    | NA    | QT      | 0.000 | 0.000 | F    |
| PGS002370 | Lymphocyte Count                                | 0.034  | 0.030  | 1.113  | NA    | NA    | NA    | QT      | 0.252 | 0.343 | None |
| PGS002371 | Mean Corpuscular Hemoglobin                     | 0.096  | 0.095  | 1.009  | NA    | NA    | NA    | QT      | 0.759 | 0.816 | None |
| PGS002372 | Monocyte Count                                  | 0.055  | 0.062  | 0.891  | NA    | NA    | NA    | QT      | 0.018 | 0.031 | M    |
| PGS002373 | Platelet Count                                  | 0.110  | 0.098  | 1.118  | NA    | NA    | NA    | QT      | 0.000 | 0.000 | F    |

|           |                                                  |       |       |       |       |       |       |         |       |       |      |
|-----------|--------------------------------------------------|-------|-------|-------|-------|-------|-------|---------|-------|-------|------|
| PGS002374 | Erythrocyte Count                                | 0.089 | 0.098 | 0.914 | NA    | NA    | NA    | QT      | 0.001 | 0.001 | M    |
| PGS002375 | Smoking Status Measurement                       | 0.014 | 0.005 | 3.120 | NA    | NA    | NA    | QT      | 0.341 | 0.438 | None |
| PGS002376 | Systolic Blood Pressure                          | 0.034 | 0.028 | 1.219 | NA    | NA    | NA    | QT      | 0.028 | 0.047 | F    |
| PGS002377 | Total Cholesterol Measurement                    | 0.098 | 0.090 | 1.097 | NA    | NA    | NA    | QT      | 0.018 | 0.031 | F    |
| PGS002378 | Triglyceride Measurement                         | 0.083 | 0.118 | 0.704 | NA    | NA    | NA    | QT      | 0.000 | 0.000 | M    |
| PGS002379 | Type 2 Diabetes Mellitus                         | 0.199 | 0.217 | 0.920 | 1.221 | 1.242 | 0.983 | Disease | 0.098 | 0.149 | None |
| PGS002380 | Leukocyte Count                                  | 0.051 | 0.048 | 1.054 | NA    | NA    | NA    | QT      | 0.370 | 0.470 | None |
| PGS002383 | Asthma                                           | 0.055 | 0.068 | 0.803 | 1.057 | 1.071 | 0.987 | Disease | 0.112 | 0.167 | None |
| PGS002385 | Body Mass Index                                  | 0.311 | 0.271 | 1.150 | NA    | NA    | NA    | QT      | 0.000 | 0.000 | F    |
| PGS002387 | Bone Density                                     | 0.363 | 0.403 | 0.902 | NA    | NA    | NA    | QT      | 0.000 | 0.000 | M    |
| PGS002393 | Type 2 Diabetes Mellitus                         | 0.016 | 0.019 | 0.822 | 1.016 | 1.019 | 0.997 | Disease | 0.640 | 0.723 | None |
| PGS002394 | Diastolic Blood Pressure                         | 0.225 | 0.204 | 1.104 | NA    | NA    | NA    | QT      | 0.000 | 0.000 | F    |
| PGS002395 | Eczema                                           | 0.150 | 0.194 | 0.773 | 1.162 | 1.214 | 0.957 | Disease | 0.602 | 0.689 | None |
| PGS002397 | Eosinophil Count                                 | 0.246 | 0.284 | 0.865 | NA    | NA    | NA    | QT      | 0.000 | 0.000 | M    |
| PGS002400 | Glucose Measurement                              | 0.016 | 0.013 | 1.215 | NA    | NA    | NA    | QT      | 0.473 | 0.571 | None |
| PGS002401 | High-Density Lipoprotein Cholesterol Measurement | 0.360 | 0.291 | 1.237 | NA    | NA    | NA    | QT      | 0.000 | 0.000 | F    |
| PGS002403 | HbA1c Measurement                                | 0.083 | 0.108 | 0.768 | NA    | NA    | NA    | QT      | 0.000 | 0.000 | M    |
| PGS002404 | Body Height                                      | 0.363 | 0.396 | 0.918 | NA    | NA    | NA    | QT      | 0.000 | 0.000 | M    |
| PGS002405 | Reticulocyte Count                               | 0.176 | 0.195 | 0.901 | NA    | NA    | NA    | QT      | 0.000 | 0.000 | M    |
| PGS002406 | Hypercholesterolemia                             | 0.095 | 0.111 | 0.858 | 1.100 | 1.117 | 0.984 | Disease | 0.027 | 0.045 | M    |
| PGS002407 | Hypertension                                     | 0.359 | 0.340 | 1.056 | 1.431 | 1.404 | 1.019 | Disease | 0.006 | 0.010 | F    |
| PGS002408 | Hypothyroidism                                   | 0.104 | 0.090 | 1.160 | 1.110 | 1.094 | 1.014 | Disease | 0.317 | 0.412 | None |
| PGS002409 | Low-Density Lipoprotein Cholesterol Measurement  | 0.310 | 0.262 | 1.182 | NA    | NA    | NA    | QT      | 0.000 | 0.000 | F    |
| PGS002410 | Lymphocyte Count                                 | 0.166 | 0.155 | 1.072 | NA    | NA    | NA    | QT      | 0.000 | 0.000 | F    |
| PGS002411 | Mean Corpuscular Hemoglobin                      | 0.353 | 0.351 | 1.006 | NA    | NA    | NA    | QT      | 0.458 | 0.558 | None |
| PGS002412 | Mean Platelet Volume                             | 0.526 | 0.513 | 1.025 | NA    | NA    | NA    | QT      | 0.000 | 0.000 | F    |
| PGS002413 | Monocyte Count                                   | 0.257 | 0.301 | 0.855 | NA    | NA    | NA    | QT      | 0.000 | 0.000 | M    |
| PGS002415 | Platelet Count                                   | 0.359 | 0.330 | 1.088 | NA    | NA    | NA    | QT      | 0.000 | 0.000 | F    |
| PGS002416 | Psoriasis                                        | 0.089 | 0.080 | 1.106 | 1.093 | 1.084 | 1.009 | Disease | 0.815 | 0.862 | None |
| PGS002417 | Erythrocyte Count                                | 0.285 | 0.311 | 0.916 | NA    | NA    | NA    | QT      | 0.000 | 0.000 | M    |
| PGS002418 | Red Blood Cell Distribution Width                | 0.260 | 0.237 | 1.095 | NA    | NA    | NA    | QT      | 0.000 | 0.000 | F    |
| PGS002420 | Smoking Status Measurement                       | 0.015 | 0.002 | 9.193 | NA    | NA    | NA    | QT      | 0.189 | 0.266 | None |
| PGS002421 | Systolic Blood Pressure                          | 0.193 | 0.167 | 1.153 | NA    | NA    | NA    | QT      | 0.000 | 0.000 | F    |
| PGS002424 | Total Cholesterol Measurement                    | 0.285 | 0.251 | 1.133 | NA    | NA    | NA    | QT      | 0.000 | 0.000 | F    |
| PGS002425 | Triglyceride Measurement                         | 0.163 | 0.246 | 0.663 | NA    | NA    | NA    | QT      | 0.000 | 0.000 | M    |
| PGS002426 | Type 2 Diabetes Mellitus                         | 0.015 | 0.015 | 1.010 | 1.016 | 1.015 | 1.000 | Disease | 0.984 | 0.988 | None |
| PGS002427 | Vitamin D Measurement                            | 0.196 | 0.205 | 0.956 | NA    | NA    | NA    | QT      | 0.002 | 0.003 | M    |
| PGS002428 | Waist Hip Ratio                                  | 0.196 | 0.104 | 1.886 | NA    | NA    | NA    | QT      | 0.000 | 0.000 | F    |
| PGS002429 | Leukocyte Count                                  | 0.263 | 0.259 | 1.014 | NA    | NA    | NA    | QT      | 0.195 | 0.273 | None |
| PGS002432 | Asthma                                           | 0.087 | 0.110 | 0.788 | 1.091 | 1.117 | 0.977 | Disease | 0.011 | 0.019 | M    |
| PGS002434 | Body Mass Index                                  | 0.312 | 0.269 | 1.159 | NA    | NA    | NA    | QT      | 0.000 | 0.000 | F    |
| PGS002436 | Bone Density                                     | 0.389 | 0.442 | 0.881 | NA    | NA    | NA    | QT      | 0.000 | 0.000 | M    |
| PGS002442 | Type 2 Diabetes Mellitus                         | 0.028 | 0.043 | 0.650 | 1.028 | 1.044 | 0.985 | Disease | 0.040 | 0.065 | M    |
| PGS002443 | Diastolic Blood Pressure                         | 0.223 | 0.215 | 1.033 | NA    | NA    | NA    | QT      | 0.013 | 0.022 | F    |
| PGS002444 | Eczema                                           | 0.142 | 0.116 | 1.224 | 1.152 | 1.123 | 1.026 | Disease | 0.715 | 0.783 | None |
| PGS002446 | Eosinophil Count                                 | 0.215 | 0.259 | 0.833 | NA    | NA    | NA    | QT      | 0.000 | 0.000 | M    |
| PGS002449 | Glucose Measurement                              | 0.025 | 0.022 | 1.157 | NA    | NA    | NA    | QT      | 0.380 | 0.481 | None |
| PGS002450 | High-Density Lipoprotein Cholesterol Measurement | 0.387 | 0.310 | 1.251 | NA    | NA    | NA    | QT      | 0.000 | 0.000 | F    |
| PGS002452 | HbA1c Measurement                                | 0.082 | 0.112 | 0.732 | NA    | NA    | NA    | QT      | 0.000 | 0.000 | M    |
| PGS002453 | Body Height                                      | 0.379 | 0.415 | 0.912 | NA    | NA    | NA    | QT      | 0.000 | 0.000 | M    |
| PGS002454 | Reticulocyte Count                               | 0.180 | 0.206 | 0.874 | NA    | NA    | NA    | QT      | 0.000 | 0.000 | M    |
| PGS002455 | Hypercholesterolemia                             | 0.144 | 0.187 | 0.768 | 1.154 | 1.205 | 0.958 | Disease | 0.000 | 0.000 | M    |
| PGS002456 | Hypertension                                     | 0.340 | 0.373 | 0.911 | 1.404 | 1.452 | 0.967 | Disease | 0.000 | 0.000 | M    |
| PGS002457 | Hypothyroidism                                   | 0.142 | 0.122 | 1.159 | 1.152 | 1.130 | 1.020 | Disease | 0.198 | 0.277 | None |
| PGS002458 | Low-Density Lipoprotein Cholesterol Measurement  | 0.307 | 0.276 | 1.112 | NA    | NA    | NA    | QT      | 0.000 | 0.000 | F    |
| PGS002459 | Lymphocyte Count                                 | 0.115 | 0.115 | 0.996 | NA    | NA    | NA    | QT      | 0.892 | 0.926 | None |

|           |                                                  |        |        |        |       |       |       |         |       |       |      |
|-----------|--------------------------------------------------|--------|--------|--------|-------|-------|-------|---------|-------|-------|------|
| PGS002460 | Mean Corpuscular Hemoglobin                      | 0.346  | 0.349  | 0.991  | NA    | NA    | NA    | QT      | 0.234 | 0.320 | None |
| PGS002461 | Mean Platelet Volume                             | 0.524  | 0.514  | 1.018  | NA    | NA    | NA    | QT      | 0.000 | 0.000 | F    |
| PGS002462 | Monocyte Count                                   | 0.244  | 0.294  | 0.828  | NA    | NA    | NA    | QT      | 0.000 | 0.000 | M    |
| PGS002464 | Platelet Count                                   | 0.338  | 0.314  | 1.075  | NA    | NA    | NA    | QT      | 0.000 | 0.000 | F    |
| PGS002465 | Psoriasis                                        | 0.128  | 0.125  | 1.023  | 1.136 | 1.133 | 1.003 | Disease | 0.935 | 0.958 | None |
| PGS002466 | Erythrocyte Count                                | 0.290  | 0.325  | 0.892  | NA    | NA    | NA    | QT      | 0.000 | 0.000 | M    |
| PGS002467 | Red Blood Cell Distribution Width                | 0.253  | 0.228  | 1.113  | NA    | NA    | NA    | QT      | 0.000 | 0.000 | F    |
| PGS002469 | Smoking Status Measurement                       | 0.007  | -0.003 | -2.486 | NA    | NA    | NA    | QT      | 0.337 | 0.435 | None |
| PGS002470 | Systolic Blood Pressure                          | 0.188  | 0.172  | 1.093  | NA    | NA    | NA    | QT      | 0.000 | 0.000 | F    |
| PGS002473 | Total Cholesterol Measurement                    | 0.286  | 0.270  | 1.059  | NA    | NA    | NA    | QT      | 0.000 | 0.000 | F    |
| PGS002474 | Triglyceride Measurement                         | 0.142  | 0.219  | 0.649  | NA    | NA    | NA    | QT      | 0.000 | 0.000 | M    |
| PGS002475 | Type 2 Diabetes Mellitus                         | 0.026  | 0.037  | 0.699  | 1.026 | 1.038 | 0.989 | Disease | 0.127 | 0.188 | None |
| PGS002476 | Vitamin D Measurement                            | 0.178  | 0.191  | 0.932  | NA    | NA    | NA    | QT      | 0.000 | 0.000 | M    |
| PGS002477 | Waist Hip Ratio                                  | 0.215  | 0.138  | 1.554  | NA    | NA    | NA    | QT      | 0.000 | 0.000 | F    |
| PGS002478 | Leukocyte Count                                  | 0.258  | 0.258  | 0.999  | NA    | NA    | NA    | QT      | 0.961 | 0.974 | None |
| PGS002481 | Asthma                                           | 0.178  | 0.211  | 0.843  | 1.194 | 1.235 | 0.967 | Disease | 0.002 | 0.003 | M    |
| PGS002483 | Body Mass Index                                  | 0.305  | 0.263  | 1.159  | NA    | NA    | NA    | QT      | 0.000 | 0.000 | F    |
| PGS002485 | Bone Density                                     | 0.361  | 0.427  | 0.845  | NA    | NA    | NA    | QT      | 0.000 | 0.000 | M    |
| PGS002491 | Type 2 Diabetes Mellitus                         | 0.067  | 0.109  | 0.617  | 1.070 | 1.115 | 0.959 | Disease | 0.000 | 0.000 | M    |
| PGS002492 | Diastolic Blood Pressure                         | 0.158  | 0.160  | 0.987  | NA    | NA    | NA    | QT      | 0.477 | 0.575 | None |
| PGS002493 | Eczema                                           | 0.164  | 0.125  | 1.310  | 1.178 | 1.133 | 1.040 | Disease | 0.607 | 0.693 | None |
| PGS002495 | Eosinophil Count                                 | 0.186  | 0.235  | 0.788  | NA    | NA    | NA    | QT      | 0.000 | 0.000 | M    |
| PGS002498 | Glucose Measurement                              | 0.043  | 0.054  | 0.797  | NA    | NA    | NA    | QT      | 0.005 | 0.008 | M    |
| PGS002499 | High-Density Lipoprotein Cholesterol Measurement | 0.356  | 0.281  | 1.264  | NA    | NA    | NA    | QT      | 0.000 | 0.000 | F    |
| PGS002501 | HbA1c Measurement                                | 0.112  | 0.155  | 0.724  | NA    | NA    | NA    | QT      | 0.000 | 0.000 | M    |
| PGS002502 | Body Height                                      | 0.324  | 0.361  | 0.898  | NA    | NA    | NA    | QT      | 0.000 | 0.000 | M    |
| PGS002503 | Reticulocyte Count                               | 0.139  | 0.167  | 0.834  | NA    | NA    | NA    | QT      | 0.000 | 0.000 | M    |
| PGS002504 | Hypercholesterolemia                             | 0.212  | 0.292  | 0.726  | 1.236 | 1.339 | 0.923 | Disease | 0.000 | 0.000 | M    |
| PGS002505 | Hypertension                                     | 0.357  | 0.428  | 0.834  | 1.429 | 1.534 | 0.931 | Disease | 0.000 | 0.000 | M    |
| PGS002506 | Hypothyroidism                                   | 0.313  | 0.230  | 1.362  | 1.367 | 1.258 | 1.087 | Disease | 0.000 | 0.000 | F    |
| PGS002507 | Low-Density Lipoprotein Cholesterol Measurement  | 0.163  | 0.157  | 1.038  | NA    | NA    | NA    | QT      | 0.034 | 0.056 | F    |
| PGS002508 | Lymphocyte Count                                 | 0.130  | 0.131  | 0.989  | NA    | NA    | NA    | QT      | 0.638 | 0.720 | None |
| PGS002509 | Mean Corpuscular Hemoglobin                      | 0.284  | 0.292  | 0.974  | NA    | NA    | NA    | QT      | 0.005 | 0.010 | M    |
| PGS002510 | Mean Platelet Volume                             | 0.436  | 0.442  | 0.987  | NA    | NA    | NA    | QT      | 0.022 | 0.037 | M    |
| PGS002511 | Monocyte Count                                   | 0.174  | 0.222  | 0.783  | NA    | NA    | NA    | QT      | 0.000 | 0.000 | M    |
| PGS002513 | Platelet Count                                   | 0.330  | 0.304  | 1.088  | NA    | NA    | NA    | QT      | 0.000 | 0.000 | F    |
| PGS002514 | Psoriasis                                        | 0.228  | 0.301  | 0.759  | 1.257 | 1.351 | 0.930 | Disease | 0.048 | 0.077 | M    |
| PGS002515 | Erythrocyte Count                                | 0.256  | 0.303  | 0.845  | NA    | NA    | NA    | QT      | 0.000 | 0.000 | M    |
| PGS002516 | Red Blood Cell Distribution Width                | 0.252  | 0.223  | 1.130  | NA    | NA    | NA    | QT      | 0.000 | 0.000 | F    |
| PGS002518 | Smoking Status Measurement                       | -0.007 | -0.007 | 1.027  | NA    | NA    | NA    | QT      | 0.986 | 0.990 | None |
| PGS002519 | Systolic Blood Pressure                          | 0.110  | 0.109  | 1.012  | NA    | NA    | NA    | QT      | 0.626 | 0.710 | None |
| PGS002522 | Total Cholesterol Measurement                    | 0.180  | 0.189  | 0.955  | NA    | NA    | NA    | QT      | 0.018 | 0.031 | M    |
| PGS002523 | Triglyceride Measurement                         | 0.144  | 0.226  | 0.637  | NA    | NA    | NA    | QT      | 0.000 | 0.000 | M    |
| PGS002524 | Type 2 Diabetes Mellitus                         | 0.059  | 0.095  | 0.618  | 1.061 | 1.100 | 0.964 | Disease | 0.000 | 0.000 | M    |
| PGS002525 | Vitamin D Measurement                            | 0.190  | 0.207  | 0.919  | NA    | NA    | NA    | QT      | 0.000 | 0.000 | M    |
| PGS002526 | Waist Hip Ratio                                  | 0.168  | 0.134  | 1.255  | NA    | NA    | NA    | QT      | 0.000 | 0.000 | F    |
| PGS002527 | Leukocyte Count                                  | 0.192  | 0.200  | 0.962  | NA    | NA    | NA    | QT      | 0.008 | 0.014 | M    |
| PGS002530 | Asthma                                           | 0.241  | 0.299  | 0.805  | 1.272 | 1.348 | 0.943 | Disease | 0.000 | 0.000 | M    |
| PGS002532 | Body Mass Index                                  | 0.258  | 0.219  | 1.178  | NA    | NA    | NA    | QT      | 0.000 | 0.000 | F    |
| PGS002534 | Bone Density                                     | 0.339  | 0.370  | 0.916  | NA    | NA    | NA    | QT      | 0.000 | 0.000 | M    |
| PGS002540 | Type 2 Diabetes Mellitus                         | 0.012  | 0.015  | 0.827  | 1.012 | 1.015 | 0.997 | Disease | 0.724 | 0.791 | None |
| PGS002541 | Diastolic Blood Pressure                         | 0.169  | 0.150  | 1.127  | NA    | NA    | NA    | QT      | 0.000 | 0.000 | F    |
| PGS002542 | Eczema                                           | 0.338  | 0.370  | 0.913  | 1.402 | 1.448 | 0.968 | Disease | 0.786 | 0.838 | None |
| PGS002544 | Eosinophil Count                                 | 0.214  | 0.245  | 0.873  | NA    | NA    | NA    | QT      | 0.000 | 0.000 | M    |
| PGS002547 | Glucose Measurement                              | 0.012  | 0.008  | 1.502  | NA    | NA    | NA    | QT      | 0.299 | 0.393 | None |
| PGS002548 | High-Density Lipoprotein Cholesterol Measurement | 0.325  | 0.266  | 1.222  | NA    | NA    | NA    | QT      | 0.000 | 0.000 | F    |

|           |                                                 |       |       |       |       |       |       |         |       |       |      |
|-----------|-------------------------------------------------|-------|-------|-------|-------|-------|-------|---------|-------|-------|------|
| PGS002550 | HbA1c Measurement                               | 0.099 | 0.125 | 0.790 | NA    | NA    | NA    | QT      | 0.000 | 0.000 | M    |
| PGS002551 | Body Height                                     | 0.333 | 0.362 | 0.920 | NA    | NA    | NA    | QT      | 0.000 | 0.000 | M    |
| PGS002552 | Reticulocyte Count                              | 0.153 | 0.168 | 0.911 | NA    | NA    | NA    | QT      | 0.000 | 0.000 | M    |
| PGS002553 | Hypercholesterolemia                            | 0.289 | 0.295 | 0.978 | 1.335 | 1.343 | 0.994 | Disease | 0.378 | 0.479 | None |
| PGS002554 | Hypertension                                    | 0.292 | 0.260 | 1.121 | 1.339 | 1.297 | 1.032 | Disease | 0.000 | 0.000 | F    |
| PGS002555 | Hypothyroidism                                  | 0.086 | 0.076 | 1.138 | 1.090 | 1.079 | 1.011 | Disease | 0.411 | 0.514 | None |
| PGS002556 | Low-Density Lipoprotein Cholesterol Measuremer  | 0.295 | 0.245 | 1.207 | NA    | NA    | NA    | QT      | 0.000 | 0.000 | F    |
| PGS002557 | Lymphocyte Count                                | 0.142 | 0.133 | 1.071 | NA    | NA    | NA    | QT      | 0.001 | 0.003 | F    |
| PGS002558 | Mean Corpuscular Hemoglobin                     | 0.329 | 0.328 | 1.003 | NA    | NA    | NA    | QT      | 0.722 | 0.789 | None |
| PGS002559 | Mean Platelet Volume                            | 0.504 | 0.491 | 1.027 | NA    | NA    | NA    | QT      | 0.000 | 0.000 | F    |
| PGS002560 | Monocyte Count                                  | 0.236 | 0.273 | 0.866 | NA    | NA    | NA    | QT      | 0.000 | 0.000 | M    |
| PGS002562 | Platelet Count                                  | 0.403 | 0.357 | 1.128 | NA    | NA    | NA    | QT      | 0.000 | 0.000 | F    |
| PGS002563 | Psoriasis                                       | 0.040 | 0.031 | 1.290 | 1.041 | 1.031 | 1.009 | Disease | 0.820 | 0.865 | None |
| PGS002564 | Erythrocyte Count                               | 0.251 | 0.270 | 0.928 | NA    | NA    | NA    | QT      | 0.000 | 0.000 | M    |
| PGS002565 | Red Blood Cell Distribution Width               | 0.258 | 0.232 | 1.113 | NA    | NA    | NA    | QT      | 0.000 | 0.000 | F    |
| PGS002567 | Smoking Status Measurement                      | 0.013 | 0.009 | 1.447 | NA    | NA    | NA    | QT      | 0.698 | 0.769 | None |
| PGS002568 | Systolic Blood Pressure                         | 0.158 | 0.130 | 1.223 | NA    | NA    | NA    | QT      | 0.000 | 0.000 | F    |
| PGS002571 | Total Cholesterol Measurement                   | 0.264 | 0.231 | 1.144 | NA    | NA    | NA    | QT      | 0.000 | 0.000 | F    |
| PGS002572 | Triglyceride Measurement                        | 0.221 | 0.314 | 0.705 | NA    | NA    | NA    | QT      | 0.000 | 0.000 | M    |
| PGS002573 | Type 2 Diabetes Mellitus                        | 0.012 | 0.011 | 1.094 | 1.012 | 1.011 | 1.001 | Disease | 0.893 | 0.927 | None |
| PGS002574 | Vitamin D Measurement                           | 0.184 | 0.189 | 0.972 | NA    | NA    | NA    | QT      | 0.065 | 0.103 | None |
| PGS002575 | Waist Hip Ratio                                 | 0.159 | 0.070 | 2.272 | NA    | NA    | NA    | QT      | 0.000 | 0.000 | F    |
| PGS002576 | Leukocyte Count                                 | 0.217 | 0.214 | 1.016 | NA    | NA    | NA    | QT      | 0.245 | 0.334 | None |
| PGS002579 | Asthma                                          | 0.236 | 0.292 | 0.809 | 1.266 | 1.339 | 0.946 | Disease | 0.000 | 0.000 | M    |
| PGS002581 | Body Mass Index                                 | 0.224 | 0.190 | 1.179 | NA    | NA    | NA    | QT      | 0.000 | 0.000 | F    |
| PGS002583 | Bone Density                                    | 0.326 | 0.355 | 0.920 | NA    | NA    | NA    | QT      | 0.000 | 0.000 | M    |
| PGS002589 | Type 2 Diabetes Mellitus                        | 0.014 | 0.016 | 0.861 | 1.014 | 1.016 | 0.998 | Disease | 0.755 | 0.814 | None |
| PGS002590 | Diastolic Blood Pressure                        | 0.149 | 0.132 | 1.130 | NA    | NA    | NA    | QT      | 0.000 | 0.000 | F    |
| PGS002591 | Eczema                                          | 0.361 | 0.315 | 1.145 | 1.434 | 1.370 | 1.047 | Disease | 0.707 | 0.776 | None |
| PGS002593 | Eosinophil Count                                | 0.202 | 0.230 | 0.877 | NA    | NA    | NA    | QT      | 0.000 | 0.000 | M    |
| PGS002596 | Glucose Measurement                             | 0.017 | 0.017 | 1.004 | NA    | NA    | NA    | QT      | 0.986 | 0.990 | None |
| PGS002597 | High-Density Lipoprotein Cholesterol Measuremer | 0.315 | 0.259 | 1.214 | NA    | NA    | NA    | QT      | 0.000 | 0.000 | F    |
| PGS002599 | HbA1c Measurement                               | 0.114 | 0.146 | 0.782 | NA    | NA    | NA    | QT      | 0.000 | 0.000 | M    |
| PGS002600 | Body Height                                     | 0.317 | 0.344 | 0.921 | NA    | NA    | NA    | QT      | 0.000 | 0.000 | M    |
| PGS002601 | Reticulocyte Count                              | 0.145 | 0.158 | 0.914 | NA    | NA    | NA    | QT      | 0.000 | 0.000 | M    |
| PGS002602 | Hypercholesterolemia                            | 0.340 | 0.321 | 1.061 | 1.405 | 1.378 | 1.020 | Disease | 0.007 | 0.013 | F    |
| PGS002603 | Hypertension                                    | 0.259 | 0.230 | 1.125 | 1.295 | 1.259 | 1.029 | Disease | 0.000 | 0.000 | F    |
| PGS002604 | Hypothyroidism                                  | 0.093 | 0.080 | 1.155 | 1.097 | 1.084 | 1.013 | Disease | 0.321 | 0.417 | None |
| PGS002605 | Low-Density Lipoprotein Cholesterol Measuremer  | 0.288 | 0.237 | 1.214 | NA    | NA    | NA    | QT      | 0.000 | 0.000 | F    |
| PGS002606 | Lymphocyte Count                                | 0.132 | 0.124 | 1.068 | NA    | NA    | NA    | QT      | 0.004 | 0.008 | F    |
| PGS002607 | Mean Corpuscular Hemoglobin                     | 0.319 | 0.318 | 1.003 | NA    | NA    | NA    | QT      | 0.681 | 0.755 | None |
| PGS002608 | Mean Platelet Volume                            | 0.494 | 0.480 | 1.028 | NA    | NA    | NA    | QT      | 0.000 | 0.000 | F    |
| PGS002609 | Monocyte Count                                  | 0.226 | 0.260 | 0.868 | NA    | NA    | NA    | QT      | 0.000 | 0.000 | M    |
| PGS002611 | Platelet Count                                  | 0.387 | 0.342 | 1.129 | NA    | NA    | NA    | QT      | 0.000 | 0.000 | F    |
| PGS002612 | Psoriasis                                       | 0.031 | 0.022 | 1.413 | 1.031 | 1.022 | 1.009 | Disease | 0.822 | 0.867 | None |
| PGS002613 | Erythrocyte Count                               | 0.236 | 0.254 | 0.931 | NA    | NA    | NA    | QT      | 0.000 | 0.000 | M    |
| PGS002614 | Red Blood Cell Distribution Width               | 0.248 | 0.223 | 1.110 | NA    | NA    | NA    | QT      | 0.000 | 0.000 | F    |
| PGS002616 | Smoking Status Measurement                      | 0.013 | 0.005 | 2.879 | NA    | NA    | NA    | QT      | 0.398 | 0.501 | None |
| PGS002617 | Systolic Blood Pressure                         | 0.138 | 0.113 | 1.229 | NA    | NA    | NA    | QT      | 0.000 | 0.000 | F    |
| PGS002620 | Total Cholesterol Measurement                   | 0.258 | 0.226 | 1.144 | NA    | NA    | NA    | QT      | 0.000 | 0.000 | F    |
| PGS002621 | Triglyceride Measurement                        | 0.213 | 0.304 | 0.702 | NA    | NA    | NA    | QT      | 0.000 | 0.000 | M    |
| PGS002622 | Type 2 Diabetes Mellitus                        | 0.012 | 0.011 | 1.041 | 1.012 | 1.011 | 1.000 | Disease | 0.951 | 0.967 | None |
| PGS002623 | Vitamin D Measurement                           | 0.179 | 0.184 | 0.974 | NA    | NA    | NA    | QT      | 0.097 | 0.148 | None |
| PGS002624 | Waist Hip Ratio                                 | 0.146 | 0.061 | 2.421 | NA    | NA    | NA    | QT      | 0.000 | 0.000 | F    |
| PGS002625 | Leukocyte Count                                 | 0.200 | 0.198 | 1.008 | NA    | NA    | NA    | QT      | 0.595 | 0.683 | None |
| PGS002628 | Asthma                                          | 0.532 | 0.604 | 0.880 | 1.702 | 1.829 | 0.930 | Disease | 0.000 | 0.000 | M    |

|           |                                                 |       |       |       |       |       |       |         |       |       |      |
|-----------|-------------------------------------------------|-------|-------|-------|-------|-------|-------|---------|-------|-------|------|
| PGS002630 | Body Mass Index                                 | 0.425 | 0.360 | 1.180 | NA    | NA    | NA    | QT      | 0.000 | 0.000 | F    |
| PGS002632 | Bone Density                                    | 0.443 | 0.487 | 0.908 | NA    | NA    | NA    | QT      | 0.000 | 0.000 | M    |
| PGS002638 | Type 2 Diabetes Mellitus                        | 0.711 | 0.744 | 0.956 | 2.037 | 2.104 | 0.968 | Disease | 0.003 | 0.006 | M    |
| PGS002639 | Diastolic Blood Pressure                        | 0.309 | 0.275 | 1.122 | NA    | NA    | NA    | QT      | 0.000 | 0.000 | F    |
| PGS002640 | Eczema                                          | 0.521 | 0.603 | 0.863 | 1.683 | 1.828 | 0.921 | Disease | 0.492 | 0.589 | None |
| PGS002642 | Eosinophil Count                                | 0.330 | 0.378 | 0.873 | NA    | NA    | NA    | QT      | 0.000 | 0.000 | M    |
| PGS002645 | Glucose Measurement                             | 0.146 | 0.189 | 0.776 | NA    | NA    | NA    | QT      | 0.000 | 0.000 | M    |
| PGS002646 | High-Density Lipoprotein Cholesterol Measuremer | 0.487 | 0.388 | 1.257 | NA    | NA    | NA    | QT      | 0.000 | 0.000 | F    |
| PGS002648 | HbA1c Measurement                               | 0.268 | 0.339 | 0.791 | NA    | NA    | NA    | QT      | 0.000 | 0.000 | M    |
| PGS002649 | Body Height                                     | 0.416 | 0.453 | 0.918 | NA    | NA    | NA    | QT      | 0.000 | 0.000 | M    |
| PGS002650 | Reticulocyte Count                              | 0.232 | 0.258 | 0.898 | NA    | NA    | NA    | QT      | 0.000 | 0.000 | M    |
| PGS002651 | Hypercholesterolemia                            | 0.554 | 0.543 | 1.020 | 1.741 | 1.722 | 1.011 | Disease | 0.153 | 0.222 | None |
| PGS002652 | Hypertension                                    | 0.588 | 0.532 | 1.104 | 1.800 | 1.702 | 1.057 | Disease | 0.000 | 0.000 | F    |
| PGS002653 | Hypothyroidism                                  | 0.924 | 0.808 | 1.143 | 2.518 | 2.243 | 1.123 | Disease | 0.000 | 0.000 | F    |
| PGS002654 | Low-Density Lipoprotein Cholesterol Measuremer  | 0.393 | 0.333 | 1.182 | NA    | NA    | NA    | QT      | 0.000 | 0.000 | F    |
| PGS002655 | Lymphocyte Count                                | 0.224 | 0.208 | 1.075 | NA    | NA    | NA    | QT      | 0.000 | 0.000 | F    |
| PGS002656 | Mean Corpuscular Hemoglobin                     | 0.407 | 0.404 | 1.008 | NA    | NA    | NA    | QT      | 0.230 | 0.316 | None |
| PGS002657 | Mean Platelet Volume                            | 0.627 | 0.613 | 1.022 | NA    | NA    | NA    | QT      | 0.000 | 0.000 | F    |
| PGS002658 | Monocyte Count                                  | 0.320 | 0.371 | 0.861 | NA    | NA    | NA    | QT      | 0.000 | 0.000 | M    |
| PGS002660 | Platelet Count                                  | 0.531 | 0.473 | 1.121 | NA    | NA    | NA    | QT      | 0.000 | 0.000 | F    |
| PGS002661 | Psoriasis                                       | 0.660 | 0.727 | 0.909 | 1.935 | 2.068 | 0.936 | Disease | 0.001 | 0.001 | M    |
| PGS002662 | Erythrocyte Count                               | 0.363 | 0.394 | 0.921 | NA    | NA    | NA    | QT      | 0.000 | 0.000 | M    |
| PGS002663 | Red Blood Cell Distribution Width               | 0.348 | 0.310 | 1.123 | NA    | NA    | NA    | QT      | 0.000 | 0.000 | F    |
| PGS002665 | Smoking Status Measurement                      | 0.032 | 0.025 | 1.296 | NA    | NA    | NA    | QT      | 0.473 | 0.571 | None |
| PGS002666 | Systolic Blood Pressure                         | 0.321 | 0.270 | 1.192 | NA    | NA    | NA    | QT      | 0.000 | 0.000 | F    |
| PGS002669 | Total Cholesterol Measurement                   | 0.350 | 0.307 | 1.138 | NA    | NA    | NA    | QT      | 0.000 | 0.000 | F    |
| PGS002670 | Triglyceride Measurement                        | 0.320 | 0.446 | 0.718 | NA    | NA    | NA    | QT      | 0.000 | 0.000 | M    |
| PGS002671 | Type 2 Diabetes Mellitus                        | 0.695 | 0.737 | 0.942 | 2.003 | 2.091 | 0.958 | Disease | 0.000 | 0.000 | M    |
| PGS002672 | Vitamin D Measurement                           | 0.284 | 0.293 | 0.967 | NA    | NA    | NA    | QT      | 0.001 | 0.001 | M    |
| PGS002673 | Waist Hip Ratio                                 | 0.246 | 0.131 | 1.872 | NA    | NA    | NA    | QT      | 0.000 | 0.000 | F    |
| PGS002674 | Leukocyte Count                                 | 0.341 | 0.336 | 1.017 | NA    | NA    | NA    | QT      | 0.042 | 0.068 | F    |
| PGS002677 | Asthma                                          | 0.726 | 0.775 | 0.937 | 2.067 | 2.170 | 0.953 | Disease | 0.000 | 0.000 | M    |
| PGS002679 | Body Mass Index                                 | 0.566 | 0.472 | 1.198 | NA    | NA    | NA    | QT      | 0.000 | 0.000 | F    |
| PGS002681 | Bone Density                                    | 0.493 | 0.554 | 0.890 | NA    | NA    | NA    | QT      | 0.000 | 0.000 | M    |
| PGS002687 | Type 2 Diabetes Mellitus                        | 0.887 | 0.928 | 0.956 | 2.429 | 2.529 | 0.960 | Disease | 0.000 | 0.001 | M    |
| PGS002688 | Diastolic Blood Pressure                        | 0.388 | 0.360 | 1.076 | NA    | NA    | NA    | QT      | 0.000 | 0.000 | F    |
| PGS002689 | Eczema                                          | 0.453 | 0.664 | 0.683 | 1.574 | 1.942 | 0.810 | Disease | 0.077 | 0.119 | None |
| PGS002691 | Eosinophil Count                                | 0.362 | 0.420 | 0.862 | NA    | NA    | NA    | QT      | 0.000 | 0.000 | M    |
| PGS002694 | Glucose Measurement                             | 0.163 | 0.212 | 0.767 | NA    | NA    | NA    | QT      | 0.000 | 0.000 | M    |
| PGS002695 | High-Density Lipoprotein Cholesterol Measuremer | 0.552 | 0.432 | 1.278 | NA    | NA    | NA    | QT      | 0.000 | 0.000 | F    |
| PGS002697 | HbA1c Measurement                               | 0.306 | 0.393 | 0.780 | NA    | NA    | NA    | QT      | 0.000 | 0.000 | M    |
| PGS002698 | Body Height                                     | 0.459 | 0.500 | 0.918 | NA    | NA    | NA    | QT      | 0.000 | 0.000 | M    |
| PGS002699 | Reticulocyte Count                              | 0.267 | 0.298 | 0.896 | NA    | NA    | NA    | QT      | 0.000 | 0.000 | M    |
| PGS002700 | Hypercholesterolemia                            | 0.689 | 0.678 | 1.016 | 1.993 | 1.971 | 1.011 | Disease | 0.155 | 0.225 | None |
| PGS002701 | Hypertension                                    | 0.736 | 0.673 | 1.093 | 2.087 | 1.960 | 1.065 | Disease | 0.000 | 0.000 | F    |
| PGS002702 | Hypothyroidism                                  | 1.125 | 0.944 | 1.191 | 3.080 | 2.571 | 1.198 | Disease | 0.000 | 0.000 | F    |
| PGS002703 | Low-Density Lipoprotein Cholesterol Measuremer  | 0.414 | 0.359 | 1.154 | NA    | NA    | NA    | QT      | 0.000 | 0.000 | F    |
| PGS002704 | Lymphocyte Count                                | 0.263 | 0.245 | 1.072 | NA    | NA    | NA    | QT      | 0.000 | 0.000 | F    |
| PGS002705 | Mean Corpuscular Hemoglobin                     | 0.441 | 0.435 | 1.016 | NA    | NA    | NA    | QT      | 0.007 | 0.012 | F    |
| PGS002706 | Mean Platelet Volume                            | 0.635 | 0.623 | 1.019 | NA    | NA    | NA    | QT      | 0.000 | 0.000 | F    |
| PGS002707 | Monocyte Count                                  | 0.337 | 0.394 | 0.855 | NA    | NA    | NA    | QT      | 0.000 | 0.000 | M    |
| PGS002709 | Platelet Count                                  | 0.557 | 0.499 | 1.117 | NA    | NA    | NA    | QT      | 0.000 | 0.000 | F    |
| PGS002710 | Psoriasis                                       | 0.645 | 0.702 | 0.919 | 1.906 | 2.017 | 0.945 | Disease | 0.015 | 0.026 | M    |
| PGS002711 | Erythrocyte Count                               | 0.412 | 0.454 | 0.907 | NA    | NA    | NA    | QT      | 0.000 | 0.000 | M    |
| PGS002712 | Red Blood Cell Distribution Width               | 0.382 | 0.335 | 1.139 | NA    | NA    | NA    | QT      | 0.000 | 0.000 | F    |
| PGS002714 | Smoking Status Measurement                      | 0.041 | 0.035 | 1.183 | NA    | NA    | NA    | QT      | 0.536 | 0.629 | None |

|           |                                                  |        |        |        |       |       |       |         |       |       |      |
|-----------|--------------------------------------------------|--------|--------|--------|-------|-------|-------|---------|-------|-------|------|
| PGS002715 | Systolic Blood Pressure                          | 0.404  | 0.353  | 1.144  | NA    | NA    | NA    | QT      | 0.000 | 0.000 | F    |
| PGS002718 | Total Cholesterol Measurement                    | 0.376  | 0.340  | 1.107  | NA    | NA    | NA    | QT      | 0.000 | 0.000 | F    |
| PGS002719 | Triglyceride Measurement                         | 0.365  | 0.507  | 0.719  | NA    | NA    | NA    | QT      | 0.000 | 0.000 | M    |
| PGS002720 | Type 2 Diabetes Mellitus                         | 0.854  | 0.903  | 0.946  | 2.349 | 2.467 | 0.952 | Disease | 0.000 | 0.000 | M    |
| PGS002721 | Vitamin D Measurement                            | 0.347  | 0.356  | 0.976  | NA    | NA    | NA    | QT      | 0.002 | 0.003 | M    |
| PGS002722 | Waist Hip Ratio                                  | 0.311  | 0.202  | 1.539  | NA    | NA    | NA    | QT      | 0.000 | 0.000 | F    |
| PGS002723 | Leukocyte Count                                  | 0.406  | 0.402  | 1.010  | NA    | NA    | NA    | QT      | 0.118 | 0.175 | None |
| PGS002724 | Stroke                                           | 0.237  | 0.270  | 0.878  | 1.267 | 1.309 | 0.968 | Disease | 0.048 | 0.078 | M    |
| PGS002725 | Stroke                                           | 0.164  | 0.189  | 0.865  | 1.178 | 1.208 | 0.975 | Disease | 0.119 | 0.177 | None |
| PGS002726 | Multiple Sclerosis                               | 0.720  | 0.736  | 0.978  | 2.055 | 2.088 | 0.984 | Disease | 0.708 | 0.776 | None |
| PGS002727 | Asthma                                           | 0.245  | 0.284  | 0.860  | 1.277 | 1.329 | 0.961 | Disease | 0.000 | 0.000 | M    |
| PGS002728 | Osteoarthritis                                   | 0.013  | -0.005 | -2.505 | 1.013 | 0.995 | 1.019 | Disease | 0.007 | 0.013 | F    |
| PGS002729 | Osteoarthritis                                   | 0.047  | 0.044  | 1.071  | 1.049 | 1.045 | 1.003 | Disease | 0.653 | 0.734 | None |
| PGS002731 | Alzheimer's Disease                              | 0.206  | 0.186  | 1.105  | 1.228 | 1.205 | 1.020 | Disease | 0.570 | 0.660 | None |
| PGS002732 | Serum Alanine Aminotransferase Measurement       | 0.102  | 0.170  | 0.597  | NA    | NA    | NA    | QT      | 0.000 | 0.000 | M    |
| PGS002733 | Type 2 Diabetes Mellitus                         | 0.251  | 0.271  | 0.925  | 1.285 | 1.311 | 0.980 | Disease | 0.049 | 0.078 | M    |
| PGS002734 | Systolic Blood Pressure                          | 0.115  | 0.092  | 1.253  | NA    | NA    | NA    | QT      | 0.000 | 0.000 | F    |
| PGS002738 | Alcohol Consumption Measurement                  | 0.078  | 0.118  | 0.662  | NA    | NA    | NA    | QT      | 0.000 | 0.000 | M    |
| PGS002739 | Alcohol Consumption Measurement                  | 0.027  | 0.029  | 0.918  | NA    | NA    | NA    | QT      | 0.757 | 0.815 | None |
| PGS002740 | Pancreatic Carcinoma                             | 0.054  | 0.061  | 0.880  | 1.055 | 1.063 | 0.993 | Disease | 0.871 | 0.910 | None |
| PGS002741 | Glaucoma                                         | 0.442  | 0.437  | 1.012  | 1.556 | 1.548 | 1.005 | Disease | 0.768 | 0.822 | None |
| PGS002742 | Colorectal Cancer                                | 0.322  | 0.347  | 0.930  | 1.380 | 1.414 | 0.976 | Disease | 0.278 | 0.370 | None |
| PGS002743 | Colorectal Cancer                                | 0.315  | 0.352  | 0.895  | 1.370 | 1.422 | 0.964 | Disease | 0.095 | 0.145 | None |
| PGS002744 | Colorectal Cancer                                | 0.351  | 0.380  | 0.924  | 1.421 | 1.463 | 0.972 | Disease | 0.198 | 0.277 | None |
| PGS002745 | Rheumatoid Arthritis                             | 0.262  | 0.253  | 1.035  | 1.299 | 1.288 | 1.009 | Disease | 0.681 | 0.755 | None |
| PGS002748 | Body Height                                      | 0.153  | 0.167  | 0.917  | NA    | NA    | NA    | QT      | 0.000 | 0.000 | M    |
| PGS002751 | Body Mass Index                                  | 0.023  | 0.022  | 1.037  | NA    | NA    | NA    | QT      | 0.769 | 0.824 | None |
| PGS002752 | Alcohol Consumption Measurement                  | 0.165  | 0.256  | 0.647  | NA    | NA    | NA    | QT      | 0.000 | 0.000 | M    |
| PGS002753 | Alzheimer's Disease                              | 0.817  | 0.720  | 1.134  | 2.263 | 2.054 | 1.101 | Disease | 0.002 | 0.004 | F    |
| PGS002754 | Asthma                                           | 0.754  | 0.788  | 0.958  | 2.126 | 2.198 | 0.967 | Disease | 0.002 | 0.003 | M    |
| PGS002755 | Eczema                                           | 0.167  | 0.241  | 0.692  | 1.182 | 1.273 | 0.928 | Disease | 0.537 | 0.630 | None |
| PGS002756 | Atrial Fibrillation                              | 0.723  | 0.808  | 0.895  | 2.061 | 2.243 | 0.919 | Disease | 0.000 | 0.000 | M    |
| PGS002757 | Chronic Kidney Disease                           | -0.338 | -0.239 | 1.414  | 0.713 | 0.788 | 0.906 | Disease | 0.000 | 0.000 | F    |
| PGS002758 | Colorectal Cancer                                | 0.894  | 0.993  | 0.901  | 2.445 | 2.698 | 0.906 | Disease | 0.000 | 0.000 | M    |
| PGS002761 | Glaucoma                                         | 0.854  | 0.952  | 0.897  | 2.349 | 2.591 | 0.906 | Disease | 0.000 | 0.000 | M    |
| PGS002762 | Gout                                             | 0.509  | 0.600  | 0.848  | 1.664 | 1.823 | 0.913 | Disease | 0.000 | 0.001 | M    |
| PGS002763 | Osteoarthritis                                   | 0.346  | 0.363  | 0.954  | 1.413 | 1.437 | 0.983 | Disease | 0.018 | 0.030 | M    |
| PGS002764 | Hypercholesterolemia                             | 0.470  | 0.436  | 1.078  | 1.600 | 1.546 | 1.035 | Disease | 0.000 | 0.000 | F    |
| PGS002765 | Hypertension                                     | 0.557  | 0.491  | 1.136  | 1.746 | 1.633 | 1.069 | Disease | 0.000 | 0.000 | F    |
| PGS002766 | Hypothyroidism                                   | 0.995  | 0.924  | 1.077  | 2.705 | 2.520 | 1.074 | Disease | 0.000 | 0.000 | F    |
| PGS002767 | Osteoarthritis                                   | 0.455  | 0.555  | 0.819  | 1.576 | 1.743 | 0.904 | Disease | 0.000 | 0.000 | M    |
| PGS002769 | Rheumatoid Arthritis                             | 0.342  | 0.322  | 1.063  | 1.408 | 1.379 | 1.021 | Disease | 0.306 | 0.400 | None |
| PGS002770 | Stroke                                           | 0.161  | 0.154  | 1.039  | 1.174 | 1.167 | 1.006 | Disease | 0.721 | 0.788 | None |
| PGS002771 | Type 2 Diabetes Mellitus                         | 0.895  | 0.920  | 0.973  | 2.448 | 2.510 | 0.975 | Disease | 0.031 | 0.051 | M    |
| PGS002772 | Venous Thromboembolism                           | 0.294  | 0.395  | 0.745  | 1.342 | 1.484 | 0.904 | Disease | 0.000 | 0.000 | M    |
| PGS002773 | Atrial Fibrillation                              | 0.293  | 0.339  | 0.863  | 1.340 | 1.404 | 0.954 | Disease | 0.000 | 0.000 | M    |
| PGS002774 | Atrial Fibrillation                              | 0.361  | 0.408  | 0.884  | 1.434 | 1.504 | 0.954 | Disease | 0.000 | 0.000 | M    |
| PGS002775 | Coronary Artery Disease                          | 0.230  | 0.323  | 0.713  | 1.259 | 1.381 | 0.912 | Disease | 0.000 | 0.000 | M    |
| PGS002776 | Coronary Artery Disease                          | 0.303  | 0.418  | 0.726  | 1.354 | 1.519 | 0.892 | Disease | 0.000 | 0.000 | M    |
| PGS002777 | Hypertension                                     | 0.697  | 0.646  | 1.079  | 2.008 | 1.907 | 1.053 | Disease | 0.000 | 0.000 | F    |
| PGS002778 | Hypertension                                     | 0.747  | 0.681  | 1.096  | 2.110 | 1.976 | 1.068 | Disease | 0.000 | 0.000 | F    |
| PGS002779 | Type 2 Diabetes Mellitus                         | 0.362  | 0.348  | 1.039  | 1.436 | 1.416 | 1.014 | Disease | 0.201 | 0.281 | None |
| PGS002780 | Type 2 Diabetes Mellitus                         | 0.439  | 0.435  | 1.010  | 1.551 | 1.544 | 1.004 | Disease | 0.697 | 0.768 | None |
| PGS002781 | High-Density Lipoprotein Cholesterol Measurement | 0.401  | 0.324  | 1.236  | NA    | NA    | NA    | QT      | 0.000 | 0.000 | F    |
| PGS002783 | Total Cholesterol Measurement                    | 0.291  | 0.249  | 1.168  | NA    | NA    | NA    | QT      | 0.000 | 0.000 | F    |
| PGS002784 | Triglyceride Measurement                         | 0.254  | 0.352  | 0.723  | NA    | NA    | NA    | QT      | 0.000 | 0.000 | M    |

|           |                                 |        |        |        |       |       |       |         |       |       |      |
|-----------|---------------------------------|--------|--------|--------|-------|-------|-------|---------|-------|-------|------|
| PGS002785 | Schizophrenia                   | 0.642  | 0.603  | 1.064  | 1.900 | 1.828 | 1.039 | Disease | 0.505 | 0.601 | None |
| PGS002786 | Bipolar Disorder                | 0.542  | 0.570  | 0.950  | 1.719 | 1.768 | 0.972 | Disease | 0.515 | 0.610 | None |
| PGS002787 | Bipolar Disorder                | 0.548  | 0.613  | 0.894  | 1.730 | 1.846 | 0.937 | Disease | 0.139 | 0.204 | None |
| PGS002788 | Bipolar Disorder                | 0.208  | 0.272  | 0.765  | 1.231 | 1.313 | 0.938 | Disease | 0.143 | 0.209 | None |
| PGS002794 | Venous Thromboembolism          | 0.293  | 0.402  | 0.729  | 1.341 | 1.495 | 0.897 | Disease | 0.000 | 0.000 | M    |
| PGS002800 | Body Height                     | 0.147  | 0.158  | 0.926  | NA    | NA    | NA    | QT      | 0.000 | 0.000 | M    |
| PGS002801 | Body Height                     | 0.270  | 0.290  | 0.932  | NA    | NA    | NA    | QT      | 0.000 | 0.000 | M    |
| PGS002802 | Body Height                     | 0.435  | 0.475  | 0.916  | NA    | NA    | NA    | QT      | 0.000 | 0.000 | M    |
| PGS002803 | Body Height                     | 0.254  | 0.272  | 0.933  | NA    | NA    | NA    | QT      | 0.000 | 0.000 | M    |
| PGS002804 | Body Height                     | 0.456  | 0.496  | 0.920  | NA    | NA    | NA    | QT      | 0.000 | 0.000 | M    |
| PGS002805 | Body Height                     | 0.336  | 0.364  | 0.923  | NA    | NA    | NA    | QT      | 0.000 | 0.000 | M    |
| PGS002807 | Systolic Blood Pressure         | 0.406  | 0.333  | 1.216  | NA    | NA    | NA    | QT      | 0.000 | 0.000 | F    |
| PGS002808 | Lung Carcinoma                  | 0.156  | 0.137  | 1.144  | 1.169 | 1.146 | 1.020 | Disease | 0.418 | 0.520 | None |
| PGS002809 | Coronary Artery Disease         | 0.280  | 0.393  | 0.712  | 1.323 | 1.482 | 0.893 | Disease | 0.000 | 0.000 | M    |
| PGS002810 | Glomerular Filtration Rate      | -0.104 | -0.124 | 0.843  | NA    | NA    | NA    | QT      | 0.000 | 0.000 | M    |
| PGS002811 | Adipose Tissue Measurement      | 0.165  | 0.160  | 1.033  | NA    | NA    | NA    | QT      | 0.800 | 0.851 | None |
| PGS002812 | Adipose Tissue Measurement      | 0.113  | 0.161  | 0.701  | NA    | NA    | NA    | QT      | 0.023 | 0.038 | M    |
| PGS002813 | Adipose Tissue Measurement      | 0.014  | 0.128  | 0.110  | NA    | NA    | NA    | QT      | 0.000 | 0.000 | M    |
| PGS002814 | Atrial Fibrillation             | 0.531  | 0.583  | 0.910  | 1.700 | 1.791 | 0.949 | Disease | 0.000 | 0.000 | M    |
| PGS002825 | Alcohol Consumption Measurement | 0.017  | 0.049  | 0.337  | NA    | NA    | NA    | QT      | 0.000 | 0.000 | M    |
| PGS002826 | Alcohol Consumption Measurement | 0.024  | 0.055  | 0.437  | NA    | NA    | NA    | QT      | 0.000 | 0.000 | M    |
| PGS002827 | Alcohol Consumption Measurement | 0.018  | 0.049  | 0.356  | NA    | NA    | NA    | QT      | 0.000 | 0.000 | M    |
| PGS002828 | Alcohol Consumption Measurement | 0.041  | 0.095  | 0.431  | NA    | NA    | NA    | QT      | 0.000 | 0.000 | M    |
| PGS002829 | Alcohol Consumption Measurement | 0.075  | 0.142  | 0.526  | NA    | NA    | NA    | QT      | 0.000 | 0.000 | M    |
| PGS002830 | Alcohol Consumption Measurement | 0.148  | 0.233  | 0.635  | NA    | NA    | NA    | QT      | 0.000 | 0.000 | M    |
| PGS002831 | Alcohol Consumption Measurement | 0.167  | 0.267  | 0.625  | NA    | NA    | NA    | QT      | 0.000 | 0.000 | M    |
| PGS002832 | Alcohol Consumption Measurement | 0.204  | 0.332  | 0.616  | NA    | NA    | NA    | QT      | 0.000 | 0.000 | M    |
| PGS002833 | Alcohol Consumption Measurement | 0.002  | -0.003 | -0.659 | NA    | NA    | NA    | QT      | 0.486 | 0.584 | None |
| PGS002834 | Alcohol Consumption Measurement | 0.165  | 0.257  | 0.642  | NA    | NA    | NA    | QT      | 0.000 | 0.000 | M    |
| PGS002835 | Alcohol Consumption Measurement | 0.171  | 0.268  | 0.638  | NA    | NA    | NA    | QT      | 0.000 | 0.000 | M    |
| PGS002836 | Alcohol Consumption Measurement | 0.162  | 0.256  | 0.633  | NA    | NA    | NA    | QT      | 0.000 | 0.000 | M    |
| PGS002837 | Alcohol Consumption Measurement | 0.195  | 0.315  | 0.620  | NA    | NA    | NA    | QT      | 0.000 | 0.000 | M    |
| PGS002838 | Alcohol Consumption Measurement | -0.003 | 0.002  | -1.384 | NA    | NA    | NA    | QT      | 0.531 | 0.625 | None |
| PGS002839 | Alcohol Consumption Measurement | 0.165  | 0.258  | 0.639  | NA    | NA    | NA    | QT      | 0.000 | 0.000 | M    |
| PGS002840 | Body Mass Index                 | 0.551  | 0.433  | 1.274  | NA    | NA    | NA    | QT      | 0.000 | 0.000 | F    |
| PGS002841 | Body Mass Index                 | 0.556  | 0.432  | 1.285  | NA    | NA    | NA    | QT      | 0.000 | 0.000 | F    |
| PGS002842 | Body Mass Index                 | 0.626  | 0.485  | 1.291  | NA    | NA    | NA    | QT      | 0.000 | 0.000 | F    |
| PGS002843 | Body Mass Index                 | 0.555  | 0.428  | 1.296  | NA    | NA    | NA    | QT      | 0.000 | 0.000 | F    |
| PGS002844 | Body Mass Index                 | 0.503  | 0.399  | 1.260  | NA    | NA    | NA    | QT      | 0.000 | 0.000 | F    |
| PGS002845 | Body Mass Index                 | 0.556  | 0.436  | 1.274  | NA    | NA    | NA    | QT      | 0.000 | 0.000 | F    |
| PGS002846 | Body Mass Index                 | 0.562  | 0.437  | 1.284  | NA    | NA    | NA    | QT      | 0.000 | 0.000 | F    |
| PGS002847 | Body Mass Index                 | 0.636  | 0.493  | 1.291  | NA    | NA    | NA    | QT      | 0.000 | 0.000 | F    |
| PGS002848 | Body Mass Index                 | 0.561  | 0.433  | 1.293  | NA    | NA    | NA    | QT      | 0.000 | 0.000 | F    |
| PGS002849 | Body Mass Index                 | 0.502  | 0.398  | 1.260  | NA    | NA    | NA    | QT      | 0.000 | 0.000 | F    |
| PGS002850 | Body Mass Index                 | 0.549  | 0.431  | 1.275  | NA    | NA    | NA    | QT      | 0.000 | 0.000 | F    |
| PGS002851 | Body Mass Index                 | 0.551  | 0.428  | 1.287  | NA    | NA    | NA    | QT      | 0.000 | 0.000 | F    |
| PGS002852 | Body Mass Index                 | 0.621  | 0.480  | 1.292  | NA    | NA    | NA    | QT      | 0.000 | 0.000 | F    |
| PGS002853 | Body Mass Index                 | 0.551  | 0.425  | 1.298  | NA    | NA    | NA    | QT      | 0.000 | 0.000 | F    |
| PGS002854 | Body Mass Index                 | 0.501  | 0.397  | 1.263  | NA    | NA    | NA    | QT      | 0.000 | 0.000 | F    |
| PGS002855 | Body Mass Index                 | 0.554  | 0.434  | 1.276  | NA    | NA    | NA    | QT      | 0.000 | 0.000 | F    |
| PGS002856 | Body Mass Index                 | 0.548  | 0.427  | 1.285  | NA    | NA    | NA    | QT      | 0.000 | 0.000 | F    |
| PGS002857 | Body Mass Index                 | 0.618  | 0.478  | 1.293  | NA    | NA    | NA    | QT      | 0.000 | 0.000 | F    |
| PGS002858 | Body Mass Index                 | 0.558  | 0.430  | 1.297  | NA    | NA    | NA    | QT      | 0.000 | 0.000 | F    |
| PGS002859 | Body Mass Index                 | 0.502  | 0.398  | 1.261  | NA    | NA    | NA    | QT      | 0.000 | 0.000 | F    |
| PGS002860 | C-Reactive Protein Measurement  | 0.001  | 0.001  | 0.424  | NA    | NA    | NA    | QT      | 0.800 | 0.851 | None |
| PGS002861 | C-Reactive Protein Measurement  | 0.002  | 0.000  | -9.307 | NA    | NA    | NA    | QT      | 0.465 | 0.565 | None |

|           |                                 |        |        |        |    |    |    |    |       |       |      |
|-----------|---------------------------------|--------|--------|--------|----|----|----|----|-------|-------|------|
| PGS002862 | C-Reactive Protein Measurement  | 0.002  | 0.000  | -9.307 | NA | NA | NA | QT | 0.465 | 0.565 | None |
| PGS002863 | C-Reactive Protein Measurement  | -0.001 | -0.003 | 0.385  | NA | NA | NA | QT | 0.556 | 0.648 | None |
| PGS002864 | C-Reactive Protein Measurement  | 0.361  | 0.309  | 1.167  | NA | NA | NA | QT | 0.000 | 0.000 | F    |
| PGS002865 | C-Reactive Protein Measurement  | 0.254  | 0.209  | 1.216  | NA | NA | NA | QT | 0.000 | 0.000 | F    |
| PGS002866 | C-Reactive Protein Measurement  | 0.285  | 0.242  | 1.177  | NA | NA | NA | QT | 0.000 | 0.000 | F    |
| PGS002867 | C-Reactive Protein Measurement  | 0.274  | 0.240  | 1.144  | NA | NA | NA | QT | 0.000 | 0.000 | F    |
| PGS002868 | C-Reactive Protein Measurement  | 0.275  | 0.223  | 1.234  | NA | NA | NA | QT | 0.000 | 0.000 | F    |
| PGS002869 | C-Reactive Protein Measurement  | 0.281  | 0.254  | 1.109  | NA | NA | NA | QT | 0.000 | 0.000 | F    |
| PGS002870 | C-Reactive Protein Measurement  | 0.184  | 0.156  | 1.182  | NA | NA | NA | QT | 0.000 | 0.000 | F    |
| PGS002871 | C-Reactive Protein Measurement  | 0.198  | 0.172  | 1.149  | NA | NA | NA | QT | 0.000 | 0.000 | F    |
| PGS002872 | C-Reactive Protein Measurement  | 0.263  | 0.255  | 1.034  | NA | NA | NA | QT | 0.002 | 0.004 | F    |
| PGS002873 | C-Reactive Protein Measurement  | 0.342  | 0.308  | 1.109  | NA | NA | NA | QT | 0.000 | 0.000 | F    |
| PGS002874 | C-Reactive Protein Measurement  | 0.101  | 0.080  | 1.260  | NA | NA | NA | QT | 0.000 | 0.000 | F    |
| PGS002875 | C-Reactive Protein Measurement  | 0.113  | 0.093  | 1.216  | NA | NA | NA | QT | 0.000 | 0.000 | F    |
| PGS002876 | C-Reactive Protein Measurement  | 0.113  | 0.093  | 1.216  | NA | NA | NA | QT | 0.000 | 0.000 | F    |
| PGS002877 | C-Reactive Protein Measurement  | 0.002  | 0.001  | 2.249  | NA | NA | NA | QT | 0.732 | 0.797 | None |
| PGS002878 | C-Reactive Protein Measurement  | 0.025  | 0.017  | 1.464  | NA | NA | NA | QT | 0.007 | 0.012 | F    |
| PGS002879 | C-Reactive Protein Measurement  | 0.007  | 0.006  | 1.210  | NA | NA | NA | QT | 0.692 | 0.765 | None |
| PGS002880 | C-Reactive Protein Measurement  | 0.007  | 0.004  | 1.627  | NA | NA | NA | QT | 0.339 | 0.436 | None |
| PGS002881 | C-Reactive Protein Measurement  | 0.007  | 0.004  | 1.627  | NA | NA | NA | QT | 0.339 | 0.436 | None |
| PGS002882 | C-Reactive Protein Measurement  | -0.001 | -0.001 | 1.029  | NA | NA | NA | QT | 0.993 | 0.994 | None |
| PGS002883 | C-Reactive Protein Measurement  | -0.001 | -0.004 | 0.253  | NA | NA | NA | QT | 0.325 | 0.421 | None |
| PGS002884 | C-Reactive Protein Measurement  | 0.114  | 0.090  | 1.264  | NA | NA | NA | QT | 0.000 | 0.000 | F    |
| PGS002885 | C-Reactive Protein Measurement  | 0.114  | 0.093  | 1.221  | NA | NA | NA | QT | 0.000 | 0.000 | F    |
| PGS002886 | C-Reactive Protein Measurement  | 0.114  | 0.093  | 1.221  | NA | NA | NA | QT | 0.000 | 0.000 | F    |
| PGS002887 | C-Reactive Protein Measurement  | 0.005  | 0.002  | 2.154  | NA | NA | NA | QT | 0.352 | 0.451 | None |
| PGS002888 | C-Reactive Protein Measurement  | 0.025  | 0.017  | 1.427  | NA | NA | NA | QT | 0.011 | 0.020 | F    |
| PGS002889 | Diastolic Blood Pressure        | 0.428  | 0.396  | 1.080  | NA | NA | NA | QT | 0.000 | 0.000 | F    |
| PGS002890 | Diastolic Blood Pressure        | 0.431  | 0.405  | 1.063  | NA | NA | NA | QT | 0.000 | 0.000 | F    |
| PGS002891 | Diastolic Blood Pressure        | 0.510  | 0.492  | 1.036  | NA | NA | NA | QT | 0.000 | 0.000 | F    |
| PGS002892 | Diastolic Blood Pressure        | 0.419  | 0.389  | 1.076  | NA | NA | NA | QT | 0.000 | 0.000 | F    |
| PGS002893 | Diastolic Blood Pressure        | 0.381  | 0.345  | 1.103  | NA | NA | NA | QT | 0.000 | 0.000 | F    |
| PGS002894 | Diastolic Blood Pressure        | 0.407  | 0.379  | 1.075  | NA | NA | NA | QT | 0.000 | 0.000 | F    |
| PGS002895 | Diastolic Blood Pressure        | 0.393  | 0.371  | 1.061  | NA | NA | NA | QT | 0.000 | 0.000 | F    |
| PGS002896 | Diastolic Blood Pressure        | 0.460  | 0.445  | 1.035  | NA | NA | NA | QT | 0.000 | 0.000 | F    |
| PGS002897 | Diastolic Blood Pressure        | 0.406  | 0.382  | 1.064  | NA | NA | NA | QT | 0.000 | 0.000 | F    |
| PGS002898 | Diastolic Blood Pressure        | 0.378  | 0.347  | 1.090  | NA | NA | NA | QT | 0.000 | 0.000 | F    |
| PGS002899 | Diastolic Blood Pressure        | 0.103  | 0.091  | 1.133  | NA | NA | NA | QT | 0.000 | 0.000 | F    |
| PGS002900 | Diastolic Blood Pressure        | 0.078  | 0.069  | 1.123  | NA | NA | NA | QT | 0.003 | 0.006 | F    |
| PGS002901 | Diastolic Blood Pressure        | 0.077  | 0.069  | 1.114  | NA | NA | NA | QT | 0.007 | 0.012 | F    |
| PGS002902 | Diastolic Blood Pressure        | 0.055  | 0.045  | 1.235  | NA | NA | NA | QT | 0.000 | 0.001 | F    |
| PGS002903 | Diastolic Blood Pressure        | 0.118  | 0.102  | 1.153  | NA | NA | NA | QT | 0.000 | 0.000 | F    |
| PGS002904 | Diastolic Blood Pressure        | 0.103  | 0.092  | 1.122  | NA | NA | NA | QT | 0.000 | 0.000 | F    |
| PGS002905 | Diastolic Blood Pressure        | 0.075  | 0.066  | 1.134  | NA | NA | NA | QT | 0.002 | 0.004 | F    |
| PGS002906 | Diastolic Blood Pressure        | 0.074  | 0.066  | 1.115  | NA | NA | NA | QT | 0.009 | 0.016 | F    |
| PGS002907 | Diastolic Blood Pressure        | 0.049  | 0.039  | 1.256  | NA | NA | NA | QT | 0.001 | 0.001 | F    |
| PGS002908 | Diastolic Blood Pressure        | 0.118  | 0.104  | 1.132  | NA | NA | NA | QT | 0.000 | 0.000 | F    |
| PGS002909 | Alcohol Consumption Measurement | 0.072  | 0.087  | 0.824  | NA | NA | NA | QT | 0.046 | 0.075 | M    |
| PGS002910 | Alcohol Consumption Measurement | 0.062  | 0.080  | 0.773  | NA | NA | NA | QT | 0.019 | 0.031 | M    |
| PGS002911 | Alcohol Consumption Measurement | 0.073  | 0.090  | 0.812  | NA | NA | NA | QT | 0.029 | 0.048 | M    |
| PGS002912 | Alcohol Consumption Measurement | 0.035  | 0.033  | 1.064  | NA | NA | NA | QT | 0.783 | 0.836 | None |
| PGS002913 | Alcohol Consumption Measurement | 0.073  | 0.083  | 0.871  | NA | NA | NA | QT | 0.163 | 0.234 | None |
| PGS002914 | Estradiol Measurement           | 0.339  | 0.037  | 9.056  | NA | NA | NA | QT | 0.000 | 0.000 | F    |
| PGS002915 | Estradiol Measurement           | 0.453  | 0.052  | 8.658  | NA | NA | NA | QT | 0.000 | 0.000 | F    |
| PGS002916 | Estradiol Measurement           | 0.546  | 0.066  | 8.319  | NA | NA | NA | QT | 0.000 | 0.000 | F    |
| PGS002917 | Estradiol Measurement           | 0.192  | 0.017  | 11.113 | NA | NA | NA | QT | 0.000 | 0.000 | F    |

|           |                                                 |       |       |         |    |    |    |    |       |       |      |
|-----------|-------------------------------------------------|-------|-------|---------|----|----|----|----|-------|-------|------|
| PGS002918 | Estradiol Measurement                           | 0.508 | 0.061 | 8.340   | NA | NA | NA | QT | 0.000 | 0.000 | F    |
| PGS002919 | Estradiol Measurement                           | 0.029 | 0.002 | 14.393  | NA | NA | NA | QT | 0.000 | 0.000 | F    |
| PGS002920 | Estradiol Measurement                           | 0.048 | 0.001 | 41.095  | NA | NA | NA | QT | 0.000 | 0.000 | F    |
| PGS002921 | Estradiol Measurement                           | 0.201 | 0.002 | 112.294 | NA | NA | NA | QT | 0.000 | 0.000 | F    |
| PGS002922 | Estradiol Measurement                           | 0.288 | 0.005 | 59.695  | NA | NA | NA | QT | 0.000 | 0.000 | F    |
| PGS002923 | Estradiol Measurement                           | 0.671 | 0.028 | 24.225  | NA | NA | NA | QT | 0.000 | 0.000 | F    |
| PGS002934 | Glucose Measurement                             | 0.172 | 0.234 | 0.735   | NA | NA | NA | QT | 0.000 | 0.000 | M    |
| PGS002935 | Glucose Measurement                             | 0.152 | 0.207 | 0.734   | NA | NA | NA | QT | 0.000 | 0.000 | M    |
| PGS002936 | Glucose Measurement                             | 0.151 | 0.204 | 0.740   | NA | NA | NA | QT | 0.000 | 0.000 | M    |
| PGS002937 | Glucose Measurement                             | 0.128 | 0.168 | 0.762   | NA | NA | NA | QT | 0.000 | 0.000 | M    |
| PGS002938 | Glucose Measurement                             | 0.169 | 0.226 | 0.746   | NA | NA | NA | QT | 0.000 | 0.000 | M    |
| PGS002939 | Glucose Measurement                             | 0.168 | 0.270 | 0.621   | NA | NA | NA | QT | 0.000 | 0.000 | M    |
| PGS002940 | Glucose Measurement                             | 0.121 | 0.180 | 0.677   | NA | NA | NA | QT | 0.000 | 0.000 | M    |
| PGS002941 | Glucose Measurement                             | 0.121 | 0.179 | 0.678   | NA | NA | NA | QT | 0.000 | 0.000 | M    |
| PGS002942 | Glucose Measurement                             | 0.115 | 0.191 | 0.604   | NA | NA | NA | QT | 0.000 | 0.000 | M    |
| PGS002943 | Glucose Measurement                             | 0.197 | 0.316 | 0.624   | NA | NA | NA | QT | 0.000 | 0.000 | M    |
| PGS002954 | ligh-Density Lipoprotein Cholesterol Measuremer | 0.499 | 0.406 | 1.228   | NA | NA | NA | QT | 0.000 | 0.000 | F    |
| PGS002955 | ligh-Density Lipoprotein Cholesterol Measuremer | 0.488 | 0.397 | 1.228   | NA | NA | NA | QT | 0.000 | 0.000 | F    |
| PGS002956 | ligh-Density Lipoprotein Cholesterol Measuremer | 0.542 | 0.442 | 1.224   | NA | NA | NA | QT | 0.000 | 0.000 | F    |
| PGS002957 | ligh-Density Lipoprotein Cholesterol Measuremer | 0.529 | 0.434 | 1.219   | NA | NA | NA | QT | 0.000 | 0.000 | F    |
| PGS002958 | ligh-Density Lipoprotein Cholesterol Measuremer | 0.467 | 0.377 | 1.239   | NA | NA | NA | QT | 0.000 | 0.000 | F    |
| PGS002959 | ligh-Density Lipoprotein Cholesterol Measuremer | 0.516 | 0.397 | 1.298   | NA | NA | NA | QT | 0.000 | 0.000 | F    |
| PGS002960 | ligh-Density Lipoprotein Cholesterol Measuremer | 0.510 | 0.396 | 1.290   | NA | NA | NA | QT | 0.000 | 0.000 | F    |
| PGS002961 | ligh-Density Lipoprotein Cholesterol Measuremer | 0.571 | 0.442 | 1.292   | NA | NA | NA | QT | 0.000 | 0.000 | F    |
| PGS002962 | ligh-Density Lipoprotein Cholesterol Measuremer | 0.538 | 0.421 | 1.280   | NA | NA | NA | QT | 0.000 | 0.000 | F    |
| PGS002963 | ligh-Density Lipoprotein Cholesterol Measuremer | 0.478 | 0.371 | 1.289   | NA | NA | NA | QT | 0.000 | 0.000 | F    |
| PGS002964 | Body Height                                     | 0.440 | 0.478 | 0.920   | NA | NA | NA | QT | 0.000 | 0.000 | M    |
| PGS002965 | Body Height                                     | 0.422 | 0.460 | 0.918   | NA | NA | NA | QT | 0.000 | 0.000 | M    |
| PGS002966 | Body Height                                     | 0.446 | 0.486 | 0.918   | NA | NA | NA | QT | 0.000 | 0.000 | M    |
| PGS002967 | Body Height                                     | 0.372 | 0.405 | 0.920   | NA | NA | NA | QT | 0.000 | 0.000 | M    |
| PGS002968 | Body Height                                     | 0.413 | 0.448 | 0.921   | NA | NA | NA | QT | 0.000 | 0.000 | M    |
| PGS002969 | Body Height                                     | 0.438 | 0.482 | 0.908   | NA | NA | NA | QT | 0.000 | 0.000 | M    |
| PGS002970 | Body Height                                     | 0.418 | 0.461 | 0.906   | NA | NA | NA | QT | 0.000 | 0.000 | M    |
| PGS002971 | Body Height                                     | 0.439 | 0.486 | 0.904   | NA | NA | NA | QT | 0.000 | 0.000 | M    |
| PGS002972 | Body Height                                     | 0.370 | 0.412 | 0.898   | NA | NA | NA | QT | 0.000 | 0.000 | M    |
| PGS002973 | Body Height                                     | 0.412 | 0.451 | 0.913   | NA | NA | NA | QT | 0.000 | 0.000 | M    |
| PGS002974 | Body Height                                     | 0.007 | 0.010 | 0.653   | NA | NA | NA | QT | 0.069 | 0.107 | None |
| PGS002975 | Body Height                                     | 0.006 | 0.008 | 0.809   | NA | NA | NA | QT | 0.446 | 0.547 | None |
| PGS002976 | Body Height                                     | 0.006 | 0.008 | 0.798   | NA | NA | NA | QT | 0.416 | 0.518 | None |
| PGS002977 | Body Height                                     | 0.002 | 0.000 | -6.840  | NA | NA | NA | QT | 0.247 | 0.337 | None |
| PGS002978 | Body Height                                     | 0.009 | 0.016 | 0.591   | NA | NA | NA | QT | 0.001 | 0.002 | M    |
| PGS002979 | Body Height                                     | 0.306 | 0.330 | 0.927   | NA | NA | NA | QT | 0.000 | 0.000 | M    |
| PGS002980 | Body Height                                     | 0.288 | 0.310 | 0.928   | NA | NA | NA | QT | 0.000 | 0.000 | M    |
| PGS002981 | Body Height                                     | 0.286 | 0.309 | 0.927   | NA | NA | NA | QT | 0.000 | 0.000 | M    |
| PGS002982 | Body Height                                     | 0.093 | 0.100 | 0.927   | NA | NA | NA | QT | 0.000 | 0.000 | M    |
| PGS002983 | Body Height                                     | 0.338 | 0.365 | 0.926   | NA | NA | NA | QT | 0.000 | 0.000 | M    |
| PGS002984 | Body Height                                     | 0.005 | 0.009 | 0.587   | NA | NA | NA | QT | 0.058 | 0.093 | None |
| PGS002985 | Body Height                                     | 0.007 | 0.008 | 0.809   | NA | NA | NA | QT | 0.431 | 0.532 | None |
| PGS002986 | Body Height                                     | 0.007 | 0.008 | 0.818   | NA | NA | NA | QT | 0.453 | 0.553 | None |
| PGS002987 | Body Height                                     | 0.002 | 0.001 | 2.595   | NA | NA | NA | QT | 0.501 | 0.598 | None |
| PGS002988 | Body Height                                     | 0.009 | 0.013 | 0.684   | NA | NA | NA | QT | 0.034 | 0.056 | M    |
| PGS002989 | Body Height                                     | 0.309 | 0.334 | 0.926   | NA | NA | NA | QT | 0.000 | 0.000 | M    |
| PGS002990 | Body Height                                     | 0.296 | 0.318 | 0.928   | NA | NA | NA | QT | 0.000 | 0.000 | M    |
| PGS002991 | Body Height                                     | 0.293 | 0.315 | 0.929   | NA | NA | NA | QT | 0.000 | 0.000 | M    |
| PGS002992 | Body Height                                     | 0.049 | 0.055 | 0.878   | NA | NA | NA | QT | 0.001 | 0.001 | M    |
| PGS002993 | Body Height                                     | 0.338 | 0.365 | 0.926   | NA | NA | NA | QT | 0.000 | 0.000 | M    |

|           |                                                |        |        |        |       |       |       |         |       |       |      |
|-----------|------------------------------------------------|--------|--------|--------|-------|-------|-------|---------|-------|-------|------|
| PGS002994 | Hypertension                                   | 0.753  | 0.697  | 1.080  | 2.123 | 2.008 | 1.057 | Disease | 0.000 | 0.000 | F    |
| PGS002995 | Hypertension                                   | 0.708  | 0.655  | 1.080  | 2.030 | 1.926 | 1.054 | Disease | 0.000 | 0.000 | F    |
| PGS002996 | Hypertension                                   | 0.708  | 0.655  | 1.081  | 2.030 | 1.925 | 1.054 | Disease | 0.000 | 0.000 | F    |
| PGS002997 | Hypertension                                   | 0.462  | 0.436  | 1.059  | 1.587 | 1.547 | 1.026 | Disease | 0.000 | 0.000 | F    |
| PGS002998 | Hypertension                                   | 0.685  | 0.626  | 1.094  | 1.984 | 1.870 | 1.061 | Disease | 0.000 | 0.000 | F    |
| PGS002999 | Hypertension                                   | 0.108  | 0.090  | 1.206  | 1.114 | 1.094 | 1.019 | Disease | 0.004 | 0.007 | F    |
| PGS003000 | Hypertension                                   | 0.112  | 0.095  | 1.180  | 1.118 | 1.099 | 1.017 | Disease | 0.008 | 0.014 | F    |
| PGS003001 | Hypertension                                   | 0.112  | 0.095  | 1.181  | 1.118 | 1.099 | 1.017 | Disease | 0.008 | 0.014 | F    |
| PGS003002 | Hypertension                                   | 0.011  | 0.012  | 0.938  | 1.011 | 1.012 | 0.999 | Disease | 0.910 | 0.941 | None |
| PGS003003 | Hypertension                                   | 0.110  | 0.098  | 1.123  | 1.116 | 1.103 | 1.012 | Disease | 0.061 | 0.097 | None |
| PGS003004 | Hypertension                                   | -0.004 | -0.003 | 1.285  | 0.996 | 0.997 | 0.999 | Disease | 0.892 | 0.927 | None |
| PGS003005 | Hypertension                                   | 0.019  | 0.009  | 2.048  | 1.019 | 1.009 | 1.010 | Disease | 0.135 | 0.198 | None |
| PGS003006 | Hypertension                                   | 0.005  | -0.001 | -7.641 | 1.005 | 0.999 | 1.005 | Disease | 0.407 | 0.510 | None |
| PGS003007 | Hypertension                                   | 0.003  | 0.001  | 2.385  | 1.003 | 1.001 | 1.002 | Disease | 0.760 | 0.817 | None |
| PGS003008 | Hypertension                                   | 0.016  | 0.012  | 1.368  | 1.016 | 1.012 | 1.004 | Disease | 0.502 | 0.598 | None |
| PGS003009 | Hypertension                                   | -0.004 | -0.005 | 0.830  | 0.996 | 0.995 | 1.001 | Disease | 0.900 | 0.932 | None |
| PGS003010 | Hypertension                                   | 0.015  | 0.010  | 1.509  | 1.015 | 1.010 | 1.005 | Disease | 0.443 | 0.544 | None |
| PGS003011 | Hypertension                                   | 0.000  | -0.003 | 0.109  | 1.000 | 0.997 | 1.003 | Disease | 0.668 | 0.746 | None |
| PGS003012 | Hypertension                                   | 0.000  | 0.001  | -0.313 | 1.000 | 1.001 | 0.998 | Disease | 0.807 | 0.855 | None |
| PGS003013 | Hypertension                                   | 0.020  | 0.010  | 2.045  | 1.020 | 1.010 | 1.010 | Disease | 0.114 | 0.171 | None |
| PGS003014 | Hypertension                                   | 0.118  | 0.106  | 1.109  | 1.125 | 1.112 | 1.012 | Disease | 0.072 | 0.113 | None |
| PGS003015 | Hypertension                                   | 0.120  | 0.111  | 1.083  | 1.128 | 1.118 | 1.009 | Disease | 0.158 | 0.227 | None |
| PGS003016 | Hypertension                                   | 0.120  | 0.111  | 1.083  | 1.128 | 1.117 | 1.009 | Disease | 0.156 | 0.225 | None |
| PGS003017 | Hypertension                                   | 0.012  | 0.014  | 0.870  | 1.012 | 1.014 | 0.998 | Disease | 0.778 | 0.832 | None |
| PGS003018 | Hypertension                                   | 0.123  | 0.111  | 1.102  | 1.131 | 1.118 | 1.011 | Disease | 0.078 | 0.121 | None |
| PGS003019 | Hypertension                                   | 0.022  | 0.017  | 1.296  | 1.022 | 1.017 | 1.005 | Disease | 0.438 | 0.539 | None |
| PGS003020 | Hypertension                                   | -0.005 | 0.004  | -1.382 | 0.995 | 1.004 | 0.991 | Disease | 0.153 | 0.222 | None |
| PGS003021 | Hypertension                                   | -0.005 | 0.004  | -1.382 | 0.995 | 1.004 | 0.991 | Disease | 0.153 | 0.222 | None |
| PGS003022 | Hypertension                                   | 0.003  | 0.007  | 0.393  | 1.003 | 1.007 | 0.996 | Disease | 0.536 | 0.629 | None |
| PGS003023 | Hypertension                                   | 0.015  | 0.006  | 2.507  | 1.015 | 1.006 | 1.009 | Disease | 0.175 | 0.249 | None |
| PGS003024 | Hypertension                                   | 0.015  | 0.009  | 1.556  | 1.015 | 1.010 | 1.005 | Disease | 0.416 | 0.518 | None |
| PGS003025 | Hypertension                                   | -0.005 | 0.002  | -2.536 | 0.995 | 1.002 | 0.993 | Disease | 0.296 | 0.390 | None |
| PGS003026 | Hypertension                                   | -0.005 | 0.002  | -2.536 | 0.995 | 1.002 | 0.993 | Disease | 0.296 | 0.390 | None |
| PGS003027 | Hypertension                                   | 0.002  | 0.008  | 0.248  | 1.002 | 1.008 | 0.994 | Disease | 0.375 | 0.476 | None |
| PGS003028 | Hypertension                                   | 0.013  | 0.000  | 36.918 | 1.013 | 1.000 | 1.013 | Disease | 0.053 | 0.085 | None |
| PGS003029 | .ow-Density Lipoprotein Cholesterol Measuremer | 0.381  | 0.343  | 1.110  | NA    | NA    | NA    | QT      | 0.000 | 0.000 | F    |
| PGS003030 | .ow-Density Lipoprotein Cholesterol Measuremer | 0.320  | 0.273  | 1.173  | NA    | NA    | NA    | QT      | 0.000 | 0.000 | F    |
| PGS003031 | .ow-Density Lipoprotein Cholesterol Measuremer | 0.335  | 0.287  | 1.164  | NA    | NA    | NA    | QT      | 0.000 | 0.000 | F    |
| PGS003032 | .ow-Density Lipoprotein Cholesterol Measuremer | 0.420  | 0.383  | 1.096  | NA    | NA    | NA    | QT      | 0.000 | 0.000 | F    |
| PGS003033 | .ow-Density Lipoprotein Cholesterol Measuremer | 0.393  | 0.354  | 1.108  | NA    | NA    | NA    | QT      | 0.000 | 0.000 | F    |
| PGS003034 | .ow-Density Lipoprotein Cholesterol Measuremer | 0.382  | 0.341  | 1.121  | NA    | NA    | NA    | QT      | 0.000 | 0.000 | F    |
| PGS003035 | .ow-Density Lipoprotein Cholesterol Measuremer | 0.326  | 0.277  | 1.177  | NA    | NA    | NA    | QT      | 0.000 | 0.000 | F    |
| PGS003036 | .ow-Density Lipoprotein Cholesterol Measuremer | 0.341  | 0.292  | 1.167  | NA    | NA    | NA    | QT      | 0.000 | 0.000 | F    |
| PGS003037 | .ow-Density Lipoprotein Cholesterol Measuremer | 0.447  | 0.407  | 1.100  | NA    | NA    | NA    | QT      | 0.000 | 0.000 | F    |
| PGS003038 | .ow-Density Lipoprotein Cholesterol Measuremer | 0.395  | 0.354  | 1.118  | NA    | NA    | NA    | QT      | 0.000 | 0.000 | F    |
| PGS003044 | Smoking Status Measurement                     | -0.008 | -0.004 | 1.793  | NA    | NA    | NA    | QT      | 0.738 | 0.802 | None |
| PGS003045 | Smoking Status Measurement                     | -0.005 | -0.007 | 0.704  | NA    | NA    | NA    | QT      | 0.839 | 0.880 | None |
| PGS003046 | Smoking Status Measurement                     | -0.004 | -0.011 | 0.381  | NA    | NA    | NA    | QT      | 0.522 | 0.616 | None |
| PGS003047 | Smoking Status Measurement                     | -0.013 | 0.005  | -2.748 | NA    | NA    | NA    | QT      | 0.082 | 0.127 | None |
| PGS003048 | Smoking Status Measurement                     | -0.009 | -0.002 | 3.780  | NA    | NA    | NA    | QT      | 0.523 | 0.617 | None |
| PGS003049 | Smoking Status Measurement                     | 0.039  | 0.033  | 1.206  | NA    | NA    | NA    | QT      | 0.511 | 0.606 | None |
| PGS003050 | Smoking Status Measurement                     | 0.029  | 0.021  | 1.375  | NA    | NA    | NA    | QT      | 0.435 | 0.535 | None |
| PGS003051 | Smoking Status Measurement                     | 0.025  | 0.017  | 1.508  | NA    | NA    | NA    | QT      | 0.402 | 0.505 | None |
| PGS003052 | Smoking Status Measurement                     | 0.027  | 0.038  | 0.709  | NA    | NA    | NA    | QT      | 0.282 | 0.376 | None |
| PGS003053 | Smoking Status Measurement                     | 0.046  | 0.046  | 1.019  | NA    | NA    | NA    | QT      | 0.934 | 0.958 | None |
| PGS003054 | Smoking Status Measurement                     | -0.004 | 0.007  | -0.643 | NA    | NA    | NA    | QT      | 0.288 | 0.382 | None |

|           |                            |        |        |        |       |       |       |         |       |       |      |
|-----------|----------------------------|--------|--------|--------|-------|-------|-------|---------|-------|-------|------|
| PGS003055 | Smoking Status Measurement | -0.002 | 0.003  | -0.530 | NA    | NA    | NA    | QT      | 0.612 | 0.698 | None |
| PGS003056 | Smoking Status Measurement | -0.002 | 0.004  | -0.618 | NA    | NA    | NA    | QT      | 0.524 | 0.617 | None |
| PGS003057 | Smoking Status Measurement | 0.003  | 0.020  | 0.152  | NA    | NA    | NA    | QT      | 0.100 | 0.152 | None |
| PGS003058 | Smoking Status Measurement | 0.000  | 0.005  | -0.067 | NA    | NA    | NA    | QT      | 0.582 | 0.670 | None |
| PGS003059 | Smoking Status Measurement | 0.032  | 0.036  | 0.886  | NA    | NA    | NA    | QT      | 0.687 | 0.760 | None |
| PGS003060 | Smoking Status Measurement | 0.028  | 0.028  | 1.009  | NA    | NA    | NA    | QT      | 0.981 | 0.986 | None |
| PGS003061 | Smoking Status Measurement | 0.024  | 0.024  | 0.973  | NA    | NA    | NA    | QT      | 0.949 | 0.967 | None |
| PGS003062 | Smoking Status Measurement | -0.004 | -0.007 | 0.591  | NA    | NA    | NA    | QT      | 0.765 | 0.822 | None |
| PGS003063 | Smoking Status Measurement | 0.030  | 0.041  | 0.749  | NA    | NA    | NA    | QT      | 0.320 | 0.415 | None |
| PGS003064 | Smoking Status Measurement | 0.026  | 0.032  | 0.814  | NA    | NA    | NA    | QT      | 0.567 | 0.657 | None |
| PGS003065 | Smoking Status Measurement | 0.027  | 0.028  | 0.958  | NA    | NA    | NA    | QT      | 0.909 | 0.940 | None |
| PGS003066 | Smoking Status Measurement | 0.015  | 0.024  | 0.620  | NA    | NA    | NA    | QT      | 0.373 | 0.474 | None |
| PGS003067 | Smoking Status Measurement | -0.006 | -0.004 | 1.361  | NA    | NA    | NA    | QT      | 0.875 | 0.913 | None |
| PGS003068 | Smoking Status Measurement | 0.030  | 0.043  | 0.695  | NA    | NA    | NA    | QT      | 0.204 | 0.285 | None |
| PGS003069 | Systolic Blood Pressure    | 0.417  | 0.357  | 1.167  | NA    | NA    | NA    | QT      | 0.000 | 0.000 | F    |
| PGS003070 | Systolic Blood Pressure    | 0.434  | 0.378  | 1.147  | NA    | NA    | NA    | QT      | 0.000 | 0.000 | F    |
| PGS003071 | Systolic Blood Pressure    | 0.509  | 0.451  | 1.127  | NA    | NA    | NA    | QT      | 0.000 | 0.000 | F    |
| PGS003072 | Systolic Blood Pressure    | 0.419  | 0.361  | 1.162  | NA    | NA    | NA    | QT      | 0.000 | 0.000 | F    |
| PGS003073 | Systolic Blood Pressure    | 0.392  | 0.332  | 1.180  | NA    | NA    | NA    | QT      | 0.000 | 0.000 | F    |
| PGS003074 | Systolic Blood Pressure    | 0.409  | 0.357  | 1.147  | NA    | NA    | NA    | QT      | 0.000 | 0.000 | F    |
| PGS003075 | Systolic Blood Pressure    | 0.400  | 0.352  | 1.135  | NA    | NA    | NA    | QT      | 0.000 | 0.000 | F    |
| PGS003076 | Systolic Blood Pressure    | 0.464  | 0.416  | 1.115  | NA    | NA    | NA    | QT      | 0.000 | 0.000 | F    |
| PGS003077 | Systolic Blood Pressure    | 0.416  | 0.365  | 1.140  | NA    | NA    | NA    | QT      | 0.000 | 0.000 | F    |
| PGS003078 | Systolic Blood Pressure    | 0.391  | 0.336  | 1.161  | NA    | NA    | NA    | QT      | 0.000 | 0.000 | F    |
| PGS003079 | Systolic Blood Pressure    | 0.104  | 0.087  | 1.192  | NA    | NA    | NA    | QT      | 0.000 | 0.000 | F    |
| PGS003080 | Systolic Blood Pressure    | 0.081  | 0.066  | 1.233  | NA    | NA    | NA    | QT      | 0.000 | 0.000 | F    |
| PGS003081 | Systolic Blood Pressure    | 0.079  | 0.062  | 1.271  | NA    | NA    | NA    | QT      | 0.000 | 0.000 | F    |
| PGS003082 | Systolic Blood Pressure    | 0.052  | 0.046  | 1.148  | NA    | NA    | NA    | QT      | 0.014 | 0.024 | F    |
| PGS003083 | Systolic Blood Pressure    | 0.121  | 0.104  | 1.164  | NA    | NA    | NA    | QT      | 0.000 | 0.000 | F    |
| PGS003084 | Systolic Blood Pressure    | 0.104  | 0.089  | 1.170  | NA    | NA    | NA    | QT      | 0.000 | 0.000 | F    |
| PGS003085 | Systolic Blood Pressure    | 0.081  | 0.067  | 1.208  | NA    | NA    | NA    | QT      | 0.000 | 0.000 | F    |
| PGS003086 | Systolic Blood Pressure    | 0.079  | 0.063  | 1.255  | NA    | NA    | NA    | QT      | 0.000 | 0.000 | F    |
| PGS003087 | Systolic Blood Pressure    | 0.050  | 0.040  | 1.242  | NA    | NA    | NA    | QT      | 0.000 | 0.001 | F    |
| PGS003088 | Systolic Blood Pressure    | 0.118  | 0.102  | 1.152  | NA    | NA    | NA    | QT      | 0.000 | 0.000 | F    |
| PGS003089 | Type 2 Diabetes Mellitus   | 0.883  | 0.940  | 0.940  | 2.418 | 2.560 | 0.945 | Disease | 0.000 | 0.000 | M    |
| PGS003090 | Type 2 Diabetes Mellitus   | 0.542  | 0.570  | 0.951  | 1.719 | 1.768 | 0.972 | Disease | 0.009 | 0.015 | M    |
| PGS003091 | Type 2 Diabetes Mellitus   | 0.603  | 0.635  | 0.951  | 1.828 | 1.886 | 0.969 | Disease | 0.004 | 0.006 | M    |
| PGS003092 | Type 2 Diabetes Mellitus   | 0.621  | 0.682  | 0.912  | 1.861 | 1.977 | 0.941 | Disease | 0.000 | 0.000 | M    |
| PGS003093 | Type 2 Diabetes Mellitus   | 0.824  | 0.875  | 0.942  | 2.281 | 2.399 | 0.951 | Disease | 0.000 | 0.000 | M    |
| PGS003094 | Type 2 Diabetes Mellitus   | 0.356  | 0.357  | 0.999  | 1.428 | 1.429 | 1.000 | Disease | 0.984 | 0.988 | None |
| PGS003095 | Type 2 Diabetes Mellitus   | 0.265  | 0.271  | 0.978  | 1.303 | 1.311 | 0.994 | Disease | 0.565 | 0.656 | None |
| PGS003096 | Type 2 Diabetes Mellitus   | 0.264  | 0.270  | 0.980  | 1.303 | 1.310 | 0.995 | Disease | 0.601 | 0.689 | None |
| PGS003097 | Type 2 Diabetes Mellitus   | 0.009  | 0.008  | 1.195  | 1.009 | 1.008 | 1.001 | Disease | 0.887 | 0.923 | None |
| PGS003098 | Type 2 Diabetes Mellitus   | 0.371  | 0.355  | 1.044  | 1.449 | 1.427 | 1.016 | Disease | 0.140 | 0.205 | None |
| PGS003099 | Type 2 Diabetes Mellitus   | 0.917  | 0.922  | 0.994  | 2.501 | 2.514 | 0.995 | Disease | 0.645 | 0.726 | None |
| PGS003100 | Type 2 Diabetes Mellitus   | 0.842  | 0.845  | 0.997  | 2.322 | 2.328 | 0.997 | Disease | 0.806 | 0.855 | None |
| PGS003101 | Type 2 Diabetes Mellitus   | 0.842  | 0.845  | 0.997  | 2.322 | 2.328 | 0.997 | Disease | 0.806 | 0.855 | None |
| PGS003102 | Type 2 Diabetes Mellitus   | 0.918  | 0.933  | 0.985  | 2.505 | 2.541 | 0.986 | Disease | 0.213 | 0.294 | None |
| PGS003103 | Type 2 Diabetes Mellitus   | 0.960  | 0.981  | 0.979  | 2.612 | 2.667 | 0.979 | Disease | 0.075 | 0.117 | None |
| PGS003104 | Type 2 Diabetes Mellitus   | 0.452  | 0.438  | 1.031  | 1.572 | 1.550 | 1.014 | Disease | 0.196 | 0.274 | None |
| PGS003105 | Type 2 Diabetes Mellitus   | 0.323  | 0.317  | 1.017  | 1.381 | 1.373 | 1.005 | Disease | 0.607 | 0.693 | None |
| PGS003106 | Type 2 Diabetes Mellitus   | 0.323  | 0.317  | 1.017  | 1.381 | 1.373 | 1.005 | Disease | 0.607 | 0.693 | None |
| PGS003107 | Type 2 Diabetes Mellitus   | 0.008  | 0.001  | 6.725  | 1.008 | 1.001 | 1.007 | Disease | 0.491 | 0.588 | None |
| PGS003108 | Type 2 Diabetes Mellitus   | 0.478  | 0.466  | 1.025  | 1.613 | 1.594 | 1.012 | Disease | 0.271 | 0.363 | None |
| PGS003109 | Type 2 Diabetes Mellitus   | 0.356  | 0.355  | 1.002  | 1.428 | 1.427 | 1.001 | Disease | 0.954 | 0.969 | None |
| PGS003110 | Type 2 Diabetes Mellitus   | 0.281  | 0.276  | 1.016  | 1.324 | 1.318 | 1.004 | Disease | 0.667 | 0.746 | None |

|           |                               |        |        |        |       |       |       |         |       |       |      |
|-----------|-------------------------------|--------|--------|--------|-------|-------|-------|---------|-------|-------|------|
| PGS003111 | Type 2 Diabetes Mellitus      | 0.268  | 0.265  | 1.011  | 1.307 | 1.303 | 1.003 | Disease | 0.782 | 0.835 | None |
| PGS003112 | Type 2 Diabetes Mellitus      | 0.005  | 0.008  | 0.585  | 1.005 | 1.008 | 0.997 | Disease | 0.752 | 0.812 | None |
| PGS003113 | Type 2 Diabetes Mellitus      | 0.376  | 0.354  | 1.061  | 1.456 | 1.425 | 1.022 | Disease | 0.040 | 0.065 | F    |
| PGS003114 | Type 2 Diabetes Mellitus      | 1.121  | 1.157  | 0.968  | 3.067 | 3.181 | 0.964 | Disease | 0.002 | 0.004 | M    |
| PGS003115 | Type 2 Diabetes Mellitus      | 1.078  | 1.103  | 0.977  | 2.938 | 3.012 | 0.975 | Disease | 0.033 | 0.055 | M    |
| PGS003116 | Type 2 Diabetes Mellitus      | 1.078  | 1.103  | 0.977  | 2.938 | 3.012 | 0.975 | Disease | 0.033 | 0.055 | M    |
| PGS003117 | Type 2 Diabetes Mellitus      | 0.918  | 0.933  | 0.985  | 2.505 | 2.541 | 0.986 | Disease | 0.213 | 0.295 | None |
| PGS003118 | Type 2 Diabetes Mellitus      | 0.962  | 0.983  | 0.978  | 2.616 | 2.673 | 0.979 | Disease | 0.068 | 0.106 | None |
| PGS003119 | Type 2 Diabetes Mellitus      | 0.452  | 0.439  | 1.031  | 1.572 | 1.551 | 1.013 | Disease | 0.209 | 0.290 | None |
| PGS003120 | Type 2 Diabetes Mellitus      | 0.320  | 0.317  | 1.010  | 1.377 | 1.373 | 1.003 | Disease | 0.764 | 0.820 | None |
| PGS003121 | Type 2 Diabetes Mellitus      | 0.320  | 0.317  | 1.010  | 1.377 | 1.373 | 1.003 | Disease | 0.764 | 0.820 | None |
| PGS003122 | Type 2 Diabetes Mellitus      | 0.008  | 0.000  | 20.409 | 1.008 | 1.000 | 1.008 | Disease | 0.452 | 0.552 | None |
| PGS003123 | Type 2 Diabetes Mellitus      | 0.482  | 0.469  | 1.028  | 1.619 | 1.598 | 1.013 | Disease | 0.219 | 0.302 | None |
| PGS003124 | Body Mass Index               | -0.054 | -0.045 | 1.202  | NA    | NA    | NA    | QT      | 0.001 | 0.002 | F    |
| PGS003125 | Body Mass Index               | -0.018 | -0.011 | 1.560  | NA    | NA    | NA    | QT      | 0.023 | 0.038 | F    |
| PGS003126 | Body Mass Index               | -0.016 | -0.011 | 1.413  | NA    | NA    | NA    | QT      | 0.102 | 0.154 | None |
| PGS003127 | Body Mass Index               | 0.002  | -0.002 | -0.780 | NA    | NA    | NA    | QT      | 0.176 | 0.250 | None |
| PGS003128 | Body Mass Index               | -0.064 | -0.056 | 1.133  | NA    | NA    | NA    | QT      | 0.008 | 0.014 | F    |
| PGS003129 | Body Mass Index               | -0.049 | -0.045 | 1.090  | NA    | NA    | NA    | QT      | 0.148 | 0.216 | None |
| PGS003130 | Body Mass Index               | -0.027 | -0.025 | 1.093  | NA    | NA    | NA    | QT      | 0.410 | 0.513 | None |
| PGS003131 | Body Mass Index               | -0.024 | -0.022 | 1.092  | NA    | NA    | NA    | QT      | 0.471 | 0.570 | None |
| PGS003132 | Body Mass Index               | -0.002 | -0.001 | 2.801  | NA    | NA    | NA    | QT      | 0.620 | 0.705 | None |
| PGS003133 | Body Mass Index               | -0.062 | -0.055 | 1.119  | NA    | NA    | NA    | QT      | 0.019 | 0.032 | F    |
| PGS003134 | Total Cholesterol Measurement | 0.332  | 0.310  | 1.073  | NA    | NA    | NA    | QT      | 0.000 | 0.000 | F    |
| PGS003135 | Total Cholesterol Measurement | 0.291  | 0.263  | 1.109  | NA    | NA    | NA    | QT      | 0.000 | 0.000 | F    |
| PGS003136 | Total Cholesterol Measurement | 0.309  | 0.279  | 1.104  | NA    | NA    | NA    | QT      | 0.000 | 0.000 | F    |
| PGS003137 | Total Cholesterol Measurement | 0.378  | 0.354  | 1.066  | NA    | NA    | NA    | QT      | 0.000 | 0.000 | F    |
| PGS003138 | Total Cholesterol Measurement | 0.354  | 0.328  | 1.079  | NA    | NA    | NA    | QT      | 0.000 | 0.000 | F    |
| PGS003139 | Total Cholesterol Measurement | 0.330  | 0.303  | 1.090  | NA    | NA    | NA    | QT      | 0.000 | 0.000 | F    |
| PGS003140 | Total Cholesterol Measurement | 0.293  | 0.263  | 1.118  | NA    | NA    | NA    | QT      | 0.000 | 0.000 | F    |
| PGS003141 | Total Cholesterol Measurement | 0.309  | 0.277  | 1.113  | NA    | NA    | NA    | QT      | 0.000 | 0.000 | F    |
| PGS003142 | Total Cholesterol Measurement | 0.380  | 0.351  | 1.083  | NA    | NA    | NA    | QT      | 0.000 | 0.000 | F    |
| PGS003143 | Total Cholesterol Measurement | 0.354  | 0.325  | 1.090  | NA    | NA    | NA    | QT      | 0.000 | 0.000 | F    |
| PGS003144 | Triglyceride Measurement      | 0.343  | 0.470  | 0.730  | NA    | NA    | NA    | QT      | 0.000 | 0.000 | M    |
| PGS003145 | Triglyceride Measurement      | 0.310  | 0.429  | 0.724  | NA    | NA    | NA    | QT      | 0.000 | 0.000 | M    |
| PGS003146 | Triglyceride Measurement      | 0.340  | 0.473  | 0.719  | NA    | NA    | NA    | QT      | 0.000 | 0.000 | M    |
| PGS003147 | Triglyceride Measurement      | 0.391  | 0.547  | 0.716  | NA    | NA    | NA    | QT      | 0.000 | 0.000 | M    |
| PGS003148 | Triglyceride Measurement      | 0.326  | 0.449  | 0.726  | NA    | NA    | NA    | QT      | 0.000 | 0.000 | M    |
| PGS003149 | Triglyceride Measurement      | 0.345  | 0.510  | 0.675  | NA    | NA    | NA    | QT      | 0.000 | 0.000 | M    |
| PGS003150 | Triglyceride Measurement      | 0.275  | 0.402  | 0.684  | NA    | NA    | NA    | QT      | 0.000 | 0.000 | M    |
| PGS003151 | Triglyceride Measurement      | 0.296  | 0.441  | 0.672  | NA    | NA    | NA    | QT      | 0.000 | 0.000 | M    |
| PGS003152 | Triglyceride Measurement      | 0.385  | 0.581  | 0.663  | NA    | NA    | NA    | QT      | 0.000 | 0.000 | M    |
| PGS003153 | Triglyceride Measurement      | 0.322  | 0.473  | 0.681  | NA    | NA    | NA    | QT      | 0.000 | 0.000 | M    |
| PGS003154 | Vitamin B12 Measurement       | 0.341  | 0.368  | 0.926  | NA    | NA    | NA    | QT      | 0.000 | 0.000 | M    |
| PGS003155 | Vitamin B12 Measurement       | 0.604  | 0.662  | 0.912  | NA    | NA    | NA    | QT      | 0.000 | 0.000 | M    |
| PGS003156 | Vitamin B12 Measurement       | 0.656  | 0.723  | 0.907  | NA    | NA    | NA    | QT      | 0.000 | 0.000 | M    |
| PGS003157 | Vitamin B12 Measurement       | 0.103  | 0.116  | 0.888  | NA    | NA    | NA    | QT      | 0.088 | 0.136 | None |
| PGS003158 | Vitamin B12 Measurement       | 0.500  | 0.548  | 0.913  | NA    | NA    | NA    | QT      | 0.000 | 0.000 | M    |
| PGS003159 | Vitamin B12 Measurement       | 0.652  | 0.747  | 0.872  | NA    | NA    | NA    | QT      | 0.000 | 0.000 | M    |
| PGS003160 | Vitamin B12 Measurement       | 0.693  | 0.790  | 0.876  | NA    | NA    | NA    | QT      | 0.000 | 0.000 | M    |
| PGS003161 | Vitamin B12 Measurement       | 0.745  | 0.841  | 0.886  | NA    | NA    | NA    | QT      | 0.000 | 0.000 | M    |
| PGS003162 | Vitamin B12 Measurement       | 0.105  | 0.130  | 0.806  | NA    | NA    | NA    | QT      | 0.001 | 0.002 | M    |
| PGS003163 | Vitamin B12 Measurement       | 0.546  | 0.637  | 0.857  | NA    | NA    | NA    | QT      | 0.000 | 0.000 | M    |
| PGS003164 | Vitamin B12 Measurement       | -0.001 | 0.000  | -4.907 | NA    | NA    | NA    | QT      | 0.936 | 0.958 | None |
| PGS003165 | Vitamin B12 Measurement       | -0.011 | 0.007  | -1.433 | NA    | NA    | NA    | QT      | 0.018 | 0.030 | F    |
| PGS003166 | Vitamin B12 Measurement       | -0.011 | 0.007  | -1.433 | NA    | NA    | NA    | QT      | 0.018 | 0.030 | F    |

|           |                            |        |        |        |       |       |       |         |       |       |      |
|-----------|----------------------------|--------|--------|--------|-------|-------|-------|---------|-------|-------|------|
| PGS003167 | Vitamin B12 Measurement    | 0.009  | -0.003 | -2.748 | NA    | NA    | NA    | QT      | 0.108 | 0.162 | None |
| PGS003168 | Vitamin B12 Measurement    | 0.002  | 0.004  | 0.401  | NA    | NA    | NA    | QT      | 0.729 | 0.795 | None |
| PGS003169 | Vitamin B12 Measurement    | 0.003  | 0.003  | 0.886  | NA    | NA    | NA    | QT      | 0.960 | 0.973 | None |
| PGS003170 | Vitamin B12 Measurement    | -0.003 | -0.014 | 0.233  | NA    | NA    | NA    | QT      | 0.169 | 0.241 | None |
| PGS003171 | Vitamin B12 Measurement    | -0.003 | -0.014 | 0.233  | NA    | NA    | NA    | QT      | 0.169 | 0.241 | None |
| PGS003172 | Vitamin B12 Measurement    | 0.008  | -0.003 | -3.128 | NA    | NA    | NA    | QT      | 0.165 | 0.237 | None |
| PGS003173 | Vitamin B12 Measurement    | 0.001  | 0.006  | 0.202  | NA    | NA    | NA    | QT      | 0.515 | 0.610 | None |
| PGS003174 | Vitamin D Measurement      | -0.001 | 0.001  | -1.620 | NA    | NA    | NA    | QT      | 0.633 | 0.716 | None |
| PGS003175 | Vitamin D Measurement      | 0.003  | -0.001 | -3.350 | NA    | NA    | NA    | QT      | 0.161 | 0.232 | None |
| PGS003176 | Vitamin D Measurement      | 0.003  | -0.001 | -3.514 | NA    | NA    | NA    | QT      | 0.224 | 0.309 | None |
| PGS003177 | Vitamin D Measurement      | 0.001  | 0.001  | 1.095  | NA    | NA    | NA    | QT      | 0.974 | 0.982 | None |
| PGS003178 | Vitamin D Measurement      | 0.002  | 0.003  | 0.687  | NA    | NA    | NA    | QT      | 0.745 | 0.807 | None |
| PGS003179 | Vitamin D Measurement      | -0.001 | 0.002  | -0.418 | NA    | NA    | NA    | QT      | 0.235 | 0.321 | None |
| PGS003180 | Vitamin D Measurement      | 0.000  | 0.000  | -6.658 | NA    | NA    | NA    | QT      | 0.939 | 0.961 | None |
| PGS003181 | Vitamin D Measurement      | 0.002  | 0.002  | 1.071  | NA    | NA    | NA    | QT      | 0.961 | 0.974 | None |
| PGS003182 | Vitamin D Measurement      | 0.003  | 0.002  | 1.112  | NA    | NA    | NA    | QT      | 0.930 | 0.955 | None |
| PGS003183 | Vitamin D Measurement      | 0.001  | 0.003  | 0.462  | NA    | NA    | NA    | QT      | 0.580 | 0.668 | None |
| PGS003184 | Vitamin D Measurement      | 0.152  | 0.157  | 0.964  | NA    | NA    | NA    | QT      | 0.052 | 0.083 | None |
| PGS003185 | Vitamin D Measurement      | 0.143  | 0.147  | 0.970  | NA    | NA    | NA    | QT      | 0.136 | 0.199 | None |
| PGS003186 | Vitamin D Measurement      | 0.143  | 0.146  | 0.974  | NA    | NA    | NA    | QT      | 0.195 | 0.273 | None |
| PGS003187 | Vitamin D Measurement      | -0.001 | 0.004  | -0.192 | NA    | NA    | NA    | QT      | 0.110 | 0.165 | None |
| PGS003188 | Vitamin D Measurement      | 0.148  | 0.150  | 0.982  | NA    | NA    | NA    | QT      | 0.339 | 0.436 | None |
| PGS003189 | Vitamin D Measurement      | 0.233  | 0.204  | 0.978  | NA    | NA    | NA    | QT      | 0.067 | 0.105 | None |
| PGS003190 | Vitamin D Measurement      | 0.194  | 0.208  | 0.952  | NA    | NA    | NA    | QT      | 0.001 | 0.001 | M    |
| PGS003191 | Vitamin D Measurement      | 0.198  | 0.207  | 0.957  | NA    | NA    | NA    | QT      | 0.002 | 0.003 | M    |
| PGS003192 | Vitamin D Measurement      | 0.282  | 0.281  | 1.002  | NA    | NA    | NA    | QT      | 0.837 | 0.878 | None |
| PGS003193 | Vitamin D Measurement      | 0.349  | 0.356  | 0.979  | NA    | NA    | NA    | QT      | 0.005 | 0.010 | M    |
| PGS003194 | Vitamin D Measurement      | 0.324  | 0.330  | 0.982  | NA    | NA    | NA    | QT      | 0.034 | 0.056 | M    |
| PGS003195 | Vitamin D Measurement      | 0.188  | 0.197  | 0.955  | NA    | NA    | NA    | QT      | 0.002 | 0.004 | M    |
| PGS003196 | Vitamin D Measurement      | 0.192  | 0.200  | 0.960  | NA    | NA    | NA    | QT      | 0.006 | 0.011 | M    |
| PGS003197 | Vitamin D Measurement      | 0.321  | 0.321  | 1.001  | NA    | NA    | NA    | QT      | 0.948 | 0.966 | None |
| PGS003198 | Vitamin D Measurement      | 0.346  | 0.355  | 0.976  | NA    | NA    | NA    | QT      | 0.002 | 0.003 | M    |
| PGS003199 | Vitamin D Measurement      | 0.152  | 0.157  | 0.964  | NA    | NA    | NA    | QT      | 0.054 | 0.085 | None |
| PGS003200 | Vitamin D Measurement      | 0.146  | 0.151  | 0.970  | NA    | NA    | NA    | QT      | 0.125 | 0.185 | None |
| PGS003201 | Vitamin D Measurement      | 0.146  | 0.150  | 0.974  | NA    | NA    | NA    | QT      | 0.177 | 0.252 | None |
| PGS003202 | Vitamin D Measurement      | -0.012 | -0.028 | 0.412  | NA    | NA    | NA    | QT      | 0.000 | 0.000 | M    |
| PGS003203 | Vitamin D Measurement      | 0.146  | 0.148  | 0.981  | NA    | NA    | NA    | QT      | 0.322 | 0.417 | None |
| PGS003204 | Sleep Apnea                | 0.020  | -0.019 | -1.031 | 1.020 | 0.981 | 1.040 | Disease | 0.059 | 0.093 | None |
| PGS003205 | Sleep Apnea                | -0.012 | -0.010 | 1.233  | 0.988 | 0.991 | 0.998 | Disease | 0.914 | 0.943 | None |
| PGS003206 | Sleep Apnea                | 0.005  | -0.003 | -1.652 | 1.005 | 0.997 | 1.008 | Disease | 0.684 | 0.757 | None |
| PGS003207 | Sleep Apnea                | -0.019 | -0.014 | 1.437  | 0.981 | 0.987 | 0.994 | Disease | 0.767 | 0.822 | None |
| PGS003208 | Sleep Apnea                | 0.021  | -0.005 | -4.338 | 1.022 | 0.995 | 1.027 | Disease | 0.205 | 0.285 | None |
| PGS003209 | Sleep Apnea                | 0.525  | 0.592  | 0.887  | 1.691 | 1.807 | 0.936 | Disease | 0.001 | 0.002 | M    |
| PGS003210 | Sleep Apnea                | 0.676  | 0.714  | 0.947  | 1.967 | 2.043 | 0.963 | Disease | 0.005 | 0.008 | M    |
| PGS003211 | Sleep Apnea                | 0.676  | 0.714  | 0.947  | 1.967 | 2.043 | 0.963 | Disease | 0.005 | 0.008 | M    |
| PGS003212 | Sleep Apnea                | 0.280  | 0.323  | 0.866  | 1.323 | 1.381 | 0.958 | Disease | 0.027 | 0.044 | M    |
| PGS003213 | Sleep Apnea                | 0.769  | 0.781  | 0.984  | 2.157 | 2.185 | 0.987 | Disease | 0.428 | 0.530 | None |
| PGS003214 | Sleep Apnea                | 0.000  | -0.031 | 0.010  | 1.000 | 0.970 | 1.031 | Disease | 0.144 | 0.210 | None |
| PGS003215 | Sleep Apnea                | -0.021 | -0.021 | 0.970  | 0.980 | 0.979 | 1.001 | Disease | 0.975 | 0.982 | None |
| PGS003216 | Sleep Apnea                | 0.001  | -0.020 | -0.059 | 1.001 | 0.981 | 1.021 | Disease | 0.314 | 0.409 | None |
| PGS003217 | Sleep Apnea                | 0.020  | -0.007 | -2.742 | 1.020 | 0.993 | 1.027 | Disease | 0.191 | 0.268 | None |
| PGS003218 | Sleep Apnea                | 0.020  | -0.003 | -6.511 | 1.020 | 0.997 | 1.024 | Disease | 0.261 | 0.352 | None |
| PGS003219 | Glomerular Filtration Rate | -0.178 | -0.205 | 0.868  | NA    | NA    | NA    | QT      | 0.000 | 0.000 | M    |
| PGS003220 | Glomerular Filtration Rate | -0.152 | -0.177 | 0.859  | NA    | NA    | NA    | QT      | 0.000 | 0.000 | M    |
| PGS003221 | Glomerular Filtration Rate | -0.152 | -0.176 | 0.859  | NA    | NA    | NA    | QT      | 0.000 | 0.000 | M    |
| PGS003222 | Glomerular Filtration Rate | -0.159 | -0.183 | 0.870  | NA    | NA    | NA    | QT      | 0.000 | 0.000 | M    |

|           |                                                  |        |        |       |       |       |       |         |       |       |      |
|-----------|--------------------------------------------------|--------|--------|-------|-------|-------|-------|---------|-------|-------|------|
| PGS003223 | Glomerular Filtration Rate                       | -0.179 | -0.206 | 0.867 | NA    | NA    | NA    | QT      | 0.000 | 0.000 | M    |
| PGS003224 | Glomerular Filtration Rate                       | -0.177 | -0.205 | 0.866 | NA    | NA    | NA    | QT      | 0.000 | 0.000 | M    |
| PGS003225 | Glomerular Filtration Rate                       | -0.152 | -0.177 | 0.858 | NA    | NA    | NA    | QT      | 0.000 | 0.000 | M    |
| PGS003226 | Glomerular Filtration Rate                       | -0.151 | -0.176 | 0.858 | NA    | NA    | NA    | QT      | 0.000 | 0.000 | M    |
| PGS003227 | Glomerular Filtration Rate                       | -0.160 | -0.185 | 0.867 | NA    | NA    | NA    | QT      | 0.000 | 0.000 | M    |
| PGS003228 | Glomerular Filtration Rate                       | -0.178 | -0.206 | 0.867 | NA    | NA    | NA    | QT      | 0.000 | 0.000 | M    |
| PGS003279 | Cystatin C Measurement                           | 0.198  | 0.200  | 0.991 | NA    | NA    | NA    | QT      | 0.503 | 0.600 | None |
| PGS003280 | Cystatin C Measurement                           | 0.202  | 0.201  | 1.008 | NA    | NA    | NA    | QT      | 0.561 | 0.651 | None |
| PGS003281 | Cystatin C Measurement                           | 0.205  | 0.203  | 1.007 | NA    | NA    | NA    | QT      | 0.606 | 0.693 | None |
| PGS003282 | Cystatin C Measurement                           | 0.395  | 0.400  | 0.988 | NA    | NA    | NA    | QT      | 0.049 | 0.078 | M    |
| PGS003283 | Cystatin C Measurement                           | 0.317  | 0.316  | 1.003 | NA    | NA    | NA    | QT      | 0.749 | 0.810 | None |
| PGS003284 | Cystatin C Measurement                           | 0.222  | 0.234  | 0.946 | NA    | NA    | NA    | QT      | 0.000 | 0.000 | M    |
| PGS003285 | Cystatin C Measurement                           | 0.224  | 0.225  | 0.997 | NA    | NA    | NA    | QT      | 0.812 | 0.860 | None |
| PGS003286 | Cystatin C Measurement                           | 0.229  | 0.231  | 0.994 | NA    | NA    | NA    | QT      | 0.633 | 0.716 | None |
| PGS003287 | Cystatin C Measurement                           | 0.391  | 0.423  | 0.925 | NA    | NA    | NA    | QT      | 0.000 | 0.000 | M    |
| PGS003288 | Cystatin C Measurement                           | 0.319  | 0.338  | 0.943 | NA    | NA    | NA    | QT      | 0.000 | 0.000 | M    |
| PGS003319 | Insomnia                                         | -0.036 | -0.009 | 4.111 | 0.964 | 0.991 | 0.973 | Disease | 0.153 | 0.222 | None |
| PGS003320 | Insomnia                                         | -0.036 | -0.025 | 1.458 | 0.965 | 0.976 | 0.989 | Disease | 0.557 | 0.648 | None |
| PGS003321 | Insomnia                                         | -0.039 | -0.025 | 1.557 | 0.962 | 0.975 | 0.986 | Disease | 0.468 | 0.568 | None |
| PGS003322 | Insomnia                                         | -0.062 | -0.043 | 1.446 | 0.940 | 0.958 | 0.981 | Disease | 0.320 | 0.415 | None |
| PGS003323 | Insomnia                                         | -0.106 | -0.069 | 1.532 | 0.900 | 0.933 | 0.964 | Disease | 0.057 | 0.091 | None |
| PGS003324 | Insomnia                                         | 0.091  | 0.080  | 1.143 | 1.096 | 1.083 | 1.011 | Disease | 0.554 | 0.646 | None |
| PGS003325 | Insomnia                                         | 0.218  | 0.161  | 1.350 | 1.243 | 1.175 | 1.058 | Disease | 0.004 | 0.006 | F    |
| PGS003326 | Insomnia                                         | 0.217  | 0.162  | 1.346 | 1.243 | 1.175 | 1.058 | Disease | 0.004 | 0.007 | F    |
| PGS003327 | Insomnia                                         | 0.122  | 0.086  | 1.418 | 1.130 | 1.090 | 1.037 | Disease | 0.061 | 0.097 | None |
| PGS003328 | Insomnia                                         | 0.204  | 0.159  | 1.285 | 1.226 | 1.172 | 1.046 | Disease | 0.019 | 0.033 | F    |
| PGS003329 | Gout                                             | 0.415  | 0.502  | 0.826 | 1.514 | 1.652 | 0.917 | Disease | 0.001 | 0.001 | M    |
| PGS003332 | Venous Thromboembolism                           | 0.384  | 0.491  | 0.781 | 1.467 | 1.634 | 0.898 | Disease | 0.000 | 0.000 | M    |
| PGS003334 | Dementia                                         | 0.207  | 0.148  | 1.395 | 1.230 | 1.160 | 1.060 | Disease | 0.009 | 0.015 | F    |
| PGS003335 | Urinary Bladder Carcinoma                        | 0.269  | 0.241  | 1.119 | 1.309 | 1.272 | 1.029 | Disease | 0.364 | 0.464 | None |
| PGS003337 | HbA1c Measurement                                | 0.094  | 0.111  | 0.841 | NA    | NA    | NA    | QT      | 0.000 | 0.000 | M    |
| PGS003338 | High-Density Lipoprotein Cholesterol Measurement | 0.237  | 0.191  | 1.244 | NA    | NA    | NA    | QT      | 0.000 | 0.000 | F    |
| PGS003339 | Low-Density Lipoprotein Cholesterol Measurement  | 0.212  | 0.179  | 1.186 | NA    | NA    | NA    | QT      | 0.000 | 0.000 | F    |
| PGS003340 | Triglyceride Measurement                         | 0.140  | 0.208  | 0.673 | NA    | NA    | NA    | QT      | 0.000 | 0.000 | M    |
| PGS003341 | Total Cholesterol Measurement                    | 0.176  | 0.157  | 1.122 | NA    | NA    | NA    | QT      | 0.000 | 0.000 | F    |
| PGS003342 | Serum Alanine Aminotransferase Measurement       | 0.065  | 0.112  | 0.575 | NA    | NA    | NA    | QT      | 0.000 | 0.000 | M    |
| PGS003343 | Aspartate Aminotransferase Measurement           | 0.055  | 0.077  | 0.709 | NA    | NA    | NA    | QT      | 0.000 | 0.000 | M    |
| PGS003344 | Serum Gamma-Glutamyl Transferase Measurement     | 0.124  | 0.166  | 0.751 | NA    | NA    | NA    | QT      | 0.000 | 0.000 | M    |
| PGS003346 | HbA1c Measurement                                | 0.094  | 0.111  | 0.842 | NA    | NA    | NA    | QT      | 0.000 | 0.000 | M    |
| PGS003347 | High-Density Lipoprotein Cholesterol Measurement | 0.240  | 0.193  | 1.240 | NA    | NA    | NA    | QT      | 0.000 | 0.000 | F    |
| PGS003348 | Low-Density Lipoprotein Cholesterol Measurement  | 0.212  | 0.179  | 1.186 | NA    | NA    | NA    | QT      | 0.000 | 0.000 | F    |
| PGS003349 | Triglyceride Measurement                         | 0.134  | 0.194  | 0.691 | NA    | NA    | NA    | QT      | 0.000 | 0.000 | M    |
| PGS003350 | Total Cholesterol Measurement                    | 0.176  | 0.157  | 1.122 | NA    | NA    | NA    | QT      | 0.000 | 0.000 | F    |
| PGS003351 | Serum Alanine Aminotransferase Measurement       | 0.061  | 0.107  | 0.569 | NA    | NA    | NA    | QT      | 0.000 | 0.000 | M    |
| PGS003352 | Aspartate Aminotransferase Measurement           | 0.055  | 0.077  | 0.709 | NA    | NA    | NA    | QT      | 0.000 | 0.000 | M    |
| PGS003353 | Type 2 Diabetes Mellitus                         | 0.385  | 0.392  | 0.981 | 1.469 | 1.480 | 0.992 | Disease | 0.472 | 0.571 | None |
| PGS003355 | Coronary Artery Disease                          | 0.328  | 0.443  | 0.739 | 1.388 | 1.558 | 0.891 | Disease | 0.000 | 0.000 | M    |
| PGS003356 | Coronary Artery Disease                          | 0.696  | 0.891  | 0.781 | 2.006 | 2.437 | 0.823 | Disease | 0.000 | 0.000 | M    |
| PGS003373 | Alcohol Consumption Measurement                  | -0.022 | -0.030 | 0.741 | NA    | NA    | NA    | QT      | 0.311 | 0.405 | None |
| PGS003374 | Alcohol Consumption Measurement                  | 0.001  | 0.008  | 0.179 | NA    | NA    | NA    | QT      | 0.382 | 0.483 | None |
| PGS003375 | Alcohol Consumption Measurement                  | -0.007 | -0.029 | 0.233 | NA    | NA    | NA    | QT      | 0.004 | 0.007 | M    |
| PGS003376 | Alcohol Consumption Measurement                  | -0.195 | -0.313 | 0.625 | NA    | NA    | NA    | QT      | 0.000 | 0.000 | M    |
| PGS003377 | Glomerular Filtration Rate                       | 0.280  | 0.348  | 0.805 | NA    | NA    | NA    | QT      | 0.000 | 0.000 | M    |
| PGS003382 | Melanoma                                         | 0.423  | 0.431  | 0.982 | 1.526 | 1.538 | 0.992 | Disease | 0.750 | 0.811 | None |
| PGS003386 | Colorectal Cancer                                | 0.292  | 0.299  | 0.979 | 1.340 | 1.348 | 0.994 | Disease | 0.775 | 0.830 | None |
| PGS003387 | Esophageal Cancer                                | 0.119  | 0.357  | 0.334 | 1.127 | 1.429 | 0.788 | Disease | 0.000 | 0.000 | M    |

|           |                                                |        |        |        |       |       |       |         |       |       |      |
|-----------|------------------------------------------------|--------|--------|--------|-------|-------|-------|---------|-------|-------|------|
| PGS003388 | Esophageal Cancer                              | 0.140  | 0.280  | 0.502  | 1.151 | 1.322 | 0.870 | Disease | 0.007 | 0.013 | M    |
| PGS003391 | Lung Carcinoma                                 | 0.089  | 0.114  | 0.782  | 1.093 | 1.121 | 0.975 | Disease | 0.284 | 0.377 | None |
| PGS003392 | Lung Carcinoma                                 | 0.052  | 0.078  | 0.670  | 1.054 | 1.081 | 0.975 | Disease | 0.273 | 0.365 | None |
| PGS003393 | Lung Carcinoma                                 | 0.207  | 0.158  | 1.314  | 1.230 | 1.171 | 1.051 | Disease | 0.045 | 0.073 | F    |
| PGS003395 | Colorectal Cancer                              | 0.304  | 0.336  | 0.904  | 1.356 | 1.400 | 0.968 | Disease | 0.148 | 0.216 | None |
| PGS003400 | Obesity                                        | 0.204  | 0.201  | 1.016  | 1.227 | 1.223 | 1.003 | Disease | 0.765 | 0.822 | None |
| PGS003401 | Triglyceride Measurement                       | 0.205  | 0.288  | 0.711  | NA    | NA    | NA    | QT      | 0.000 | 0.000 | M    |
| PGS003402 | Type 2 Diabetes Mellitus                       | 0.272  | 0.264  | 1.030  | 1.313 | 1.302 | 1.008 | Disease | 0.456 | 0.556 | None |
| PGS003403 | Low-Density Lipoprotein Cholesterol Measuremer | 0.166  | 0.143  | 1.157  | NA    | NA    | NA    | QT      | 0.000 | 0.000 | F    |
| PGS003404 | Low-Density Lipoprotein Cholesterol Measuremer | 0.141  | 0.131  | 1.078  | NA    | NA    | NA    | QT      | 0.000 | 0.001 | F    |
| PGS003405 | Low-Density Lipoprotein Cholesterol Measuremer | 0.261  | 0.215  | 1.212  | NA    | NA    | NA    | QT      | 0.000 | 0.000 | F    |
| PGS003412 | Melanoma                                       | 0.356  | 0.357  | 0.998  | 1.428 | 1.429 | 0.999 | Disease | 0.978 | 0.984 | None |
| PGS003416 | Skin Carcinoma                                 | 0.487  | 0.498  | 0.976  | 1.627 | 1.646 | 0.988 | Disease | 0.301 | 0.395 | None |
| PGS003417 | Skin Carcinoma                                 | 0.474  | 0.483  | 0.982  | 1.606 | 1.621 | 0.991 | Disease | 0.433 | 0.535 | None |
| PGS003420 | Ankylosing Spondylitis                         | 0.140  | 0.337  | 0.416  | 1.151 | 1.401 | 0.821 | Disease | 0.001 | 0.001 | M    |
| PGS003421 | Ankylosing Spondylitis                         | 0.007  | 0.073  | 0.093  | 1.007 | 1.076 | 0.936 | Disease | 0.253 | 0.344 | None |
| PGS003422 | Ankylosing Spondylitis                         | 0.007  | 0.073  | 0.093  | 1.007 | 1.076 | 0.936 | Disease | 0.253 | 0.344 | None |
| PGS003423 | Ankylosing Spondylitis                         | 0.268  | 0.456  | 0.589  | 1.308 | 1.578 | 0.829 | Disease | 0.001 | 0.001 | M    |
| PGS003424 | Ankylosing Spondylitis                         | 0.394  | 0.615  | 0.640  | 1.482 | 1.849 | 0.802 | Disease | 0.001 | 0.001 | M    |
| PGS003429 | Abdominal Aortic Aneurysm                      | 0.894  | 0.941  | 0.950  | 2.444 | 2.563 | 0.954 | Disease | 0.300 | 0.394 | None |
| PGS003430 | Melanoma                                       | 0.395  | 0.407  | 0.972  | 1.485 | 1.502 | 0.989 | Disease | 0.658 | 0.738 | None |
| PGS003431 | Colorectal Cancer                              | 0.332  | 0.353  | 0.940  | 1.393 | 1.423 | 0.979 | Disease | 0.339 | 0.436 | None |
| PGS003432 | Colorectal Cancer                              | 0.414  | 0.462  | 0.895  | 1.512 | 1.588 | 0.952 | Disease | 0.029 | 0.048 | M    |
| PGS003433 | Colorectal Cancer                              | 0.411  | 0.456  | 0.902  | 1.508 | 1.577 | 0.956 | Disease | 0.046 | 0.074 | M    |
| PGS003434 | Colorectal Cancer                              | 0.318  | 0.354  | 0.896  | 1.374 | 1.425 | 0.964 | Disease | 0.097 | 0.148 | None |
| PGS003435 | Colorectal Cancer                              | 0.336  | 0.354  | 0.947  | 1.399 | 1.425 | 0.981 | Disease | 0.401 | 0.504 | None |
| PGS003436 | Colorectal Cancer                              | 0.291  | 0.332  | 0.875  | 1.337 | 1.394 | 0.959 | Disease | 0.062 | 0.098 | None |
| PGS003437 | Thyroid Carcinoma                              | 0.477  | 0.541  | 0.883  | 1.612 | 1.717 | 0.939 | Disease | 0.422 | 0.524 | None |
| PGS003438 | Coronary Artery Disease                        | 0.299  | 0.434  | 0.690  | 1.349 | 1.544 | 0.874 | Disease | 0.000 | 0.000 | M    |
| PGS003439 | Colorectal Cancer                              | 0.383  | 0.402  | 0.953  | 1.467 | 1.495 | 0.981 | Disease | 0.399 | 0.501 | None |
| PGS003440 | Alzheimer's Disease                            | 0.218  | 0.182  | 1.201  | 1.244 | 1.199 | 1.037 | Disease | 0.298 | 0.392 | None |
| PGS003441 | Alzheimer's Disease                            | 0.621  | 0.505  | 1.230  | 1.861 | 1.657 | 1.123 | Disease | 0.000 | 0.000 | F    |
| PGS003443 | Type 2 Diabetes Mellitus                       | 1.042  | 1.077  | 0.968  | 2.835 | 2.935 | 0.966 | Disease | 0.003 | 0.006 | M    |
| PGS003444 | Type 2 Diabetes Mellitus                       | 0.425  | 0.422  | 1.007  | 1.529 | 1.525 | 1.003 | Disease | 0.792 | 0.844 | None |
| PGS003445 | Type 2 Diabetes Mellitus                       | 0.190  | 0.182  | 1.047  | 1.210 | 1.199 | 1.009 | Disease | 0.404 | 0.506 | None |
| PGS003446 | Coronary Artery Disease                        | 0.625  | 0.769  | 0.813  | 1.869 | 2.158 | 0.866 | Disease | 0.000 | 0.000 | M    |
| PGS003448 | Chronic Lymphocytic Leukemia                   | -0.026 | 0.029  | -0.898 | 0.974 | 1.030 | 0.946 | Disease | 0.353 | 0.452 | None |
| PGS003449 | Hodgkin's Lymphoma                             | 0.290  | 0.181  | 1.607  | 1.337 | 1.198 | 1.116 | Disease | 0.227 | 0.312 | None |
| PGS003450 | Multiple Myeloma                               | 0.258  | 0.304  | 0.846  | 1.294 | 1.356 | 0.954 | Disease | 0.321 | 0.416 | None |
| PGS003453 | Chronic Lymphocytic Leukemia                   | 0.636  | 0.643  | 0.990  | 1.890 | 1.902 | 0.993 | Disease | 0.912 | 0.941 | None |
| PGS003454 | Non-Hodgkin's Lymphoma                         | 0.062  | 0.053  | 1.168  | 1.064 | 1.054 | 1.009 | Disease | 0.879 | 0.916 | None |
| PGS003455 | Non-Hodgkin's Lymphoma                         | -0.035 | -0.025 | 1.389  | 0.965 | 0.975 | 0.990 | Disease | 0.870 | 0.909 | None |
| PGS003456 | Venous Thromboembolism                         | 0.346  | 0.426  | 0.812  | 1.413 | 1.530 | 0.923 | Disease | 0.000 | 0.000 | M    |
| PGS003457 | Stroke                                         | -0.024 | -0.028 | 0.862  | 0.976 | 0.973 | 1.004 | Disease | 0.820 | 0.865 | None |
| PGS003459 | Eczema                                         | 0.557  | 0.446  | 1.249  | 1.746 | 1.562 | 1.118 | Disease | 0.331 | 0.428 | None |
| PGS003461 | Atrial Fibrillation                            | 0.452  | 0.499  | 0.906  | 1.571 | 1.646 | 0.954 | Disease | 0.000 | 0.000 | M    |
| PGS003462 | Body Mass Index                                | 0.520  | 0.437  | 1.188  | NA    | NA    | NA    | QT      | 0.000 | 0.000 | F    |
| PGS003463 | Diastolic Blood Pressure                       | 0.350  | 0.318  | 1.100  | NA    | NA    | NA    | QT      | 0.000 | 0.000 | F    |
| PGS003464 | Eosinophil Count                               | 0.333  | 0.379  | 0.879  | NA    | NA    | NA    | QT      | 0.000 | 0.000 | M    |
| PGS003471 | HbA1c Measurement                              | 0.180  | 0.212  | 0.852  | NA    | NA    | NA    | QT      | 0.000 | 0.000 | M    |
| PGS003474 | Low-Density Lipoprotein Cholesterol Measuremer | 0.275  | 0.241  | 1.139  | NA    | NA    | NA    | QT      | 0.000 | 0.000 | F    |
| PGS003475 | Lymphocyte Count                               | 0.221  | 0.206  | 1.074  | NA    | NA    | NA    | QT      | 0.000 | 0.000 | F    |
| PGS003478 | Erythrocyte Count                              | 0.365  | 0.395  | 0.924  | NA    | NA    | NA    | QT      | 0.000 | 0.000 | M    |
| PGS003479 | Sleep Apnea                                    | 0.228  | 0.248  | 0.916  | 1.256 | 1.282 | 0.979 | Disease | 0.314 | 0.409 | None |
| PGS003481 | Total Cholesterol Measurement                  | 0.230  | 0.215  | 1.072  | NA    | NA    | NA    | QT      | 0.000 | 0.000 | F    |
| PGS003482 | Triglyceride Measurement                       | 0.018  | 0.020  | 0.885  | NA    | NA    | NA    | QT      | 0.425 | 0.527 | None |

|           |                                                 |        |        |       |       |       |       |         |       |       |      |
|-----------|-------------------------------------------------|--------|--------|-------|-------|-------|-------|---------|-------|-------|------|
| PGS003483 | Leukocyte Count                                 | 0.329  | 0.323  | 1.018 | NA    | NA    | NA    | QT      | 0.036 | 0.060 | F    |
| PGS003484 | Waist Hip Ratio                                 | 0.370  | 0.302  | 1.223 | NA    | NA    | NA    | QT      | 0.000 | 0.000 | F    |
| PGS003485 | Waist Hip Ratio                                 | 0.315  | 0.210  | 1.503 | NA    | NA    | NA    | QT      | 0.000 | 0.000 | F    |
| PGS003486 | Eczema                                          | 0.504  | 0.420  | 1.200 | 1.655 | 1.521 | 1.088 | Disease | 0.436 | 0.537 | None |
| PGS003491 | Apolipoprotein A1 Measurement                   | 0.409  | 0.332  | 1.232 | NA    | NA    | NA    | QT      | 0.000 | 0.000 | F    |
| PGS003492 | Apolipoprotein B Measurement                    | 0.360  | 0.301  | 1.199 | NA    | NA    | NA    | QT      | 0.000 | 0.000 | F    |
| PGS003494 | Birth Weight                                    | 0.391  | 0.417  | 0.938 | NA    | NA    | NA    | QT      | 0.000 | 0.000 | M    |
| PGS003495 | Total Cholesterol Measurement                   | 0.349  | 0.311  | 1.123 | NA    | NA    | NA    | QT      | 0.000 | 0.000 | F    |
| PGS003498 | Diastolic Blood Pressure                        | 0.438  | 0.406  | 1.079 | NA    | NA    | NA    | QT      | 0.000 | 0.000 | F    |
| PGS003499 | PR Interval                                     | 0.298  | 0.364  | 0.817 | NA    | NA    | NA    | QT      | 0.000 | 0.000 | M    |
| PGS003500 | QT Interval                                     | 0.383  | 0.383  | 0.999 | NA    | NA    | NA    | QT      | 0.950 | 0.967 | None |
| PGS003501 | QT Interval                                     | 0.160  | 0.152  | 1.053 | NA    | NA    | NA    | QT      | 0.390 | 0.491 | None |
| PGS003502 | Erythrocyte Count                               | 0.396  | 0.438  | 0.904 | NA    | NA    | NA    | QT      | 0.000 | 0.000 | M    |
| PGS003503 | Red Cell Distribution Width                     | 0.369  | 0.318  | 1.163 | NA    | NA    | NA    | QT      | 0.000 | 0.000 | F    |
| PGS003507 | Testosterone Measurement                        | 0.033  | 0.011  | 2.907 | NA    | NA    | NA    | QT      | 0.000 | 0.000 | F    |
| PGS003509 | Fat Body Mass                                   | 0.426  | 0.340  | 1.255 | NA    | NA    | NA    | QT      | 0.000 | 0.000 | F    |
| PGS003513 | Grip Strength Measurement                       | 0.206  | 0.358  | 0.576 | NA    | NA    | NA    | QT      | 0.000 | 0.000 | M    |
| PGS003514 | Body Height                                     | 0.446  | 0.489  | 0.912 | NA    | NA    | NA    | QT      | 0.000 | 0.000 | M    |
| PGS003515 | Reticulocyte Measurement                        | 0.141  | 0.148  | 0.953 | NA    | NA    | NA    | QT      | 0.018 | 0.030 | M    |
| PGS003517 | Low-Density Lipoprotein Cholesterol Measuremer  | 0.382  | 0.323  | 1.181 | NA    | NA    | NA    | QT      | 0.000 | 0.000 | F    |
| PGS003521 | Alkaline Phosphatase Measurement                | 0.428  | 0.432  | 0.992 | NA    | NA    | NA    | QT      | 0.158 | 0.227 | None |
| PGS003522 | Serum Alanine Aminotransferase Measurement      | 0.258  | 0.361  | 0.715 | NA    | NA    | NA    | QT      | 0.000 | 0.000 | M    |
| PGS003523 | Aspartate Aminotransferase Measurement          | 0.240  | 0.308  | 0.779 | NA    | NA    | NA    | QT      | 0.000 | 0.000 | M    |
| PGS003524 | Bilirubin Measurement                           | 0.400  | 0.521  | 0.767 | NA    | NA    | NA    | QT      | 0.000 | 0.000 | M    |
| PGS003525 | Body Mass Index                                 | 0.577  | 0.457  | 1.264 | NA    | NA    | NA    | QT      | 0.000 | 0.000 | F    |
| PGS003526 | Creatinine Measurement                          | 0.281  | 0.344  | 0.816 | NA    | NA    | NA    | QT      | 0.000 | 0.000 | M    |
| PGS003527 | C-Reactive Protein Measurement                  | 0.290  | 0.234  | 1.237 | NA    | NA    | NA    | QT      | 0.000 | 0.000 | F    |
| PGS003528 | Cystatin C Measurement                          | 0.381  | 0.393  | 0.970 | NA    | NA    | NA    | QT      | 0.000 | 0.000 | M    |
| PGS003529 | QRS Duration                                    | 0.238  | 0.295  | 0.808 | NA    | NA    | NA    | QT      | 0.000 | 0.000 | M    |
| PGS003530 | Eosinophil Percentage of Leukocytes             | 0.288  | 0.336  | 0.858 | NA    | NA    | NA    | QT      | 0.000 | 0.000 | M    |
| PGS003532 | Fat Body Mass                                   | 0.401  | 0.321  | 1.249 | NA    | NA    | NA    | QT      | 0.000 | 0.000 | F    |
| PGS003533 | HbA1c Measurement                               | 0.312  | 0.415  | 0.752 | NA    | NA    | NA    | QT      | 0.000 | 0.000 | M    |
| PGS003534 | High-Density Lipoprotein Cholesterol Measuremer | 0.514  | 0.415  | 1.238 | NA    | NA    | NA    | QT      | 0.000 | 0.000 | F    |
| PGS003535 | Bone Density                                    | 0.465  | 0.531  | 0.876 | NA    | NA    | NA    | QT      | 0.000 | 0.000 | M    |
| PGS003537 | Bone Density                                    | 0.454  | 0.539  | 0.842 | NA    | NA    | NA    | QT      | 0.000 | 0.000 | M    |
| PGS003538 | Waist Hip Ratio                                 | 0.075  | 0.140  | 0.534 | NA    | NA    | NA    | QT      | 0.000 | 0.000 | M    |
| PGS003539 | IGF-1 Measurement                               | 0.468  | 0.474  | 0.987 | NA    | NA    | NA    | QT      | 0.014 | 0.024 | M    |
| PGS003540 | Whole-Body Water Mass                           | -0.182 | -0.256 | 0.708 | NA    | NA    | NA    | QT      | 0.000 | 0.000 | M    |
| PGS003541 | Leukocyte Count                                 | 0.400  | 0.399  | 1.002 | NA    | NA    | NA    | QT      | 0.760 | 0.817 | None |
| PGS003542 | Lipoprotein(a) Measurement                      | 0.561  | 0.561  | 1.000 | NA    | NA    | NA    | QT      | 0.981 | 0.986 | None |
| PGS003543 | Serum Gamma-Glutamyl Transferase Measureme      | 0.252  | 0.347  | 0.725 | NA    | NA    | NA    | QT      | 0.000 | 0.000 | M    |
| PGS003544 | Monocyte Count                                  | 0.328  | 0.379  | 0.866 | NA    | NA    | NA    | QT      | 0.000 | 0.000 | M    |
| PGS003545 | Neutrophil Count                                | 0.412  | 0.418  | 0.987 | NA    | NA    | NA    | QT      | 0.043 | 0.069 | M    |
| PGS003546 | Platelet Count                                  | 0.535  | 0.484  | 1.105 | NA    | NA    | NA    | QT      | 0.000 | 0.000 | F    |
| PGS003547 | Platelet Crit                                   | 0.492  | 0.451  | 1.091 | NA    | NA    | NA    | QT      | 0.000 | 0.000 | F    |
| PGS003548 | Mean Platelet Volume                            | 0.609  | 0.597  | 1.021 | NA    | NA    | NA    | QT      | 0.000 | 0.000 | F    |
| PGS003549 | Platelet Component Distribution Width           | 0.474  | 0.504  | 0.940 | NA    | NA    | NA    | QT      | 0.000 | 0.000 | M    |
| PGS003551 | Reticulocyte Count                              | 0.279  | 0.303  | 0.920 | NA    | NA    | NA    | QT      | 0.000 | 0.000 | M    |
| PGS003553 | Urea Measurement                                | 0.325  | 0.370  | 0.878 | NA    | NA    | NA    | QT      | 0.000 | 0.000 | M    |
| PGS003554 | Vitamin D Measurement                           | 0.292  | 0.300  | 0.972 | NA    | NA    | NA    | QT      | 0.003 | 0.005 | M    |
| PGS003555 | Waist Hip Ratio                                 | 0.269  | 0.267  | 1.008 | NA    | NA    | NA    | QT      | 0.284 | 0.378 | None |
| PGS003556 | Whole-Body Water Mass                           | 0.238  | 0.391  | 0.608 | NA    | NA    | NA    | QT      | 0.000 | 0.000 | M    |
| PGS003557 | Lymphocyte Percentage of Leukocytes             | 0.411  | 0.403  | 1.019 | NA    | NA    | NA    | QT      | 0.004 | 0.007 | F    |
| PGS003559 | Testosterone Measurement                        | 0.002  | 0.264  | 0.006 | NA    | NA    | NA    | QT      | 0.000 | 0.000 | M    |
| PGS003560 | Mean Corpuscular Hemoglobin                     | 0.430  | 0.424  | 1.013 | NA    | NA    | NA    | QT      | 0.024 | 0.040 | F    |
| PGS003561 | Mean Corpuscular Volume                         | 0.471  | 0.462  | 1.020 | NA    | NA    | NA    | QT      | 0.000 | 0.000 | F    |

|           |                                     |        |       |        |       |       |       |         |       |       |      |
|-----------|-------------------------------------|--------|-------|--------|-------|-------|-------|---------|-------|-------|------|
| PGS003562 | Monocyte Percentage of Leukocytes   | 0.324  | 0.369 | 0.877  | NA    | NA    | NA    | QT      | 0.000 | 0.000 | M    |
| PGS003566 | Neutrophil Percentage of Leukocytes | 0.391  | 0.398 | 0.982  | NA    | NA    | NA    | QT      | 0.006 | 0.011 | M    |
| PGS003567 | Mean Reticulocyte Volume            | 0.437  | 0.441 | 0.990  | NA    | NA    | NA    | QT      | 0.103 | 0.155 | None |
| PGS003570 | Mean Corpuscular Volume             | 0.379  | 0.375 | 1.009  | NA    | NA    | NA    | QT      | 0.180 | 0.255 | None |
| PGS003571 | Systolic Blood Pressure             | 0.432  | 0.378 | 1.143  | NA    | NA    | NA    | QT      | 0.000 | 0.000 | F    |
| PGS003572 | Urate Measurement                   | 0.397  | 0.374 | 1.063  | NA    | NA    | NA    | QT      | 0.000 | 0.000 | F    |
| PGS003574 | Alzheimer's Disease                 | 0.913  | 0.715 | 1.277  | 2.492 | 2.044 | 1.219 | Disease | 0.000 | 0.000 | F    |
| PGS003588 | Systolic Blood Pressure             | 0.198  | 0.164 | 1.207  | NA    | NA    | NA    | QT      | 0.000 | 0.000 | F    |
| PGS003589 | Cystatin C Measurement              | 0.328  | 0.347 | 0.946  | NA    | NA    | NA    | QT      | 0.000 | 0.000 | M    |
| PGS003590 | Cystatin C Measurement              | 0.246  | 0.256 | 0.960  | NA    | NA    | NA    | QT      | 0.000 | 0.000 | M    |
| PGS003591 | Hippocampal Volume                  | 0.318  | 0.377 | 0.843  | NA    | NA    | NA    | QT      | 0.000 | 0.000 | M    |
| PGS003592 | Hippocampal Volume                  | 0.171  | 0.214 | 0.800  | NA    | NA    | NA    | QT      | 0.000 | 0.000 | M    |
| PGS003593 | Hippocampal Volume                  | 0.294  | 0.349 | 0.841  | NA    | NA    | NA    | QT      | 0.000 | 0.000 | M    |
| PGS003594 | Hippocampal Volume                  | 0.106  | 0.125 | 0.841  | NA    | NA    | NA    | QT      | 0.013 | 0.023 | M    |
| PGS003595 | Hippocampal Volume                  | 0.282  | 0.334 | 0.844  | NA    | NA    | NA    | QT      | 0.000 | 0.000 | M    |
| PGS003596 | Hippocampal Volume                  | 0.163  | 0.202 | 0.805  | NA    | NA    | NA    | QT      | 0.000 | 0.000 | M    |
| PGS003597 | Hippocampal Volume                  | 0.150  | 0.184 | 0.813  | NA    | NA    | NA    | QT      | 0.000 | 0.000 | M    |
| PGS003598 | Hippocampal Volume                  | 0.287  | 0.348 | 0.825  | NA    | NA    | NA    | QT      | 0.000 | 0.000 | M    |
| PGS003599 | Hippocampal Volume                  | 0.005  | 0.016 | 0.337  | NA    | NA    | NA    | QT      | 0.203 | 0.283 | None |
| PGS003600 | Hippocampal Volume                  | 0.012  | 0.010 | 1.261  | NA    | NA    | NA    | QT      | 0.754 | 0.814 | None |
| PGS003601 | Hippocampal Volume                  | 0.025  | 0.018 | 1.421  | NA    | NA    | NA    | QT      | 0.358 | 0.458 | None |
| PGS003602 | Hippocampal Volume                  | 0.016  | 0.015 | 1.028  | NA    | NA    | NA    | QT      | 0.958 | 0.972 | None |
| PGS003603 | Hippocampal Volume                  | 0.194  | 0.218 | 0.886  | NA    | NA    | NA    | QT      | 0.002 | 0.003 | M    |
| PGS003604 | Hippocampal Volume                  | 0.137  | 0.147 | 0.932  | NA    | NA    | NA    | QT      | 0.216 | 0.298 | None |
| PGS003605 | Hippocampal Volume                  | 0.189  | 0.215 | 0.876  | NA    | NA    | NA    | QT      | 0.001 | 0.001 | M    |
| PGS003606 | Hippocampal Volume                  | 0.202  | 0.239 | 0.841  | NA    | NA    | NA    | QT      | 0.000 | 0.000 | M    |
| PGS003607 | Hippocampal Volume                  | 0.011  | 0.007 | 1.576  | NA    | NA    | NA    | QT      | 0.629 | 0.713 | None |
| PGS003608 | Hippocampal Volume                  | 0.024  | 0.008 | 2.992  | NA    | NA    | NA    | QT      | 0.051 | 0.082 | None |
| PGS003609 | Hippocampal Volume                  | 0.267  | 0.311 | 0.858  | NA    | NA    | NA    | QT      | 0.000 | 0.000 | M    |
| PGS003610 | Hippocampal Volume                  | 0.223  | 0.259 | 0.862  | NA    | NA    | NA    | QT      | 0.000 | 0.000 | M    |
| PGS003611 | Hippocampal Volume                  | 0.243  | 0.284 | 0.854  | NA    | NA    | NA    | QT      | 0.000 | 0.000 | M    |
| PGS003612 | Hippocampal Volume                  | 0.323  | 0.379 | 0.853  | NA    | NA    | NA    | QT      | 0.000 | 0.000 | M    |
| PGS003613 | Hippocampal Volume                  | 0.053  | 0.063 | 0.840  | NA    | NA    | NA    | QT      | 0.215 | 0.297 | None |
| PGS003614 | Hippocampal Volume                  | 0.349  | 0.407 | 0.858  | NA    | NA    | NA    | QT      | 0.000 | 0.000 | M    |
| PGS003615 | Hippocampal Volume                  | 0.285  | 0.335 | 0.851  | NA    | NA    | NA    | QT      | 0.000 | 0.000 | M    |
| PGS003616 | Hippocampal Volume                  | 0.371  | 0.435 | 0.855  | NA    | NA    | NA    | QT      | 0.000 | 0.000 | M    |
| PGS003617 | Hippocampal Volume                  | 0.001  | 0.008 | 0.115  | NA    | NA    | NA    | QT      | 0.399 | 0.501 | None |
| PGS003618 | Hippocampal Volume                  | 0.001  | 0.001 | 2.166  | NA    | NA    | NA    | QT      | 0.924 | 0.951 | None |
| PGS003619 | Hippocampal Volume                  | -0.002 | 0.016 | -0.121 | NA    | NA    | NA    | QT      | 0.026 | 0.043 | M    |
| PGS003620 | Hippocampal Volume                  | 0.023  | 0.018 | 1.283  | NA    | NA    | NA    | QT      | 0.533 | 0.627 | None |
| PGS003621 | Hippocampal Volume                  | 0.250  | 0.286 | 0.875  | NA    | NA    | NA    | QT      | 0.000 | 0.000 | M    |
| PGS003622 | Hippocampal Volume                  | 0.249  | 0.293 | 0.852  | NA    | NA    | NA    | QT      | 0.000 | 0.000 | M    |
| PGS003623 | Hippocampal Volume                  | 0.244  | 0.292 | 0.835  | NA    | NA    | NA    | QT      | 0.000 | 0.000 | M    |
| PGS003624 | Hippocampal Volume                  | 0.133  | 0.158 | 0.838  | NA    | NA    | NA    | QT      | 0.001 | 0.003 | M    |
| PGS003625 | Hippocampal Volume                  | 0.164  | 0.199 | 0.821  | NA    | NA    | NA    | QT      | 0.000 | 0.000 | M    |
| PGS003626 | Hippocampal Volume                  | 0.256  | 0.300 | 0.854  | NA    | NA    | NA    | QT      | 0.000 | 0.000 | M    |
| PGS003627 | Hippocampal Volume                  | 0.210  | 0.256 | 0.821  | NA    | NA    | NA    | QT      | 0.000 | 0.000 | M    |
| PGS003628 | Hippocampal Volume                  | 0.231  | 0.283 | 0.816  | NA    | NA    | NA    | QT      | 0.000 | 0.000 | M    |
| PGS003629 | Hippocampal Volume                  | 0.005  | 0.011 | 0.482  | NA    | NA    | NA    | QT      | 0.492 | 0.589 | None |
| PGS003630 | Hippocampal Volume                  | 0.010  | 0.011 | 0.900  | NA    | NA    | NA    | QT      | 0.891 | 0.926 | None |
| PGS003631 | Hippocampal Volume                  | 0.013  | 0.016 | 0.792  | NA    | NA    | NA    | QT      | 0.674 | 0.750 | None |
| PGS003632 | Hippocampal Volume                  | 0.014  | 0.010 | 1.391  | NA    | NA    | NA    | QT      | 0.637 | 0.719 | None |
| PGS003633 | Hippocampal Volume                  | 0.333  | 0.390 | 0.853  | NA    | NA    | NA    | QT      | 0.000 | 0.000 | M    |
| PGS003634 | Hippocampal Volume                  | 0.170  | 0.211 | 0.808  | NA    | NA    | NA    | QT      | 0.000 | 0.000 | M    |
| PGS003635 | Hippocampal Volume                  | 0.287  | 0.344 | 0.834  | NA    | NA    | NA    | QT      | 0.000 | 0.000 | M    |
| PGS003636 | Hippocampal Volume                  | 0.270  | 0.317 | 0.850  | NA    | NA    | NA    | QT      | 0.000 | 0.000 | M    |

|           |                    |       |        |        |    |    |    |    |       |       |      |
|-----------|--------------------|-------|--------|--------|----|----|----|----|-------|-------|------|
| PGS003637 | Hippocampal Volume | 0.356 | 0.413  | 0.861  | NA | NA | NA | QT | 0.000 | 0.000 | M    |
| PGS003638 | Hippocampal Volume | 0.208 | 0.263  | 0.792  | NA | NA | NA | QT | 0.000 | 0.000 | M    |
| PGS003639 | Hippocampal Volume | 0.248 | 0.294  | 0.841  | NA | NA | NA | QT | 0.000 | 0.000 | M    |
| PGS003640 | Hippocampal Volume | 0.175 | 0.209  | 0.839  | NA | NA | NA | QT | 0.000 | 0.000 | M    |
| PGS003641 | Hippocampal Volume | 0.002 | 0.008  | 0.269  | NA | NA | NA | QT | 0.454 | 0.554 | None |
| PGS003642 | Hippocampal Volume | 0.010 | 0.008  | 1.336  | NA | NA | NA | QT | 0.745 | 0.807 | None |
| PGS003643 | Hippocampal Volume | 0.023 | 0.016  | 1.459  | NA | NA | NA | QT | 0.365 | 0.466 | None |
| PGS003644 | Hippocampal Volume | 0.009 | 0.014  | 0.666  | NA | NA | NA | QT | 0.575 | 0.665 | None |
| PGS003645 | Hippocampal Volume | 0.177 | 0.204  | 0.868  | NA | NA | NA | QT | 0.001 | 0.001 | M    |
| PGS003646 | Hippocampal Volume | 0.128 | 0.145  | 0.882  | NA | NA | NA | QT | 0.033 | 0.054 | M    |
| PGS003647 | Hippocampal Volume | 0.160 | 0.182  | 0.878  | NA | NA | NA | QT | 0.005 | 0.009 | M    |
| PGS003648 | Hippocampal Volume | 0.147 | 0.171  | 0.863  | NA | NA | NA | QT | 0.003 | 0.006 | M    |
| PGS003649 | Hippocampal Volume | 0.011 | 0.018  | 0.648  | NA | NA | NA | QT | 0.447 | 0.547 | None |
| PGS003650 | Hippocampal Volume | 0.009 | 0.003  | 2.778  | NA | NA | NA | QT | 0.480 | 0.579 | None |
| PGS003651 | Hippocampal Volume | 0.162 | 0.192  | 0.844  | NA | NA | NA | QT | 0.000 | 0.000 | M    |
| PGS003652 | Hippocampal Volume | 0.110 | 0.121  | 0.907  | NA | NA | NA | QT | 0.159 | 0.229 | None |
| PGS003653 | Hippocampal Volume | 0.117 | 0.127  | 0.918  | NA | NA | NA | QT | 0.194 | 0.271 | None |
| PGS003654 | Hippocampal Volume | 0.121 | 0.133  | 0.912  | NA | NA | NA | QT | 0.146 | 0.212 | None |
| PGS003655 | Hippocampal Volume | 0.010 | 0.019  | 0.537  | NA | NA | NA | QT | 0.289 | 0.383 | None |
| PGS003656 | Hippocampal Volume | 0.021 | 0.024  | 0.847  | NA | NA | NA | QT | 0.647 | 0.728 | None |
| PGS003657 | Hippocampal Volume | 0.262 | 0.305  | 0.860  | NA | NA | NA | QT | 0.000 | 0.000 | M    |
| PGS003658 | Hippocampal Volume | 0.314 | 0.366  | 0.856  | NA | NA | NA | QT | 0.000 | 0.000 | M    |
| PGS003659 | Hippocampal Volume | 0.210 | 0.247  | 0.852  | NA | NA | NA | QT | 0.000 | 0.000 | M    |
| PGS003660 | Hippocampal Volume | 0.410 | 0.473  | 0.867  | NA | NA | NA | QT | 0.000 | 0.000 | M    |
| PGS003661 | Hippocampal Volume | 0.183 | 0.214  | 0.857  | NA | NA | NA | QT | 0.000 | 0.000 | M    |
| PGS003662 | Hippocampal Volume | 0.369 | 0.425  | 0.869  | NA | NA | NA | QT | 0.000 | 0.000 | M    |
| PGS003663 | Hippocampal Volume | 0.204 | 0.235  | 0.867  | NA | NA | NA | QT | 0.000 | 0.000 | M    |
| PGS003664 | Hippocampal Volume | 0.345 | 0.409  | 0.844  | NA | NA | NA | QT | 0.000 | 0.000 | M    |
| PGS003665 | Hippocampal Volume | 0.168 | 0.193  | 0.866  | NA | NA | NA | QT | 0.001 | 0.002 | M    |
| PGS003666 | Hippocampal Volume | 0.428 | 0.496  | 0.863  | NA | NA | NA | QT | 0.000 | 0.000 | M    |
| PGS003667 | Hippocampal Volume | 0.319 | 0.381  | 0.837  | NA | NA | NA | QT | 0.000 | 0.000 | M    |
| PGS003668 | Hippocampal Volume | 0.312 | 0.362  | 0.861  | NA | NA | NA | QT | 0.000 | 0.000 | M    |
| PGS003669 | Hippocampal Volume | 0.030 | 0.025  | 1.186  | NA | NA | NA | QT | 0.568 | 0.657 | None |
| PGS003670 | Hippocampal Volume | 0.033 | 0.022  | 1.503  | NA | NA | NA | QT | 0.176 | 0.250 | None |
| PGS003671 | Hippocampal Volume | 0.019 | 0.016  | 1.213  | NA | NA | NA | QT | 0.676 | 0.752 | None |
| PGS003672 | Hippocampal Volume | 0.006 | 0.014  | 0.419  | NA | NA | NA | QT | 0.300 | 0.394 | None |
| PGS003673 | Hippocampal Volume | 0.025 | 0.024  | 1.076  | NA | NA | NA | QT | 0.825 | 0.868 | None |
| PGS003674 | Hippocampal Volume | 0.032 | 0.019  | 1.699  | NA | NA | NA | QT | 0.107 | 0.161 | None |
| PGS003675 | Hippocampal Volume | 0.069 | 0.125  | 0.554  | NA | NA | NA | QT | 0.000 | 0.000 | M    |
| PGS003676 | Hippocampal Volume | 0.092 | 0.144  | 0.638  | NA | NA | NA | QT | 0.000 | 0.000 | M    |
| PGS003677 | Hippocampal Volume | 0.066 | 0.128  | 0.518  | NA | NA | NA | QT | 0.000 | 0.000 | M    |
| PGS003678 | Hippocampal Volume | 0.097 | 0.147  | 0.662  | NA | NA | NA | QT | 0.000 | 0.000 | M    |
| PGS003679 | Hippocampal Volume | 0.015 | -0.008 | -1.897 | NA | NA | NA | QT | 0.006 | 0.011 | F    |
| PGS003680 | Hippocampal Volume | 0.003 | -0.002 | -1.499 | NA | NA | NA | QT | 0.607 | 0.693 | None |
| PGS003681 | Hippocampal Volume | 0.284 | 0.336  | 0.845  | NA | NA | NA | QT | 0.000 | 0.000 | M    |
| PGS003682 | Hippocampal Volume | 0.293 | 0.347  | 0.845  | NA | NA | NA | QT | 0.000 | 0.000 | M    |
| PGS003683 | Hippocampal Volume | 0.322 | 0.369  | 0.874  | NA | NA | NA | QT | 0.000 | 0.000 | M    |
| PGS003684 | Hippocampal Volume | 0.236 | 0.284  | 0.830  | NA | NA | NA | QT | 0.000 | 0.000 | M    |
| PGS003685 | Hippocampal Volume | 0.317 | 0.383  | 0.830  | NA | NA | NA | QT | 0.000 | 0.000 | M    |
| PGS003686 | Hippocampal Volume | 0.056 | 0.063  | 0.894  | NA | NA | NA | QT | 0.413 | 0.516 | None |
| PGS003687 | Hippocampal Volume | 0.258 | 0.305  | 0.848  | NA | NA | NA | QT | 0.000 | 0.000 | M    |
| PGS003688 | Hippocampal Volume | 0.197 | 0.244  | 0.807  | NA | NA | NA | QT | 0.000 | 0.000 | M    |
| PGS003689 | Hippocampal Volume | 0.020 | 0.026  | 0.779  | NA | NA | NA | QT | 0.482 | 0.580 | None |
| PGS003690 | Hippocampal Volume | 0.008 | 0.024  | 0.337  | NA | NA | NA | QT | 0.054 | 0.086 | None |
| PGS003691 | Hippocampal Volume | 0.023 | 0.021  | 1.103  | NA | NA | NA | QT | 0.789 | 0.841 | None |
| PGS003692 | Hippocampal Volume | 0.024 | 0.020  | 1.241  | NA | NA | NA | QT | 0.559 | 0.651 | None |

|           |                              |        |        |       |       |       |       |         |       |       |      |
|-----------|------------------------------|--------|--------|-------|-------|-------|-------|---------|-------|-------|------|
| PGS003693 | Hippocampal Volume           | 0.103  | 0.105  | 0.978 | NA    | NA    | NA    | QT      | 0.779 | 0.832 | None |
| PGS003694 | Hippocampal Volume           | 0.129  | 0.126  | 1.025 | NA    | NA    | NA    | QT      | 0.693 | 0.765 | None |
| PGS003695 | Hippocampal Volume           | 0.079  | 0.082  | 0.967 | NA    | NA    | NA    | QT      | 0.742 | 0.805 | None |
| PGS003696 | Hippocampal Volume           | 0.135  | 0.131  | 1.027 | NA    | NA    | NA    | QT      | 0.656 | 0.736 | None |
| PGS003697 | Hippocampal Volume           | -0.001 | -0.007 | 0.202 | NA    | NA    | NA    | QT      | 0.469 | 0.568 | None |
| PGS003698 | Hippocampal Volume           | 0.002  | 0.004  | 0.385 | NA    | NA    | NA    | QT      | 0.746 | 0.808 | None |
| PGS003699 | Hippocampal Volume           | 0.305  | 0.343  | 0.890 | NA    | NA    | NA    | QT      | 0.000 | 0.000 | M    |
| PGS003700 | Hippocampal Volume           | 0.211  | 0.215  | 0.984 | NA    | NA    | NA    | QT      | 0.660 | 0.740 | None |
| PGS003701 | Hippocampal Volume           | 0.273  | 0.304  | 0.899 | NA    | NA    | NA    | QT      | 0.000 | 0.000 | M    |
| PGS003702 | Hippocampal Volume           | 0.244  | 0.260  | 0.937 | NA    | NA    | NA    | QT      | 0.036 | 0.059 | M    |
| PGS003703 | Hippocampal Volume           | 0.312  | 0.353  | 0.883 | NA    | NA    | NA    | QT      | 0.000 | 0.000 | M    |
| PGS003704 | Hippocampal Volume           | 0.231  | 0.235  | 0.984 | NA    | NA    | NA    | QT      | 0.632 | 0.715 | None |
| PGS003705 | Hippocampal Volume           | 0.125  | 0.144  | 0.868 | NA    | NA    | NA    | QT      | 0.018 | 0.030 | M    |
| PGS003706 | Hippocampal Volume           | 0.258  | 0.278  | 0.929 | NA    | NA    | NA    | QT      | 0.010 | 0.018 | M    |
| PGS003707 | Hippocampal Volume           | 0.016  | 0.009  | 1.804 | NA    | NA    | NA    | QT      | 0.371 | 0.471 | None |
| PGS003708 | Hippocampal Volume           | 0.014  | 0.008  | 1.766 | NA    | NA    | NA    | QT      | 0.450 | 0.550 | None |
| PGS003709 | Hippocampal Volume           | 0.015  | 0.013  | 1.134 | NA    | NA    | NA    | QT      | 0.826 | 0.869 | None |
| PGS003710 | Hippocampal Volume           | 0.023  | 0.018  | 1.297 | NA    | NA    | NA    | QT      | 0.518 | 0.613 | None |
| PGS003711 | Hippocampal Volume           | 0.227  | 0.267  | 0.849 | NA    | NA    | NA    | QT      | 0.000 | 0.000 | M    |
| PGS003712 | Hippocampal Volume           | 0.265  | 0.296  | 0.897 | NA    | NA    | NA    | QT      | 0.000 | 0.000 | M    |
| PGS003713 | Hippocampal Volume           | 0.171  | 0.194  | 0.881 | NA    | NA    | NA    | QT      | 0.004 | 0.007 | M    |
| PGS003714 | Hippocampal Volume           | 0.353  | 0.399  | 0.884 | NA    | NA    | NA    | QT      | 0.000 | 0.000 | M    |
| PGS003715 | Hippocampal Volume           | 0.260  | 0.305  | 0.852 | NA    | NA    | NA    | QT      | 0.000 | 0.000 | M    |
| PGS003716 | Hippocampal Volume           | 0.315  | 0.357  | 0.884 | NA    | NA    | NA    | QT      | 0.000 | 0.000 | M    |
| PGS003717 | Hippocampal Volume           | 0.114  | 0.123  | 0.928 | NA    | NA    | NA    | QT      | 0.270 | 0.361 | None |
| PGS003718 | Hippocampal Volume           | 0.269  | 0.308  | 0.875 | NA    | NA    | NA    | QT      | 0.000 | 0.000 | M    |
| PGS003719 | Hippocampal Volume           | 0.020  | 0.008  | 2.326 | NA    | NA    | NA    | QT      | 0.171 | 0.243 | None |
| PGS003720 | Hippocampal Volume           | 0.025  | 0.012  | 2.123 | NA    | NA    | NA    | QT      | 0.103 | 0.155 | None |
| PGS003721 | Hippocampal Volume           | 0.015  | 0.023  | 0.641 | NA    | NA    | NA    | QT      | 0.301 | 0.395 | None |
| PGS003722 | Hippocampal Volume           | 0.021  | 0.016  | 1.277 | NA    | NA    | NA    | QT      | 0.578 | 0.666 | None |
| PGS003725 | Coronary Artery Disease      | 0.461  | 0.599  | 0.770 | 1.586 | 1.820 | 0.871 | Disease | 0.000 | 0.000 | M    |
| PGS003726 | Coronary Artery Disease      | 0.424  | 0.575  | 0.737 | 1.528 | 1.777 | 0.860 | Disease | 0.000 | 0.000 | M    |
| PGS003727 | Coronary Artery Disease      | 0.396  | 0.533  | 0.744 | 1.486 | 1.704 | 0.872 | Disease | 0.000 | 0.000 | M    |
| PGS003728 | Type 2 Diabetes Mellitus     | 0.323  | 0.330  | 0.981 | 1.382 | 1.391 | 0.994 | Disease | 0.548 | 0.640 | None |
| PGS003729 | Type 2 Diabetes Mellitus     | 0.479  | 0.484  | 0.991 | 1.615 | 1.622 | 0.996 | Disease | 0.701 | 0.771 | None |
| PGS003730 | Type 2 Diabetes Mellitus     | 0.485  | 0.485  | 1.000 | 1.624 | 1.624 | 1.000 | Disease | 0.994 | 0.996 | None |
| PGS003731 | Type 2 Diabetes Mellitus     | 0.447  | 0.440  | 1.015 | 1.563 | 1.553 | 1.006 | Disease | 0.546 | 0.638 | None |
| PGS003732 | Type 2 Diabetes Mellitus     | 0.415  | 0.417  | 0.997 | 1.515 | 1.517 | 0.999 | Disease | 0.913 | 0.942 | None |
| PGS003733 | Type 2 Diabetes Mellitus     | 0.483  | 0.484  | 0.999 | 1.622 | 1.622 | 1.000 | Disease | 0.976 | 0.983 | None |
| PGS003734 | Type 2 Diabetes Mellitus     | 0.327  | 0.322  | 1.015 | 1.386 | 1.379 | 1.005 | Disease | 0.635 | 0.717 | None |
| PGS003735 | Type 2 Diabetes Mellitus     | 0.337  | 0.337  | 1.000 | 1.401 | 1.401 | 1.000 | Disease | 0.998 | 0.998 | None |
| PGS003736 | Urinary Bladder Carcinoma    | 0.258  | 0.220  | 1.172 | 1.294 | 1.246 | 1.039 | Disease | 0.231 | 0.316 | None |
| PGS003739 | Colorectal Cancer            | 0.350  | 0.380  | 0.923 | 1.420 | 1.462 | 0.971 | Disease | 0.188 | 0.264 | None |
| PGS003742 | Pancreatic Carcinoma         | 0.374  | 0.312  | 1.200 | 1.454 | 1.366 | 1.064 | Disease | 0.166 | 0.237 | None |
| PGS003744 | Renal Carcinoma              | 0.182  | 0.150  | 1.213 | 1.200 | 1.162 | 1.032 | Disease | 0.454 | 0.554 | None |
| PGS003745 | Melanoma                     | 0.438  | 0.457  | 0.959 | 1.550 | 1.580 | 0.981 | Disease | 0.469 | 0.569 | None |
| PGS003746 | Thyroid Carcinoma            | 0.398  | 0.545  | 0.731 | 1.489 | 1.725 | 0.863 | Disease | 0.062 | 0.097 | None |
| PGS003749 | Type 1 Diabetes Mellitus     | 0.504  | 0.410  | 1.230 | 1.655 | 1.506 | 1.099 | Disease | 0.000 | 0.001 | F    |
| PGS003750 | Type 1 Diabetes Mellitus     | 0.506  | 0.409  | 1.238 | 1.659 | 1.505 | 1.102 | Disease | 0.000 | 0.001 | F    |
| PGS003751 | Type 2 Diabetes Mellitus     | 0.299  | 0.292  | 1.022 | 1.348 | 1.339 | 1.007 | Disease | 0.528 | 0.622 | None |
| PGS003752 | Type 2 Diabetes Mellitus     | 0.297  | 0.289  | 1.030 | 1.346 | 1.335 | 1.009 | Disease | 0.395 | 0.497 | None |
| PGS003755 | Systemic Lupus Erythematosus | 0.366  | 0.298  | 1.230 | 1.442 | 1.347 | 1.071 | Disease | 0.483 | 0.581 | None |
| PGS003756 | Systemic Lupus Erythematosus | 0.366  | 0.298  | 1.230 | 1.442 | 1.347 | 1.071 | Disease | 0.483 | 0.581 | None |
| PGS003760 | Colorectal Cancer            | 0.004  | 0.018  | 0.216 | 1.004 | 1.018 | 0.986 | Disease | 0.513 | 0.609 | None |
| PGS003761 | Atrial Fibrillation          | 0.457  | 0.503  | 0.909 | 1.579 | 1.653 | 0.955 | Disease | 0.000 | 0.000 | M    |
| PGS003763 | Parkinson's Disease          | 0.303  | 0.250  | 1.211 | 1.353 | 1.284 | 1.054 | Disease | 0.088 | 0.135 | None |

|           |                                                 |        |        |        |    |    |    |    |       |       |      |
|-----------|-------------------------------------------------|--------|--------|--------|----|----|----|----|-------|-------|------|
| PGS003767 | ligh-Density Lipoprotein Cholesterol Measuremer | 0.379  | 0.308  | 1.231  | NA | NA | NA | QT | 0.000 | 0.000 | F    |
| PGS003768 | ligh-Density Lipoprotein Cholesterol Measuremer | 0.351  | 0.280  | 1.252  | NA | NA | NA | QT | 0.000 | 0.000 | F    |
| PGS003769 | ligh-Density Lipoprotein Cholesterol Measuremer | 0.256  | 0.212  | 1.207  | NA | NA | NA | QT | 0.000 | 0.000 | F    |
| PGS003770 | ligh-Density Lipoprotein Cholesterol Measuremer | 0.160  | 0.123  | 1.294  | NA | NA | NA | QT | 0.000 | 0.000 | F    |
| PGS003771 | ligh-Density Lipoprotein Cholesterol Measuremer | 0.008  | 0.003  | 2.904  | NA | NA | NA | QT | 0.067 | 0.105 | None |
| PGS003772 | ligh-Density Lipoprotein Cholesterol Measuremer | 0.355  | 0.288  | 1.231  | NA | NA | NA | QT | 0.000 | 0.000 | F    |
| PGS003773 | ligh-Density Lipoprotein Cholesterol Measuremer | 0.353  | 0.284  | 1.245  | NA | NA | NA | QT | 0.000 | 0.000 | F    |
| PGS003774 | ligh-Density Lipoprotein Cholesterol Measuremer | 0.253  | 0.212  | 1.197  | NA | NA | NA | QT | 0.000 | 0.000 | F    |
| PGS003775 | ligh-Density Lipoprotein Cholesterol Measuremer | 0.184  | 0.148  | 1.250  | NA | NA | NA | QT | 0.000 | 0.000 | F    |
| PGS003776 | ligh-Density Lipoprotein Cholesterol Measuremer | 0.008  | 0.002  | 3.645  | NA | NA | NA | QT | 0.027 | 0.045 | F    |
| PGS003777 | ligh-Density Lipoprotein Cholesterol Measuremer | 0.403  | 0.324  | 1.243  | NA | NA | NA | QT | 0.000 | 0.000 | F    |
| PGS003778 | ligh-Density Lipoprotein Cholesterol Measuremer | 0.375  | 0.305  | 1.231  | NA | NA | NA | QT | 0.000 | 0.000 | F    |
| PGS003779 | ligh-Density Lipoprotein Cholesterol Measuremer | 0.259  | 0.220  | 1.176  | NA | NA | NA | QT | 0.000 | 0.000 | F    |
| PGS003780 | ligh-Density Lipoprotein Cholesterol Measuremer | 0.161  | 0.134  | 1.201  | NA | NA | NA | QT | 0.000 | 0.000 | F    |
| PGS003781 | ligh-Density Lipoprotein Cholesterol Measuremer | 0.008  | 0.003  | 3.056  | NA | NA | NA | QT | 0.042 | 0.068 | F    |
| PGS003782 | ligh-Density Lipoprotein Cholesterol Measuremer | 0.406  | 0.329  | 1.235  | NA | NA | NA | QT | 0.000 | 0.000 | F    |
| PGS003783 | ligh-Density Lipoprotein Cholesterol Measuremer | 0.399  | 0.324  | 1.231  | NA | NA | NA | QT | 0.000 | 0.000 | F    |
| PGS003784 | .ow-Density Lipoprotein Cholesterol Measuremer  | 0.296  | 0.245  | 1.208  | NA | NA | NA | QT | 0.000 | 0.000 | F    |
| PGS003785 | .ow-Density Lipoprotein Cholesterol Measuremer  | 0.250  | 0.213  | 1.174  | NA | NA | NA | QT | 0.000 | 0.000 | F    |
| PGS003786 | .ow-Density Lipoprotein Cholesterol Measuremer  | 0.216  | 0.181  | 1.196  | NA | NA | NA | QT | 0.000 | 0.000 | F    |
| PGS003787 | .ow-Density Lipoprotein Cholesterol Measuremer  | 0.118  | 0.101  | 1.174  | NA | NA | NA | QT | 0.000 | 0.000 | F    |
| PGS003788 | .ow-Density Lipoprotein Cholesterol Measuremer  | -0.008 | -0.003 | 2.679  | NA | NA | NA | QT | 0.093 | 0.142 | None |
| PGS003789 | .ow-Density Lipoprotein Cholesterol Measuremer  | 0.262  | 0.225  | 1.161  | NA | NA | NA | QT | 0.000 | 0.000 | F    |
| PGS003790 | .ow-Density Lipoprotein Cholesterol Measuremer  | 0.274  | 0.226  | 1.215  | NA | NA | NA | QT | 0.000 | 0.000 | F    |
| PGS003791 | .ow-Density Lipoprotein Cholesterol Measuremer  | 0.127  | 0.109  | 1.170  | NA | NA | NA | QT | 0.000 | 0.000 | F    |
| PGS003792 | .ow-Density Lipoprotein Cholesterol Measuremer  | 0.114  | 0.094  | 1.208  | NA | NA | NA | QT | 0.000 | 0.000 | F    |
| PGS003793 | .ow-Density Lipoprotein Cholesterol Measuremer  | 0.009  | 0.003  | 2.679  | NA | NA | NA | QT | 0.063 | 0.100 | None |
| PGS003794 | .ow-Density Lipoprotein Cholesterol Measuremer  | 0.266  | 0.231  | 1.152  | NA | NA | NA | QT | 0.000 | 0.000 | F    |
| PGS003795 | .ow-Density Lipoprotein Cholesterol Measuremer  | 0.229  | 0.194  | 1.185  | NA | NA | NA | QT | 0.000 | 0.000 | F    |
| PGS003796 | .ow-Density Lipoprotein Cholesterol Measuremer  | 0.220  | 0.190  | 1.156  | NA | NA | NA | QT | 0.000 | 0.000 | F    |
| PGS003797 | .ow-Density Lipoprotein Cholesterol Measuremer  | 0.126  | 0.120  | 1.053  | NA | NA | NA | QT | 0.028 | 0.046 | F    |
| PGS003798 | .ow-Density Lipoprotein Cholesterol Measuremer  | 0.008  | 0.002  | 3.194  | NA | NA | NA | QT | 0.064 | 0.101 | None |
| PGS003799 | .ow-Density Lipoprotein Cholesterol Measuremer  | 0.320  | 0.274  | 1.169  | NA | NA | NA | QT | 0.000 | 0.000 | F    |
| PGS003800 | .ow-Density Lipoprotein Cholesterol Measuremer  | 0.302  | 0.252  | 1.198  | NA | NA | NA | QT | 0.000 | 0.000 | F    |
| PGS003801 | Triglyceride Measurement                        | 0.241  | 0.324  | 0.742  | NA | NA | NA | QT | 0.000 | 0.000 | M    |
| PGS003802 | Triglyceride Measurement                        | 0.253  | 0.341  | 0.744  | NA | NA | NA | QT | 0.000 | 0.000 | M    |
| PGS003803 | Triglyceride Measurement                        | 0.153  | 0.219  | 0.697  | NA | NA | NA | QT | 0.000 | 0.000 | M    |
| PGS003804 | Triglyceride Measurement                        | 0.150  | 0.219  | 0.682  | NA | NA | NA | QT | 0.000 | 0.000 | M    |
| PGS003805 | Triglyceride Measurement                        | 0.000  | 0.001  | -0.161 | NA | NA | NA | QT | 0.710 | 0.779 | None |
| PGS003806 | Triglyceride Measurement                        | 0.261  | 0.363  | 0.718  | NA | NA | NA | QT | 0.000 | 0.000 | M    |
| PGS003807 | Triglyceride Measurement                        | 0.232  | 0.316  | 0.732  | NA | NA | NA | QT | 0.000 | 0.000 | M    |
| PGS003808 | Triglyceride Measurement                        | 0.137  | 0.201  | 0.683  | NA | NA | NA | QT | 0.000 | 0.000 | M    |
| PGS003809 | Triglyceride Measurement                        | 0.141  | 0.201  | 0.702  | NA | NA | NA | QT | 0.000 | 0.000 | M    |
| PGS003810 | Triglyceride Measurement                        | 0.001  | 0.002  | 0.285  | NA | NA | NA | QT | 0.561 | 0.651 | None |
| PGS003811 | Triglyceride Measurement                        | 0.264  | 0.365  | 0.723  | NA | NA | NA | QT | 0.000 | 0.000 | M    |
| PGS003812 | Triglyceride Measurement                        | 0.238  | 0.326  | 0.731  | NA | NA | NA | QT | 0.000 | 0.000 | M    |
| PGS003813 | Triglyceride Measurement                        | 0.159  | 0.238  | 0.666  | NA | NA | NA | QT | 0.000 | 0.000 | M    |
| PGS003814 | Triglyceride Measurement                        | 0.165  | 0.250  | 0.661  | NA | NA | NA | QT | 0.000 | 0.000 | M    |
| PGS003815 | Triglyceride Measurement                        | 0.000  | 0.000  | -0.980 | NA | NA | NA | QT | 0.810 | 0.858 | None |
| PGS003816 | Triglyceride Measurement                        | 0.259  | 0.363  | 0.715  | NA | NA | NA | QT | 0.000 | 0.000 | M    |
| PGS003817 | Triglyceride Measurement                        | 0.248  | 0.346  | 0.718  | NA | NA | NA | QT | 0.000 | 0.000 | M    |
| PGS003818 | Total Cholesterol Measurement                   | 0.265  | 0.226  | 1.169  | NA | NA | NA | QT | 0.000 | 0.000 | F    |
| PGS003819 | Total Cholesterol Measurement                   | 0.243  | 0.212  | 1.145  | NA | NA | NA | QT | 0.000 | 0.000 | F    |
| PGS003820 | Total Cholesterol Measurement                   | 0.188  | 0.164  | 1.143  | NA | NA | NA | QT | 0.000 | 0.000 | F    |
| PGS003821 | Total Cholesterol Measurement                   | 0.159  | 0.141  | 1.126  | NA | NA | NA | QT | 0.000 | 0.000 | F    |
| PGS003822 | Total Cholesterol Measurement                   | -0.012 | -0.006 | 1.807  | NA | NA | NA | QT | 0.162 | 0.233 | None |

|           |                                                  |        |        |       |       |       |       |         |       |       |      |
|-----------|--------------------------------------------------|--------|--------|-------|-------|-------|-------|---------|-------|-------|------|
| PGS003823 | Total Cholesterol Measurement                    | 0.247  | 0.219  | 1.130 | NA    | NA    | NA    | QT      | 0.000 | 0.000 | F    |
| PGS003824 | Total Cholesterol Measurement                    | 0.249  | 0.211  | 1.178 | NA    | NA    | NA    | QT      | 0.000 | 0.000 | F    |
| PGS003825 | Total Cholesterol Measurement                    | 0.205  | 0.178  | 1.155 | NA    | NA    | NA    | QT      | 0.000 | 0.000 | F    |
| PGS003826 | Total Cholesterol Measurement                    | 0.197  | 0.172  | 1.148 | NA    | NA    | NA    | QT      | 0.000 | 0.000 | F    |
| PGS003827 | Total Cholesterol Measurement                    | 0.013  | 0.006  | 2.048 | NA    | NA    | NA    | QT      | 0.080 | 0.124 | None |
| PGS003828 | Total Cholesterol Measurement                    | 0.261  | 0.228  | 1.145 | NA    | NA    | NA    | QT      | 0.000 | 0.000 | F    |
| PGS003829 | Total Cholesterol Measurement                    | 0.234  | 0.204  | 1.149 | NA    | NA    | NA    | QT      | 0.000 | 0.000 | F    |
| PGS003830 | Total Cholesterol Measurement                    | 0.150  | 0.144  | 1.046 | NA    | NA    | NA    | QT      | 0.066 | 0.103 | None |
| PGS003831 | Total Cholesterol Measurement                    | 0.133  | 0.126  | 1.055 | NA    | NA    | NA    | QT      | 0.058 | 0.092 | None |
| PGS003832 | Total Cholesterol Measurement                    | 0.012  | 0.006  | 2.038 | NA    | NA    | NA    | QT      | 0.095 | 0.144 | None |
| PGS003833 | Total Cholesterol Measurement                    | 0.293  | 0.254  | 1.156 | NA    | NA    | NA    | QT      | 0.000 | 0.000 | F    |
| PGS003834 | Total Cholesterol Measurement                    | 0.259  | 0.224  | 1.159 | NA    | NA    | NA    | QT      | 0.000 | 0.000 | F    |
| PGS003835 | Body Height                                      | 0.205  | 0.224  | 0.918 | NA    | NA    | NA    | QT      | 0.000 | 0.000 | M    |
| PGS003836 | Body Height                                      | 0.272  | 0.295  | 0.920 | NA    | NA    | NA    | QT      | 0.000 | 0.000 | M    |
| PGS003837 | Body Height                                      | 0.028  | 0.035  | 0.810 | NA    | NA    | NA    | QT      | 0.001 | 0.002 | M    |
| PGS003838 | Body Height                                      | 0.084  | 0.090  | 0.933 | NA    | NA    | NA    | QT      | 0.002 | 0.004 | M    |
| PGS003839 | Body Height                                      | 0.009  | 0.011  | 0.819 | NA    | NA    | NA    | QT      | 0.335 | 0.433 | None |
| PGS003840 | Body Height                                      | 0.238  | 0.257  | 0.929 | NA    | NA    | NA    | QT      | 0.000 | 0.000 | M    |
| PGS003841 | Body Height                                      | 0.224  | 0.242  | 0.926 | NA    | NA    | NA    | QT      | 0.000 | 0.000 | M    |
| PGS003842 | Body Mass Index                                  | 0.151  | 0.129  | 1.178 | NA    | NA    | NA    | QT      | 0.000 | 0.000 | F    |
| PGS003843 | Body Mass Index                                  | 0.211  | 0.177  | 1.195 | NA    | NA    | NA    | QT      | 0.000 | 0.000 | F    |
| PGS003844 | Body Mass Index                                  | 0.027  | 0.022  | 1.223 | NA    | NA    | NA    | QT      | 0.077 | 0.120 | None |
| PGS003845 | Body Mass Index                                  | 0.036  | 0.029  | 1.257 | NA    | NA    | NA    | QT      | 0.008 | 0.014 | F    |
| PGS003846 | Body Mass Index                                  | 0.009  | 0.012  | 0.812 | NA    | NA    | NA    | QT      | 0.436 | 0.537 | None |
| PGS003847 | Body Mass Index                                  | 0.129  | 0.111  | 1.161 | NA    | NA    | NA    | QT      | 0.000 | 0.000 | F    |
| PGS003848 | Body Mass Index                                  | 0.165  | 0.142  | 1.165 | NA    | NA    | NA    | QT      | 0.000 | 0.000 | F    |
| PGS003850 | Colorectal Cancer                                | 0.417  | 0.444  | 0.940 | 1.518 | 1.559 | 0.974 | Disease | 0.235 | 0.321 | None |
| PGS003851 | Colorectal Cancer                                | 0.685  | 0.755  | 0.907 | 1.984 | 2.128 | 0.932 | Disease | 0.002 | 0.003 | M    |
| PGS003852 | Colorectal Cancer                                | 0.710  | 0.776  | 0.915 | 2.034 | 2.173 | 0.936 | Disease | 0.004 | 0.007 | M    |
| PGS003853 | Total Cholesterol Measurement                    | 0.173  | 0.153  | 1.130 | NA    | NA    | NA    | QT      | 0.000 | 0.000 | F    |
| PGS003854 | Triglyceride Measurement                         | 0.144  | 0.216  | 0.669 | NA    | NA    | NA    | QT      | 0.000 | 0.000 | M    |
| PGS003855 | Low-Density Lipoprotein Cholesterol Measurement  | 0.130  | 0.110  | 1.182 | NA    | NA    | NA    | QT      | 0.000 | 0.000 | F    |
| PGS003856 | High-Density Lipoprotein Cholesterol Measurement | 0.257  | 0.213  | 1.206 | NA    | NA    | NA    | QT      | 0.000 | 0.000 | F    |
| PGS003857 | Sleep Apnea                                      | 0.113  | 0.080  | 1.411 | 1.120 | 1.083 | 1.033 | Disease | 0.111 | 0.167 | None |
| PGS003858 | Sleep Apnea                                      | 0.028  | 0.049  | 0.577 | 1.029 | 1.050 | 0.980 | Disease | 0.319 | 0.415 | None |
| PGS003861 | Pulmonary Embolism                               | 0.014  | 0.019  | 0.714 | 1.014 | 1.019 | 0.995 | Disease | 0.792 | 0.844 | None |
| PGS003866 | Coronary Artery Disease                          | 0.556  | 0.731  | 0.761 | 1.744 | 2.076 | 0.840 | Disease | 0.000 | 0.000 | M    |
| PGS003867 | Type 2 Diabetes Mellitus                         | 0.765  | 0.777  | 0.985 | 2.150 | 2.175 | 0.988 | Disease | 0.301 | 0.395 | None |
| PGS003868 | Coronary Artery Disease                          | -0.011 | -0.005 | 1.994 | 0.989 | 0.995 | 0.995 | Disease | 0.574 | 0.664 | None |
| PGS003869 | Low-Density Lipoprotein Cholesterol Measurement  | 0.206  | 0.177  | 1.165 | NA    | NA    | NA    | QT      | 0.000 | 0.000 | F    |
| PGS003870 | Low-Density Lipoprotein Cholesterol Measurement  | 0.207  | 0.187  | 1.105 | NA    | NA    | NA    | QT      | 0.000 | 0.000 | F    |
| PGS003871 | Low-Density Lipoprotein Cholesterol Measurement  | 0.116  | 0.103  | 1.119 | NA    | NA    | NA    | QT      | 0.000 | 0.000 | F    |
| PGS003872 | Low-Density Lipoprotein Cholesterol Measurement  | 0.144  | 0.134  | 1.076 | NA    | NA    | NA    | QT      | 0.000 | 0.001 | F    |
| PGS003873 | Low-Density Lipoprotein Cholesterol Measurement  | 0.327  | 0.278  | 1.178 | NA    | NA    | NA    | QT      | 0.000 | 0.000 | F    |
| PGS003874 | Low-Density Lipoprotein Cholesterol Measurement  | 0.191  | 0.178  | 1.071 | NA    | NA    | NA    | QT      | 0.000 | 0.000 | F    |
| PGS003875 | High-Density Lipoprotein Cholesterol Measurement | 0.305  | 0.249  | 1.224 | NA    | NA    | NA    | QT      | 0.000 | 0.000 | F    |
| PGS003876 | High-Density Lipoprotein Cholesterol Measurement | 0.326  | 0.263  | 1.239 | NA    | NA    | NA    | QT      | 0.000 | 0.000 | F    |
| PGS003877 | High-Density Lipoprotein Cholesterol Measurement | 0.191  | 0.152  | 1.263 | NA    | NA    | NA    | QT      | 0.000 | 0.000 | F    |
| PGS003878 | High-Density Lipoprotein Cholesterol Measurement | 0.319  | 0.257  | 1.243 | NA    | NA    | NA    | QT      | 0.000 | 0.000 | F    |
| PGS003879 | High-Density Lipoprotein Cholesterol Measurement | 0.422  | 0.339  | 1.246 | NA    | NA    | NA    | QT      | 0.000 | 0.000 | F    |
| PGS003880 | High-Density Lipoprotein Cholesterol Measurement | 0.311  | 0.256  | 1.213 | NA    | NA    | NA    | QT      | 0.000 | 0.000 | F    |
| PGS003881 | Triglyceride Measurement                         | 0.273  | 0.376  | 0.725 | NA    | NA    | NA    | QT      | 0.000 | 0.000 | M    |
| PGS003882 | Systolic Blood Pressure                          | 0.345  | 0.284  | 1.217 | NA    | NA    | NA    | QT      | 0.000 | 0.000 | F    |
| PGS003883 | Diastolic Blood Pressure                         | 0.282  | 0.248  | 1.134 | NA    | NA    | NA    | QT      | 0.000 | 0.000 | F    |
| PGS003884 | Body Mass Index                                  | 0.221  | 0.197  | 1.119 | NA    | NA    | NA    | QT      | 0.000 | 0.000 | F    |
| PGS003885 | Body Mass Index                                  | 0.088  | 0.076  | 1.156 | NA    | NA    | NA    | QT      | 0.000 | 0.000 | F    |

|           |                                            |       |       |       |       |       |       |         |       |       |      |
|-----------|--------------------------------------------|-------|-------|-------|-------|-------|-------|---------|-------|-------|------|
| PGS003886 | Body Mass Index                            | 0.240 | 0.213 | 1.125 | NA    | NA    | NA    | QT      | 0.000 | 0.000 | F    |
| PGS003887 | Body Mass Index                            | 0.466 | 0.395 | 1.180 | NA    | NA    | NA    | QT      | 0.000 | 0.000 | F    |
| PGS003888 | Body Height                                | 0.219 | 0.238 | 0.917 | NA    | NA    | NA    | QT      | 0.000 | 0.000 | M    |
| PGS003889 | Body Height                                | 0.036 | 0.041 | 0.894 | NA    | NA    | NA    | QT      | 0.029 | 0.048 | M    |
| PGS003890 | Body Height                                | 0.253 | 0.274 | 0.923 | NA    | NA    | NA    | QT      | 0.000 | 0.000 | M    |
| PGS003891 | Body Height                                | 0.421 | 0.456 | 0.922 | NA    | NA    | NA    | QT      | 0.000 | 0.000 | M    |
| PGS003893 | Waist Hip Ratio                            | 0.232 | 0.241 | 0.962 | NA    | NA    | NA    | QT      | 0.000 | 0.000 | M    |
| PGS003894 | Waist Hip Ratio                            | 0.066 | 0.126 | 0.525 | NA    | NA    | NA    | QT      | 0.000 | 0.000 | M    |
| PGS003895 | Body Height                                | 0.468 | 0.514 | 0.911 | NA    | NA    | NA    | QT      | 0.000 | 0.000 | M    |
| PGS003897 | Body Mass Index                            | 0.537 | 0.422 | 1.273 | NA    | NA    | NA    | QT      | 0.000 | 0.000 | F    |
| PGS003898 | Body Weight                                | 0.444 | 0.466 | 0.952 | NA    | NA    | NA    | QT      | 0.000 | 0.000 | M    |
| PGS003899 | Fat Body Mass                              | 0.389 | 0.308 | 1.264 | NA    | NA    | NA    | QT      | 0.000 | 0.000 | F    |
| PGS003900 | Fat Body Mass                              | 0.367 | 0.276 | 1.331 | NA    | NA    | NA    | QT      | 0.000 | 0.000 | F    |
| PGS003902 | Whole-Body Water Mass                      | 0.224 | 0.395 | 0.567 | NA    | NA    | NA    | QT      | 0.000 | 0.000 | M    |
| PGS003903 | Basal Metabolic Rate Measurement           | 0.245 | 0.433 | 0.565 | NA    | NA    | NA    | QT      | 0.000 | 0.000 | M    |
| PGS003909 | Fat Body Mass                              | 0.352 | 0.293 | 1.201 | NA    | NA    | NA    | QT      | 0.000 | 0.000 | F    |
| PGS003910 | Fat Body Mass                              | 0.350 | 0.257 | 1.362 | NA    | NA    | NA    | QT      | 0.000 | 0.000 | F    |
| PGS003912 | Fat Body Mass                              | 0.359 | 0.295 | 1.218 | NA    | NA    | NA    | QT      | 0.000 | 0.000 | F    |
| PGS003913 | Fat Body Mass                              | 0.351 | 0.256 | 1.374 | NA    | NA    | NA    | QT      | 0.000 | 0.000 | F    |
| PGS003915 | Fat Body Mass                              | 0.379 | 0.266 | 1.424 | NA    | NA    | NA    | QT      | 0.000 | 0.000 | F    |
| PGS003916 | Fat Body Mass                              | 0.344 | 0.240 | 1.433 | NA    | NA    | NA    | QT      | 0.000 | 0.000 | F    |
| PGS003918 | Fat Body Mass                              | 0.377 | 0.275 | 1.373 | NA    | NA    | NA    | QT      | 0.000 | 0.000 | F    |
| PGS003919 | Fat Body Mass                              | 0.340 | 0.238 | 1.429 | NA    | NA    | NA    | QT      | 0.000 | 0.000 | F    |
| PGS003921 | Fat Body Mass                              | 0.379 | 0.299 | 1.265 | NA    | NA    | NA    | QT      | 0.000 | 0.000 | F    |
| PGS003922 | Fat Body Mass                              | 0.365 | 0.285 | 1.279 | NA    | NA    | NA    | QT      | 0.000 | 0.000 | F    |
| PGS003924 | Leukocyte Count                            | 0.366 | 0.396 | 0.924 | NA    | NA    | NA    | QT      | 0.000 | 0.000 | M    |
| PGS003925 | Erythrocyte Count                          | 0.403 | 0.447 | 0.901 | NA    | NA    | NA    | QT      | 0.000 | 0.000 | M    |
| PGS003928 | Mean Corpuscular Volume                    | 0.497 | 0.483 | 1.028 | NA    | NA    | NA    | QT      | 0.000 | 0.000 | F    |
| PGS003929 | Mean Corpuscular Hemoglobin                | 0.453 | 0.440 | 1.031 | NA    | NA    | NA    | QT      | 0.000 | 0.000 | F    |
| PGS003930 | Mean Corpuscular Hemoglobin Concentration  | 0.208 | 0.207 | 1.006 | NA    | NA    | NA    | QT      | 0.669 | 0.747 | None |
| PGS003931 | Red Blood Cell Distribution Width          | 0.380 | 0.316 | 1.200 | NA    | NA    | NA    | QT      | 0.000 | 0.000 | F    |
| PGS003932 | Platelet Count                             | 0.578 | 0.514 | 1.123 | NA    | NA    | NA    | QT      | 0.000 | 0.000 | F    |
| PGS003933 | Platelet Crit                              | 0.521 | 0.465 | 1.120 | NA    | NA    | NA    | QT      | 0.000 | 0.000 | F    |
| PGS003934 | Mean Platelet Volume                       | 0.658 | 0.642 | 1.025 | NA    | NA    | NA    | QT      | 0.000 | 0.000 | F    |
| PGS003935 | Platelet Component Distribution Width      | 0.509 | 0.542 | 0.940 | NA    | NA    | NA    | QT      | 0.000 | 0.000 | M    |
| PGS003936 | Lymphocyte Count                           | 0.207 | 0.271 | 0.763 | NA    | NA    | NA    | QT      | 0.000 | 0.000 | M    |
| PGS003937 | Monocyte Count                             | 0.338 | 0.388 | 0.871 | NA    | NA    | NA    | QT      | 0.000 | 0.000 | M    |
| PGS003938 | Neutrophil Count                           | 0.396 | 0.403 | 0.983 | NA    | NA    | NA    | QT      | 0.011 | 0.018 | M    |
| PGS003939 | Eosinophil Count                           | 0.368 | 0.427 | 0.862 | NA    | NA    | NA    | QT      | 0.000 | 0.000 | M    |
| PGS003940 | Basophil Count                             | 0.214 | 0.162 | 1.327 | NA    | NA    | NA    | QT      | 0.000 | 0.000 | F    |
| PGS003941 | Lymphocyte Percentage of Leukocytes        | 0.408 | 0.402 | 1.013 | NA    | NA    | NA    | QT      | 0.041 | 0.066 | F    |
| PGS003942 | Monocyte Percentage of Leukocytes          | 0.329 | 0.375 | 0.878 | NA    | NA    | NA    | QT      | 0.000 | 0.000 | M    |
| PGS003943 | Neutrophil Percentage of Leukocytes        | 0.379 | 0.386 | 0.981 | NA    | NA    | NA    | QT      | 0.005 | 0.009 | M    |
| PGS003944 | Eosinophil Percentage of Leukocytes        | 0.378 | 0.435 | 0.869 | NA    | NA    | NA    | QT      | 0.000 | 0.000 | M    |
| PGS003945 | Basophil Percentage of Leukocytes          | 0.210 | 0.149 | 1.412 | NA    | NA    | NA    | QT      | 0.000 | 0.000 | F    |
| PGS003946 | Reticulocyte Measurement                   | 0.245 | 0.280 | 0.874 | NA    | NA    | NA    | QT      | 0.000 | 0.000 | M    |
| PGS003947 | Reticulocyte Count                         | 0.260 | 0.306 | 0.849 | NA    | NA    | NA    | QT      | 0.000 | 0.000 | M    |
| PGS003948 | Mean Reticulocyte Volume                   | 0.460 | 0.463 | 0.995 | NA    | NA    | NA    | QT      | 0.333 | 0.430 | None |
| PGS003949 | Mean Corpuscular Volume                    | 0.386 | 0.380 | 1.016 | NA    | NA    | NA    | QT      | 0.022 | 0.037 | F    |
| PGS003950 | Immature Reticulocyte Fraction Measurement | 0.397 | 0.394 | 1.009 | NA    | NA    | NA    | QT      | 0.193 | 0.270 | None |
| PGS003951 | Reticulocyte Measurement                   | 0.226 | 0.257 | 0.881 | NA    | NA    | NA    | QT      | 0.000 | 0.000 | M    |
| PGS003952 | Reticulocyte Count                         | 0.270 | 0.314 | 0.862 | NA    | NA    | NA    | QT      | 0.000 | 0.000 | M    |
| PGS003953 | Alzheimer's Disease                        | 0.515 | 0.480 | 1.074 | 1.674 | 1.615 | 1.036 | Disease | 0.312 | 0.407 | None |
| PGS003954 | Alzheimer's Disease                        | 0.620 | 0.528 | 1.175 | 1.859 | 1.695 | 1.097 | Disease | 0.005 | 0.008 | F    |
| PGS003955 | Alzheimer's Disease                        | 0.677 | 0.580 | 1.167 | 1.967 | 1.786 | 1.102 | Disease | 0.001 | 0.002 | F    |
| PGS003956 | Alzheimer's Disease                        | 0.511 | 0.409 | 1.250 | 1.666 | 1.505 | 1.108 | Disease | 0.002 | 0.004 | F    |

|           |                                                 |        |        |       |       |       |       |         |       |       |      |
|-----------|-------------------------------------------------|--------|--------|-------|-------|-------|-------|---------|-------|-------|------|
| PGS003957 | Alzheimer's Disease                             | 0.350  | 0.355  | 0.987 | 1.419 | 1.426 | 0.995 | Disease | 0.893 | 0.927 | None |
| PGS003958 | Alzheimer's Disease                             | 0.753  | 0.646  | 1.165 | 2.123 | 1.909 | 1.112 | Disease | 0.001 | 0.001 | F    |
| PGS003959 | Obesity                                         | 0.381  | 0.368  | 1.037 | 1.464 | 1.444 | 1.014 | Disease | 0.212 | 0.293 | None |
| PGS003960 | Systemic Lupus Erythematosus                    | 0.445  | 0.277  | 1.609 | 1.561 | 1.319 | 1.184 | Disease | 0.064 | 0.101 | None |
| PGS003961 | Diastolic Blood Pressure                        | 0.048  | 0.043  | 1.118 | NA    | NA    | NA    | QT      | 0.082 | 0.126 | None |
| PGS003962 | Diastolic Blood Pressure                        | 0.084  | 0.072  | 1.180 | NA    | NA    | NA    | QT      | 0.000 | 0.000 | F    |
| PGS003963 | Diastolic Blood Pressure                        | 0.402  | 0.373  | 1.077 | NA    | NA    | NA    | QT      | 0.000 | 0.000 | F    |
| PGS003964 | Diastolic Blood Pressure                        | 0.385  | 0.356  | 1.083 | NA    | NA    | NA    | QT      | 0.000 | 0.000 | F    |
| PGS003965 | Systolic Blood Pressure                         | 0.055  | 0.044  | 1.257 | NA    | NA    | NA    | QT      | 0.000 | 0.000 | F    |
| PGS003966 | Systolic Blood Pressure                         | 0.097  | 0.078  | 1.239 | NA    | NA    | NA    | QT      | 0.000 | 0.000 | F    |
| PGS003967 | Systolic Blood Pressure                         | 0.426  | 0.360  | 1.183 | NA    | NA    | NA    | QT      | 0.000 | 0.000 | F    |
| PGS003968 | Systolic Blood Pressure                         | 0.403  | 0.339  | 1.188 | NA    | NA    | NA    | QT      | 0.000 | 0.000 | F    |
| PGS003969 | Heart Failure                                   | 0.161  | 0.173  | 0.930 | 1.175 | 1.189 | 0.988 | Disease | 0.432 | 0.534 | None |
| PGS003970 | Systolic Blood Pressure                         | -0.203 | -0.409 | 0.496 | NA    | NA    | NA    | QT      | 0.000 | 0.000 | M    |
| PGS003971 | Systolic Blood Pressure                         | -0.437 | -0.175 | 2.495 | NA    | NA    | NA    | QT      | 0.000 | 0.000 | F    |
| PGS003972 | Abdominal Aortic Aneurysm                       | 0.727  | 0.924  | 0.787 | 2.070 | 2.520 | 0.821 | Disease | 0.000 | 0.000 | M    |
| PGS003973 | Abdominal Aortic Aneurysm                       | 0.538  | 0.661  | 0.815 | 1.713 | 1.936 | 0.885 | Disease | 0.007 | 0.012 | M    |
| PGS003974 | .ow-Density Lipoprotein Cholesterol Measuremer  | 0.069  | 0.056  | 1.218 | NA    | NA    | NA    | QT      | 0.000 | 0.000 | F    |
| PGS003975 | .ow-Density Lipoprotein Cholesterol Measuremer  | 0.075  | 0.064  | 1.164 | NA    | NA    | NA    | QT      | 0.000 | 0.001 | F    |
| PGS003976 | .ow-Density Lipoprotein Cholesterol Measuremer  | 0.181  | 0.152  | 1.192 | NA    | NA    | NA    | QT      | 0.000 | 0.000 | F    |
| PGS003977 | .ow-Density Lipoprotein Cholesterol Measuremer  | 0.053  | 0.051  | 1.046 | NA    | NA    | NA    | QT      | 0.418 | 0.520 | None |
| PGS003978 | .ow-Density Lipoprotein Cholesterol Measuremer  | 0.175  | 0.147  | 1.191 | NA    | NA    | NA    | QT      | 0.000 | 0.000 | F    |
| PGS003979 | Colorectal Cancer                               | 0.757  | 0.835  | 0.907 | 2.132 | 2.305 | 0.925 | Disease | 0.001 | 0.001 | M    |
| PGS003980 | Body Mass Index                                 | 0.301  | 0.263  | 1.146 | NA    | NA    | NA    | QT      | 0.000 | 0.000 | F    |
| PGS003981 | Inflammatory Bowel Disease                      | 0.578  | 0.570  | 1.015 | 1.783 | 1.768 | 1.008 | Disease | 0.697 | 0.768 | None |
| PGS003982 | Type 2 Diabetes Mellitus                        | 0.484  | 0.472  | 1.026 | 1.622 | 1.603 | 1.012 | Disease | 0.258 | 0.349 | None |
| PGS003984 | Stroke                                          | 0.168  | 0.183  | 0.918 | 1.183 | 1.201 | 0.985 | Disease | 0.370 | 0.471 | None |
| PGS003986 | ligh-Density Lipoprotein Cholesterol Measuremer | 0.343  | 0.273  | 1.255 | NA    | NA    | NA    | QT      | 0.000 | 0.000 | F    |
| PGS003987 | HbA1c Measurement                               | 0.160  | 0.189  | 0.844 | NA    | NA    | NA    | QT      | 0.000 | 0.000 | M    |
| PGS003988 | Chronic Kidney Disease                          | 0.331  | 0.234  | 1.415 | 1.393 | 1.264 | 1.102 | Disease | 0.000 | 0.000 | F    |
| PGS003989 | Glomerular Filtration Rate                      | -0.177 | -0.204 | 0.867 | NA    | NA    | NA    | QT      | 0.000 | 0.000 | M    |
| PGS003990 | Gout                                            | 0.503  | 0.612  | 0.822 | 1.654 | 1.845 | 0.896 | Disease | 0.000 | 0.000 | M    |
| PGS003991 | Urate Measurement                               | 0.261  | 0.246  | 1.063 | NA    | NA    | NA    | QT      | 0.000 | 0.000 | F    |
| PGS003992 | Alzheimer's Disease                             | 0.654  | 0.585  | 1.116 | 1.922 | 1.796 | 1.071 | Disease | 0.052 | 0.084 | None |
| PGS003993 | Type 1 Diabetes Mellitus                        | 0.528  | 0.419  | 1.261 | 1.695 | 1.520 | 1.115 | Disease | 0.000 | 0.000 | F    |
| PGS003994 | Rheumatoid Arthritis                            | 0.262  | 0.305  | 0.860 | 1.300 | 1.356 | 0.958 | Disease | 0.050 | 0.080 | M    |
| PGS003995 | Body Height                                     | 0.417  | 0.454  | 0.920 | NA    | NA    | NA    | QT      | 0.000 | 0.000 | M    |
| PGS003996 | Body Mass Index                                 | 0.272  | 0.240  | 1.133 | NA    | NA    | NA    | QT      | 0.000 | 0.000 | F    |
| PGS003997 | Inflammatory Bowel Disease                      | 0.580  | 0.590  | 0.984 | 1.787 | 1.804 | 0.991 | Disease | 0.667 | 0.746 | None |
| PGS003998 | Type 2 Diabetes Mellitus                        | 0.426  | 0.421  | 1.014 | 1.532 | 1.523 | 1.006 | Disease | 0.577 | 0.666 | None |
| PGS004000 | Stroke                                          | 0.137  | 0.158  | 0.866 | 1.147 | 1.171 | 0.979 | Disease | 0.210 | 0.291 | None |
| PGS004002 | ligh-Density Lipoprotein Cholesterol Measuremer | 0.336  | 0.270  | 1.248 | NA    | NA    | NA    | QT      | 0.000 | 0.000 | F    |
| PGS004003 | HbA1c Measurement                               | 0.118  | 0.136  | 0.865 | NA    | NA    | NA    | QT      | 0.000 | 0.000 | M    |
| PGS004004 | Chronic Kidney Disease                          | 0.324  | 0.232  | 1.395 | 1.382 | 1.261 | 1.096 | Disease | 0.000 | 0.000 | F    |
| PGS004005 | Glomerular Filtration Rate                      | -0.172 | -0.197 | 0.873 | NA    | NA    | NA    | QT      | 0.000 | 0.000 | M    |
| PGS004006 | Gout                                            | 0.510  | 0.609  | 0.837 | 1.665 | 1.839 | 0.905 | Disease | 0.000 | 0.000 | M    |
| PGS004007 | Urate Measurement                               | 0.272  | 0.244  | 1.115 | NA    | NA    | NA    | QT      | 0.000 | 0.000 | F    |
| PGS004008 | Alzheimer's Disease                             | 0.749  | 0.629  | 1.191 | 2.114 | 1.875 | 1.127 | Disease | 0.000 | 0.000 | F    |
| PGS004009 | Type 1 Diabetes Mellitus                        | 0.522  | 0.410  | 1.272 | 1.685 | 1.507 | 1.118 | Disease | 0.000 | 0.000 | F    |
| PGS004010 | Rheumatoid Arthritis                            | 0.205  | 0.229  | 0.895 | 1.227 | 1.257 | 0.976 | Disease | 0.209 | 0.290 | None |
| PGS004011 | Body Height                                     | 0.409  | 0.446  | 0.918 | NA    | NA    | NA    | QT      | 0.000 | 0.000 | M    |
| PGS004012 | Body Mass Index                                 | 0.317  | 0.276  | 1.151 | NA    | NA    | NA    | QT      | 0.000 | 0.000 | F    |
| PGS004013 | Inflammatory Bowel Disease                      | 0.601  | 0.590  | 1.019 | 1.825 | 1.804 | 1.011 | Disease | 0.604 | 0.691 | None |
| PGS004014 | Type 2 Diabetes Mellitus                        | 0.460  | 0.442  | 1.041 | 1.584 | 1.556 | 1.018 | Disease | 0.092 | 0.141 | None |
| PGS004015 | Stroke                                          | 0.175  | 0.174  | 1.006 | 1.191 | 1.189 | 1.001 | Disease | 0.948 | 0.966 | None |
| PGS004016 | Chronic Kidney Disease                          | 0.341  | 0.240  | 1.423 | 1.406 | 1.271 | 1.107 | Disease | 0.000 | 0.000 | F    |

|           |                                                 |        |        |       |       |       |       |         |       |       |      |
|-----------|-------------------------------------------------|--------|--------|-------|-------|-------|-------|---------|-------|-------|------|
| PGS004017 | Glomerular Filtration Rate                      | -0.178 | -0.205 | 0.869 | NA    | NA    | NA    | QT      | 0.000 | 0.000 | M    |
| PGS004018 | Gout                                            | 0.534  | 0.638  | 0.837 | 1.705 | 1.892 | 0.901 | Disease | 0.000 | 0.000 | M    |
| PGS004019 | Urate Measurement                               | 0.282  | 0.255  | 1.103 | NA    | NA    | NA    | QT      | 0.000 | 0.000 | F    |
| PGS004020 | Type 1 Diabetes Mellitus                        | 0.525  | 0.414  | 1.267 | 1.690 | 1.513 | 1.117 | Disease | 0.000 | 0.000 | F    |
| PGS004021 | Rheumatoid Arthritis                            | 0.347  | 0.337  | 1.027 | 1.414 | 1.401 | 1.009 | Disease | 0.661 | 0.741 | None |
| PGS004022 | Body Mass Index                                 | 0.247  | 0.217  | 1.138 | NA    | NA    | NA    | QT      | 0.000 | 0.000 | F    |
| PGS004023 | Inflammatory Bowel Disease                      | 0.633  | 0.621  | 1.020 | 1.884 | 1.861 | 1.012 | Disease | 0.579 | 0.668 | None |
| PGS004024 | Type 2 Diabetes Mellitus                        | 0.482  | 0.471  | 1.023 | 1.619 | 1.601 | 1.011 | Disease | 0.307 | 0.401 | None |
| PGS004026 | Stroke                                          | 0.192  | 0.188  | 1.022 | 1.212 | 1.207 | 1.004 | Disease | 0.804 | 0.853 | None |
| PGS004028 | ligh-Density Lipoprotein Cholesterol Measuremer | 0.323  | 0.256  | 1.261 | NA    | NA    | NA    | QT      | 0.000 | 0.000 | F    |
| PGS004029 | HbA1c Measurement                               | 0.116  | 0.139  | 0.833 | NA    | NA    | NA    | QT      | 0.000 | 0.000 | M    |
| PGS004030 | Chronic Kidney Disease                          | 0.354  | 0.249  | 1.421 | 1.425 | 1.283 | 1.111 | Disease | 0.000 | 0.000 | F    |
| PGS004031 | Glomerular Filtration Rate                      | -0.188 | -0.217 | 0.866 | NA    | NA    | NA    | QT      | 0.000 | 0.000 | M    |
| PGS004032 | Gout                                            | 0.485  | 0.615  | 0.788 | 1.624 | 1.850 | 0.878 | Disease | 0.000 | 0.000 | M    |
| PGS004033 | Urate Measurement                               | 0.271  | 0.247  | 1.099 | NA    | NA    | NA    | QT      | 0.000 | 0.000 | F    |
| PGS004034 | Alzheimer's Disease                             | 0.795  | 0.648  | 1.228 | 2.214 | 1.911 | 1.159 | Disease | 0.000 | 0.000 | F    |
| PGS004035 | Type 1 Diabetes Mellitus                        | 0.583  | 0.480  | 1.215 | 1.791 | 1.615 | 1.109 | Disease | 0.000 | 0.001 | F    |
| PGS004036 | Body Height                                     | 0.442  | 0.480  | 0.919 | NA    | NA    | NA    | QT      | 0.000 | 0.000 | M    |
| PGS004037 | Body Mass Index                                 | 0.314  | 0.272  | 1.154 | NA    | NA    | NA    | QT      | 0.000 | 0.000 | F    |
| PGS004038 | Inflammatory Bowel Disease                      | 0.641  | 0.625  | 1.024 | 1.898 | 1.869 | 1.015 | Disease | 0.491 | 0.588 | None |
| PGS004039 | Type 2 Diabetes Mellitus                        | 0.503  | 0.490  | 1.027 | 1.654 | 1.633 | 1.013 | Disease | 0.221 | 0.304 | None |
| PGS004041 | Stroke                                          | 0.189  | 0.200  | 0.946 | 1.208 | 1.221 | 0.989 | Disease | 0.524 | 0.617 | None |
| PGS004043 | ligh-Density Lipoprotein Cholesterol Measuremer | 0.357  | 0.284  | 1.259 | NA    | NA    | NA    | QT      | 0.000 | 0.000 | F    |
| PGS004044 | HbA1c Measurement                               | 0.169  | 0.201  | 0.838 | NA    | NA    | NA    | QT      | 0.000 | 0.000 | M    |
| PGS004045 | Chronic Kidney Disease                          | 0.356  | 0.252  | 1.414 | 1.428 | 1.287 | 1.110 | Disease | 0.000 | 0.000 | F    |
| PGS004046 | Glomerular Filtration Rate                      | -0.190 | -0.220 | 0.861 | NA    | NA    | NA    | QT      | 0.000 | 0.000 | M    |
| PGS004047 | Gout                                            | 0.561  | 0.677  | 0.829 | 1.753 | 1.967 | 0.891 | Disease | 0.000 | 0.000 | M    |
| PGS004048 | Urate Measurement                               | 0.292  | 0.269  | 1.085 | NA    | NA    | NA    | QT      | 0.000 | 0.000 | F    |
| PGS004049 | Rheumatoid Arthritis                            | 0.378  | 0.379  | 0.998 | 1.460 | 1.461 | 0.999 | Disease | 0.972 | 0.981 | None |
| PGS004050 | Body Mass Index                                 | 0.249  | 0.218  | 1.140 | NA    | NA    | NA    | QT      | 0.000 | 0.000 | F    |
| PGS004051 | Inflammatory Bowel Disease                      | 0.628  | 0.626  | 1.002 | 1.873 | 1.871 | 1.001 | Disease | 0.950 | 0.967 | None |
| PGS004052 | Type 2 Diabetes Mellitus                        | 0.513  | 0.494  | 1.039 | 1.671 | 1.639 | 1.019 | Disease | 0.074 | 0.116 | None |
| PGS004054 | Stroke                                          | 0.189  | 0.200  | 0.946 | 1.208 | 1.221 | 0.989 | Disease | 0.520 | 0.615 | None |
| PGS004056 | ligh-Density Lipoprotein Cholesterol Measuremer | 0.330  | 0.264  | 1.250 | NA    | NA    | NA    | QT      | 0.000 | 0.000 | F    |
| PGS004057 | HbA1c Measurement                               | 0.168  | 0.199  | 0.847 | NA    | NA    | NA    | QT      | 0.000 | 0.000 | M    |
| PGS004058 | Chronic Kidney Disease                          | 0.355  | 0.251  | 1.412 | 1.426 | 1.286 | 1.109 | Disease | 0.000 | 0.000 | F    |
| PGS004059 | Glomerular Filtration Rate                      | -0.189 | -0.218 | 0.864 | NA    | NA    | NA    | QT      | 0.000 | 0.000 | M    |
| PGS004060 | Gout                                            | 0.526  | 0.649  | 0.811 | 1.692 | 1.913 | 0.884 | Disease | 0.000 | 0.000 | M    |
| PGS004061 | Urate Measurement                               | 0.268  | 0.257  | 1.042 | NA    | NA    | NA    | QT      | 0.000 | 0.000 | F    |
| PGS004062 | Alzheimer's Disease                             | 0.780  | 0.692  | 1.128 | 2.182 | 1.997 | 1.093 | Disease | 0.005 | 0.008 | F    |
| PGS004063 | Type 1 Diabetes Mellitus                        | 0.525  | 0.429  | 1.225 | 1.691 | 1.535 | 1.101 | Disease | 0.000 | 0.001 | F    |
| PGS004064 | Rheumatoid Arthritis                            | 0.377  | 0.354  | 1.063 | 1.457 | 1.425 | 1.023 | Disease | 0.299 | 0.393 | None |
| PGS004065 | Body Height                                     | 0.387  | 0.420  | 0.920 | NA    | NA    | NA    | QT      | 0.000 | 0.000 | M    |
| PGS004066 | Body Mass Index                                 | 0.316  | 0.274  | 1.154 | NA    | NA    | NA    | QT      | 0.000 | 0.000 | F    |
| PGS004067 | Inflammatory Bowel Disease                      | 0.647  | 0.627  | 1.032 | 1.910 | 1.873 | 1.020 | Disease | 0.368 | 0.468 | None |
| PGS004068 | Type 2 Diabetes Mellitus                        | 0.514  | 0.497  | 1.034 | 1.671 | 1.643 | 1.017 | Disease | 0.113 | 0.169 | None |
| PGS004070 | Stroke                                          | 0.192  | 0.201  | 0.956 | 1.212 | 1.222 | 0.991 | Disease | 0.598 | 0.686 | None |
| PGS004072 | ligh-Density Lipoprotein Cholesterol Measuremer | 0.343  | 0.273  | 1.255 | NA    | NA    | NA    | QT      | 0.000 | 0.000 | F    |
| PGS004073 | HbA1c Measurement                               | 0.170  | 0.201  | 0.845 | NA    | NA    | NA    | QT      | 0.000 | 0.000 | M    |
| PGS004074 | Chronic Kidney Disease                          | 0.360  | 0.255  | 1.408 | 1.433 | 1.291 | 1.110 | Disease | 0.000 | 0.000 | F    |
| PGS004075 | Glomerular Filtration Rate                      | -0.191 | -0.220 | 0.868 | NA    | NA    | NA    | QT      | 0.000 | 0.000 | M    |
| PGS004076 | Gout                                            | 0.565  | 0.674  | 0.839 | 1.760 | 1.962 | 0.897 | Disease | 0.000 | 0.000 | M    |
| PGS004077 | Urate Measurement                               | 0.285  | 0.266  | 1.070 | NA    | NA    | NA    | QT      | 0.000 | 0.000 | F    |
| PGS004078 | Type 1 Diabetes Mellitus                        | 0.574  | 0.457  | 1.257 | 1.775 | 1.579 | 1.124 | Disease | 0.000 | 0.000 | F    |
| PGS004079 | Rheumatoid Arthritis                            | 0.365  | 0.350  | 1.043 | 1.440 | 1.419 | 1.015 | Disease | 0.466 | 0.565 | None |
| PGS004080 | Body Mass Index                                 | 0.298  | 0.262  | 1.137 | NA    | NA    | NA    | QT      | 0.000 | 0.000 | F    |

|           |                                                 |        |        |       |       |       |       |         |       |       |      |
|-----------|-------------------------------------------------|--------|--------|-------|-------|-------|-------|---------|-------|-------|------|
| PGS004081 | Inflammatory Bowel Disease                      | 0.600  | 0.575  | 1.043 | 1.823 | 1.778 | 1.025 | Disease | 0.253 | 0.343 | None |
| PGS004082 | Type 2 Diabetes Mellitus                        | 0.479  | 0.471  | 1.018 | 1.615 | 1.601 | 1.009 | Disease | 0.421 | 0.523 | None |
| PGS004084 | Stroke                                          | 0.189  | 0.173  | 1.093 | 1.208 | 1.189 | 1.016 | Disease | 0.338 | 0.436 | None |
| PGS004086 | High-Density Lipoprotein Cholesterol Measuremer | 0.344  | 0.276  | 1.248 | NA    | NA    | NA    | QT      | 0.000 | 0.000 | F    |
| PGS004087 | HbA1c Measurement                               | 0.158  | 0.189  | 0.835 | NA    | NA    | NA    | QT      | 0.000 | 0.000 | M    |
| PGS004088 | Chronic Kidney Disease                          | 0.341  | 0.241  | 1.412 | 1.406 | 1.273 | 1.104 | Disease | 0.000 | 0.000 | F    |
| PGS004089 | Glomerular Filtration Rate                      | -0.181 | -0.209 | 0.863 | NA    | NA    | NA    | QT      | 0.000 | 0.000 | M    |
| PGS004090 | Gout                                            | 0.519  | 0.629  | 0.825 | 1.680 | 1.875 | 0.896 | Disease | 0.000 | 0.000 | M    |
| PGS004091 | Urate Measurement                               | 0.274  | 0.254  | 1.079 | NA    | NA    | NA    | QT      | 0.000 | 0.000 | F    |
| PGS004092 | Alzheimer's Disease                             | 0.806  | 0.717  | 1.124 | 2.239 | 2.049 | 1.093 | Disease | 0.005 | 0.010 | F    |
| PGS004093 | Type 1 Diabetes Mellitus                        | 0.527  | 0.422  | 1.248 | 1.694 | 1.526 | 1.110 | Disease | 0.000 | 0.000 | F    |
| PGS004094 | Rheumatoid Arthritis                            | 0.286  | 0.298  | 0.959 | 1.331 | 1.348 | 0.988 | Disease | 0.557 | 0.648 | None |
| PGS004095 | Body Height                                     | 0.403  | 0.439  | 0.919 | NA    | NA    | NA    | QT      | 0.000 | 0.000 | M    |
| PGS004096 | Body Mass Index                                 | 0.311  | 0.269  | 1.153 | NA    | NA    | NA    | QT      | 0.000 | 0.000 | F    |
| PGS004097 | Inflammatory Bowel Disease                      | 0.603  | 0.582  | 1.036 | 1.827 | 1.790 | 1.021 | Disease | 0.340 | 0.437 | None |
| PGS004098 | Stroke                                          | 0.189  | 0.171  | 1.106 | 1.208 | 1.186 | 1.018 | Disease | 0.282 | 0.376 | None |
| PGS004100 | High-Density Lipoprotein Cholesterol Measuremer | 0.347  | 0.278  | 1.249 | NA    | NA    | NA    | QT      | 0.000 | 0.000 | F    |
| PGS004101 | Chronic Kidney Disease                          | 0.336  | 0.241  | 1.391 | 1.399 | 1.273 | 1.099 | Disease | 0.000 | 0.000 | F    |
| PGS004102 | Type 1 Diabetes Mellitus                        | 0.536  | 0.432  | 1.240 | 1.709 | 1.541 | 1.109 | Disease | 0.000 | 0.000 | F    |
| PGS004103 | Rheumatoid Arthritis                            | 0.300  | 0.299  | 1.003 | 1.350 | 1.349 | 1.001 | Disease | 0.962 | 0.974 | None |
| PGS004104 | Body Mass Index                                 | 0.131  | 0.117  | 1.119 | NA    | NA    | NA    | QT      | 0.000 | 0.000 | F    |
| PGS004105 | Inflammatory Bowel Disease                      | 0.435  | 0.434  | 1.002 | 1.545 | 1.543 | 1.001 | Disease | 0.973 | 0.982 | None |
| PGS004106 | Type 2 Diabetes Mellitus                        | 0.295  | 0.293  | 1.007 | 1.343 | 1.341 | 1.002 | Disease | 0.840 | 0.881 | None |
| PGS004108 | Stroke                                          | 0.055  | 0.108  | 0.510 | 1.057 | 1.114 | 0.948 | Disease | 0.002 | 0.003 | M    |
| PGS004110 | High-Density Lipoprotein Cholesterol Measuremer | 0.243  | 0.201  | 1.212 | NA    | NA    | NA    | QT      | 0.000 | 0.000 | F    |
| PGS004111 | HbA1c Measurement                               | 0.118  | 0.137  | 0.857 | NA    | NA    | NA    | QT      | 0.000 | 0.000 | M    |
| PGS004112 | Chronic Kidney Disease                          | 0.212  | 0.155  | 1.368 | 1.236 | 1.168 | 1.059 | Disease | 0.000 | 0.000 | F    |
| PGS004113 | Glomerular Filtration Rate                      | -0.122 | -0.144 | 0.851 | NA    | NA    | NA    | QT      | 0.000 | 0.000 | M    |
| PGS004114 | Gout                                            | 0.379  | 0.448  | 0.844 | 1.460 | 1.566 | 0.933 | Disease | 0.007 | 0.012 | M    |
| PGS004115 | Urate Measurement                               | 0.210  | 0.188  | 1.119 | NA    | NA    | NA    | QT      | 0.000 | 0.000 | F    |
| PGS004116 | Alzheimer's Disease                             | 0.586  | 0.488  | 1.200 | 1.796 | 1.629 | 1.103 | Disease | 0.008 | 0.014 | F    |
| PGS004117 | Type 1 Diabetes Mellitus                        | 0.354  | 0.286  | 1.238 | 1.424 | 1.331 | 1.070 | Disease | 0.017 | 0.029 | F    |
| PGS004118 | Rheumatoid Arthritis                            | 0.252  | 0.232  | 1.086 | 1.286 | 1.261 | 1.020 | Disease | 0.343 | 0.441 | None |
| PGS004119 | Body Height                                     | 0.312  | 0.337  | 0.925 | NA    | NA    | NA    | QT      | 0.000 | 0.000 | M    |
| PGS004120 | Body Mass Index                                 | 0.259  | 0.224  | 1.155 | NA    | NA    | NA    | QT      | 0.000 | 0.000 | F    |
| PGS004121 | Inflammatory Bowel Disease                      | 0.486  | 0.478  | 1.015 | 1.625 | 1.613 | 1.007 | Disease | 0.743 | 0.805 | None |
| PGS004122 | Type 2 Diabetes Mellitus                        | 0.354  | 0.340  | 1.041 | 1.424 | 1.404 | 1.014 | Disease | 0.183 | 0.259 | None |
| PGS004124 | Stroke                                          | 0.131  | 0.124  | 1.061 | 1.141 | 1.132 | 1.008 | Disease | 0.655 | 0.736 | None |
| PGS004126 | High-Density Lipoprotein Cholesterol Measuremer | 0.258  | 0.211  | 1.226 | NA    | NA    | NA    | QT      | 0.000 | 0.000 | F    |
| PGS004127 | HbA1c Measurement                               | 0.130  | 0.154  | 0.841 | NA    | NA    | NA    | QT      | 0.000 | 0.000 | M    |
| PGS004128 | Chronic Kidney Disease                          | 0.287  | 0.195  | 1.469 | 1.332 | 1.216 | 1.096 | Disease | 0.000 | 0.000 | F    |
| PGS004129 | Glomerular Filtration Rate                      | -0.151 | -0.174 | 0.867 | NA    | NA    | NA    | QT      | 0.000 | 0.000 | M    |
| PGS004130 | Gout                                            | 0.441  | 0.524  | 0.841 | 1.554 | 1.689 | 0.920 | Disease | 0.001 | 0.002 | M    |
| PGS004131 | Urate Measurement                               | 0.224  | 0.215  | 1.042 | NA    | NA    | NA    | QT      | 0.000 | 0.000 | F    |
| PGS004132 | Type 1 Diabetes Mellitus                        | 0.356  | 0.287  | 1.241 | 1.428 | 1.333 | 1.072 | Disease | 0.016 | 0.027 | F    |
| PGS004133 | Rheumatoid Arthritis                            | 0.261  | 0.234  | 1.117 | 1.298 | 1.263 | 1.028 | Disease | 0.200 | 0.280 | None |
| PGS004134 | Body Mass Index                                 | 0.257  | 0.224  | 1.147 | NA    | NA    | NA    | QT      | 0.000 | 0.000 | F    |
| PGS004135 | Inflammatory Bowel Disease                      | 0.607  | 0.583  | 1.042 | 1.836 | 1.791 | 1.025 | Disease | 0.263 | 0.354 | None |
| PGS004136 | Type 2 Diabetes Mellitus                        | 0.482  | 0.471  | 1.024 | 1.620 | 1.602 | 1.012 | Disease | 0.283 | 0.376 | None |
| PGS004138 | Stroke                                          | 0.159  | 0.163  | 0.974 | 1.172 | 1.177 | 0.996 | Disease | 0.801 | 0.851 | None |
| PGS004140 | High-Density Lipoprotein Cholesterol Measuremer | 0.346  | 0.275  | 1.259 | NA    | NA    | NA    | QT      | 0.000 | 0.000 | F    |
| PGS004141 | HbA1c Measurement                               | 0.159  | 0.192  | 0.826 | NA    | NA    | NA    | QT      | 0.000 | 0.000 | M    |
| PGS004142 | Chronic Kidney Disease                          | 0.346  | 0.249  | 1.391 | 1.414 | 1.283 | 1.102 | Disease | 0.000 | 0.000 | F    |
| PGS004143 | Glomerular Filtration Rate                      | -0.185 | -0.215 | 0.860 | NA    | NA    | NA    | QT      | 0.000 | 0.000 | M    |
| PGS004144 | Gout                                            | 0.390  | 0.494  | 0.788 | 1.476 | 1.639 | 0.901 | Disease | 0.000 | 0.000 | M    |
| PGS004145 | Urate Measurement                               | 0.234  | 0.202  | 1.159 | NA    | NA    | NA    | QT      | 0.000 | 0.000 | F    |

|           |                                                  |        |        |       |       |       |       |         |       |       |      |
|-----------|--------------------------------------------------|--------|--------|-------|-------|-------|-------|---------|-------|-------|------|
| PGS004146 | Alzheimer's Disease                              | 0.806  | 0.677  | 1.191 | 2.239 | 1.968 | 1.138 | Disease | 0.000 | 0.000 | F    |
| PGS004147 | Type 1 Diabetes Mellitus                         | 0.357  | 0.312  | 1.146 | 1.430 | 1.366 | 1.047 | Disease | 0.113 | 0.169 | None |
| PGS004148 | Rheumatoid Arthritis                             | 0.284  | 0.275  | 1.032 | 1.328 | 1.317 | 1.009 | Disease | 0.683 | 0.757 | None |
| PGS004149 | Body Height                                      | 0.434  | 0.472  | 0.919 | NA    | NA    | NA    | QT      | 0.000 | 0.000 | M    |
| PGS004150 | Body Mass Index                                  | 0.331  | 0.288  | 1.150 | NA    | NA    | NA    | QT      | 0.000 | 0.000 | F    |
| PGS004151 | Inflammatory Bowel Disease                       | 0.668  | 0.655  | 1.019 | 1.950 | 1.925 | 1.013 | Disease | 0.567 | 0.657 | None |
| PGS004152 | Type 2 Diabetes Mellitus                         | 0.525  | 0.509  | 1.030 | 1.690 | 1.664 | 1.016 | Disease | 0.149 | 0.217 | None |
| PGS004154 | Stroke                                           | 0.196  | 0.218  | 0.897 | 1.216 | 1.243 | 0.978 | Disease | 0.184 | 0.260 | None |
| PGS004156 | High-Density Lipoprotein Cholesterol Measurement | 0.373  | 0.297  | 1.256 | NA    | NA    | NA    | QT      | 0.000 | 0.000 | F    |
| PGS004157 | HbA1c Measurement                                | 0.182  | 0.220  | 0.828 | NA    | NA    | NA    | QT      | 0.000 | 0.000 | M    |
| PGS004158 | Chronic Kidney Disease                           | 0.372  | 0.265  | 1.402 | 1.450 | 1.303 | 1.112 | Disease | 0.000 | 0.000 | F    |
| PGS004159 | Glomerular Filtration Rate                       | -0.197 | -0.228 | 0.866 | NA    | NA    | NA    | QT      | 0.000 | 0.000 | M    |
| PGS004160 | Gout                                             | 0.572  | 0.703  | 0.813 | 1.771 | 2.021 | 0.877 | Disease | 0.000 | 0.000 | M    |
| PGS004161 | Urate Measurement                                | 0.316  | 0.280  | 1.127 | NA    | NA    | NA    | QT      | 0.000 | 0.000 | F    |
| PGS004162 | Type 1 Diabetes Mellitus                         | 0.647  | 0.521  | 1.244 | 1.911 | 1.683 | 1.135 | Disease | 0.000 | 0.000 | F    |
| PGS004163 | Rheumatoid Arthritis                             | 0.432  | 0.412  | 1.048 | 1.540 | 1.510 | 1.020 | Disease | 0.347 | 0.445 | None |
| PGS004165 | Lung Carcinoma                                   | 0.110  | 0.050  | 2.198 | 1.116 | 1.051 | 1.062 | Disease | 0.016 | 0.028 | F    |
| PGS004171 | Type 1 Diabetes Mellitus                         | 0.632  | 0.563  | 1.123 | 1.882 | 1.756 | 1.072 | Disease | 0.002 | 0.003 | F    |
| PGS004172 | Type 1 Diabetes Mellitus                         | 0.525  | 0.437  | 1.200 | 1.690 | 1.549 | 1.091 | Disease | 0.000 | 0.000 | F    |
| PGS004173 | Type 1 Diabetes Mellitus                         | 0.506  | 0.461  | 1.099 | 1.659 | 1.585 | 1.046 | Disease | 0.034 | 0.055 | F    |
| PGS004174 | Type 1 Diabetes Mellitus                         | 0.446  | 0.406  | 1.100 | 1.563 | 1.500 | 1.042 | Disease | 0.055 | 0.087 | None |
| PGS004175 | Type 1 Diabetes Mellitus                         | 0.527  | 0.471  | 1.118 | 1.694 | 1.602 | 1.057 | Disease | 0.010 | 0.018 | F    |
| PGS004176 | Asthma                                           | 0.545  | 0.618  | 0.883 | 1.725 | 1.855 | 0.930 | Disease | 0.000 | 0.000 | M    |
| PGS004177 | Asthma                                           | 0.591  | 0.659  | 0.897 | 1.806 | 1.932 | 0.935 | Disease | 0.000 | 0.000 | M    |
| PGS004178 | Asthma                                           | 0.544  | 0.611  | 0.890 | 1.723 | 1.843 | 0.935 | Disease | 0.000 | 0.000 | M    |
| PGS004179 | Asthma                                           | 0.510  | 0.580  | 0.878 | 1.665 | 1.786 | 0.932 | Disease | 0.000 | 0.000 | M    |
| PGS004180 | Asthma                                           | 0.504  | 0.572  | 0.882 | 1.656 | 1.772 | 0.935 | Disease | 0.000 | 0.000 | M    |
| PGS004181 | Type 2 Diabetes Mellitus                         | 0.928  | 0.969  | 0.958 | 2.530 | 2.635 | 0.960 | Disease | 0.000 | 0.001 | M    |
| PGS004182 | Type 2 Diabetes Mellitus                         | 0.945  | 0.989  | 0.955 | 2.572 | 2.689 | 0.956 | Disease | 0.000 | 0.000 | M    |
| PGS004183 | Type 2 Diabetes Mellitus                         | 0.856  | 0.892  | 0.959 | 2.353 | 2.440 | 0.964 | Disease | 0.001 | 0.002 | M    |
| PGS004184 | Type 2 Diabetes Mellitus                         | 0.904  | 0.960  | 0.941 | 2.469 | 2.613 | 0.945 | Disease | 0.000 | 0.000 | M    |
| PGS004185 | Type 2 Diabetes Mellitus                         | 0.666  | 0.690  | 0.965 | 1.946 | 1.993 | 0.976 | Disease | 0.025 | 0.042 | M    |
| PGS004186 | Atrial Fibrillation                              | 0.585  | 0.647  | 0.904 | 1.795 | 1.910 | 0.940 | Disease | 0.000 | 0.000 | M    |
| PGS004187 | Atrial Fibrillation                              | 0.681  | 0.745  | 0.914 | 1.975 | 2.106 | 0.938 | Disease | 0.000 | 0.000 | M    |
| PGS004188 | Atrial Fibrillation                              | 0.546  | 0.610  | 0.895 | 1.726 | 1.841 | 0.938 | Disease | 0.000 | 0.000 | M    |
| PGS004189 | Atrial Fibrillation                              | 0.597  | 0.665  | 0.898 | 1.817 | 1.945 | 0.934 | Disease | 0.000 | 0.000 | M    |
| PGS004190 | Atrial Fibrillation                              | 0.522  | 0.584  | 0.894 | 1.686 | 1.794 | 0.940 | Disease | 0.000 | 0.000 | M    |
| PGS004191 | Hypertension                                     | 0.682  | 0.608  | 1.122 | 1.977 | 1.836 | 1.077 | Disease | 0.000 | 0.000 | F    |
| PGS004192 | Hypertension                                     | 0.561  | 0.496  | 1.130 | 1.752 | 1.643 | 1.067 | Disease | 0.000 | 0.000 | F    |
| PGS004193 | Hypertension                                     | 0.651  | 0.580  | 1.123 | 1.918 | 1.787 | 1.074 | Disease | 0.000 | 0.000 | F    |
| PGS004194 | Hypertension                                     | 0.623  | 0.549  | 1.134 | 1.865 | 1.732 | 1.076 | Disease | 0.000 | 0.000 | F    |
| PGS004195 | Hypertension                                     | 0.439  | 0.388  | 1.129 | 1.551 | 1.475 | 1.052 | Disease | 0.000 | 0.000 | F    |
| PGS004196 | Coronary Artery Disease                          | 0.410  | 0.592  | 0.693 | 1.507 | 1.807 | 0.834 | Disease | 0.000 | 0.000 | M    |
| PGS004197 | Coronary Artery Disease                          | 0.551  | 0.795  | 0.694 | 1.736 | 2.213 | 0.784 | Disease | 0.000 | 0.000 | M    |
| PGS004198 | Coronary Artery Disease                          | 0.452  | 0.656  | 0.690 | 1.572 | 1.926 | 0.816 | Disease | 0.000 | 0.000 | M    |
| PGS004199 | Coronary Artery Disease                          | 0.465  | 0.668  | 0.696 | 1.591 | 1.950 | 0.816 | Disease | 0.000 | 0.000 | M    |
| PGS004200 | Coronary Artery Disease                          | 0.509  | 0.732  | 0.695 | 1.664 | 2.079 | 0.800 | Disease | 0.000 | 0.000 | M    |
| PGS004201 | Lipoprotein(a) Measurement                       | 0.753  | 0.756  | 0.996 | NA    | NA    | NA    | QT      | 0.137 | 0.200 | None |
| PGS004202 | Lipoprotein(a) Measurement                       | 0.751  | 0.754  | 0.996 | NA    | NA    | NA    | QT      | 0.157 | 0.226 | None |
| PGS004203 | Lipoprotein(a) Measurement                       | 0.748  | 0.751  | 0.996 | NA    | NA    | NA    | QT      | 0.146 | 0.212 | None |
| PGS004204 | Lipoprotein(a) Measurement                       | 0.748  | 0.751  | 0.996 | NA    | NA    | NA    | QT      | 0.143 | 0.209 | None |
| PGS004205 | Lipoprotein(a) Measurement                       | 0.751  | 0.754  | 0.996 | NA    | NA    | NA    | QT      | 0.166 | 0.237 | None |
| PGS004206 | Bilirubin Measurement                            | 0.421  | 0.548  | 0.768 | NA    | NA    | NA    | QT      | 0.000 | 0.000 | M    |
| PGS004207 | Bilirubin Measurement                            | 0.425  | 0.555  | 0.767 | NA    | NA    | NA    | QT      | 0.000 | 0.000 | M    |
| PGS004208 | Bilirubin Measurement                            | 0.421  | 0.549  | 0.768 | NA    | NA    | NA    | QT      | 0.000 | 0.000 | M    |
| PGS004209 | Bilirubin Measurement                            | 0.407  | 0.527  | 0.772 | NA    | NA    | NA    | QT      | 0.000 | 0.000 | M    |

|           |                            |        |        |       |       |       |       |         |       |       |      |
|-----------|----------------------------|--------|--------|-------|-------|-------|-------|---------|-------|-------|------|
| PGS004210 | Bilirubin Measurement      | 0.418  | 0.543  | 0.769 | NA    | NA    | NA    | QT      | 0.000 | 0.000 | M    |
| PGS004211 | Body Height                | 0.446  | 0.486  | 0.917 | NA    | NA    | NA    | QT      | 0.000 | 0.000 | M    |
| PGS004212 | Body Height                | 0.453  | 0.494  | 0.916 | NA    | NA    | NA    | QT      | 0.000 | 0.000 | M    |
| PGS004213 | Body Height                | 0.446  | 0.486  | 0.917 | NA    | NA    | NA    | QT      | 0.000 | 0.000 | M    |
| PGS004214 | Body Height                | 0.449  | 0.490  | 0.917 | NA    | NA    | NA    | QT      | 0.000 | 0.000 | M    |
| PGS004215 | Body Height                | 0.448  | 0.488  | 0.917 | NA    | NA    | NA    | QT      | 0.000 | 0.000 | M    |
| PGS004216 | Body Mass Index            | 0.548  | 0.458  | 1.196 | NA    | NA    | NA    | QT      | 0.000 | 0.000 | F    |
| PGS004217 | Body Mass Index            | 0.552  | 0.462  | 1.196 | NA    | NA    | NA    | QT      | 0.000 | 0.000 | F    |
| PGS004218 | Body Mass Index            | 0.534  | 0.447  | 1.195 | NA    | NA    | NA    | QT      | 0.000 | 0.000 | F    |
| PGS004219 | Body Mass Index            | 0.560  | 0.468  | 1.197 | NA    | NA    | NA    | QT      | 0.000 | 0.000 | F    |
| PGS004220 | Body Mass Index            | 0.547  | 0.457  | 1.196 | NA    | NA    | NA    | QT      | 0.000 | 0.000 | F    |
| PGS004222 | Gout                       | 0.245  | 0.334  | 0.733 | 1.278 | 1.397 | 0.915 | Disease | 0.000 | 0.000 | M    |
| PGS004223 | Type 2 Diabetes Mellitus   | 0.427  | 0.424  | 1.006 | 1.532 | 1.528 | 1.002 | Disease | 0.814 | 0.861 | None |
| PGS004224 | Chronic Kidney Disease     | 0.246  | 0.195  | 1.262 | 1.279 | 1.215 | 1.052 | Disease | 0.000 | 0.000 | F    |
| PGS004225 | Type 2 Diabetes Mellitus   | 0.192  | 0.182  | 1.054 | 1.211 | 1.200 | 1.010 | Disease | 0.347 | 0.445 | None |
| PGS004226 | Type 2 Diabetes Mellitus   | 0.311  | 0.304  | 1.021 | 1.364 | 1.356 | 1.006 | Disease | 0.548 | 0.640 | None |
| PGS004227 | Alzheimer's Disease        | 0.759  | 0.626  | 1.213 | 2.136 | 1.870 | 1.143 | Disease | 0.000 | 0.000 | F    |
| PGS004228 | Alzheimer's Disease        | 0.359  | 0.336  | 1.069 | 1.431 | 1.399 | 1.023 | Disease | 0.514 | 0.610 | None |
| PGS004229 | Alzheimer's Disease        | 0.122  | 0.141  | 0.867 | 1.130 | 1.152 | 0.981 | Disease | 0.596 | 0.684 | None |
| PGS004231 | Systolic Blood Pressure    | 0.180  | 0.143  | 1.262 | NA    | NA    | NA    | QT      | 0.000 | 0.000 | F    |
| PGS004232 | Diastolic Blood Pressure   | 0.166  | 0.146  | 1.141 | NA    | NA    | NA    | QT      | 0.000 | 0.000 | F    |
| PGS004233 | Diastolic Blood Pressure   | 0.123  | 0.113  | 1.084 | NA    | NA    | NA    | QT      | 0.001 | 0.002 | F    |
| PGS004234 | Hypertension               | 0.863  | 0.790  | 1.092 | 2.371 | 2.204 | 1.076 | Disease | 0.000 | 0.000 | F    |
| PGS004235 | Systolic Blood Pressure    | 0.141  | 0.116  | 1.218 | NA    | NA    | NA    | QT      | 0.000 | 0.000 | F    |
| PGS004236 | Hypertension               | 0.359  | 0.327  | 1.097 | 1.432 | 1.387 | 1.032 | Disease | 0.000 | 0.000 | F    |
| PGS004237 | Coronary Artery Disease    | -0.332 | -0.432 | 0.770 | 0.717 | 0.649 | 1.104 | Disease | 0.000 | 0.000 | M    |
| PGS004240 | Colorectal Cancer          | 0.356  | 0.391  | 0.912 | 1.428 | 1.478 | 0.966 | Disease | 0.124 | 0.184 | None |
| PGS004241 | Urinary Bladder Carcinoma  | 0.283  | 0.254  | 1.113 | 1.327 | 1.290 | 1.029 | Disease | 0.363 | 0.464 | None |
| PGS004243 | Colorectal Cancer          | 0.328  | 0.362  | 0.906 | 1.388 | 1.436 | 0.967 | Disease | 0.126 | 0.187 | None |
| PGS004245 | Renal Carcinoma            | 0.225  | 0.201  | 1.118 | 1.252 | 1.223 | 1.024 | Disease | 0.577 | 0.666 | None |
| PGS004246 | Lung Carcinoma             | 0.123  | 0.151  | 0.812 | 1.131 | 1.163 | 0.972 | Disease | 0.232 | 0.317 | None |
| PGS004247 | Melanoma                   | 0.498  | 0.516  | 0.965 | 1.646 | 1.676 | 0.982 | Disease | 0.480 | 0.578 | None |
| PGS004248 | Non-Hodgkin's Lymphoma     | 0.222  | 0.143  | 1.552 | 1.249 | 1.154 | 1.082 | Disease | 0.184 | 0.260 | None |
| PGS004250 | Pancreatic Carcinoma       | 0.354  | 0.315  | 1.123 | 1.425 | 1.371 | 1.040 | Disease | 0.393 | 0.495 | None |
| PGS004252 | Asthma                     | 0.334  | 0.398  | 0.839 | 1.396 | 1.488 | 0.938 | Disease | 0.000 | 0.000 | M    |
| PGS004253 | Ulcerative Colitis         | 0.640  | 0.661  | 0.968 | 1.896 | 1.937 | 0.979 | Disease | 0.438 | 0.539 | None |
| PGS004254 | Crohn's Disease            | 0.747  | 0.618  | 1.208 | 2.110 | 1.855 | 1.137 | Disease | 0.000 | 0.001 | F    |
| PGS004257 | Rheumatoid Arthritis       | 0.311  | 0.297  | 1.047 | 1.365 | 1.346 | 1.014 | Disease | 0.493 | 0.589 | None |
| PGS004265 | Gout                       | 0.449  | 0.526  | 0.852 | 1.566 | 1.693 | 0.925 | Disease | 0.002 | 0.003 | M    |
| PGS004266 | Gout                       | 0.500  | 0.584  | 0.856 | 1.649 | 1.794 | 0.919 | Disease | 0.001 | 0.002 | M    |
| PGS004267 | Gout                       | 0.650  | 0.730  | 0.890 | 1.916 | 2.076 | 0.923 | Disease | 0.001 | 0.003 | M    |
| PGS004268 | Gout                       | 0.437  | 0.516  | 0.848 | 1.549 | 1.675 | 0.925 | Disease | 0.002 | 0.003 | M    |
| PGS004269 | Gout                       | 0.446  | 0.526  | 0.847 | 1.562 | 1.692 | 0.923 | Disease | 0.001 | 0.002 | M    |
| PGS004270 | Inflammatory Bowel Disease | 0.221  | 0.268  | 0.825 | 1.247 | 1.307 | 0.954 | Disease | 0.030 | 0.050 | M    |
| PGS004271 | Inflammatory Bowel Disease | 0.224  | 0.276  | 0.811 | 1.251 | 1.318 | 0.949 | Disease | 0.016 | 0.028 | M    |
| PGS004274 | Inflammatory Bowel Disease | 0.277  | 0.335  | 0.827 | 1.319 | 1.398 | 0.944 | Disease | 0.008 | 0.014 | M    |
| PGS004275 | Asthma                     | 0.582  | 0.648  | 0.898 | 1.789 | 1.912 | 0.936 | Disease | 0.000 | 0.000 | M    |
| PGS004276 | Asthma                     | 0.546  | 0.618  | 0.884 | 1.726 | 1.855 | 0.931 | Disease | 0.000 | 0.000 | M    |
| PGS004277 | Asthma                     | 0.540  | 0.619  | 0.871 | 1.715 | 1.858 | 0.923 | Disease | 0.000 | 0.000 | M    |
| PGS004278 | Asthma                     | 0.544  | 0.609  | 0.893 | 1.723 | 1.838 | 0.937 | Disease | 0.000 | 0.000 | M    |
| PGS004279 | Asthma                     | 0.584  | 0.643  | 0.909 | 1.793 | 1.902 | 0.943 | Disease | 0.000 | 0.000 | M    |
| PGS004281 | Dementia                   | 0.566  | 0.453  | 1.251 | 1.761 | 1.572 | 1.120 | Disease | 0.000 | 0.000 | F    |
| PGS004282 | Dementia                   | 0.595  | 0.463  | 1.286 | 1.813 | 1.589 | 1.141 | Disease | 0.000 | 0.000 | F    |
| PGS004283 | Dementia                   | 0.579  | 0.462  | 1.254 | 1.784 | 1.587 | 1.124 | Disease | 0.000 | 0.000 | F    |
| PGS004284 | Dementia                   | 0.548  | 0.431  | 1.270 | 1.730 | 1.539 | 1.124 | Disease | 0.000 | 0.000 | F    |
| PGS004285 | Alzheimer's Disease        | 0.673  | 0.547  | 1.232 | 1.961 | 1.727 | 1.135 | Disease | 0.000 | 0.000 | F    |

|           |                                              |       |       |       |       |       |       |         |       |       |      |
|-----------|----------------------------------------------|-------|-------|-------|-------|-------|-------|---------|-------|-------|------|
| PGS004286 | Alzheimer's Disease                          | 0.637 | 0.523 | 1.219 | 1.891 | 1.686 | 1.121 | Disease | 0.000 | 0.000 | F    |
| PGS004287 | Alzheimer's Disease                          | 0.697 | 0.577 | 1.207 | 2.007 | 1.781 | 1.127 | Disease | 0.000 | 0.000 | F    |
| PGS004288 | Alzheimer's Disease                          | 0.729 | 0.615 | 1.186 | 2.074 | 1.849 | 1.121 | Disease | 0.000 | 0.000 | F    |
| PGS004289 | Alzheimer's Disease                          | 0.678 | 0.567 | 1.196 | 1.969 | 1.762 | 1.117 | Disease | 0.000 | 0.000 | F    |
| PGS004290 | Atrial Fibrillation                          | 0.625 | 0.703 | 0.888 | 1.868 | 2.020 | 0.924 | Disease | 0.000 | 0.000 | M    |
| PGS004291 | Atrial Fibrillation                          | 0.623 | 0.699 | 0.890 | 1.864 | 2.012 | 0.926 | Disease | 0.000 | 0.000 | M    |
| PGS004292 | Atrial Fibrillation                          | 0.501 | 0.560 | 0.895 | 1.650 | 1.750 | 0.943 | Disease | 0.000 | 0.000 | M    |
| PGS004293 | Atrial Fibrillation                          | 0.565 | 0.635 | 0.889 | 1.759 | 1.887 | 0.932 | Disease | 0.000 | 0.000 | M    |
| PGS004294 | Atrial Fibrillation                          | 0.591 | 0.661 | 0.893 | 1.805 | 1.937 | 0.932 | Disease | 0.000 | 0.000 | M    |
| PGS004300 | Colorectal Cancer                            | 0.285 | 0.295 | 0.965 | 1.330 | 1.344 | 0.990 | Disease | 0.634 | 0.717 | None |
| PGS004302 | Colorectal Cancer                            | 0.403 | 0.436 | 0.924 | 1.496 | 1.546 | 0.967 | Disease | 0.135 | 0.198 | None |
| PGS004303 | Colorectal Cancer                            | 0.365 | 0.400 | 0.913 | 1.441 | 1.492 | 0.966 | Disease | 0.117 | 0.175 | None |
| PGS004305 | Coronary Artery Disease                      | 0.413 | 0.542 | 0.763 | 1.512 | 1.719 | 0.879 | Disease | 0.000 | 0.000 | M    |
| PGS004306 | Coronary Artery Disease                      | 0.432 | 0.593 | 0.727 | 1.540 | 1.810 | 0.851 | Disease | 0.000 | 0.000 | M    |
| PGS004307 | Coronary Artery Disease                      | 0.437 | 0.588 | 0.744 | 1.548 | 1.800 | 0.860 | Disease | 0.000 | 0.000 | M    |
| PGS004308 | Coronary Artery Disease                      | 0.342 | 0.485 | 0.705 | 1.408 | 1.624 | 0.866 | Disease | 0.000 | 0.000 | M    |
| PGS004309 | Coronary Artery Disease                      | 0.407 | 0.552 | 0.738 | 1.503 | 1.736 | 0.865 | Disease | 0.000 | 0.000 | M    |
| PGS004310 | Type 2 Diabetes Mellitus                     | 0.856 | 0.872 | 0.981 | 2.354 | 2.393 | 0.984 | Disease | 0.153 | 0.222 | None |
| PGS004311 | Type 2 Diabetes Mellitus                     | 0.749 | 0.747 | 1.003 | 2.115 | 2.110 | 1.002 | Disease | 0.823 | 0.867 | None |
| PGS004312 | Type 2 Diabetes Mellitus                     | 0.848 | 0.875 | 0.969 | 2.335 | 2.399 | 0.973 | Disease | 0.016 | 0.028 | M    |
| PGS004313 | Type 2 Diabetes Mellitus                     | 0.885 | 0.893 | 0.991 | 2.423 | 2.443 | 0.992 | Disease | 0.478 | 0.577 | None |
| PGS004314 | Type 2 Diabetes Mellitus                     | 0.823 | 0.833 | 0.988 | 2.277 | 2.300 | 0.990 | Disease | 0.365 | 0.465 | None |
| PGS004315 | Psoriasis                                    | 0.583 | 0.637 | 0.915 | 1.792 | 1.891 | 0.948 | Disease | 0.021 | 0.036 | M    |
| PGS004316 | Psoriasis                                    | 0.416 | 0.391 | 1.065 | 1.516 | 1.478 | 1.026 | Disease | 0.207 | 0.288 | None |
| PGS004317 | Psoriasis                                    | 0.383 | 0.506 | 0.756 | 1.466 | 1.659 | 0.884 | Disease | 0.000 | 0.000 | M    |
| PGS004318 | Dementia                                     | 0.595 | 0.455 | 1.308 | 1.814 | 1.576 | 1.151 | Disease | 0.000 | 0.000 | F    |
| PGS004319 | Body Mass Index                              | 0.063 | 0.059 | 1.083 | NA    | NA    | NA    | QT      | 0.083 | 0.128 | None |
| PGS004321 | Coronary Artery Disease                      | 0.177 | 0.251 | 0.705 | 1.193 | 1.285 | 0.929 | Disease | 0.000 | 0.000 | M    |
| PGS004322 | Stroke                                       | 0.030 | 0.077 | 0.390 | 1.031 | 1.080 | 0.954 | Disease | 0.005 | 0.009 | M    |
| PGS004323 | Type 2 Diabetes Mellitus                     | 0.292 | 0.301 | 0.971 | 1.339 | 1.351 | 0.991 | Disease | 0.403 | 0.506 | None |
| PGS004325 | Lung Carcinoma                               | 0.210 | 0.185 | 1.139 | 1.234 | 1.203 | 1.026 | Disease | 0.303 | 0.396 | None |
| PGS004326 | Rheumatoid Arthritis                         | 0.280 | 0.274 | 1.022 | 1.323 | 1.315 | 1.006 | Disease | 0.758 | 0.816 | None |
| PGS004328 | Serum Albumin Measurement                    | 0.344 | 0.337 | 1.020 | NA    | NA    | NA    | QT      | 0.019 | 0.032 | F    |
| PGS004329 | Serum Alanine Aminotransferase Measurement   | 0.224 | 0.300 | 0.746 | NA    | NA    | NA    | QT      | 0.000 | 0.000 | M    |
| PGS004330 | Aspartate Aminotransferase Measurement       | 0.207 | 0.256 | 0.806 | NA    | NA    | NA    | QT      | 0.000 | 0.000 | M    |
| PGS004331 | Urea Measurement                             | 0.277 | 0.310 | 0.894 | NA    | NA    | NA    | QT      | 0.000 | 0.000 | M    |
| PGS004332 | Calcium Measurement                          | 0.340 | 0.320 | 1.061 | NA    | NA    | NA    | QT      | 0.000 | 0.000 | F    |
| PGS004333 | Total Cholesterol Measurement                | 0.286 | 0.279 | 1.026 | NA    | NA    | NA    | QT      | 0.041 | 0.066 | F    |
| PGS004334 | Creatinine Measurement                       | 0.233 | 0.272 | 0.855 | NA    | NA    | NA    | QT      | 0.000 | 0.000 | M    |
| PGS004335 | C-Reactive Protein Measurement               | 0.256 | 0.204 | 1.251 | NA    | NA    | NA    | QT      | 0.000 | 0.000 | F    |
| PGS004336 | Serum Gamma-Glutamyl Transferase Measurement | 0.213 | 0.298 | 0.715 | NA    | NA    | NA    | QT      | 0.000 | 0.000 | M    |
| PGS004337 | HbA1c Measurement                            | 0.260 | 0.342 | 0.760 | NA    | NA    | NA    | QT      | 0.000 | 0.000 | M    |
| PGS004338 | IGF-1 Measurement                            | 0.396 | 0.398 | 0.996 | NA    | NA    | NA    | QT      | 0.506 | 0.601 | None |
| PGS004339 | Phosphate Measurement                        | 0.299 | 0.343 | 0.871 | NA    | NA    | NA    | QT      | 0.000 | 0.000 | M    |
| PGS004341 | Total Blood Protein Measurement              | 0.349 | 0.354 | 0.986 | NA    | NA    | NA    | QT      | 0.082 | 0.126 | None |
| PGS004342 | Triglyceride Measurement                     | 0.302 | 0.414 | 0.729 | NA    | NA    | NA    | QT      | 0.000 | 0.000 | M    |
| PGS004343 | Urate Measurement                            | 0.371 | 0.334 | 1.112 | NA    | NA    | NA    | QT      | 0.000 | 0.000 | F    |
| PGS004344 | Vitamin D Measurement                        | 0.306 | 0.311 | 0.986 | NA    | NA    | NA    | QT      | 0.118 | 0.175 | None |
| PGS004345 | Leukocyte Count                              | 0.320 | 0.320 | 0.999 | NA    | NA    | NA    | QT      | 0.931 | 0.955 | None |
| PGS004346 | Erythrocyte Count                            | 0.328 | 0.365 | 0.899 | NA    | NA    | NA    | QT      | 0.000 | 0.000 | M    |
| PGS004349 | Mean Corpuscular Volume                      | 0.407 | 0.398 | 1.023 | NA    | NA    | NA    | QT      | 0.000 | 0.001 | F    |
| PGS004350 | Mean Corpuscular Hemoglobin Concentration    | 0.128 | 0.124 | 1.032 | NA    | NA    | NA    | QT      | 0.164 | 0.236 | None |
| PGS004351 | Red Cell Distribution Width                  | 0.339 | 0.289 | 1.173 | NA    | NA    | NA    | QT      | 0.000 | 0.000 | F    |
| PGS004352 | Platelet Count                               | 0.449 | 0.402 | 1.117 | NA    | NA    | NA    | QT      | 0.000 | 0.000 | F    |
| PGS004353 | Platelet Crit                                | 0.415 | 0.376 | 1.104 | NA    | NA    | NA    | QT      | 0.000 | 0.000 | F    |
| PGS004354 | Mean Platelet Volume                         | 0.497 | 0.486 | 1.022 | NA    | NA    | NA    | QT      | 0.000 | 0.000 | F    |

|           |                                       |        |        |       |       |       |       |         |       |       |      |
|-----------|---------------------------------------|--------|--------|-------|-------|-------|-------|---------|-------|-------|------|
| PGS004355 | Platelet Component Distribution Width | 0.392  | 0.411  | 0.953 | NA    | NA    | NA    | QT      | 0.000 | 0.000 | M    |
| PGS004356 | Lymphocyte Count                      | 0.212  | 0.208  | 1.019 | NA    | NA    | NA    | QT      | 0.171 | 0.244 | None |
| PGS004357 | Monocyte Count                        | 0.277  | 0.322  | 0.859 | NA    | NA    | NA    | QT      | 0.000 | 0.000 | M    |
| PGS004358 | Neutrophil Count                      | 0.343  | 0.349  | 0.982 | NA    | NA    | NA    | QT      | 0.024 | 0.041 | M    |
| PGS004359 | Lymphocyte Percentage of Leukocytes   | 0.347  | 0.349  | 0.995 | NA    | NA    | NA    | QT      | 0.471 | 0.570 | None |
| PGS004360 | Monocyte Percentage of Leukocytes     | 0.290  | 0.327  | 0.887 | NA    | NA    | NA    | QT      | 0.000 | 0.000 | M    |
| PGS004361 | Neutrophil Percentage of Leukocytes   | 0.335  | 0.348  | 0.964 | NA    | NA    | NA    | QT      | 0.000 | 0.000 | M    |
| PGS004362 | Eosinophil Percentage of Leukocytes   | 0.317  | 0.359  | 0.883 | NA    | NA    | NA    | QT      | 0.000 | 0.000 | M    |
| PGS004363 | Reticulocyte Measurement              | 0.234  | 0.253  | 0.924 | NA    | NA    | NA    | QT      | 0.000 | 0.000 | M    |
| PGS004364 | Reticulocyte Count                    | 0.238  | 0.260  | 0.916 | NA    | NA    | NA    | QT      | 0.000 | 0.000 | M    |
| PGS004365 | Mean Reticulocyte Volume              | 0.379  | 0.383  | 0.989 | NA    | NA    | NA    | QT      | 0.127 | 0.187 | None |
| PGS004366 | Mean Corpuscular Volume               | 0.311  | 0.307  | 1.016 | NA    | NA    | NA    | QT      | 0.069 | 0.107 | None |
| PGS004367 | Reticulocyte Measurement              | 0.114  | 0.121  | 0.948 | NA    | NA    | NA    | QT      | 0.035 | 0.057 | M    |
| PGS004368 | Reticulocyte Measurement              | 0.218  | 0.235  | 0.926 | NA    | NA    | NA    | QT      | 0.000 | 0.000 | M    |
| PGS004369 | Reticulocyte Count                    | 0.222  | 0.243  | 0.917 | NA    | NA    | NA    | QT      | 0.000 | 0.000 | M    |
| PGS004371 | Diastolic Blood Pressure              | 0.347  | 0.319  | 1.087 | NA    | NA    | NA    | QT      | 0.000 | 0.000 | F    |
| PGS004372 | Systolic Blood Pressure               | 0.343  | 0.295  | 1.165 | NA    | NA    | NA    | QT      | 0.000 | 0.000 | F    |
| PGS004373 | Body Weight                           | -0.375 | -0.378 | 0.993 | NA    | NA    | NA    | QT      | 0.256 | 0.347 | None |
| PGS004374 | Fat Body Mass                         | 0.333  | 0.271  | 1.227 | NA    | NA    | NA    | QT      | 0.000 | 0.000 | F    |
| PGS004375 | Fat Body Mass                         | 0.321  | 0.254  | 1.267 | NA    | NA    | NA    | QT      | 0.000 | 0.000 | F    |
| PGS004377 | Whole-Body Water Mass                 | 0.188  | 0.305  | 0.616 | NA    | NA    | NA    | QT      | 0.000 | 0.000 | M    |
| PGS004378 | Body Mass Index                       | 0.453  | 0.358  | 1.267 | NA    | NA    | NA    | QT      | 0.000 | 0.000 | F    |
| PGS004379 | Basal Metabolic Rate Measurement      | 0.207  | 0.337  | 0.616 | NA    | NA    | NA    | QT      | 0.000 | 0.000 | M    |
| PGS004385 | Fat Body Mass                         | 0.305  | 0.256  | 1.191 | NA    | NA    | NA    | QT      | 0.000 | 0.000 | F    |
| PGS004386 | Fat Body Mass                         | 0.306  | 0.253  | 1.206 | NA    | NA    | NA    | QT      | 0.000 | 0.000 | F    |
| PGS004389 | Fat Body Mass                         | 0.306  | 0.258  | 1.187 | NA    | NA    | NA    | QT      | 0.000 | 0.000 | F    |
| PGS004390 | Fat Body Mass                         | 0.306  | 0.253  | 1.208 | NA    | NA    | NA    | QT      | 0.000 | 0.000 | F    |
| PGS004393 | Fat Body Mass                         | 0.323  | 0.255  | 1.263 | NA    | NA    | NA    | QT      | 0.000 | 0.000 | F    |
| PGS004394 | Fat Body Mass                         | 0.318  | 0.235  | 1.353 | NA    | NA    | NA    | QT      | 0.000 | 0.000 | F    |
| PGS004397 | Fat Body Mass                         | 0.322  | 0.260  | 1.237 | NA    | NA    | NA    | QT      | 0.000 | 0.000 | F    |
| PGS004398 | Fat Body Mass                         | 0.317  | 0.236  | 1.343 | NA    | NA    | NA    | QT      | 0.000 | 0.000 | F    |
| PGS004401 | Fat Body Mass                         | 0.332  | 0.263  | 1.265 | NA    | NA    | NA    | QT      | 0.000 | 0.000 | F    |
| PGS004402 | Fat Body Mass                         | 0.321  | 0.251  | 1.278 | NA    | NA    | NA    | QT      | 0.000 | 0.000 | F    |
| PGS004405 | Waist Hip Ratio                       | 0.212  | 0.212  | 0.998 | NA    | NA    | NA    | QT      | 0.817 | 0.863 | None |
| PGS004406 | Waist Hip Ratio                       | 0.063  | 0.111  | 0.566 | NA    | NA    | NA    | QT      | 0.000 | 0.000 | M    |
| PGS004407 | Body Height                           | 0.356  | 0.388  | 0.919 | NA    | NA    | NA    | QT      | 0.000 | 0.000 | M    |
| PGS004409 | Body Mass Index                       | 0.456  | 0.360  | 1.266 | NA    | NA    | NA    | QT      | 0.000 | 0.000 | F    |
| PGS004410 | Body Weight                           | 0.377  | 0.379  | 0.992 | NA    | NA    | NA    | QT      | 0.208 | 0.289 | None |
| PGS004411 | Bone Density                          | 0.394  | 0.458  | 0.861 | NA    | NA    | NA    | QT      | 0.000 | 0.000 | M    |
| PGS004415 | Bone Density                          | 0.395  | 0.459  | 0.860 | NA    | NA    | NA    | QT      | 0.000 | 0.000 | M    |
| PGS004419 | Bone Density                          | 0.222  | 0.238  | 0.935 | NA    | NA    | NA    | QT      | 0.000 | 0.000 | M    |
| PGS004420 | Bone Density                          | 0.221  | 0.237  | 0.934 | NA    | NA    | NA    | QT      | 0.000 | 0.000 | M    |
| PGS004424 | Bone Density                          | 0.220  | 0.239  | 0.921 | NA    | NA    | NA    | QT      | 0.000 | 0.000 | M    |
| PGS004425 | Bone Density                          | 0.220  | 0.239  | 0.923 | NA    | NA    | NA    | QT      | 0.000 | 0.000 | M    |
| PGS004426 | Birth Weight                          | 0.329  | 0.357  | 0.922 | NA    | NA    | NA    | QT      | 0.000 | 0.000 | M    |
| PGS004428 | Grip Strength Measurement             | 0.173  | 0.270  | 0.640 | NA    | NA    | NA    | QT      | 0.000 | 0.000 | M    |
| PGS004429 | Grip Strength Measurement             | 0.153  | 0.237  | 0.643 | NA    | NA    | NA    | QT      | 0.000 | 0.000 | M    |
| PGS004433 | Forced Expiratory Volume              | 0.221  | 0.339  | 0.651 | NA    | NA    | NA    | QT      | 0.000 | 0.000 | M    |
| PGS004434 | Peak Expiratory Flow                  | 0.185  | 0.325  | 0.568 | NA    | NA    | NA    | QT      | 0.000 | 0.000 | M    |
| PGS004435 | Forced Expiratory Volume              | 0.208  | 0.321  | 0.647 | NA    | NA    | NA    | QT      | 0.000 | 0.000 | M    |
| PGS004437 | Forced Expiratory Volume              | 0.108  | 0.159  | 0.679 | NA    | NA    | NA    | QT      | 0.000 | 0.000 | M    |
| PGS004438 | Forced Expiratory Volume              | 0.170  | 0.235  | 0.721 | NA    | NA    | NA    | QT      | 0.000 | 0.000 | M    |
| PGS004439 | Asthma                                | 0.727  | 0.755  | 0.963 | 2.069 | 2.127 | 0.972 | Disease | 0.007 | 0.012 | M    |
| PGS004440 | Atrial Fibrillation                   | 0.721  | 0.735  | 0.981 | 2.057 | 2.086 | 0.986 | Disease | 0.211 | 0.292 | None |
| PGS004442 | Lung Carcinoma                        | 0.953  | 0.984  | 0.968 | 2.594 | 2.676 | 0.969 | Disease | 0.107 | 0.161 | None |
| PGS004443 | Coronary Artery Disease               | 0.544  | 0.706  | 0.771 | 1.723 | 2.025 | 0.851 | Disease | 0.000 | 0.000 | M    |

|           |                                       |       |       |       |       |       |       |         |       |       |      |
|-----------|---------------------------------------|-------|-------|-------|-------|-------|-------|---------|-------|-------|------|
| PGS004444 | Coronary Artery Disease               | 0.663 | 0.699 | 0.949 | 1.941 | 2.012 | 0.965 | Disease | 0.000 | 0.001 | M    |
| PGS004445 | Colorectal Cancer                     | 0.282 | 0.347 | 0.814 | 1.326 | 1.414 | 0.938 | Disease | 0.002 | 0.004 | M    |
| PGS004446 | Hypothyroidism                        | 0.906 | 0.920 | 0.985 | 2.475 | 2.510 | 0.986 | Disease | 0.297 | 0.391 | None |
| PGS004447 | Obesity                               | 0.884 | 0.874 | 1.012 | 2.420 | 2.396 | 1.010 | Disease | 0.370 | 0.470 | None |
| PGS004454 | Cataract                              | 0.479 | 0.515 | 0.929 | 1.614 | 1.674 | 0.964 | Disease | 0.000 | 0.000 | M    |
| PGS004455 | Hypertension                          | 0.723 | 0.677 | 1.067 | 2.060 | 1.968 | 1.047 | Disease | 0.000 | 0.000 | F    |
| PGS004456 | Hypertension                          | 0.772 | 0.747 | 1.033 | 2.165 | 2.111 | 1.025 | Disease | 0.001 | 0.002 | F    |
| PGS004457 | Coronary Artery Disease               | 0.496 | 0.532 | 0.933 | 1.642 | 1.702 | 0.965 | Disease | 0.000 | 0.000 | M    |
| PGS004458 | Coronary Artery Disease               | 0.375 | 0.458 | 0.818 | 1.455 | 1.581 | 0.920 | Disease | 0.000 | 0.000 | M    |
| PGS004460 | Pulmonary Embolism                    | 0.988 | 1.034 | 0.956 | 2.687 | 2.812 | 0.956 | Disease | 0.009 | 0.016 | M    |
| PGS004461 | Atrial Fibrillation                   | 0.838 | 0.884 | 0.949 | 2.313 | 2.419 | 0.956 | Disease | 0.000 | 0.000 | M    |
| PGS004462 | Heart Failure                         | 0.833 | 0.871 | 0.957 | 2.301 | 2.388 | 0.964 | Disease | 0.012 | 0.020 | M    |
| PGS004463 | Varicose Veins                        | 1.059 | 0.992 | 1.068 | 2.883 | 2.696 | 1.069 | Disease | 0.000 | 0.000 | F    |
| PGS004466 | Chronic Obstructive Pulmonary Disease | 0.867 | 0.927 | 0.936 | 2.381 | 2.526 | 0.943 | Disease | 0.000 | 0.000 | M    |
| PGS004467 | Asthma                                | 0.830 | 0.846 | 0.981 | 2.293 | 2.330 | 0.984 | Disease | 0.127 | 0.188 | None |
| PGS004468 | Gastroesophageal Reflux Disease       | 0.578 | 0.563 | 1.028 | 1.783 | 1.755 | 1.016 | Disease | 0.063 | 0.100 | None |
| PGS004471 | Inguinal Hernia                       | 0.972 | 0.958 | 1.014 | 2.643 | 2.607 | 1.014 | Disease | 0.546 | 0.639 | None |
| PGS004474 | Diverticular Disease                  | 0.757 | 0.755 | 1.002 | 2.131 | 2.128 | 1.002 | Disease | 0.860 | 0.899 | None |
| PGS004476 | Cholecystitis                         | 0.726 | 0.730 | 0.995 | 2.067 | 2.075 | 0.996 | Disease | 0.804 | 0.853 | None |
| PGS004478 | Osteoarthritis                        | 0.261 | 0.280 | 0.932 | 1.298 | 1.323 | 0.981 | Disease | 0.007 | 0.012 | M    |
| PGS004479 | Osteoarthritis                        | 0.359 | 0.442 | 0.811 | 1.432 | 1.556 | 0.920 | Disease | 0.000 | 0.000 | M    |
| PGS004484 | Spondylosis                           | 0.881 | 0.873 | 1.010 | 2.413 | 2.393 | 1.008 | Disease | 0.547 | 0.640 | None |
| PGS004485 | Spondylosis                           | 0.300 | 0.332 | 0.904 | 1.350 | 1.393 | 0.969 | Disease | 0.016 | 0.028 | M    |
| PGS004490 | Osteoporosis                          | 0.849 | 0.843 | 1.007 | 2.336 | 2.322 | 1.006 | Disease | 0.725 | 0.791 | None |
| PGS004495 | Osteoporosis                          | 0.822 | 0.866 | 0.950 | 2.275 | 2.377 | 0.957 | Disease | 0.012 | 0.020 | M    |
| PGS004499 | Type 2 Diabetes Mellitus              | 0.931 | 0.950 | 0.980 | 2.536 | 2.585 | 0.981 | Disease | 0.092 | 0.140 | None |
| PGS004501 | Venous Thromboembolism                | 0.774 | 0.746 | 1.039 | 2.169 | 2.108 | 1.029 | Disease | 0.036 | 0.058 | F    |
| PGS004509 | Asthma                                | 0.691 | 0.734 | 0.942 | 1.996 | 2.083 | 0.958 | Disease | 0.000 | 0.000 | M    |
| PGS004510 | Atrial Fibrillation                   | 0.658 | 0.680 | 0.967 | 1.930 | 1.974 | 0.978 | Disease | 0.044 | 0.071 | M    |
| PGS004512 | Lung Carcinoma                        | 0.845 | 0.918 | 0.920 | 2.327 | 2.505 | 0.929 | Disease | 0.002 | 0.003 | M    |
| PGS004513 | Coronary Artery Disease               | 0.543 | 0.671 | 0.809 | 1.721 | 1.957 | 0.879 | Disease | 0.000 | 0.000 | M    |
| PGS004514 | Coronary Artery Disease               | 0.612 | 0.630 | 0.972 | 1.845 | 1.877 | 0.983 | Disease | 0.083 | 0.128 | None |
| PGS004515 | Colorectal Cancer                     | 0.269 | 0.339 | 0.794 | 1.309 | 1.404 | 0.932 | Disease | 0.001 | 0.002 | M    |
| PGS004516 | Hypothyroidism                        | 0.892 | 0.895 | 0.997 | 2.441 | 2.447 | 0.997 | Disease | 0.843 | 0.883 | None |
| PGS004517 | Obesity                               | 0.389 | 0.387 | 1.006 | 1.475 | 1.472 | 1.002 | Disease | 0.835 | 0.876 | None |
| PGS004524 | Cataract                              | 0.454 | 0.486 | 0.934 | 1.574 | 1.625 | 0.969 | Disease | 0.000 | 0.001 | M    |
| PGS004525 | Hypertension                          | 0.681 | 0.624 | 1.091 | 1.975 | 1.866 | 1.059 | Disease | 0.000 | 0.000 | F    |
| PGS004526 | Hypertension                          | 0.745 | 0.694 | 1.073 | 2.107 | 2.002 | 1.052 | Disease | 0.000 | 0.000 | F    |
| PGS004527 | Coronary Artery Disease               | 0.496 | 0.512 | 0.969 | 1.643 | 1.669 | 0.984 | Disease | 0.110 | 0.165 | None |
| PGS004528 | Coronary Artery Disease               | 0.428 | 0.479 | 0.895 | 1.534 | 1.614 | 0.951 | Disease | 0.000 | 0.000 | M    |
| PGS004530 | Pulmonary Embolism                    | 0.931 | 0.963 | 0.967 | 2.538 | 2.619 | 0.969 | Disease | 0.103 | 0.155 | None |
| PGS004531 | Atrial Fibrillation                   | 0.726 | 0.777 | 0.934 | 2.066 | 2.175 | 0.950 | Disease | 0.000 | 0.000 | M    |
| PGS004532 | Heart Failure                         | 0.594 | 0.599 | 0.993 | 1.811 | 1.819 | 0.996 | Disease | 0.777 | 0.831 | None |
| PGS004533 | Varicose Veins                        | 0.963 | 0.898 | 1.072 | 2.619 | 2.454 | 1.067 | Disease | 0.000 | 0.000 | F    |
| PGS004536 | Chronic Obstructive Pulmonary Disease | 0.705 | 0.756 | 0.932 | 2.024 | 2.130 | 0.950 | Disease | 0.001 | 0.001 | M    |
| PGS004537 | Asthma                                | 0.740 | 0.768 | 0.963 | 2.095 | 2.156 | 0.972 | Disease | 0.006 | 0.010 | M    |
| PGS004538 | Gastroesophageal Reflux Disease       | 0.477 | 0.419 | 1.138 | 1.612 | 1.521 | 1.060 | Disease | 0.000 | 0.000 | F    |
| PGS004541 | Inguinal Hernia                       | 0.939 | 0.947 | 0.992 | 2.558 | 2.577 | 0.993 | Disease | 0.748 | 0.809 | None |
| PGS004544 | Diverticular Disease                  | 0.749 | 0.739 | 1.014 | 2.116 | 2.095 | 1.010 | Disease | 0.269 | 0.361 | None |
| PGS004546 | Cholecystitis                         | 0.647 | 0.590 | 1.095 | 1.909 | 1.805 | 1.058 | Disease | 0.001 | 0.001 | F    |
| PGS004548 | Osteoarthritis                        | 0.161 | 0.191 | 0.844 | 1.175 | 1.211 | 0.971 | Disease | 0.000 | 0.000 | M    |
| PGS004549 | Osteoarthritis                        | 0.382 | 0.448 | 0.852 | 1.465 | 1.565 | 0.936 | Disease | 0.000 | 0.000 | M    |
| PGS004554 | Spondylosis                           | 0.642 | 0.643 | 0.999 | 1.901 | 1.902 | 0.999 | Disease | 0.960 | 0.973 | None |
| PGS004555 | Spondylosis                           | 0.244 | 0.283 | 0.861 | 1.276 | 1.327 | 0.961 | Disease | 0.004 | 0.008 | M    |
| PGS004560 | Osteoporosis                          | 0.672 | 0.645 | 1.042 | 1.958 | 1.906 | 1.028 | Disease | 0.130 | 0.192 | None |
| PGS004565 | Osteoporosis                          | 0.666 | 0.657 | 1.014 | 1.947 | 1.929 | 1.009 | Disease | 0.613 | 0.698 | None |

|           |                                                 |       |       |       |       |       |       |         |       |       |      |
|-----------|-------------------------------------------------|-------|-------|-------|-------|-------|-------|---------|-------|-------|------|
| PGS004569 | Type 2 Diabetes Mellitus                        | 0.821 | 0.813 | 1.010 | 2.272 | 2.254 | 1.008 | Disease | 0.479 | 0.578 | None |
| PGS004571 | Venous Thromboembolism                          | 0.706 | 0.678 | 1.042 | 2.027 | 1.970 | 1.029 | Disease | 0.041 | 0.067 | F    |
| PGS004580 | Colorectal Cancer                               | 0.886 | 0.983 | 0.901 | 2.426 | 2.673 | 0.907 | Disease | 0.000 | 0.000 | M    |
| PGS004582 | Platelet Count                                  | 0.028 | 0.029 | 0.981 | NA    | NA    | NA    | QT      | 0.843 | 0.883 | None |
| PGS004583 | Platelet Count                                  | 0.025 | 0.025 | 1.007 | NA    | NA    | NA    | QT      | 0.953 | 0.969 | None |
| PGS004584 | Platelet Count                                  | 0.042 | 0.037 | 1.124 | NA    | NA    | NA    | QT      | 0.100 | 0.151 | None |
| PGS004586 | Colorectal Cancer                               | 0.025 | 0.030 | 0.840 | 1.026 | 1.030 | 0.995 | Disease | 0.829 | 0.872 | None |
| PGS004587 | Eczema                                          | 0.279 | 0.348 | 0.804 | 1.322 | 1.416 | 0.934 | Disease | 0.561 | 0.651 | None |
| PGS004588 | Alzheimer's Disease                             | 0.180 | 0.151 | 1.189 | 1.197 | 1.163 | 1.029 | Disease | 0.426 | 0.528 | None |
| PGS004589 | Alzheimer's Disease                             | 0.278 | 0.233 | 1.191 | 1.320 | 1.263 | 1.045 | Disease | 0.208 | 0.289 | None |
| PGS004590 | Alzheimer's Disease                             | 0.377 | 0.307 | 1.230 | 1.458 | 1.359 | 1.073 | Disease | 0.046 | 0.074 | F    |
| PGS004592 | Skin Carcinoma                                  | 0.444 | 0.460 | 0.965 | 1.560 | 1.585 | 0.984 | Disease | 0.157 | 0.226 | None |
| PGS004594 | Systolic Blood Pressure                         | 0.429 | 0.181 | 2.374 | NA    | NA    | NA    | QT      | 0.000 | 0.000 | F    |
| PGS004595 | Coronary Artery Disease                         | 0.235 | 0.327 | 0.719 | 1.265 | 1.387 | 0.912 | Disease | 0.000 | 0.000 | M    |
| PGS004596 | Coronary Artery Disease                         | 0.182 | 0.253 | 0.719 | 1.199 | 1.288 | 0.931 | Disease | 0.000 | 0.000 | M    |
| PGS004597 | Stroke                                          | 0.022 | 0.077 | 0.290 | 1.022 | 1.080 | 0.947 | Disease | 0.001 | 0.002 | M    |
| PGS004598 | Heart Failure                                   | 0.119 | 0.134 | 0.894 | 1.127 | 1.143 | 0.986 | Disease | 0.353 | 0.452 | None |
| PGS004600 | Alzheimer's Disease                             | 0.387 | 0.344 | 1.125 | 1.473 | 1.411 | 1.044 | Disease | 0.215 | 0.297 | None |
| PGS004602 | Type 2 Diabetes Mellitus                        | 0.528 | 0.539 | 0.980 | 1.696 | 1.715 | 0.989 | Disease | 0.312 | 0.407 | None |
| PGS004603 | Systolic Blood Pressure                         | 0.410 | 0.342 | 1.198 | NA    | NA    | NA    | QT      | 0.000 | 0.000 | F    |
| PGS004604 | Diastolic Blood Pressure                        | 0.393 | 0.359 | 1.096 | NA    | NA    | NA    | QT      | 0.000 | 0.000 | F    |
| PGS004606 | Age-Related Macular Degeneration                | 0.355 | 0.303 | 1.174 | 1.427 | 1.354 | 1.054 | Disease | 0.009 | 0.015 | F    |
| PGS004607 | Age-Related Macular Degeneration                | 0.033 | 0.027 | 1.261 | 1.034 | 1.027 | 1.007 | Disease | 0.731 | 0.797 | None |
| PGS004609 | Body Mass Index                                 | 0.275 | 0.223 | 1.237 | NA    | NA    | NA    | QT      | 0.000 | 0.000 | F    |
| PGS004610 | Body Mass Index                                 | 0.094 | 0.081 | 1.162 | NA    | NA    | NA    | QT      | 0.000 | 0.000 | F    |
| PGS004612 | Atrial Fibrillation                             | 0.090 | 0.065 | 1.386 | 1.094 | 1.067 | 1.025 | Disease | 0.024 | 0.040 | F    |
| PGS004613 | Atrial Fibrillation                             | 0.113 | 0.103 | 1.097 | 1.119 | 1.108 | 1.010 | Disease | 0.367 | 0.467 | None |
| PGS004614 | Diverticular Disease                            | 1.028 | 1.002 | 1.026 | 2.795 | 2.723 | 1.027 | Disease | 0.009 | 0.015 | F    |
| PGS004615 | Type 2 Diabetes Mellitus                        | 0.807 | 0.878 | 0.919 | 2.241 | 2.406 | 0.932 | Disease | 0.000 | 0.000 | M    |
| PGS004616 | Type 2 Diabetes Mellitus                        | 0.668 | 0.723 | 0.924 | 1.951 | 2.061 | 0.946 | Disease | 0.000 | 0.000 | M    |
| PGS004617 | Type 2 Diabetes Mellitus                        | 0.674 | 0.729 | 0.924 | 1.962 | 2.073 | 0.946 | Disease | 0.000 | 0.000 | M    |
| PGS004618 | Type 2 Diabetes Mellitus                        | 0.756 | 0.829 | 0.912 | 2.131 | 2.291 | 0.930 | Disease | 0.000 | 0.000 | M    |
| PGS004619 | Type 2 Diabetes Mellitus                        | 0.626 | 0.677 | 0.924 | 1.870 | 1.968 | 0.950 | Disease | 0.000 | 0.000 | M    |
| PGS004620 | Type 2 Diabetes Mellitus                        | 0.633 | 0.692 | 0.916 | 1.884 | 1.997 | 0.943 | Disease | 0.000 | 0.000 | M    |
| PGS004622 | ligh-Density Lipoprotein Cholesterol Measuremer | 0.278 | 0.230 | 1.210 | NA    | NA    | NA    | QT      | 0.000 | 0.000 | F    |
| PGS004623 | ligh-Density Lipoprotein Cholesterol Measuremer | 0.284 | 0.233 | 1.219 | NA    | NA    | NA    | QT      | 0.000 | 0.000 | F    |
| PGS004624 | ligh-Density Lipoprotein Cholesterol Measuremer | 0.396 | 0.320 | 1.239 | NA    | NA    | NA    | QT      | 0.000 | 0.000 | F    |
| PGS004625 | ligh-Density Lipoprotein Cholesterol Measuremer | 0.328 | 0.269 | 1.221 | NA    | NA    | NA    | QT      | 0.000 | 0.000 | F    |
| PGS004626 | ligh-Density Lipoprotein Cholesterol Measuremer | 0.314 | 0.257 | 1.222 | NA    | NA    | NA    | QT      | 0.000 | 0.000 | F    |
| PGS004627 | ligh-Density Lipoprotein Cholesterol Measuremer | 0.279 | 0.228 | 1.223 | NA    | NA    | NA    | QT      | 0.000 | 0.000 | F    |
| PGS004628 | ligh-Density Lipoprotein Cholesterol Measuremer | 0.266 | 0.216 | 1.231 | NA    | NA    | NA    | QT      | 0.000 | 0.000 | F    |
| PGS004629 | ligh-Density Lipoprotein Cholesterol Measuremer | 0.417 | 0.337 | 1.236 | NA    | NA    | NA    | QT      | 0.000 | 0.000 | F    |
| PGS004630 | ligh-Density Lipoprotein Cholesterol Measuremer | 0.388 | 0.314 | 1.236 | NA    | NA    | NA    | QT      | 0.000 | 0.000 | F    |
| PGS004631 | ligh-Density Lipoprotein Cholesterol Measuremer | 0.397 | 0.321 | 1.234 | NA    | NA    | NA    | QT      | 0.000 | 0.000 | F    |
| PGS004632 | ligh-Density Lipoprotein Cholesterol Measuremer | 0.274 | 0.229 | 1.194 | NA    | NA    | NA    | QT      | 0.000 | 0.000 | F    |
| PGS004633 | ligh-Density Lipoprotein Cholesterol Measuremer | 0.286 | 0.237 | 1.204 | NA    | NA    | NA    | QT      | 0.000 | 0.000 | F    |
| PGS004634 | ligh-Density Lipoprotein Cholesterol Measuremer | 0.431 | 0.350 | 1.233 | NA    | NA    | NA    | QT      | 0.000 | 0.000 | F    |
| PGS004635 | ligh-Density Lipoprotein Cholesterol Measuremer | 0.406 | 0.330 | 1.230 | NA    | NA    | NA    | QT      | 0.000 | 0.000 | F    |
| PGS004636 | ligh-Density Lipoprotein Cholesterol Measuremer | 0.415 | 0.338 | 1.228 | NA    | NA    | NA    | QT      | 0.000 | 0.000 | F    |
| PGS004637 | .ow-Density Lipoprotein Cholesterol Measuremer  | 0.260 | 0.210 | 1.237 | NA    | NA    | NA    | QT      | 0.000 | 0.000 | F    |
| PGS004638 | .ow-Density Lipoprotein Cholesterol Measuremer  | 0.253 | 0.211 | 1.204 | NA    | NA    | NA    | QT      | 0.000 | 0.000 | F    |
| PGS004639 | .ow-Density Lipoprotein Cholesterol Measuremer  | 0.339 | 0.283 | 1.198 | NA    | NA    | NA    | QT      | 0.000 | 0.000 | F    |
| PGS004640 | .ow-Density Lipoprotein Cholesterol Measuremer  | 0.299 | 0.241 | 1.238 | NA    | NA    | NA    | QT      | 0.000 | 0.000 | F    |
| PGS004641 | .ow-Density Lipoprotein Cholesterol Measuremer  | 0.298 | 0.246 | 1.211 | NA    | NA    | NA    | QT      | 0.000 | 0.000 | F    |
| PGS004642 | .ow-Density Lipoprotein Cholesterol Measuremer  | 0.146 | 0.128 | 1.141 | NA    | NA    | NA    | QT      | 0.000 | 0.000 | F    |
| PGS004643 | .ow-Density Lipoprotein Cholesterol Measuremer  | 0.132 | 0.116 | 1.140 | NA    | NA    | NA    | QT      | 0.000 | 0.000 | F    |

|           |                                                |        |        |       |       |       |       |         |       |       |      |
|-----------|------------------------------------------------|--------|--------|-------|-------|-------|-------|---------|-------|-------|------|
| PGS004644 | .ow-Density Lipoprotein Cholesterol Measuremer | 0.303  | 0.258  | 1.176 | NA    | NA    | NA    | QT      | 0.000 | 0.000 | F    |
| PGS004645 | .ow-Density Lipoprotein Cholesterol Measuremer | 0.316  | 0.266  | 1.186 | NA    | NA    | NA    | QT      | 0.000 | 0.000 | F    |
| PGS004646 | .ow-Density Lipoprotein Cholesterol Measuremer | 0.284  | 0.238  | 1.195 | NA    | NA    | NA    | QT      | 0.000 | 0.000 | F    |
| PGS004647 | .ow-Density Lipoprotein Cholesterol Measuremer | 0.240  | 0.204  | 1.175 | NA    | NA    | NA    | QT      | 0.000 | 0.000 | F    |
| PGS004648 | .ow-Density Lipoprotein Cholesterol Measuremer | 0.242  | 0.205  | 1.178 | NA    | NA    | NA    | QT      | 0.000 | 0.000 | F    |
| PGS004649 | .ow-Density Lipoprotein Cholesterol Measuremer | 0.357  | 0.297  | 1.200 | NA    | NA    | NA    | QT      | 0.000 | 0.000 | F    |
| PGS004650 | .ow-Density Lipoprotein Cholesterol Measuremer | 0.330  | 0.271  | 1.217 | NA    | NA    | NA    | QT      | 0.000 | 0.000 | F    |
| PGS004651 | .ow-Density Lipoprotein Cholesterol Measuremer | 0.334  | 0.279  | 1.196 | NA    | NA    | NA    | QT      | 0.000 | 0.000 | F    |
| PGS004652 | Triglyceride Measurement                       | 0.172  | 0.253  | 0.680 | NA    | NA    | NA    | QT      | 0.000 | 0.000 | M    |
| PGS004653 | Triglyceride Measurement                       | 0.189  | 0.275  | 0.687 | NA    | NA    | NA    | QT      | 0.000 | 0.000 | M    |
| PGS004654 | Triglyceride Measurement                       | 0.268  | 0.375  | 0.715 | NA    | NA    | NA    | QT      | 0.000 | 0.000 | M    |
| PGS004655 | Triglyceride Measurement                       | 0.215  | 0.310  | 0.693 | NA    | NA    | NA    | QT      | 0.000 | 0.000 | M    |
| PGS004656 | Triglyceride Measurement                       | 0.226  | 0.323  | 0.698 | NA    | NA    | NA    | QT      | 0.000 | 0.000 | M    |
| PGS004657 | Triglyceride Measurement                       | 0.157  | 0.232  | 0.678 | NA    | NA    | NA    | QT      | 0.000 | 0.000 | M    |
| PGS004658 | Triglyceride Measurement                       | 0.165  | 0.235  | 0.701 | NA    | NA    | NA    | QT      | 0.000 | 0.000 | M    |
| PGS004659 | Triglyceride Measurement                       | 0.237  | 0.334  | 0.711 | NA    | NA    | NA    | QT      | 0.000 | 0.000 | M    |
| PGS004660 | Triglyceride Measurement                       | 0.264  | 0.369  | 0.717 | NA    | NA    | NA    | QT      | 0.000 | 0.000 | M    |
| PGS004661 | Triglyceride Measurement                       | 0.263  | 0.365  | 0.720 | NA    | NA    | NA    | QT      | 0.000 | 0.000 | M    |
| PGS004662 | Triglyceride Measurement                       | 0.173  | 0.263  | 0.660 | NA    | NA    | NA    | QT      | 0.000 | 0.000 | M    |
| PGS004663 | Triglyceride Measurement                       | 0.182  | 0.275  | 0.659 | NA    | NA    | NA    | QT      | 0.000 | 0.000 | M    |
| PGS004664 | Triglyceride Measurement                       | 0.277  | 0.387  | 0.715 | NA    | NA    | NA    | QT      | 0.000 | 0.000 | M    |
| PGS004665 | Triglyceride Measurement                       | 0.255  | 0.364  | 0.700 | NA    | NA    | NA    | QT      | 0.000 | 0.000 | M    |
| PGS004666 | Triglyceride Measurement                       | 0.258  | 0.367  | 0.703 | NA    | NA    | NA    | QT      | 0.000 | 0.000 | M    |
| PGS004667 | Total Cholesterol Measurement                  | 0.223  | 0.198  | 1.124 | NA    | NA    | NA    | QT      | 0.000 | 0.000 | F    |
| PGS004668 | Total Cholesterol Measurement                  | 0.224  | 0.196  | 1.141 | NA    | NA    | NA    | QT      | 0.000 | 0.000 | F    |
| PGS004669 | Total Cholesterol Measurement                  | 0.303  | 0.263  | 1.153 | NA    | NA    | NA    | QT      | 0.000 | 0.000 | F    |
| PGS004670 | Total Cholesterol Measurement                  | 0.262  | 0.228  | 1.146 | NA    | NA    | NA    | QT      | 0.000 | 0.000 | F    |
| PGS004671 | Total Cholesterol Measurement                  | 0.275  | 0.239  | 1.148 | NA    | NA    | NA    | QT      | 0.000 | 0.000 | F    |
| PGS004672 | Total Cholesterol Measurement                  | 0.195  | 0.169  | 1.154 | NA    | NA    | NA    | QT      | 0.000 | 0.000 | F    |
| PGS004673 | Total Cholesterol Measurement                  | 0.213  | 0.187  | 1.141 | NA    | NA    | NA    | QT      | 0.000 | 0.000 | F    |
| PGS004674 | Total Cholesterol Measurement                  | 0.296  | 0.257  | 1.149 | NA    | NA    | NA    | QT      | 0.000 | 0.000 | F    |
| PGS004675 | Total Cholesterol Measurement                  | 0.286  | 0.248  | 1.150 | NA    | NA    | NA    | QT      | 0.000 | 0.000 | F    |
| PGS004676 | Total Cholesterol Measurement                  | 0.294  | 0.256  | 1.147 | NA    | NA    | NA    | QT      | 0.000 | 0.000 | F    |
| PGS004677 | Total Cholesterol Measurement                  | 0.158  | 0.153  | 1.033 | NA    | NA    | NA    | QT      | 0.161 | 0.231 | None |
| PGS004678 | Total Cholesterol Measurement                  | 0.176  | 0.164  | 1.073 | NA    | NA    | NA    | QT      | 0.001 | 0.002 | F    |
| PGS004679 | Total Cholesterol Measurement                  | 0.318  | 0.270  | 1.176 | NA    | NA    | NA    | QT      | 0.000 | 0.000 | F    |
| PGS004680 | Total Cholesterol Measurement                  | 0.301  | 0.262  | 1.151 | NA    | NA    | NA    | QT      | 0.000 | 0.000 | F    |
| PGS004681 | Total Cholesterol Measurement                  | 0.300  | 0.262  | 1.146 | NA    | NA    | NA    | QT      | 0.000 | 0.000 | F    |
| PGS004682 | Body Height                                    | 0.070  | 0.073  | 0.956 | NA    | NA    | NA    | QT      | 0.101 | 0.153 | None |
| PGS004683 | Body Height                                    | 0.071  | 0.077  | 0.927 | NA    | NA    | NA    | QT      | 0.004 | 0.008 | M    |
| PGS004684 | Body Height                                    | 0.222  | 0.240  | 0.929 | NA    | NA    | NA    | QT      | 0.000 | 0.000 | M    |
| PGS004685 | Body Height                                    | 0.179  | 0.193  | 0.930 | NA    | NA    | NA    | QT      | 0.000 | 0.000 | M    |
| PGS004686 | Body Height                                    | 0.151  | 0.164  | 0.923 | NA    | NA    | NA    | QT      | 0.000 | 0.000 | M    |
| PGS004687 | Urinary Bladder Carcinoma                      | 0.209  | 0.213  | 0.978 | 1.232 | 1.238 | 0.995 | Disease | 0.885 | 0.922 | None |
| PGS004689 | Colorectal Cancer                              | 0.225  | 0.252  | 0.891 | 1.252 | 1.287 | 0.973 | Disease | 0.213 | 0.294 | None |
| PGS004690 | Renal Carcinoma                                | 0.132  | 0.154  | 0.860 | 1.142 | 1.167 | 0.979 | Disease | 0.618 | 0.703 | None |
| PGS004691 | Lung Carcinoma                                 | -0.292 | -0.298 | 0.980 | 0.747 | 0.742 | 1.006 | Disease | 0.807 | 0.856 | None |
| PGS004693 | Pancreatic Carcinoma                           | 0.136  | 0.193  | 0.705 | 1.146 | 1.213 | 0.945 | Disease | 0.207 | 0.288 | None |
| PGS004696 | Coronary Artery Disease                        | 0.734  | 0.921  | 0.796 | 2.083 | 2.513 | 0.829 | Disease | 0.000 | 0.000 | M    |
| PGS004697 | Coronary Artery Disease                        | 0.797  | 0.992  | 0.804 | 2.219 | 2.696 | 0.823 | Disease | 0.000 | 0.000 | M    |
| PGS004698 | Coronary Artery Disease                        | 0.631  | 0.799  | 0.790 | 1.879 | 2.223 | 0.845 | Disease | 0.000 | 0.000 | M    |
| PGS004699 | Multiple Sclerosis                             | 0.570  | 0.670  | 0.851 | 1.768 | 1.953 | 0.905 | Disease | 0.042 | 0.068 | M    |
| PGS004700 | Multiple Sclerosis                             | 0.072  | 0.110  | 0.654 | 1.075 | 1.116 | 0.963 | Disease | 0.409 | 0.512 | None |
| PGS004701 | HbA1c Measurement                              | 0.318  | 0.413  | 0.768 | NA    | NA    | NA    | QT      | 0.000 | 0.000 | M    |
| PGS004702 | HbA1c Measurement                              | 0.295  | 0.403  | 0.731 | NA    | NA    | NA    | QT      | 0.000 | 0.000 | M    |
| PGS004703 | HbA1c Measurement                              | 0.284  | 0.402  | 0.707 | NA    | NA    | NA    | QT      | 0.000 | 0.000 | M    |

|           |                                            |       |       |       |       |       |       |         |       |       |      |
|-----------|--------------------------------------------|-------|-------|-------|-------|-------|-------|---------|-------|-------|------|
| PGS004704 | HbA1c Measurement                          | 0.295 | 0.403 | 0.731 | NA    | NA    | NA    | QT      | 0.000 | 0.000 | M    |
| PGS004705 | Atrial Fibrillation                        | 0.728 | 0.825 | 0.882 | 2.070 | 2.281 | 0.907 | Disease | 0.000 | 0.000 | M    |
| PGS004706 | Atrial Fibrillation                        | 0.745 | 0.821 | 0.908 | 2.107 | 2.272 | 0.928 | Disease | 0.000 | 0.000 | M    |
| PGS004707 | Serum Albumin Measurement                  | 0.386 | 0.384 | 1.006 | NA    | NA    | NA    | QT      | 0.386 | 0.487 | None |
| PGS004708 | Serum Albumin Measurement                  | 0.406 | 0.394 | 1.030 | NA    | NA    | NA    | QT      | 0.000 | 0.000 | F    |
| PGS004709 | Serum Albumin Measurement                  | 0.346 | 0.318 | 1.087 | NA    | NA    | NA    | QT      | 0.000 | 0.000 | F    |
| PGS004710 | Serum Albumin Measurement                  | 0.406 | 0.394 | 1.030 | NA    | NA    | NA    | QT      | 0.000 | 0.000 | F    |
| PGS004711 | Alkaline Phosphatase Measurement           | 0.443 | 0.441 | 1.004 | NA    | NA    | NA    | QT      | 0.472 | 0.571 | None |
| PGS004712 | Alkaline Phosphatase Measurement           | 0.457 | 0.454 | 1.008 | NA    | NA    | NA    | QT      | 0.134 | 0.197 | None |
| PGS004713 | Alkaline Phosphatase Measurement           | 0.445 | 0.433 | 1.028 | NA    | NA    | NA    | QT      | 0.000 | 0.000 | F    |
| PGS004714 | Alkaline Phosphatase Measurement           | 0.457 | 0.454 | 1.008 | NA    | NA    | NA    | QT      | 0.134 | 0.197 | None |
| PGS004715 | Serum Alanine Aminotransferase Measurement | 0.227 | 0.326 | 0.696 | NA    | NA    | NA    | QT      | 0.000 | 0.000 | M    |
| PGS004716 | Serum Alanine Aminotransferase Measurement | 0.254 | 0.357 | 0.711 | NA    | NA    | NA    | QT      | 0.000 | 0.000 | M    |
| PGS004717 | Serum Alanine Aminotransferase Measurement | 0.158 | 0.222 | 0.711 | NA    | NA    | NA    | QT      | 0.000 | 0.000 | M    |
| PGS004718 | Serum Alanine Aminotransferase Measurement | 0.254 | 0.357 | 0.711 | NA    | NA    | NA    | QT      | 0.000 | 0.000 | M    |
| PGS004719 | Aspartate Aminotransferase Measurement     | 0.229 | 0.296 | 0.773 | NA    | NA    | NA    | QT      | 0.000 | 0.000 | M    |
| PGS004720 | Aspartate Aminotransferase Measurement     | 0.243 | 0.316 | 0.767 | NA    | NA    | NA    | QT      | 0.000 | 0.000 | M    |
| PGS004721 | Aspartate Aminotransferase Measurement     | 0.169 | 0.229 | 0.739 | NA    | NA    | NA    | QT      | 0.000 | 0.000 | M    |
| PGS004722 | Aspartate Aminotransferase Measurement     | 0.249 | 0.322 | 0.774 | NA    | NA    | NA    | QT      | 0.000 | 0.000 | M    |
| PGS004723 | Asthma                                     | 0.739 | 0.789 | 0.937 | 2.094 | 2.200 | 0.952 | Disease | 0.000 | 0.000 | M    |
| PGS004724 | Asthma                                     | 0.573 | 0.615 | 0.933 | 1.774 | 1.849 | 0.959 | Disease | 0.000 | 0.000 | M    |
| PGS004725 | Asthma                                     | 0.769 | 0.806 | 0.954 | 2.157 | 2.238 | 0.964 | Disease | 0.001 | 0.001 | M    |
| PGS004726 | Asthma                                     | 0.573 | 0.615 | 0.933 | 1.774 | 1.849 | 0.959 | Disease | 0.000 | 0.000 | M    |
| PGS004728 | Basophil Count                             | 0.139 | 0.122 | 1.135 | NA    | NA    | NA    | QT      | 0.000 | 0.000 | F    |
| PGS004730 | Basophil Count                             | 0.139 | 0.122 | 1.135 | NA    | NA    | NA    | QT      | 0.000 | 0.000 | F    |
| PGS004731 | Bilirubin Measurement                      | 0.409 | 0.540 | 0.757 | NA    | NA    | NA    | QT      | 0.000 | 0.000 | M    |
| PGS004732 | Bilirubin Measurement                      | 0.404 | 0.533 | 0.759 | NA    | NA    | NA    | QT      | 0.000 | 0.000 | M    |
| PGS004733 | Body Mass Index                            | 0.535 | 0.443 | 1.210 | NA    | NA    | NA    | QT      | 0.000 | 0.000 | F    |
| PGS004734 | Body Mass Index                            | 0.494 | 0.416 | 1.189 | NA    | NA    | NA    | QT      | 0.000 | 0.000 | F    |
| PGS004735 | Body Mass Index                            | 0.523 | 0.431 | 1.214 | NA    | NA    | NA    | QT      | 0.000 | 0.000 | F    |
| PGS004736 | Body Mass Index                            | 0.494 | 0.416 | 1.189 | NA    | NA    | NA    | QT      | 0.000 | 0.000 | F    |
| PGS004739 | Urea Measurement                           | 0.310 | 0.353 | 0.877 | NA    | NA    | NA    | QT      | 0.000 | 0.000 | M    |
| PGS004740 | Urea Measurement                           | 0.322 | 0.365 | 0.881 | NA    | NA    | NA    | QT      | 0.000 | 0.000 | M    |
| PGS004741 | Urea Measurement                           | 0.313 | 0.356 | 0.879 | NA    | NA    | NA    | QT      | 0.000 | 0.000 | M    |
| PGS004742 | Urea Measurement                           | 0.322 | 0.365 | 0.881 | NA    | NA    | NA    | QT      | 0.000 | 0.000 | M    |
| PGS004743 | Coronary Artery Disease                    | 0.612 | 0.782 | 0.782 | 1.844 | 2.187 | 0.843 | Disease | 0.000 | 0.000 | M    |
| PGS004744 | Coronary Artery Disease                    | 0.500 | 0.596 | 0.839 | 1.649 | 1.815 | 0.908 | Disease | 0.000 | 0.000 | M    |
| PGS004745 | Coronary Artery Disease                    | 0.677 | 0.815 | 0.830 | 1.967 | 2.259 | 0.871 | Disease | 0.000 | 0.000 | M    |
| PGS004746 | Coronary Artery Disease                    | 0.609 | 0.768 | 0.794 | 1.839 | 2.154 | 0.854 | Disease | 0.000 | 0.000 | M    |
| PGS004747 | Creatinine Measurement                     | 0.276 | 0.338 | 0.816 | NA    | NA    | NA    | QT      | 0.000 | 0.000 | M    |
| PGS004748 | Creatinine Measurement                     | 0.282 | 0.342 | 0.825 | NA    | NA    | NA    | QT      | 0.000 | 0.000 | M    |
| PGS004749 | Creatinine Measurement                     | 0.290 | 0.355 | 0.816 | NA    | NA    | NA    | QT      | 0.000 | 0.000 | M    |
| PGS004750 | Creatinine Measurement                     | 0.282 | 0.342 | 0.825 | NA    | NA    | NA    | QT      | 0.000 | 0.000 | M    |
| PGS004751 | Smoking Status Measurement                 | 0.043 | 0.039 | 1.103 | NA    | NA    | NA    | QT      | 0.693 | 0.765 | None |
| PGS004752 | Smoking Status Measurement                 | 0.104 | 0.114 | 0.906 | NA    | NA    | NA    | QT      | 0.293 | 0.387 | None |
| PGS004754 | Smoking Status Measurement                 | 0.104 | 0.114 | 0.906 | NA    | NA    | NA    | QT      | 0.293 | 0.387 | None |
| PGS004755 | Diastolic Blood Pressure                   | 0.404 | 0.368 | 1.098 | NA    | NA    | NA    | QT      | 0.000 | 0.000 | F    |
| PGS004756 | Diastolic Blood Pressure                   | 0.374 | 0.322 | 1.161 | NA    | NA    | NA    | QT      | 0.000 | 0.000 | F    |
| PGS004757 | Diastolic Blood Pressure                   | 0.394 | 0.352 | 1.119 | NA    | NA    | NA    | QT      | 0.000 | 0.000 | F    |
| PGS004758 | Diastolic Blood Pressure                   | 0.371 | 0.323 | 1.150 | NA    | NA    | NA    | QT      | 0.000 | 0.000 | F    |
| PGS004761 | Eosinophil Count                           | 0.364 | 0.422 | 0.863 | NA    | NA    | NA    | QT      | 0.000 | 0.000 | M    |
| PGS004762 | Eosinophil Count                           | 0.366 | 0.419 | 0.873 | NA    | NA    | NA    | QT      | 0.000 | 0.000 | M    |
| PGS004763 | Eosinophil Count                           | 0.360 | 0.412 | 0.874 | NA    | NA    | NA    | QT      | 0.000 | 0.000 | M    |
| PGS004764 | Eosinophil Count                           | 0.367 | 0.421 | 0.872 | NA    | NA    | NA    | QT      | 0.000 | 0.000 | M    |
| PGS004765 | Glaucoma                                   | 0.836 | 0.919 | 0.909 | 2.307 | 2.507 | 0.920 | Disease | 0.000 | 0.000 | M    |
| PGS004766 | Glaucoma                                   | 0.825 | 0.911 | 0.905 | 2.281 | 2.487 | 0.917 | Disease | 0.000 | 0.000 | M    |

|           |                                                 |       |       |       |       |       |       |         |       |       |      |
|-----------|-------------------------------------------------|-------|-------|-------|-------|-------|-------|---------|-------|-------|------|
| PGS004767 | Gout                                            | 0.549 | 0.658 | 0.835 | 1.732 | 1.930 | 0.897 | Disease | 0.000 | 0.000 | M    |
| PGS004768 | Gout                                            | 0.770 | 0.837 | 0.920 | 2.160 | 2.310 | 0.935 | Disease | 0.009 | 0.016 | M    |
| PGS004775 | ligh-Density Lipoprotein Cholesterol Measuremer | 0.531 | 0.423 | 1.256 | NA    | NA    | NA    | QT      | 0.000 | 0.000 | F    |
| PGS004776 | ligh-Density Lipoprotein Cholesterol Measuremer | 0.525 | 0.419 | 1.254 | NA    | NA    | NA    | QT      | 0.000 | 0.000 | F    |
| PGS004777 | ligh-Density Lipoprotein Cholesterol Measuremer | 0.510 | 0.405 | 1.259 | NA    | NA    | NA    | QT      | 0.000 | 0.000 | F    |
| PGS004778 | ligh-Density Lipoprotein Cholesterol Measuremer | 0.525 | 0.419 | 1.254 | NA    | NA    | NA    | QT      | 0.000 | 0.000 | F    |
| PGS004779 | Body Height                                     | 0.464 | 0.506 | 0.918 | NA    | NA    | NA    | QT      | 0.000 | 0.000 | M    |
| PGS004780 | Body Height                                     | 0.458 | 0.499 | 0.918 | NA    | NA    | NA    | QT      | 0.000 | 0.000 | M    |
| PGS004782 | Body Height                                     | 0.458 | 0.499 | 0.917 | NA    | NA    | NA    | QT      | 0.000 | 0.000 | M    |
| PGS004783 | Hypercholesterolemia                            | 0.619 | 0.602 | 1.028 | 1.856 | 1.825 | 1.017 | Disease | 0.029 | 0.048 | F    |
| PGS004784 | Hypercholesterolemia                            | 0.637 | 0.612 | 1.041 | 1.890 | 1.843 | 1.026 | Disease | 0.001 | 0.002 | F    |
| PGS004785 | Hypertension                                    | 0.834 | 0.769 | 1.085 | 2.303 | 2.157 | 1.067 | Disease | 0.000 | 0.000 | F    |
| PGS004786 | Hypertension                                    | 0.800 | 0.756 | 1.058 | 2.225 | 2.129 | 1.045 | Disease | 0.000 | 0.000 | F    |
| PGS004788 | Hypertension                                    | 0.800 | 0.756 | 1.058 | 2.225 | 2.129 | 1.045 | Disease | 0.000 | 0.000 | F    |
| PGS004789 | Hypothyroidism                                  | 1.281 | 1.096 | 1.169 | 3.600 | 2.992 | 1.203 | Disease | 0.000 | 0.000 | F    |
| PGS004790 | Hypothyroidism                                  | 1.199 | 1.036 | 1.158 | 3.317 | 2.817 | 1.177 | Disease | 0.000 | 0.000 | F    |
| PGS004791 | .ow-Density Lipoprotein Cholesterol Measuremer  | 0.389 | 0.333 | 1.165 | NA    | NA    | NA    | QT      | 0.000 | 0.000 | F    |
| PGS004792 | .ow-Density Lipoprotein Cholesterol Measuremer  | 0.385 | 0.320 | 1.201 | NA    | NA    | NA    | QT      | 0.000 | 0.000 | F    |
| PGS004793 | .ow-Density Lipoprotein Cholesterol Measuremer  | 0.379 | 0.329 | 1.153 | NA    | NA    | NA    | QT      | 0.000 | 0.000 | F    |
| PGS004794 | .ow-Density Lipoprotein Cholesterol Measuremer  | 0.386 | 0.322 | 1.198 | NA    | NA    | NA    | QT      | 0.000 | 0.000 | F    |
| PGS004795 | Melanoma                                        | 0.450 | 0.449 | 1.003 | 1.569 | 1.567 | 1.001 | Disease | 0.953 | 0.969 | None |
| PGS004796 | Melanoma                                        | 0.451 | 0.453 | 0.995 | 1.569 | 1.573 | 0.998 | Disease | 0.932 | 0.956 | None |
| PGS004797 | Migraine Disorder                               | 0.116 | 0.103 | 1.127 | 1.123 | 1.109 | 1.013 | Disease | 0.617 | 0.702 | None |
| PGS004798 | Migraine Disorder                               | 0.437 | 0.378 | 1.158 | 1.549 | 1.459 | 1.061 | Disease | 0.023 | 0.038 | F    |
| PGS004799 | Migraine Disorder                               | 0.444 | 0.424 | 1.047 | 1.558 | 1.528 | 1.020 | Disease | 0.444 | 0.544 | None |
| PGS004800 | Migraine Disorder                               | 0.598 | 0.515 | 1.161 | 1.818 | 1.674 | 1.086 | Disease | 0.001 | 0.002 | F    |
| PGS004801 | Monocyte Count                                  | 0.341 | 0.397 | 0.861 | NA    | NA    | NA    | QT      | 0.000 | 0.000 | M    |
| PGS004802 | Monocyte Count                                  | 0.342 | 0.401 | 0.853 | NA    | NA    | NA    | QT      | 0.000 | 0.000 | M    |
| PGS004804 | Monocyte Count                                  | 0.342 | 0.401 | 0.853 | NA    | NA    | NA    | QT      | 0.000 | 0.000 | M    |
| PGS004805 | Neutrophil Count                                | 0.411 | 0.415 | 0.991 | NA    | NA    | NA    | QT      | 0.156 | 0.226 | None |
| PGS004806 | Neutrophil Count                                | 0.430 | 0.431 | 0.997 | NA    | NA    | NA    | QT      | 0.649 | 0.731 | None |
| PGS004807 | Neutrophil Count                                | 0.434 | 0.435 | 0.998 | NA    | NA    | NA    | QT      | 0.696 | 0.767 | None |
| PGS004808 | Neutrophil Count                                | 0.431 | 0.432 | 0.997 | NA    | NA    | NA    | QT      | 0.651 | 0.732 | None |
| PGS004809 | Osteoporosis                                    | 0.564 | 0.503 | 1.122 | 1.758 | 1.654 | 1.063 | Disease | 0.001 | 0.002 | F    |
| PGS004810 | Osteoporosis                                    | 0.569 | 0.480 | 1.185 | 1.767 | 1.617 | 1.093 | Disease | 0.000 | 0.000 | F    |
| PGS004811 | Platelet Count                                  | 0.568 | 0.508 | 1.120 | NA    | NA    | NA    | QT      | 0.000 | 0.000 | F    |
| PGS004812 | Platelet Count                                  | 0.566 | 0.503 | 1.125 | NA    | NA    | NA    | QT      | 0.000 | 0.000 | F    |
| PGS004814 | Platelet Count                                  | 0.566 | 0.503 | 1.125 | NA    | NA    | NA    | QT      | 0.000 | 0.000 | F    |
| PGS004817 | Rheumatoid Arthritis                            | 0.442 | 0.426 | 1.037 | 1.556 | 1.531 | 1.016 | Disease | 0.446 | 0.546 | None |
| PGS004818 | Rheumatoid Arthritis                            | 0.236 | 0.246 | 0.958 | 1.266 | 1.279 | 0.990 | Disease | 0.629 | 0.713 | None |
| PGS004819 | Rheumatoid Arthritis                            | 0.548 | 0.534 | 1.026 | 1.729 | 1.706 | 1.014 | Disease | 0.524 | 0.617 | None |
| PGS004820 | Rheumatoid Arthritis                            | 0.236 | 0.246 | 0.958 | 1.266 | 1.279 | 0.990 | Disease | 0.629 | 0.713 | None |
| PGS004821 | Erythrocyte Count                               | 0.412 | 0.453 | 0.909 | NA    | NA    | NA    | QT      | 0.000 | 0.000 | M    |
| PGS004822 | Erythrocyte Count                               | 0.405 | 0.445 | 0.910 | NA    | NA    | NA    | QT      | 0.000 | 0.000 | M    |
| PGS004823 | Erythrocyte Count                               | 0.403 | 0.443 | 0.911 | NA    | NA    | NA    | QT      | 0.000 | 0.000 | M    |
| PGS004824 | Erythrocyte Count                               | 0.407 | 0.447 | 0.910 | NA    | NA    | NA    | QT      | 0.000 | 0.000 | M    |
| PGS004825 | Red Cell Distribution Width                     | 0.391 | 0.342 | 1.144 | NA    | NA    | NA    | QT      | 0.000 | 0.000 | F    |
| PGS004826 | Red Cell Distribution Width                     | 0.368 | 0.320 | 1.152 | NA    | NA    | NA    | QT      | 0.000 | 0.000 | F    |
| PGS004827 | Red Cell Distribution Width                     | 0.367 | 0.316 | 1.164 | NA    | NA    | NA    | QT      | 0.000 | 0.000 | F    |
| PGS004828 | Red Cell Distribution Width                     | 0.368 | 0.320 | 1.152 | NA    | NA    | NA    | QT      | 0.000 | 0.000 | F    |
| PGS004829 | Systolic Blood Pressure                         | 0.399 | 0.341 | 1.168 | NA    | NA    | NA    | QT      | 0.000 | 0.000 | F    |
| PGS004830 | Systolic Blood Pressure                         | 0.360 | 0.295 | 1.223 | NA    | NA    | NA    | QT      | 0.000 | 0.000 | F    |
| PGS004831 | Systolic Blood Pressure                         | 0.371 | 0.306 | 1.210 | NA    | NA    | NA    | QT      | 0.000 | 0.000 | F    |
| PGS004832 | Systolic Blood Pressure                         | 0.368 | 0.297 | 1.241 | NA    | NA    | NA    | QT      | 0.000 | 0.000 | F    |
| PGS004833 | Melanoma                                        | 0.573 | 0.588 | 0.974 | 1.774 | 1.801 | 0.985 | Disease | 0.551 | 0.642 | None |
| PGS004834 | Melanoma                                        | 0.570 | 0.570 | 1.001 | 1.768 | 1.767 | 1.000 | Disease | 0.989 | 0.991 | None |

|           |                                                  |        |        |       |       |       |       |         |       |       |      |
|-----------|--------------------------------------------------|--------|--------|-------|-------|-------|-------|---------|-------|-------|------|
| PGS004835 | Stroke                                           | 0.239  | 0.271  | 0.884 | 1.271 | 1.311 | 0.969 | Disease | 0.061 | 0.096 | None |
| PGS004837 | Type 2 Diabetes Mellitus                         | 0.970  | 0.990  | 0.980 | 2.639 | 2.692 | 0.981 | Disease | 0.097 | 0.147 | None |
| PGS004838 | Type 2 Diabetes Mellitus                         | 0.982  | 0.966  | 1.016 | 2.669 | 2.628 | 1.016 | Disease | 0.186 | 0.262 | None |
| PGS004839 | Type 2 Diabetes Mellitus                         | 1.058  | 1.019  | 1.039 | 2.882 | 2.770 | 1.040 | Disease | 0.001 | 0.002 | F    |
| PGS004840 | Type 2 Diabetes Mellitus                         | 0.982  | 0.966  | 1.016 | 2.669 | 2.628 | 1.016 | Disease | 0.186 | 0.262 | None |
| PGS004841 | Total Cholesterol Measurement                    | 0.370  | 0.329  | 1.127 | NA    | NA    | NA    | QT      | 0.000 | 0.000 | F    |
| PGS004842 | Total Cholesterol Measurement                    | 0.339  | 0.283  | 1.200 | NA    | NA    | NA    | QT      | 0.000 | 0.000 | F    |
| PGS004843 | Total Cholesterol Measurement                    | 0.351  | 0.314  | 1.119 | NA    | NA    | NA    | QT      | 0.000 | 0.000 | F    |
| PGS004844 | Total Cholesterol Measurement                    | 0.339  | 0.284  | 1.195 | NA    | NA    | NA    | QT      | 0.000 | 0.000 | F    |
| PGS004845 | Triglyceride Measurement                         | 0.365  | 0.507  | 0.721 | NA    | NA    | NA    | QT      | 0.000 | 0.000 | M    |
| PGS004846 | Triglyceride Measurement                         | 0.343  | 0.467  | 0.735 | NA    | NA    | NA    | QT      | 0.000 | 0.000 | M    |
| PGS004847 | Triglyceride Measurement                         | 0.364  | 0.487  | 0.747 | NA    | NA    | NA    | QT      | 0.000 | 0.000 | M    |
| PGS004848 | Triglyceride Measurement                         | 0.346  | 0.469  | 0.738 | NA    | NA    | NA    | QT      | 0.000 | 0.000 | M    |
| PGS004849 | Total Blood Protein Measurement                  | 0.433  | 0.435  | 0.997 | NA    | NA    | NA    | QT      | 0.659 | 0.739 | None |
| PGS004850 | Total Blood Protein Measurement                  | 0.447  | 0.449  | 0.996 | NA    | NA    | NA    | QT      | 0.473 | 0.572 | None |
| PGS004851 | Total Blood Protein Measurement                  | 0.420  | 0.422  | 0.997 | NA    | NA    | NA    | QT      | 0.671 | 0.748 | None |
| PGS004852 | Total Blood Protein Measurement                  | 0.422  | 0.423  | 0.997 | NA    | NA    | NA    | QT      | 0.654 | 0.735 | None |
| PGS004853 | Venous Thromboembolism                           | 0.338  | 0.432  | 0.784 | 1.403 | 1.540 | 0.911 | Disease | 0.000 | 0.000 | M    |
| PGS004854 | Venous Thromboembolism                           | 0.448  | 0.520  | 0.861 | 1.565 | 1.682 | 0.931 | Disease | 0.000 | 0.000 | M    |
| PGS004855 | Leukocyte Count                                  | 0.409  | 0.406  | 1.008 | NA    | NA    | NA    | QT      | 0.251 | 0.341 | None |
| PGS004856 | Leukocyte Count                                  | 0.403  | 0.397  | 1.017 | NA    | NA    | NA    | QT      | 0.015 | 0.025 | F    |
| PGS004857 | Leukocyte Count                                  | 0.404  | 0.397  | 1.017 | NA    | NA    | NA    | QT      | 0.011 | 0.020 | F    |
| PGS004858 | Leukocyte Count                                  | 0.403  | 0.397  | 1.017 | NA    | NA    | NA    | QT      | 0.015 | 0.025 | F    |
| PGS004859 | Type 2 Diabetes Mellitus                         | 0.904  | 0.905  | 0.999 | 2.470 | 2.473 | 0.999 | Disease | 0.926 | 0.952 | None |
| PGS004860 | Lung Carcinoma                                   | 0.197  | 0.226  | 0.872 | 1.218 | 1.254 | 0.971 | Disease | 0.245 | 0.334 | None |
| PGS004863 | Alzheimer's Disease                              | 0.280  | 0.276  | 1.014 | 1.323 | 1.318 | 1.004 | Disease | 0.911 | 0.941 | None |
| PGS004864 | Body Mass Index                                  | 0.011  | 0.018  | 0.629 | NA    | NA    | NA    | QT      | 0.019 | 0.032 | M    |
| PGS004868 | Type 2 Diabetes Mellitus                         | 0.448  | 0.438  | 1.023 | 1.565 | 1.549 | 1.010 | Disease | 0.340 | 0.437 | None |
| PGS004870 | Type 2 Diabetes Mellitus                         | 0.936  | 0.965  | 0.970 | 2.549 | 2.625 | 0.971 | Disease | 0.012 | 0.021 | M    |
| PGS004871 | Gout                                             | 0.560  | 0.642  | 0.871 | 1.750 | 1.901 | 0.920 | Disease | 0.002 | 0.004 | M    |
| PGS004873 | Rheumatoid Arthritis                             | 0.394  | 0.371  | 1.060 | 1.482 | 1.450 | 1.022 | Disease | 0.296 | 0.390 | None |
| PGS004874 | Type 1 Diabetes Mellitus                         | 0.585  | 0.469  | 1.246 | 1.794 | 1.599 | 1.122 | Disease | 0.000 | 0.000 | F    |
| PGS004877 | Asthma                                           | 0.875  | 0.923  | 0.948 | 2.398 | 2.516 | 0.953 | Disease | 0.000 | 0.000 | M    |
| PGS004878 | Atrial Fibrillation                              | 0.719  | 0.817  | 0.880 | 2.052 | 2.263 | 0.907 | Disease | 0.000 | 0.000 | M    |
| PGS004879 | Coronary Artery Disease                          | 0.309  | 0.403  | 0.769 | 1.363 | 1.496 | 0.911 | Disease | 0.000 | 0.000 | M    |
| PGS004880 | Colorectal Cancer                                | 0.872  | 0.952  | 0.917 | 2.393 | 2.590 | 0.924 | Disease | 0.000 | 0.001 | M    |
| PGS004882 | Osteoarthritis                                   | 0.321  | 0.340  | 0.944 | 1.379 | 1.406 | 0.981 | Disease | 0.007 | 0.013 | M    |
| PGS004883 | Osteoarthritis                                   | 0.449  | 0.550  | 0.817 | 1.567 | 1.733 | 0.904 | Disease | 0.000 | 0.000 | M    |
| PGS004884 | Lung Carcinoma                                   | 0.699  | 0.733  | 0.955 | 2.013 | 2.081 | 0.967 | Disease | 0.182 | 0.258 | None |
| PGS004886 | Melanoma                                         | 1.082  | 1.002  | 1.080 | 2.951 | 2.724 | 1.083 | Disease | 0.001 | 0.002 | F    |
| PGS004887 | Type 2 Diabetes Mellitus                         | -0.899 | -0.904 | 0.994 | 0.407 | 0.405 | 1.005 | Disease | 0.662 | 0.741 | None |
| PGS004888 | Coronary Artery Disease                          | -0.464 | -0.599 | 0.774 | 0.629 | 0.549 | 1.145 | Disease | 0.000 | 0.000 | M    |
| PGS004889 | Chronic Kidney Disease                           | 0.259  | 0.216  | 1.203 | 1.296 | 1.241 | 1.045 | Disease | 0.001 | 0.002 | F    |
| PGS004898 | Alzheimer's Disease                              | 0.315  | 0.272  | 1.156 | 1.370 | 1.313 | 1.043 | Disease | 0.234 | 0.320 | None |
| PGS004900 | Body Mass Index                                  | 0.127  | 0.116  | 1.094 | NA    | NA    | NA    | QT      | 0.000 | 0.000 | F    |
| PGS004901 | Body Mass Index                                  | 0.130  | 0.114  | 1.143 | NA    | NA    | NA    | QT      | 0.000 | 0.000 | F    |
| PGS004902 | Body Mass Index                                  | 0.343  | 0.277  | 1.238 | NA    | NA    | NA    | QT      | 0.000 | 0.000 | F    |
| PGS004903 | Eczema                                           | 0.060  | 0.120  | 0.503 | 1.062 | 1.127 | 0.942 | Disease | 0.620 | 0.705 | None |
| PGS004904 | Colorectal Cancer                                | 0.379  | 0.416  | 0.911 | 1.461 | 1.517 | 0.964 | Disease | 0.097 | 0.147 | None |
| PGS004905 | Atrial Fibrillation                              | 0.447  | 0.494  | 0.906 | 1.564 | 1.638 | 0.955 | Disease | 0.000 | 0.000 | M    |
| PGS004908 | Renal Carcinoma                                  | 0.366  | 0.360  | 1.018 | 1.443 | 1.433 | 1.006 | Disease | 0.882 | 0.919 | None |
| PGS004912 | Colorectal Cancer                                | 0.335  | 0.366  | 0.914 | 1.398 | 1.442 | 0.969 | Disease | 0.153 | 0.222 | None |
| PGS004914 | High-Density Lipoprotein Cholesterol Measurement | 0.276  | 0.224  | 1.231 | NA    | NA    | NA    | QT      | 0.000 | 0.000 | F    |
| PGS004915 | Low-Density Lipoprotein Cholesterol Measurement  | 0.219  | 0.181  | 1.207 | NA    | NA    | NA    | QT      | 0.000 | 0.000 | F    |
| PGS004916 | Triglyceride Measurement                         | 0.192  | 0.272  | 0.708 | NA    | NA    | NA    | QT      | 0.000 | 0.000 | M    |
| PGS004917 | Systemic Lupus Erythematosus                     | 0.469  | 0.208  | 2.262 | 1.599 | 1.231 | 1.299 | Disease | 0.006 | 0.011 | F    |

|           |                                                 |       |       |       |       |       |       |         |       |       |      |
|-----------|-------------------------------------------------|-------|-------|-------|-------|-------|-------|---------|-------|-------|------|
| PGS004918 | Alzheimer's Disease                             | 0.748 | 0.617 | 1.211 | 2.113 | 1.854 | 1.139 | Disease | 0.000 | 0.000 | F    |
| PGS004919 | Coronary Artery Disease                         | 0.128 | 0.168 | 0.760 | 1.136 | 1.183 | 0.961 | Disease | 0.000 | 0.000 | M    |
| PGS004920 | Atrial Fibrillation                             | 0.457 | 0.503 | 0.909 | 1.579 | 1.653 | 0.955 | Disease | 0.000 | 0.000 | M    |
| PGS004921 | Coronary Artery Disease                         | 0.260 | 0.372 | 0.698 | 1.297 | 1.451 | 0.893 | Disease | 0.000 | 0.000 | M    |
| PGS004923 | Type 2 Diabetes Mellitus                        | 0.737 | 0.721 | 1.021 | 2.089 | 2.057 | 1.015 | Disease | 0.171 | 0.244 | None |
| PGS004924 | Parkinson's Disease                             | 0.367 | 0.335 | 1.095 | 1.444 | 1.398 | 1.032 | Disease | 0.300 | 0.394 | None |
| PGS004925 | Coronary Artery Disease                         | 0.265 | 0.372 | 0.714 | 1.304 | 1.450 | 0.899 | Disease | 0.000 | 0.000 | M    |
| PGS004929 | Atrial Fibrillation                             | 0.378 | 0.379 | 0.995 | 1.459 | 1.462 | 0.998 | Disease | 0.868 | 0.907 | None |
| PGS004930 | Celiac Disease                                  | 1.152 | 1.155 | 0.998 | 3.166 | 3.174 | 0.997 | Disease | 0.930 | 0.955 | None |
| PGS004931 | Gout                                            | 0.622 | 0.709 | 0.878 | 1.863 | 2.031 | 0.917 | Disease | 0.001 | 0.001 | M    |
| PGS004932 | High-Density Lipoprotein Cholesterol Measuremer | 0.472 | 0.373 | 1.265 | NA    | NA    | NA    | QT      | 0.000 | 0.000 | F    |
| PGS004934 | Hypertension                                    | 0.787 | 0.763 | 1.032 | 2.198 | 2.144 | 1.025 | Disease | 0.001 | 0.002 | F    |
| PGS004935 | Hypothyroidism                                  | 0.921 | 0.902 | 1.022 | 2.512 | 2.464 | 1.020 | Disease | 0.173 | 0.246 | None |
| PGS004936 | Low-Density Lipoprotein Cholesterol Measuremer  | 0.297 | 0.246 | 1.207 | NA    | NA    | NA    | QT      | 0.000 | 0.000 | F    |
| PGS004937 | Triglyceride Measurement                        | 0.287 | 0.411 | 0.699 | NA    | NA    | NA    | QT      | 0.000 | 0.000 | M    |
| PGS004941 | Coronary Artery Disease                         | 0.624 | 0.794 | 0.786 | 1.867 | 2.212 | 0.844 | Disease | 0.000 | 0.000 | M    |
| PGS004942 | Stroke                                          | 0.272 | 0.290 | 0.936 | 1.312 | 1.336 | 0.982 | Disease | 0.273 | 0.365 | None |
| PGS004943 | Stroke                                          | 0.210 | 0.220 | 0.954 | 1.233 | 1.246 | 0.990 | Disease | 0.553 | 0.645 | None |
| PGS004944 | Glaucoma                                        | 0.158 | 0.169 | 0.937 | 1.171 | 1.184 | 0.989 | Disease | 0.550 | 0.642 | None |
| PGS004945 | Colorectal Cancer                               | 0.358 | 0.391 | 0.916 | 1.430 | 1.478 | 0.968 | Disease | 0.142 | 0.208 | None |
| PGS004952 | Age-Related Macular Degeneration                | 0.351 | 0.302 | 1.162 | 1.421 | 1.353 | 1.050 | Disease | 0.014 | 0.024 | F    |
| PGS004953 | Melanoma                                        | 0.347 | 0.336 | 1.031 | 1.415 | 1.400 | 1.011 | Disease | 0.703 | 0.773 | None |
| PGS004954 | Thyroid Carcinoma                               | 0.433 | 0.539 | 0.802 | 1.541 | 1.715 | 0.899 | Disease | 0.136 | 0.200 | None |
| PGS004955 | Lung Carcinoma                                  | 0.109 | 0.066 | 1.649 | 1.116 | 1.069 | 1.044 | Disease | 0.081 | 0.125 | None |
| PGS004969 | Low-Density Lipoprotein Cholesterol Measuremer  | 0.176 | 0.151 | 1.171 | NA    | NA    | NA    | QT      | 0.000 | 0.000 | F    |
| PGS004970 | Low-Density Lipoprotein Cholesterol Measuremer  | 0.204 | 0.208 | 0.984 | NA    | NA    | NA    | QT      | 0.247 | 0.337 | None |
| PGS004971 | Low-Density Lipoprotein Cholesterol Measuremer  | 0.172 | 0.157 | 1.097 | NA    | NA    | NA    | QT      | 0.000 | 0.000 | F    |
| PGS004972 | Low-Density Lipoprotein Cholesterol Measuremer  | 0.244 | 0.226 | 1.076 | NA    | NA    | NA    | QT      | 0.000 | 0.000 | F    |
| PGS004973 | Low-Density Lipoprotein Cholesterol Measuremer  | 0.268 | 0.249 | 1.076 | NA    | NA    | NA    | QT      | 0.000 | 0.000 | F    |
| PGS004974 | Low-Density Lipoprotein Cholesterol Measuremer  | 0.254 | 0.243 | 1.048 | NA    | NA    | NA    | QT      | 0.000 | 0.000 | F    |
| PGS004975 | Low-Density Lipoprotein Cholesterol Measuremer  | 0.170 | 0.146 | 1.167 | NA    | NA    | NA    | QT      | 0.000 | 0.000 | F    |
| PGS004976 | Low-Density Lipoprotein Cholesterol Measuremer  | 0.255 | 0.244 | 1.042 | NA    | NA    | NA    | QT      | 0.000 | 0.000 | F    |
| PGS004977 | Low-Density Lipoprotein Cholesterol Measuremer  | 0.180 | 0.163 | 1.106 | NA    | NA    | NA    | QT      | 0.000 | 0.000 | F    |
| PGS004978 | Low-Density Lipoprotein Cholesterol Measuremer  | 0.249 | 0.227 | 1.098 | NA    | NA    | NA    | QT      | 0.000 | 0.000 | F    |
| PGS004979 | Low-Density Lipoprotein Cholesterol Measuremer  | 0.285 | 0.260 | 1.096 | NA    | NA    | NA    | QT      | 0.000 | 0.000 | F    |
| PGS004980 | Low-Density Lipoprotein Cholesterol Measuremer  | 0.275 | 0.255 | 1.079 | NA    | NA    | NA    | QT      | 0.000 | 0.000 | F    |
| PGS004981 | Low-Density Lipoprotein Cholesterol Measuremer  | 0.299 | 0.269 | 1.111 | NA    | NA    | NA    | QT      | 0.000 | 0.000 | F    |
| PGS004982 | Body Mass Index                                 | 0.131 | 0.121 | 1.079 | NA    | NA    | NA    | QT      | 0.001 | 0.001 | F    |
| PGS004983 | Body Mass Index                                 | 0.250 | 0.227 | 1.103 | NA    | NA    | NA    | QT      | 0.000 | 0.000 | F    |
| PGS004984 | Body Mass Index                                 | 0.161 | 0.147 | 1.099 | NA    | NA    | NA    | QT      | 0.000 | 0.000 | F    |
| PGS004985 | Body Mass Index                                 | 0.283 | 0.259 | 1.090 | NA    | NA    | NA    | QT      | 0.000 | 0.000 | F    |
| PGS004986 | Body Mass Index                                 | 0.290 | 0.265 | 1.093 | NA    | NA    | NA    | QT      | 0.000 | 0.000 | F    |
| PGS004987 | Body Mass Index                                 | 0.307 | 0.281 | 1.093 | NA    | NA    | NA    | QT      | 0.000 | 0.000 | F    |
| PGS004988 | Body Mass Index                                 | 0.114 | 0.107 | 1.072 | NA    | NA    | NA    | QT      | 0.006 | 0.010 | F    |
| PGS004989 | Body Mass Index                                 | 0.328 | 0.298 | 1.100 | NA    | NA    | NA    | QT      | 0.000 | 0.000 | F    |
| PGS004990 | Body Mass Index                                 | 0.153 | 0.141 | 1.085 | NA    | NA    | NA    | QT      | 0.000 | 0.000 | F    |
| PGS004991 | Body Mass Index                                 | 0.258 | 0.239 | 1.081 | NA    | NA    | NA    | QT      | 0.000 | 0.000 | F    |
| PGS004992 | Body Mass Index                                 | 0.294 | 0.270 | 1.088 | NA    | NA    | NA    | QT      | 0.000 | 0.000 | F    |
| PGS004993 | Body Mass Index                                 | 0.299 | 0.276 | 1.087 | NA    | NA    | NA    | QT      | 0.000 | 0.000 | F    |
| PGS004994 | Body Mass Index                                 | 0.325 | 0.298 | 1.090 | NA    | NA    | NA    | QT      | 0.000 | 0.000 | F    |
| PGS004995 | Body Height                                     | 0.185 | 0.199 | 0.927 | NA    | NA    | NA    | QT      | 0.000 | 0.000 | M    |
| PGS004996 | Body Height                                     | 0.295 | 0.328 | 0.898 | NA    | NA    | NA    | QT      | 0.000 | 0.000 | M    |
| PGS004997 | Body Height                                     | 0.216 | 0.239 | 0.903 | NA    | NA    | NA    | QT      | 0.000 | 0.000 | M    |
| PGS004998 | Body Height                                     | 0.313 | 0.345 | 0.907 | NA    | NA    | NA    | QT      | 0.000 | 0.000 | M    |
| PGS004999 | Body Height                                     | 0.330 | 0.365 | 0.903 | NA    | NA    | NA    | QT      | 0.000 | 0.000 | M    |
| PGS005000 | Body Height                                     | 0.312 | 0.348 | 0.897 | NA    | NA    | NA    | QT      | 0.000 | 0.000 | M    |

|           |                          |       |       |       |       |       |       |         |       |       |      |
|-----------|--------------------------|-------|-------|-------|-------|-------|-------|---------|-------|-------|------|
| PGS005001 | Body Height              | 0.173 | 0.189 | 0.918 | NA    | NA    | NA    | QT      | 0.000 | 0.000 | M    |
| PGS005002 | Body Height              | 0.361 | 0.401 | 0.901 | NA    | NA    | NA    | QT      | 0.000 | 0.000 | M    |
| PGS005003 | Body Height              | 0.225 | 0.247 | 0.909 | NA    | NA    | NA    | QT      | 0.000 | 0.000 | M    |
| PGS005004 | Body Height              | 0.281 | 0.310 | 0.906 | NA    | NA    | NA    | QT      | 0.000 | 0.000 | M    |
| PGS005005 | Body Height              | 0.289 | 0.320 | 0.901 | NA    | NA    | NA    | QT      | 0.000 | 0.000 | M    |
| PGS005006 | Body Height              | 0.278 | 0.312 | 0.891 | NA    | NA    | NA    | QT      | 0.000 | 0.000 | M    |
| PGS005007 | Body Height              | 0.367 | 0.407 | 0.901 | NA    | NA    | NA    | QT      | 0.000 | 0.000 | M    |
| PGS005008 | Systolic Blood Pressure  | 0.096 | 0.081 | 1.192 | NA    | NA    | NA    | QT      | 0.000 | 0.000 | F    |
| PGS005009 | Systolic Blood Pressure  | 0.192 | 0.167 | 1.153 | NA    | NA    | NA    | QT      | 0.000 | 0.000 | F    |
| PGS005010 | Systolic Blood Pressure  | 0.106 | 0.090 | 1.184 | NA    | NA    | NA    | QT      | 0.000 | 0.000 | F    |
| PGS005011 | Systolic Blood Pressure  | 0.181 | 0.154 | 1.172 | NA    | NA    | NA    | QT      | 0.000 | 0.000 | F    |
| PGS005012 | Systolic Blood Pressure  | 0.214 | 0.183 | 1.166 | NA    | NA    | NA    | QT      | 0.000 | 0.000 | F    |
| PGS005013 | Systolic Blood Pressure  | 0.224 | 0.194 | 1.160 | NA    | NA    | NA    | QT      | 0.000 | 0.000 | F    |
| PGS005014 | Systolic Blood Pressure  | 0.092 | 0.078 | 1.178 | NA    | NA    | NA    | QT      | 0.000 | 0.000 | F    |
| PGS005015 | Systolic Blood Pressure  | 0.223 | 0.192 | 1.159 | NA    | NA    | NA    | QT      | 0.000 | 0.000 | F    |
| PGS005016 | Systolic Blood Pressure  | 0.104 | 0.088 | 1.185 | NA    | NA    | NA    | QT      | 0.000 | 0.000 | F    |
| PGS005017 | Systolic Blood Pressure  | 0.142 | 0.120 | 1.190 | NA    | NA    | NA    | QT      | 0.000 | 0.000 | F    |
| PGS005018 | Systolic Blood Pressure  | 0.206 | 0.177 | 1.167 | NA    | NA    | NA    | QT      | 0.000 | 0.000 | F    |
| PGS005019 | Systolic Blood Pressure  | 0.216 | 0.184 | 1.173 | NA    | NA    | NA    | QT      | 0.000 | 0.000 | F    |
| PGS005020 | Systolic Blood Pressure  | 0.221 | 0.189 | 1.170 | NA    | NA    | NA    | QT      | 0.000 | 0.000 | F    |
| PGS005021 | Type 2 Diabetes Mellitus | 0.288 | 0.286 | 1.006 | 1.333 | 1.331 | 1.002 | Disease | 0.859 | 0.898 | None |
| PGS005022 | Type 2 Diabetes Mellitus | 0.546 | 0.523 | 1.044 | 1.726 | 1.686 | 1.023 | Disease | 0.033 | 0.054 | F    |
| PGS005023 | Type 2 Diabetes Mellitus | 0.321 | 0.310 | 1.035 | 1.378 | 1.363 | 1.011 | Disease | 0.299 | 0.394 | None |
| PGS005024 | Type 2 Diabetes Mellitus | 0.629 | 0.624 | 1.007 | 1.875 | 1.867 | 1.004 | Disease | 0.694 | 0.766 | None |
| PGS005025 | Type 2 Diabetes Mellitus | 0.579 | 0.579 | 1.000 | 1.784 | 1.784 | 1.000 | Disease | 0.987 | 0.990 | None |
| PGS005026 | Type 2 Diabetes Mellitus | 0.645 | 0.642 | 1.004 | 1.905 | 1.900 | 1.003 | Disease | 0.814 | 0.861 | None |
| PGS005027 | Type 2 Diabetes Mellitus | 0.238 | 0.247 | 0.963 | 1.268 | 1.280 | 0.991 | Disease | 0.369 | 0.469 | None |
| PGS005028 | Type 2 Diabetes Mellitus | 0.711 | 0.710 | 1.001 | 2.036 | 2.035 | 1.001 | Disease | 0.947 | 0.966 | None |
| PGS005029 | Type 2 Diabetes Mellitus | 0.301 | 0.295 | 1.019 | 1.351 | 1.344 | 1.006 | Disease | 0.584 | 0.671 | None |
| PGS005030 | Type 2 Diabetes Mellitus | 0.595 | 0.591 | 1.007 | 1.813 | 1.806 | 1.004 | Disease | 0.713 | 0.781 | None |
| PGS005031 | Type 2 Diabetes Mellitus | 0.644 | 0.643 | 1.001 | 1.903 | 1.902 | 1.001 | Disease | 0.935 | 0.958 | None |
| PGS005032 | Type 2 Diabetes Mellitus | 0.654 | 0.659 | 0.991 | 1.923 | 1.934 | 0.994 | Disease | 0.601 | 0.689 | None |
| PGS005033 | Type 2 Diabetes Mellitus | 0.706 | 0.711 | 0.993 | 2.026 | 2.036 | 0.995 | Disease | 0.637 | 0.719 | None |
| PGS005034 | Coronary Artery Disease  | 0.070 | 0.082 | 0.854 | 1.072 | 1.085 | 0.988 | Disease | 0.219 | 0.302 | None |
| PGS005035 | Coronary Artery Disease  | 0.303 | 0.372 | 0.814 | 1.354 | 1.451 | 0.933 | Disease | 0.000 | 0.000 | M    |
| PGS005036 | Coronary Artery Disease  | 0.116 | 0.134 | 0.868 | 1.124 | 1.144 | 0.982 | Disease | 0.068 | 0.106 | None |
| PGS005037 | Coronary Artery Disease  | 0.308 | 0.386 | 0.799 | 1.361 | 1.471 | 0.925 | Disease | 0.000 | 0.000 | M    |
| PGS005038 | Coronary Artery Disease  | 0.318 | 0.398 | 0.801 | 1.375 | 1.488 | 0.924 | Disease | 0.000 | 0.000 | M    |
| PGS005039 | Coronary Artery Disease  | 0.329 | 0.409 | 0.803 | 1.389 | 1.506 | 0.923 | Disease | 0.000 | 0.000 | M    |
| PGS005040 | Coronary Artery Disease  | 0.058 | 0.064 | 0.897 | 1.059 | 1.066 | 0.993 | Disease | 0.495 | 0.591 | None |
| PGS005041 | Coronary Artery Disease  | 0.320 | 0.410 | 0.781 | 1.377 | 1.507 | 0.914 | Disease | 0.000 | 0.000 | M    |
| PGS005042 | Coronary Artery Disease  | 0.096 | 0.111 | 0.866 | 1.101 | 1.118 | 0.985 | Disease | 0.124 | 0.184 | None |
| PGS005043 | Coronary Artery Disease  | 0.291 | 0.365 | 0.797 | 1.338 | 1.441 | 0.929 | Disease | 0.000 | 0.000 | M    |
| PGS005044 | Coronary Artery Disease  | 0.327 | 0.411 | 0.797 | 1.387 | 1.508 | 0.920 | Disease | 0.000 | 0.000 | M    |
| PGS005045 | Coronary Artery Disease  | 0.329 | 0.408 | 0.806 | 1.390 | 1.504 | 0.924 | Disease | 0.000 | 0.000 | M    |
| PGS005046 | Coronary Artery Disease  | 0.333 | 0.424 | 0.786 | 1.395 | 1.528 | 0.913 | Disease | 0.000 | 0.000 | M    |
| PGS005047 | Coronary Artery Disease  | 0.079 | 0.087 | 0.902 | 1.082 | 1.091 | 0.992 | Disease | 0.380 | 0.481 | None |
| PGS005048 | Coronary Artery Disease  | 0.306 | 0.362 | 0.847 | 1.358 | 1.436 | 0.946 | Disease | 0.000 | 0.000 | M    |
| PGS005049 | Coronary Artery Disease  | 0.113 | 0.127 | 0.892 | 1.119 | 1.135 | 0.986 | Disease | 0.157 | 0.226 | None |
| PGS005050 | Coronary Artery Disease  | 0.319 | 0.387 | 0.826 | 1.376 | 1.472 | 0.935 | Disease | 0.000 | 0.000 | M    |
| PGS005051 | Coronary Artery Disease  | 0.321 | 0.390 | 0.824 | 1.379 | 1.477 | 0.934 | Disease | 0.000 | 0.000 | M    |
| PGS005052 | Coronary Artery Disease  | 0.330 | 0.395 | 0.837 | 1.391 | 1.484 | 0.938 | Disease | 0.000 | 0.000 | M    |
| PGS005053 | Coronary Artery Disease  | 0.059 | 0.075 | 0.793 | 1.061 | 1.077 | 0.985 | Disease | 0.112 | 0.167 | None |
| PGS005054 | Coronary Artery Disease  | 0.302 | 0.373 | 0.809 | 1.352 | 1.451 | 0.931 | Disease | 0.000 | 0.000 | M    |
| PGS005055 | Coronary Artery Disease  | 0.105 | 0.113 | 0.929 | 1.110 | 1.119 | 0.992 | Disease | 0.409 | 0.512 | None |
| PGS005056 | Coronary Artery Disease  | 0.297 | 0.367 | 0.809 | 1.346 | 1.444 | 0.932 | Disease | 0.000 | 0.000 | M    |

|           |                         |       |       |       |       |       |       |         |       |       |      |
|-----------|-------------------------|-------|-------|-------|-------|-------|-------|---------|-------|-------|------|
| PGS005057 | Coronary Artery Disease | 0.322 | 0.398 | 0.810 | 1.380 | 1.488 | 0.927 | Disease | 0.000 | 0.000 | M    |
| PGS005058 | Coronary Artery Disease | 0.307 | 0.374 | 0.821 | 1.360 | 1.454 | 0.935 | Disease | 0.000 | 0.000 | M    |
| PGS005059 | Coronary Artery Disease | 0.332 | 0.417 | 0.796 | 1.394 | 1.518 | 0.918 | Disease | 0.000 | 0.000 | M    |
| PGS005060 | Atrial Fibrillation     | 0.159 | 0.192 | 0.831 | 1.173 | 1.211 | 0.968 | Disease | 0.003 | 0.006 | M    |
| PGS005061 | Atrial Fibrillation     | 0.482 | 0.501 | 0.962 | 1.619 | 1.651 | 0.981 | Disease | 0.091 | 0.139 | None |
| PGS005062 | Atrial Fibrillation     | 0.229 | 0.261 | 0.877 | 1.257 | 1.298 | 0.968 | Disease | 0.003 | 0.006 | M    |
| PGS005063 | Atrial Fibrillation     | 0.498 | 0.538 | 0.926 | 1.646 | 1.713 | 0.961 | Disease | 0.000 | 0.001 | M    |
| PGS005064 | Atrial Fibrillation     | 0.411 | 0.457 | 0.899 | 1.509 | 1.580 | 0.955 | Disease | 0.000 | 0.000 | M    |
| PGS005065 | Atrial Fibrillation     | 0.521 | 0.558 | 0.933 | 1.683 | 1.747 | 0.963 | Disease | 0.001 | 0.002 | M    |
| PGS005066 | Atrial Fibrillation     | 0.133 | 0.150 | 0.885 | 1.142 | 1.162 | 0.983 | Disease | 0.119 | 0.177 | None |
| PGS005067 | Atrial Fibrillation     | 0.557 | 0.599 | 0.931 | 1.746 | 1.820 | 0.959 | Disease | 0.000 | 0.001 | M    |
| PGS005068 | Atrial Fibrillation     | 0.159 | 0.186 | 0.854 | 1.172 | 1.204 | 0.973 | Disease | 0.014 | 0.024 | M    |
| PGS005069 | Atrial Fibrillation     | 0.481 | 0.530 | 0.908 | 1.618 | 1.699 | 0.952 | Disease | 0.000 | 0.000 | M    |
| PGS005070 | Atrial Fibrillation     | 0.527 | 0.578 | 0.911 | 1.693 | 1.783 | 0.950 | Disease | 0.000 | 0.000 | M    |
| PGS005071 | Atrial Fibrillation     | 0.550 | 0.595 | 0.926 | 1.734 | 1.812 | 0.957 | Disease | 0.000 | 0.000 | M    |
| PGS005072 | Atrial Fibrillation     | 0.542 | 0.599 | 0.905 | 1.720 | 1.821 | 0.944 | Disease | 0.000 | 0.000 | M    |

| Name                                             | Effect size Difference | SD    | P-value | P-value adjusted | Significant | Lower CI | Upper CI |
|--------------------------------------------------|------------------------|-------|---------|------------------|-------------|----------|----------|
| Testosterone Measurement                         | -0.129                 | 0.006 | 0.000   | 0.000            | TRUE        | -0.141   | -0.117   |
| Estradiol Measurement                            | 0.299                  | 0.016 | 0.000   | 0.000            | TRUE        | 0.268    | 0.330    |
| Monocyte Count                                   | -0.090                 | 0.006 | 0.000   | 0.000            | TRUE        | -0.101   | -0.079   |
| Grip Strength Measurement                        | -0.084                 | 0.005 | 0.000   | 0.000            | TRUE        | -0.094   | -0.073   |
| Basal Metabolic Rate Measurement                 | -0.068                 | 0.005 | 0.000   | 0.000            | TRUE        | -0.078   | -0.058   |
| Forced Expiratory Volume                         | -0.063                 | 0.005 | 0.000   | 0.000            | TRUE        | -0.073   | -0.054   |
| Creatinine Measurement                           | 0.072                  | 0.006 | 0.000   | 0.000            | TRUE        | 0.061    | 0.084    |
| Hypothyroidism                                   | 0.437                  | 0.036 | 0.000   | 0.000            | TRUE        | 0.367    | 0.507    |
| Coronary Artery Disease                          | -0.303                 | 0.026 | 0.000   | 0.000            | TRUE        | -0.354   | -0.252   |
| Triglyceride Measurement                         | -0.049                 | 0.005 | 0.000   | 0.000            | TRUE        | -0.058   | -0.039   |
| Glomerular Filtration Rate                       | 0.053                  | 0.006 | 0.000   | 0.000            | TRUE        | 0.042    | 0.064    |
| Waist Hip Ratio                                  | 0.045                  | 0.005 | 0.000   | 0.000            | TRUE        | 0.035    | 0.054    |
| Urate Measurement                                | 0.047                  | 0.005 | 0.000   | 0.000            | TRUE        | 0.036    | 0.057    |
| Peak Expiratory Flow                             | -0.049                 | 0.006 | 0.000   | 0.000            | TRUE        | -0.061   | -0.038   |
| C-Reactive Protein Measurement                   | 0.046                  | 0.006 | 0.000   | 0.000            | TRUE        | 0.035    | 0.058    |
| Leukocyte Count                                  | 0.041                  | 0.005 | 0.000   | 0.000            | TRUE        | 0.030    | 0.051    |
| Whole-Body Water Mass                            | -0.035                 | 0.005 | 0.000   | 0.000            | TRUE        | -0.045   | -0.026   |
| Alkaline Phosphatase Measurement                 | -0.041                 | 0.005 | 0.000   | 0.000            | TRUE        | -0.051   | -0.030   |
| HbA1c Measurement                                | -0.038                 | 0.005 | 0.000   | 0.000            | TRUE        | -0.049   | -0.028   |
| High-Density Lipoprotein Cholesterol Measurement | 0.031                  | 0.005 | 0.000   | 0.000            | TRUE        | 0.023    | 0.040    |
| Apolipoprotein B Measurement                     | 0.052                  | 0.008 | 0.000   | 0.000            | TRUE        | 0.037    | 0.067    |
| Urinary Microalbumin Measurement                 | -0.065                 | 0.011 | 0.000   | 0.000            | TRUE        | -0.086   | -0.043   |
| Cataract                                         | -0.109                 | 0.021 | 0.000   | 0.000            | TRUE        | -0.150   | -0.069   |
| Atrial Fibrillation                              | -0.153                 | 0.029 | 0.000   | 0.000            | TRUE        | -0.211   | -0.096   |
| Eosinophil Count                                 | -0.027                 | 0.005 | 0.000   | 0.000            | TRUE        | -0.038   | -0.017   |
| Glucose Measurement                              | -0.039                 | 0.008 | 0.000   | 0.000            | TRUE        | -0.054   | -0.024   |
| Lymphocyte Count                                 | 0.030                  | 0.006 | 0.000   | 0.000            | TRUE        | 0.018    | 0.042    |
| Type 2 Diabetes Mellitus                         | -0.177                 | 0.035 | 0.000   | 0.000            | TRUE        | -0.245   | -0.108   |
| Serum Alanine Aminotransferase Measurement       | -0.029                 | 0.006 | 0.000   | 0.000            | TRUE        | -0.040   | -0.017   |
| Lymphocyte Percentage of Leukocytes              | 0.025                  | 0.006 | 0.000   | 0.000            | TRUE        | 0.014    | 0.036    |
| Apolipoprotein A1 Measurement                    | 0.031                  | 0.007 | 0.000   | 0.000            | TRUE        | 0.017    | 0.046    |
| Phosphate Measurement                            | -0.025                 | 0.006 | 0.000   | 0.000            | TRUE        | -0.036   | -0.013   |
| Platelet Count                                   | 0.018                  | 0.005 | 0.000   | 0.000            | TRUE        | 0.009    | 0.027    |
| Mean Corpuscular Hemoglobin Concentration        | -0.024                 | 0.006 | 0.000   | 0.000            | TRUE        | -0.036   | -0.012   |
| Osteoarthritis                                   | -0.064                 | 0.017 | 0.000   | 0.000            | TRUE        | -0.097   | -0.032   |
| Serum Gamma-Glutamyl Transferase Measurement     | 0.022                  | 0.006 | 0.000   | 0.001            | TRUE        | 0.011    | 0.034    |

|                                                 |        |       |       |       |       |        |        |
|-------------------------------------------------|--------|-------|-------|-------|-------|--------|--------|
| Liver Fat Measurement                           | -0.087 | 0.024 | 0.000 | 0.002 | TRUE  | -0.135 | -0.039 |
| Hypertension                                    | 0.071  | 0.020 | 0.000 | 0.002 | TRUE  | 0.031  | 0.110  |
| Bone Density                                    | 0.019  | 0.006 | 0.001 | 0.004 | TRUE  | 0.008  | 0.030  |
| Urinary Bladder Carcinoma                       | 0.204  | 0.062 | 0.001 | 0.004 | TRUE  | 0.083  | 0.325  |
| Diastolic Blood Pressure                        | 0.016  | 0.005 | 0.001 | 0.004 | TRUE  | 0.007  | 0.026  |
| Dementia                                        | 0.132  | 0.042 | 0.002 | 0.007 | TRUE  | 0.048  | 0.215  |
| Birth Weight                                    | 0.022  | 0.008 | 0.003 | 0.011 | TRUE  | 0.008  | 0.037  |
| Urinary Potassium Measurement                   | 0.018  | 0.006 | 0.004 | 0.011 | TRUE  | 0.006  | 0.029  |
| Type 1 Diabetes Mellitus                        | 0.174  | 0.060 | 0.004 | 0.011 | TRUE  | 0.057  | 0.292  |
| Low-Density Lipoprotein Cholesterol Measurement | -0.015 | 0.005 | 0.004 | 0.014 | TRUE  | -0.025 | -0.005 |
| Chronic Kidney Disease                          | 0.080  | 0.029 | 0.006 | 0.018 | TRUE  | 0.023  | 0.137  |
| Serum Albumin Measurement                       | 0.016  | 0.006 | 0.006 | 0.018 | TRUE  | 0.005  | 0.027  |
| Neutrophil Count                                | 0.015  | 0.005 | 0.006 | 0.019 | TRUE  | 0.004  | 0.026  |
| Inguinal Hernia                                 | -0.137 | 0.051 | 0.007 | 0.021 | TRUE  | -0.238 | -0.037 |
| Fat Body Mass                                   | 0.013  | 0.005 | 0.008 | 0.023 | TRUE  | 0.003  | 0.023  |
| IGF-1 Measurement                               | -0.013 | 0.005 | 0.012 | 0.033 | TRUE  | -0.023 | -0.003 |
| Urea Measurement                                | -0.014 | 0.006 | 0.013 | 0.034 | TRUE  | -0.025 | -0.003 |
| Body Height                                     | -0.008 | 0.003 | 0.017 | 0.045 | TRUE  | -0.014 | -0.001 |
| Venous Thromboembolism                          | 0.072  | 0.030 | 0.018 | 0.046 | TRUE  | 0.013  | 0.132  |
| Basophil Count                                  | 0.015  | 0.006 | 0.018 | 0.046 | TRUE  | 0.003  | 0.027  |
| Ankylosing Spondylitis                          | -0.173 | 0.074 | 0.019 | 0.047 | TRUE  | -0.318 | -0.029 |
| Asthma                                          | 0.066  | 0.028 | 0.019 | 0.047 | TRUE  | 0.011  | 0.122  |
| Hypercholesterolemia                            | -0.045 | 0.020 | 0.024 | 0.058 | FALSE | -0.085 | -0.006 |
| Pulmonary Embolism                              | -0.088 | 0.039 | 0.024 | 0.058 | FALSE | -0.165 | -0.012 |
| Colorectal Cancer                               | -0.099 | 0.045 | 0.029 | 0.070 | FALSE | -0.188 | -0.010 |
| Calcium Measurement                             | -0.013 | 0.006 | 0.033 | 0.076 | FALSE | -0.024 | -0.001 |
| Erythrocyte Count                               | -0.010 | 0.005 | 0.033 | 0.076 | FALSE | -0.019 | -0.001 |
| Varicose Veins                                  | 0.081  | 0.038 | 0.034 | 0.076 | FALSE | 0.006  | 0.155  |
| Melanoma                                        | 0.106  | 0.051 | 0.040 | 0.089 | FALSE | 0.005  | 0.206  |
| Mean Corpuscular Volume                         | -0.011 | 0.005 | 0.041 | 0.089 | FALSE | -0.021 | 0.000  |
| Red Cell Distribution Width                     | -0.011 | 0.006 | 0.049 | 0.107 | FALSE | -0.023 | 0.000  |
| Insomnia                                        | 0.082  | 0.043 | 0.054 | 0.114 | FALSE | -0.001 | 0.165  |
| Multiple Myeloma                                | -0.182 | 0.095 | 0.054 | 0.114 | FALSE | -0.368 | 0.003  |
| Psoriasis                                       | -0.068 | 0.037 | 0.066 | 0.136 | FALSE | -0.140 | 0.004  |
| Sleep Apnea                                     | -0.056 | 0.032 | 0.078 | 0.157 | FALSE | -0.118 | 0.006  |
| Glaucoma                                        | -0.072 | 0.041 | 0.078 | 0.157 | FALSE | -0.152 | 0.008  |
| Bilirubin Measurement                           | 0.010  | 0.006 | 0.080 | 0.159 | FALSE | -0.001 | 0.021  |

|                                            |        |       |       |       |       |        |       |
|--------------------------------------------|--------|-------|-------|-------|-------|--------|-------|
| Systolic Blood Pressure                    | -0.008 | 0.005 | 0.082 | 0.160 | FALSE | -0.017 | 0.001 |
| Adipose Tissue Measurement                 | -0.082 | 0.047 | 0.083 | 0.160 | FALSE | -0.174 | 0.011 |
| Lipoprotein(a) Measurement                 | -0.007 | 0.004 | 0.086 | 0.163 | FALSE | -0.016 | 0.001 |
| Body Weight                                | -0.009 | 0.005 | 0.086 | 0.163 | FALSE | -0.019 | 0.001 |
| Diabetic Retinopathy                       | -0.101 | 0.060 | 0.093 | 0.173 | FALSE | -0.220 | 0.017 |
| Alzheimer's Disease                        | 0.113  | 0.068 | 0.097 | 0.177 | FALSE | -0.020 | 0.245 |
| Eosinophil Percentage of Leukocytes        | -0.009 | 0.006 | 0.098 | 0.177 | FALSE | -0.020 | 0.002 |
| Crohn's Disease                            | 0.130  | 0.080 | 0.107 | 0.191 | FALSE | -0.028 | 0.287 |
| Basophil Percentage of Leukocytes          | 0.010  | 0.006 | 0.121 | 0.215 | FALSE | -0.003 | 0.022 |
| Platelet Component Distribution Width      | -0.008 | 0.005 | 0.135 | 0.236 | FALSE | -0.018 | 0.002 |
| Diverticular Disease                       | 0.032  | 0.022 | 0.144 | 0.249 | FALSE | -0.011 | 0.076 |
| Migraine Disorder                          | 0.079  | 0.054 | 0.147 | 0.251 | FALSE | -0.028 | 0.185 |
| Smoking Status Measurement                 | 0.032  | 0.023 | 0.158 | 0.266 | FALSE | -0.012 | 0.077 |
| Stroke                                     | -0.051 | 0.037 | 0.160 | 0.267 | FALSE | -0.123 | 0.020 |
| Alcohol Consumption Measurement            | 0.021  | 0.016 | 0.192 | 0.317 | FALSE | -0.011 | 0.052 |
| Mean Reticulocyte Volume                   | -0.007 | 0.006 | 0.206 | 0.333 | FALSE | -0.018 | 0.004 |
| Spondylosis                                | -0.039 | 0.031 | 0.207 | 0.333 | FALSE | -0.099 | 0.021 |
| Inflammatory Bowel Disease                 | 0.058  | 0.049 | 0.239 | 0.380 | FALSE | -0.038 | 0.154 |
| Gout                                       | 0.066  | 0.059 | 0.264 | 0.416 | FALSE | -0.050 | 0.183 |
| Heart Failure                              | -0.035 | 0.033 | 0.282 | 0.439 | FALSE | -0.099 | 0.029 |
| PR Interval                                | -0.020 | 0.019 | 0.284 | 0.439 | FALSE | -0.056 | 0.017 |
| QT Interval                                | 0.019  | 0.018 | 0.288 | 0.439 | FALSE | -0.016 | 0.054 |
| Neutrophil Percentage of Leukocytes        | -0.006 | 0.006 | 0.299 | 0.452 | FALSE | -0.017 | 0.005 |
| Abdominal Aortic Aneurysm                  | -0.077 | 0.075 | 0.303 | 0.452 | FALSE | -0.224 | 0.070 |
| Bipolar Disorder                           | 0.102  | 0.100 | 0.308 | 0.456 | FALSE | -0.094 | 0.299 |
| Platelet Crit                              | 0.005  | 0.005 | 0.321 | 0.471 | FALSE | -0.005 | 0.015 |
| Vitiligo                                   | -0.356 | 0.370 | 0.336 | 0.487 | FALSE | -1.082 | 0.369 |
| Systemic Lupus Erythematosus               | 0.156  | 0.163 | 0.341 | 0.489 | FALSE | -0.164 | 0.476 |
| Reticulocyte Count                         | 0.005  | 0.006 | 0.359 | 0.511 | FALSE | -0.006 | 0.017 |
| Non-Hodgkin's Lymphoma                     | 0.111  | 0.124 | 0.369 | 0.519 | FALSE | -0.131 | 0.354 |
| Colon Carcinoma                            | -0.039 | 0.044 | 0.378 | 0.526 | FALSE | -0.125 | 0.048 |
| Vitamin B12 Measurement                    | 0.008  | 0.009 | 0.384 | 0.530 | FALSE | -0.009 | 0.024 |
| Chronic Lymphocytic Leukemia               | 0.107  | 0.125 | 0.392 | 0.536 | FALSE | -0.138 | 0.352 |
| Immature Reticulocyte Fraction Measurement | -0.005 | 0.006 | 0.403 | 0.546 | FALSE | -0.016 | 0.006 |
| Brain Cancer                               | -0.098 | 0.124 | 0.433 | 0.581 | FALSE | -0.341 | 0.146 |
| Renal Carcinoma                            | 0.064  | 0.089 | 0.474 | 0.631 | FALSE | -0.110 | 0.238 |
| Schizophrenia                              | -0.096 | 0.139 | 0.490 | 0.642 | FALSE | -0.368 | 0.176 |

|                                                |        |       |       |       |       |        |       |
|------------------------------------------------|--------|-------|-------|-------|-------|--------|-------|
| Ulcerative Colitis                             | -0.045 | 0.065 | 0.492 | 0.642 | FALSE | -0.172 | 0.083 |
| Monocyte Percentage of Leukocytes              | 0.004  | 0.006 | 0.504 | 0.652 | FALSE | -0.007 | 0.015 |
| Hippocampal Volume                             | 0.009  | 0.014 | 0.508 | 0.652 | FALSE | -0.018 | 0.036 |
| Gastroesophageal Reflux Disease                | -0.012 | 0.019 | 0.522 | 0.659 | FALSE | -0.050 | 0.025 |
| Intraocular Pressure Measurement               | -0.008 | 0.013 | 0.527 | 0.659 | FALSE | -0.034 | 0.018 |
| QRS Duration                                   | -0.010 | 0.016 | 0.530 | 0.659 | FALSE | -0.041 | 0.021 |
| Total Cholesterol Measurement                  | 0.004  | 0.007 | 0.535 | 0.659 | FALSE | -0.009 | 0.018 |
| Body Mass Index                                | 0.003  | 0.004 | 0.543 | 0.659 | FALSE | -0.006 | 0.011 |
| Multiple Sclerosis                             | -0.056 | 0.093 | 0.545 | 0.659 | FALSE | -0.239 | 0.126 |
| Lung Carcinoma                                 | -0.032 | 0.052 | 0.545 | 0.659 | FALSE | -0.134 | 0.071 |
| Non-Alcoholic Fatty Liver Disease              | -0.025 | 0.044 | 0.560 | 0.671 | FALSE | -0.111 | 0.060 |
| Vitamin D Measurement                          | 0.003  | 0.005 | 0.574 | 0.683 | FALSE | -0.007 | 0.013 |
| Osteoporosis                                   | -0.022 | 0.040 | 0.582 | 0.686 | FALSE | -0.100 | 0.056 |
| Brain Volume Measurement (Neuroimaging)        | -0.009 | 0.017 | 0.599 | 0.700 | FALSE | -0.043 | 0.025 |
| Chronic Obstructive Pulmonary Disease          | 0.016  | 0.032 | 0.605 | 0.702 | FALSE | -0.046 | 0.079 |
| Mean Platelet Volume                           | 0.002  | 0.004 | 0.650 | 0.747 | FALSE | -0.006 | 0.010 |
| Eczema                                         | -0.107 | 0.243 | 0.658 | 0.752 | FALSE | -0.584 | 0.369 |
| Obesity                                        | 0.011  | 0.026 | 0.677 | 0.766 | FALSE | -0.040 | 0.061 |
| Left Ventricular Ejection Fraction Measurement | 0.026  | 0.062 | 0.681 | 0.766 | FALSE | -0.097 | 0.148 |
| Pancreatic Carcinoma                           | -0.039 | 0.100 | 0.694 | 0.774 | FALSE | -0.235 | 0.156 |
| Skin Carcinoma                                 | 0.010  | 0.026 | 0.715 | 0.789 | FALSE | -0.042 | 0.061 |
| Esophageal Cancer                              | 0.022  | 0.061 | 0.718 | 0.789 | FALSE | -0.098 | 0.142 |
| Total Blood Protein Measurement                | -0.002 | 0.006 | 0.727 | 0.792 | FALSE | -0.013 | 0.009 |
| Cholecystitis                                  | 0.011  | 0.034 | 0.739 | 0.800 | FALSE | -0.055 | 0.078 |
| Reticulocyte Measurement                       | 0.002  | 0.006 | 0.771 | 0.828 | FALSE | -0.010 | 0.014 |
| Cystatin C Measurement                         | -0.001 | 0.005 | 0.779 | 0.830 | FALSE | -0.011 | 0.008 |
| Celiac Disease                                 | 0.021  | 0.082 | 0.795 | 0.836 | FALSE | -0.139 | 0.181 |
| Age-Related Macular Degeneration               | 0.011  | 0.042 | 0.796 | 0.836 | FALSE | -0.072 | 0.094 |
| Mean Corpuscular Hemoglobin                    | 0.001  | 0.005 | 0.815 | 0.850 | FALSE | -0.009 | 0.011 |
| Parkinson's Disease                            | 0.015  | 0.067 | 0.822 | 0.851 | FALSE | -0.116 | 0.146 |
| Rheumatoid Arthritis                           | -0.010 | 0.047 | 0.837 | 0.856 | FALSE | -0.101 | 0.082 |
| Aspartate Aminotransferase Measurement         | -0.001 | 0.006 | 0.838 | 0.856 | FALSE | -0.013 | 0.011 |
| Thyroid Carcinoma                              | -0.025 | 0.157 | 0.875 | 0.887 | FALSE | -0.333 | 0.283 |
| Hodgkin's Lymphoma                             | -0.006 | 0.088 | 0.946 | 0.953 | FALSE | -0.178 | 0.166 |
| Red Blood Cell Distribution Width              | 0.000  | 0.005 | 0.972 | 0.972 | FALSE | -0.010 | 0.011 |

| PGS catalog ID | Trait                                            | Total sample size number | Male sample size number | Female sample size number | Total case number | Total control number | Male case number | Female case number | Male control number | Female control number |
|----------------|--------------------------------------------------|--------------------------|-------------------------|---------------------------|-------------------|----------------------|------------------|--------------------|---------------------|-----------------------|
| PGS000010      | Coronary Artery Disease                          | 86995                    | 42490                   | 44505                     | 22233             | 64762                | 15369            | 6864               | 27121               | 37641                 |
| PGS000014      | Type 2 Diabetes Mellitus                         | 318416                   | 69986                   | 88622                     | 25713             | 70923                | 12388            | 13325              | 57598               | 75297                 |
| PGS000016      | Atrial Fibrillation                              | 132118                   | 61100                   | 71018                     | 22093             | 110025               | 11879            | 10214              | 49221               | 60804                 |
| PGS000023      | Type 1 Diabetes Mellitus                         | 3949                     | 1234                    | 2715                      | 1021              | 2928                 | 390              | 631                | 844                 | 2084                  |
| PGS000058      | Coronary Artery Disease                          | 1472359                  | 44428                   | 43005                     | 247506            | 526240               | 5538             | 5360               | 38890               | 37645                 |
| PGS000064      | High-Density Lipoprotein Cholesterol Measurement | 331368                   | 162345                  | 169023                    | NA                | NA                   | NA               | NA                 | NA                  | NA                    |
| PGS000065      | Low-Density Lipoprotein Cholesterol Measurement  | 331368                   | 162345                  | 169023                    | NA                | NA                   | NA               | NA                 | NA                  | NA                    |
| PGS000066      | Triglyceride Measurement                         | 331368                   | 162345                  | 169023                    | NA                | NA                   | NA               | NA                 | NA                  | NA                    |
| PGS000088      | Basophil Count                                   | 404718                   | 186170                  | 218548                    | NA                | NA                   | NA               | NA                 | NA                  | NA                    |
| PGS000089      | Basophil Percentage of Leukocytes                | 404532                   | 186085                  | 218447                    | NA                | NA                   | NA               | NA                 | NA                  | NA                    |
| PGS000090      | Eosinophil Count                                 | 406470                   | 186976                  | 219494                    | NA                | NA                   | NA               | NA                 | NA                  | NA                    |
| PGS000091      | Eosinophil Percentage of Leukocytes              | 406417                   | 186952                  | 219465                    | NA                | NA                   | NA               | NA                 | NA                  | NA                    |
| PGS000094      | Reticulocyte Count                               | 400334                   | 184154                  | 216180                    | NA                | NA                   | NA               | NA                 | NA                  | NA                    |
| PGS000095      | Reticulocyte Count                               | 400438                   | 184201                  | 216237                    | NA                | NA                   | NA               | NA                 | NA                  | NA                    |
| PGS000096      | Reticulocyte Count                               | 396408                   | 182348                  | 214060                    | NA                | NA                   | NA               | NA                 | NA                  | NA                    |
| PGS000097      | Lymphocyte Count                                 | 407277                   | 187347                  | 219930                    | NA                | NA                   | NA               | NA                 | NA                  | NA                    |
| PGS000098      | Lymphocyte Percentage of Leukocytes              | 407319                   | 187367                  | 219952                    | NA                | NA                   | NA               | NA                 | NA                  | NA                    |
| PGS000099      | Mean Corpuscular Hemoglobin                      | 406517                   | 186998                  | 219519                    | NA                | NA                   | NA               | NA                 | NA                  | NA                    |
| PGS000100      | Mean Corpuscular Hemoglobin Concentration        | 407850                   | 187611                  | 220239                    | NA                | NA                   | NA               | NA                 | NA                  | NA                    |
| PGS000102      | Monocyte Count                                   | 403994                   | 185837                  | 218157                    | NA                | NA                   | NA               | NA                 | NA                  | NA                    |
| PGS000103      | Monocyte Percentage of Leukocytes                | 403136                   | 185443                  | 217693                    | NA                | NA                   | NA               | NA                 | NA                  | NA                    |
| PGS000104      | Mean Platelet Volume                             | 391598                   | 180135                  | 211463                    | NA                | NA                   | NA               | NA                 | NA                  | NA                    |
| PGS000105      | Neutrophil Count                                 | 406788                   | 187122                  | 219666                    | NA                | NA                   | NA               | NA                 | NA                  | NA                    |
| PGS000106      | Neutrophil Percentage of Leukocytes              | 407114                   | 187272                  | 219842                    | NA                | NA                   | NA               | NA                 | NA                  | NA                    |
| PGS000107      | Platelet Crit                                    | 390803                   | 179769                  | 211034                    | NA                | NA                   | NA               | NA                 | NA                  | NA                    |
| PGS000108      | Platelet Component Distribution Width            | 391450                   | 180067                  | 211383                    | NA                | NA                   | NA               | NA                 | NA                  | NA                    |
| PGS000109      | Platelet Count                                   | 391232                   | 179967                  | 211265                    | NA                | NA                   | NA               | NA                 | NA                  | NA                    |
| PGS000110      | Erythrocyte Count                                | 408069                   | 187712                  | 220357                    | NA                | NA                   | NA               | NA                 | NA                  | NA                    |
| PGS000111      | Reticulocyte Count                               | 396720                   | 182491                  | 214229                    | NA                | NA                   | NA               | NA                 | NA                  | NA                    |
| PGS000112      | Reticulocyte Count                               | 396811                   | 182533                  | 214278                    | NA                | NA                   | NA               | NA                 | NA                  | NA                    |
| PGS000113      | Leukocyte Count                                  | 408032                   | 187695                  | 220337                    | NA                | NA                   | NA               | NA                 | NA                  | NA                    |
| PGS000314      | C-Reactive Protein Measurement                   | 204402                   | 92771                   | 113387                    | NA                | NA                   | NA               | NA                 | NA                  | NA                    |
| PGS000316      | Celiac Disease                                   | 25570                    | 9144                    | 14792                     | 13110             | 12460                | 4590             | 7426               | 4553                | 7367                  |
| PGS000320      | Body Mass Index                                  | 238944                   | 105548                  | 133396                    | NA                | NA                   | NA               | NA                 | NA                  | NA                    |
| PGS000321      | Testosterone Measurement                         | 229120                   | 115507                  | 113613                    | NA                | NA                   | NA               | NA                 | NA                  | NA                    |
| PGS000330      | Type 2 Diabetes Mellitus                         | 898130                   | 425613                  | 464389                    | 74124             | 824006               | 41846            | 30053              | 383767              | 434336                |
| PGS000337      | Coronary Artery Disease                          | 652352                   | 90221                   | 78007                     | 25892             | 142336               | 13886            | 12006              | 76335               | 66001                 |
| PGS000658      | Total Cholesterol Measurement                    | 128305                   | 70568                   | 57737                     | NA                | NA                   | NA               | NA                 | NA                  | NA                    |
| PGS000659      | Triglyceride Measurement                         | 105597                   | 59029                   | 46568                     | NA                | NA                   | NA               | NA                 | NA                  | NA                    |
| PGS000660      | High-Density Lipoprotein Cholesterol Measurement | 70657                    | 40557                   | 30100                     | NA                | NA                   | NA               | NA                 | NA                  | NA                    |
| PGS000661      | Low-Density Lipoprotein Cholesterol Measurement  | 72866                    | 41679                   | 31187                     | NA                | NA                   | NA               | NA                 | NA                  | NA                    |
| PGS000730      | Skin Carcinoma                                   | 103008                   | 43881                   | 59127                     | 14898             | 88110                | 6347             | 8551               | 37535               | 50575                 |
| PGS000731      | Skin Carcinoma                                   | 103008                   | 43881                   | 59127                     | 7479              | 95529                | 3186             | 4293               | 40695               | 54834                 |
| PGS000732      | Melanoma                                         | 103008                   | 43881                   | 59127                     | 3998              | 99010                | 1703             | 2295               | 42178               | 56832                 |
| PGS000740      | Lung Carcinoma                                   | 308645                   | 6201                    | 4679                      | 19991             | 40338                | 2943             | 2221               | 3258                | 2458                  |
| PGS000753      | Abdominal Aortic Aneurysm                        | 179814                   | 166652                  | 13162                     | 7642              | 172172               | 7083             | 559                | 159569              | 12603                 |
| PGS000758      | Body Height                                      | 607346                   | 162867                  | 191191                    | NA                | NA                   | NA               | NA                 | NA                  | NA                    |
| PGS000771      | Systemic Lupus Erythematosus                     | 184331                   | 7033                    | 17849                     | 36260             | 76057                | 2557             | 7291               | 4476                | 10558                 |
| PGS000772      | Systemic Lupus Erythematosus                     | 184331                   | 7033                    | 17849                     | 36260             | 76057                | 2557             | 7291               | 4476                | 10558                 |
| PGS000779      | Alzheimer's Disease                              | 147484                   | 5326                    | 7329                      | 8117              | 5088                 | 3282             | 4517               | 2044                | 2812                  |
| PGS000811      | Alzheimer's Disease                              | 644112                   | 299284                  | 344828                    | 78709             | 565403               | 34968            | 43741              | 264314              | 301089                |
| PGS000819      | Diabetic Retinopathy                             | 17587                    | 10928                   | 6639                      | 866               | 16701                | 539              | 327                | 10390               | 6311                  |
| PGS000872      | Non-Alcoholic Fatty Liver Disease                | 64002                    | 19548                   | 26996                     | NA                | NA                   | NA               | NA                 | NA                  | NA                    |
| PGS000876      | Alzheimer's Disease                              | 43708                    | 17776                   | 25932                     | 13831             | 29877                | 5625             | 8206               | 12151               | 17726                 |
| PGS000899      | Coronary Artery Disease                          | 1716874                  | 6596                    | 3902                      | 88192             | 162544               | 2594             | 1535               | 4002                | 2367                  |
| PGS001354      | Thyroid Carcinoma                                | 8786                     | 4323                    | 4463                      | 186               | 8600                 | NA               | NA                 | NA                  | NA                    |
| PGS001773      | Eczema                                           | 2688                     | 1183                    | 1505                      | 222               | 2466                 | 98               | 124                | 1085                | 1381                  |
| PGS002243      | Type 2 Diabetes Mellitus                         | 158608                   | 69986                   | 88622                     | 26201             | 132407               | 12655            | 13546              | 57331               | 75076                 |
| PGS002248      | Asthma                                           | 314633                   | 149750                  | 164883                    | 13962             | 300671               | 7833             | 6129               | 141917              | 158754                |
| PGS002249      | Alzheimer's Disease                              | 54162                    | 22476                   | 31686                     | 17008             | 37154                | 6581             | 10427              | 15895               | 21259                 |
| PGS002251      | Body Mass Index                                  | 238944                   | 105548                  | 133396                    | NA                | NA                   | NA               | NA                 | NA                  | NA                    |
| PGS002265      | Colorectal Cancer                                | 120184                   | 62496                   | 57688                     | 55105             | 65079                | NA               | NA                 | NA                  | NA                    |
| PGS002269      | Age-Related Macular Degeneration                 | 33976                    | 14304                   | 19672                     | 16144             | 17832                | 6458             | 9686               | 7846                | 9986                  |
| PGS002276      | QT Interval                                      | 84630                    | 41130                   | 43500                     | NA                | NA                   | NA               | NA                 | NA                  | NA                    |
| PGS002279      | Left Ventricular Ejection Fraction Measurement   | 36041                    | 16966                   | 19075                     | NA                | NA                   | NA               | NA                 | NA                  | NA                    |
| PGS002282      | Non-Alcoholic Fatty Liver Disease                | 218595                   | 201687                  | 16908                     | 90408             | 128187               | 81015            | 9393               | 120672              | 7515                  |
| PGS002283      | Non-Alcoholic Fatty Liver Disease                | 218595                   | 201687                  | 16908                     | 90408             | 128187               | 81015            | 9393               | 120672              | 7515                  |
| PGS002284      | High-Density Lipoprotein Cholesterol Measurement | 312571                   | 287565                  | 25006                     | NA                | NA                   | NA               | NA                 | NA                  | NA                    |
| PGS002285      | Low-Density Lipoprotein Cholesterol Measurement  | 312571                   | 287565                  | 25006                     | NA                | NA                   | NA               | NA                 | NA                  | NA                    |
| PGS002286      | Total Cholesterol Measurement                    | 312571                   | 287565                  | 25006                     | NA                | NA                   | NA               | NA                 | NA                  | NA                    |
| PGS002287      | Triglyceride Measurement                         | 312571                   | 287565                  | 25006                     | NA                | NA                   | NA               | NA                 | NA                  | NA                    |
| PGS002289      | Alzheimer's Disease                              | 54162                    | 22436                   | 31726                     | 17008             | 37154                | 6581             | 10427              | 15855               | 21299                 |
| PGS002301      | Melanoma                                         | 291407                   | 157104                  | 134303                    | 4842              | 286565               | 2587             | 2255               | 154517              | 132048                |
| PGS002303      | Non-Hodgkin's Lymphoma                           | 11523                    | 4226                    | 7666                      | 3857              | 7666                 | 1968             | 1889               | 5329                | 2337                  |
| PGS002304      | Non-Hodgkin's Lymphoma                           | 10486                    | 6484                    | 4002                      | 2728              | 7758                 | 1276             | 1452               | 5208                | 2550                  |
| PGS002731      | Alzheimer's Disease                              | 291                      | 113                     | 178                       | 83                | 208                  | 35               | 48                 | 78                  | 130                   |

|           |                                                  |        |        |        |        |        |       |       |        |        |
|-----------|--------------------------------------------------|--------|--------|--------|--------|--------|-------|-------|--------|--------|
| PGS002732 | Serum Alanine Aminotransferase Measurement       | 218595 | 201687 | 16908  | 128187 | 90408  | 81015 | 9393  | 120672 | 7515   |
| PGS002860 | C-Reactive Protein Measurement                   | 9541   | 4191   | 5350   | NA     | NA     | NA    | NA    | NA     | NA     |
| PGS002861 | C-Reactive Protein Measurement                   | 9541   | 4191   | 5350   | NA     | NA     | NA    | NA    | NA     | NA     |
| PGS002862 | C-Reactive Protein Measurement                   | 9541   | 4191   | 5350   | NA     | NA     | NA    | NA    | NA     | NA     |
| PGS002863 | C-Reactive Protein Measurement                   | 9541   | 4191   | 5350   | NA     | NA     | NA    | NA    | NA     | NA     |
| PGS002879 | C-Reactive Protein Measurement                   | 9541   | 4191   | 5350   | NA     | NA     | NA    | NA    | NA     | NA     |
| PGS002880 | C-Reactive Protein Measurement                   | 9541   | 4191   | 5350   | NA     | NA     | NA    | NA    | NA     | NA     |
| PGS002881 | C-Reactive Protein Measurement                   | 9541   | 4191   | 5350   | NA     | NA     | NA    | NA    | NA     | NA     |
| PGS002882 | C-Reactive Protein Measurement                   | 9541   | 4191   | 5350   | NA     | NA     | NA    | NA    | NA     | NA     |
| PGS002883 | C-Reactive Protein Measurement                   | 9541   | 4191   | 5350   | NA     | NA     | NA    | NA    | NA     | NA     |
| PGS003329 | Gout                                             | 332370 | 149784 | 162766 | 7131   | 325239 | 6210  | 522   | 143574 | 162244 |
| PGS003334 | Dementia                                         | 63926  | 63926  | 63926  | 21982  | 41944  | 8499  | 13483 | 18002  | 23942  |
| PGS003335 | Urinary Bladder Carcinoma                        | 36139  | 15605  | 20535  | 1803   | 34336  | 1435  | 369   | 14169  | 20167  |
| PGS003395 | Colorectal Cancer                                | 324079 | 160986 | 163070 | 35145  | 288934 | 19477 | 15668 | 141509 | 147402 |
| PGS003400 | Obesity                                          | 238944 | 105548 | 133396 | NA     | NA     | NA    | NA    | NA     | NA     |
| PGS003402 | Type 2 Diabetes Mellitus                         | 110452 | 54668  | 55787  | 26488  | 83964  | 14326 | 12164 | 40342  | 43623  |
| PGS003404 | Low-Density Lipoprotein Cholesterol Measurement  | 19840  | 9596   | 10244  | NA     | NA     | NA    | NA    | NA     | NA     |
| PGS003413 | Intraocular Pressure Measurement                 | 110260 | 50720  | 59540  | NA     | NA     | NA    | NA    | NA     | NA     |
| PGS003491 | Apolipoprotein A1 Measurement                    | 321783 | 151238 | 170545 | NA     | NA     | NA    | NA    | NA     | NA     |
| PGS003492 | Apolipoprotein B Measurement                     | 351810 | 161833 | 189977 | NA     | NA     | NA    | NA    | NA     | NA     |
| PGS003494 | Birth Weight                                     | 209524 | 81714  | 127810 | NA     | NA     | NA    | NA    | NA     | NA     |
| PGS003495 | Total Cholesterol Measurement                    | 353553 | 162634 | 190919 | NA     | NA     | NA    | NA    | NA     | NA     |
| PGS003498 | Diastolic Blood Pressure                         | 346303 | 159299 | 187004 | NA     | NA     | NA    | NA    | NA     | NA     |
| PGS003499 | PR Interval                                      | 18147  | 8892   | 9255   | NA     | NA     | NA    | NA    | NA     | NA     |
| PGS003500 | QT Interval                                      | 19119  | 9368   | 9751   | NA     | NA     | NA    | NA    | NA     | NA     |
| PGS003501 | QT Interval                                      | 19078  | 9348   | 9730   | NA     | NA     | NA    | NA    | NA     | NA     |
| PGS003502 | Erythrocyte Count                                | 359787 | 165502 | 194285 | NA     | NA     | NA    | NA    | NA     | NA     |
| PGS003503 | Red Cell Distribution Width                      | 359224 | 165224 | 193981 | NA     | NA     | NA    | NA    | NA     | NA     |
| PGS003509 | Fat Body Mass                                    | 364224 | 167543 | 196681 | NA     | NA     | NA    | NA    | NA     | NA     |
| PGS003513 | Grip Strength Measurement                        | 368658 | 169583 | 199075 | NA     | NA     | NA    | NA    | NA     | NA     |
| PGS003514 | Body Height                                      | 370120 | 170255 | 199865 | NA     | NA     | NA    | NA    | NA     | NA     |
| PGS003515 | Reticulocyte Measurement                         | 353933 | 162809 | 191124 | NA     | NA     | NA    | NA    | NA     | NA     |
| PGS003517 | Low-Density Lipoprotein Cholesterol Measurement  | 352884 | 162327 | 190557 | NA     | NA     | NA    | NA    | NA     | NA     |
| PGS003521 | Alkaline Phosphatase Measurement                 | 353576 | 162645 | 190931 | NA     | NA     | NA    | NA    | NA     | NA     |
| PGS003522 | Serum Alanine Aminotransferase Measurement       | 353432 | 162579 | 190853 | NA     | NA     | NA    | NA    | NA     | NA     |
| PGS003523 | Aspartate Aminotransferase Measurement           | 352236 | 162029 | 190207 | NA     | NA     | NA    | NA    | NA     | NA     |
| PGS003524 | Bilirubin Measurement                            | 352063 | 161949 | 190114 | NA     | NA     | NA    | NA    | NA     | NA     |
| PGS003525 | Body Mass Index                                  | 369738 | 170079 | 199659 | NA     | NA     | NA    | NA    | NA     | NA     |
| PGS003526 | Creatinine Measurement                           | 353378 | 162554 | 190824 | NA     | NA     | NA    | NA    | NA     | NA     |
| PGS003527 | C-Reactive Protein Measurement                   | 352775 | 162277 | 190499 | NA     | NA     | NA    | NA    | NA     | NA     |
| PGS003528 | Cystatin C Measurement                           | 353524 | 162621 | 190903 | NA     | NA     | NA    | NA    | NA     | NA     |
| PGS003529 | QRS Duration                                     | 28486  | 13958  | 14528  | NA     | NA     | NA    | NA    | NA     | NA     |
| PGS003530 | Eosinophil Percentage of Leukocytes              | 211456 | 105728 | 105728 | NA     | NA     | NA    | NA    | NA     | NA     |
| PGS003532 | Fat Body Mass                                    | 363831 | 167362 | 196469 | NA     | NA     | NA    | NA    | NA     | NA     |
| PGS003533 | HbA1c Measurement                                | 353562 | 162639 | 190923 | NA     | NA     | NA    | NA    | NA     | NA     |
| PGS003534 | High-Density Lipoprotein Cholesterol Measurement | 323600 | 152092 | 171508 | NA     | NA     | NA    | NA    | NA     | NA     |
| PGS003535 | Bone Density                                     | 212683 | 97834  | 114849 | NA     | NA     | NA    | NA    | NA     | NA     |
| PGS003537 | Bone Density                                     | 213090 | 98021  | 115069 | NA     | NA     | NA    | NA    | NA     | NA     |
| PGS003538 | Waist Hip Ratio                                  | 370269 | 170324 | 199945 | NA     | NA     | NA    | NA    | NA     | NA     |
| PGS003539 | IGF-1 Measurement                                | 351649 | 161759 | 189890 | NA     | NA     | NA    | NA    | NA     | NA     |
| PGS003540 | Whole-Body Water Mass                            | 364252 | 167556 | 196696 | NA     | NA     | NA    | NA    | NA     | NA     |
| PGS003541 | Leukocyte Count                                  | 359777 | 165497 | 194280 | NA     | NA     | NA    | NA    | NA     | NA     |
| PGS003542 | Lipoprotein(a) Measurement                       | 281256 | 129378 | 151878 | NA     | NA     | NA    | NA    | NA     | NA     |
| PGS003543 | Serum Gamma-Glutamyl Transferase Measurement     | 353376 | 162553 | 190823 | NA     | NA     | NA    | NA    | NA     | NA     |
| PGS003544 | Monocyte Count                                   | 359067 | 165171 | 193896 | NA     | NA     | NA    | NA    | NA     | NA     |
| PGS003545 | Neutrophil Count                                 | 359009 | 165144 | 193865 | NA     | NA     | NA    | NA    | NA     | NA     |
| PGS003546 | Platelet Count                                   | 359792 | 165504 | 194288 | NA     | NA     | NA    | NA    | NA     | NA     |
| PGS003547 | Platelet Crit                                    | 359788 | 165502 | 194286 | NA     | NA     | NA    | NA    | NA     | NA     |
| PGS003548 | Mean Platelet Volume                             | 359833 | 165523 | 194310 | NA     | NA     | NA    | NA    | NA     | NA     |
| PGS003549 | Platelet Component Distribution Width            | 359833 | 165523 | 194310 | NA     | NA     | NA    | NA    | NA     | NA     |
| PGS003551 | Reticulocyte Count                               | 353830 | 162762 | 191068 | NA     | NA     | NA    | NA    | NA     | NA     |
| PGS003553 | Urea Measurement                                 | 353513 | 162616 | 190897 | NA     | NA     | NA    | NA    | NA     | NA     |
| PGS003554 | Vitamin D Measurement                            | 338072 | 158894 | 179178 | NA     | NA     | NA    | NA    | NA     | NA     |
| PGS003555 | Waist Hip Ratio                                  | 370312 | 170344 | 199968 | NA     | NA     | NA    | NA    | NA     | NA     |
| PGS003556 | Whole-Body Water Mass                            | 364426 | 167636 | 196790 | NA     | NA     | NA    | NA    | NA     | NA     |
| PGS003557 | Lymphocyte Percentage of Leukocytes              | 358940 | 165112 | 193828 | NA     | NA     | NA    | NA    | NA     | NA     |
| PGS003560 | Mean Corpuscular Hemoglobin                      | 359730 | 165476 | 194254 | NA     | NA     | NA    | NA    | NA     | NA     |
| PGS003561 | Mean Corpuscular Volume                          | 359825 | 165520 | 194306 | NA     | NA     | NA    | NA    | NA     | NA     |
| PGS003562 | Monocyte Percentage of Leukocytes                | 356386 | 163938 | 192448 | NA     | NA     | NA    | NA    | NA     | NA     |
| PGS003566 | Neutrophil Percentage of Leukocytes              | 358504 | 164912 | 193592 | NA     | NA     | NA    | NA    | NA     | NA     |
| PGS003567 | Mean Reticulocyte Volume                         | 353891 | 162790 | 191101 | NA     | NA     | NA    | NA    | NA     | NA     |
| PGS003570 | Mean Corpuscular Volume                          | 353786 | 162742 | 191044 | NA     | NA     | NA    | NA    | NA     | NA     |
| PGS003571 | Systolic Blood Pressure                          | 346292 | 159294 | 186998 | NA     | NA     | NA    | NA    | NA     | NA     |
| PGS003572 | Urate Measurement                                | 353122 | 162436 | 190686 | NA     | NA     | NA    | NA    | NA     | NA     |
| PGS003733 | Type 2 Diabetes Mellitus                         | 251740 | 4964   | 4463   | 6776   | 6776   | NA    | NA    | NA     | NA     |
| PGS003734 | Type 2 Diabetes Mellitus                         | 139705 | 4964   | 4463   | 6776   | 6776   | NA    | NA    | NA     | NA     |
| PGS003735 | Type 2 Diabetes Mellitus                         | 32593  | 4964   | 4463   | 6776   | 6776   | NA    | NA    | NA     | NA     |

|           |                                  |        |        |         |        |        |       |       |        |        |
|-----------|----------------------------------|--------|--------|---------|--------|--------|-------|-------|--------|--------|
| PGS003763 | Parkinson's Disease              | 417508 | 154739 | 160259  | 1916   | 313082 | NA    | NA    | NA     | NA     |
| PGS003835 | Body Height                      | 48332  | 18849  | 29483   | NA     | NA     | NA    | NA    | NA     | NA     |
| PGS003836 | Body Height                      | 48332  | 18849  | 29483   | NA     | NA     | NA    | NA    | NA     | NA     |
| PGS003837 | Body Height                      | 21550  | 9051   | 12499   | NA     | NA     | NA    | NA    | NA     | NA     |
| PGS003838 | Body Height                      | 21550  | 9051   | 12499   | NA     | NA     | NA    | NA    | NA     | NA     |
| PGS003839 | Body Height                      | 85295  | 35824  | 49471   | NA     | NA     | NA    | NA    | NA     | NA     |
| PGS003840 | Body Height                      | 85295  | 35824  | 49471   | NA     | NA     | NA    | NA    | NA     | NA     |
| PGS003841 | Body Height                      | 85295  | 35824  | 49471   | NA     | NA     | NA    | NA    | NA     | NA     |
| PGS003842 | Body Mass Index                  | 48229  | 18809  | 29420   | NA     | NA     | NA    | NA    | NA     | NA     |
| PGS003843 | Body Mass Index                  | 48229  | 18809  | 29420   | NA     | NA     | NA    | NA    | NA     | NA     |
| PGS003844 | Body Mass Index                  | 21514  | 9036   | 12478   | NA     | NA     | NA    | NA    | NA     | NA     |
| PGS003845 | Body Mass Index                  | 21514  | 9036   | 12478   | NA     | NA     | NA    | NA    | NA     | NA     |
| PGS003846 | Body Mass Index                  | 85107  | 35745  | 49362   | NA     | NA     | NA    | NA    | NA     | NA     |
| PGS003847 | Body Mass Index                  | 85107  | 35745  | 49362   | NA     | NA     | NA    | NA    | NA     | NA     |
| PGS003848 | Body Mass Index                  | 85107  | 35745  | 49362   | NA     | NA     | NA    | NA    | NA     | NA     |
| PGS003850 | Colorectal Cancer                | 254791 | 147778 | 1070122 | 100204 | 154587 | NA    | NA    | NA     | NA     |
| PGS003851 | Colorectal Cancer                | 93105  | 36170  | 42520   | 1367   | 77323  | 1089  | 278   | 57058  | 20265  |
| PGS003852 | Colorectal Cancer                | 254791 | 147778 | 1070122 | 100204 | 154587 | NA    | NA    | NA     | NA     |
| PGS003857 | Sleep Apnea                      | 568576 | 519043 | 49533   | NA     | NA     | NA    | NA    | NA     | NA     |
| PGS003858 | Sleep Apnea                      | 568576 | 519043 | 49533   | NA     | NA     | NA    | NA    | NA     | NA     |
| PGS003861 | Pulmonary Embolism               | 9478   | 4364   | 5114    | 622    | 8853   | 286   | 336   | 4076   | 4777   |
| PGS004222 | Gout                             | 403630 | 178427 | 225203  | NA     | NA     | NA    | NA    | NA     | NA     |
| PGS004223 | Type 2 Diabetes Mellitus         | 395809 | 181334 | 214475  | NA     | NA     | NA    | NA    | NA     | NA     |
| PGS004224 | Chronic Kidney Disease           | 214244 | 123998 | 90246   | 43824  | 170420 | 22263 | 21561 | 101735 | 68685  |
| PGS004225 | Type 2 Diabetes Mellitus         | 5024   | 2002   | 3022    | 440    | 4584   | 179   | 261   | 1823   | 2761   |
| PGS004227 | Alzheimer's Disease              | 1838   | 812    | 826     | NA     | NA     | NA    | NA    | NA     | NA     |
| PGS004237 | Coronary Artery Disease          | 408422 | 187620 | 220802  | 32694  | 375728 | NA    | NA    | NA     | NA     |
| PGS004240 | Colorectal Cancer                | 3809   | 1659   | 2150    | 751    | 3058   | NA    | NA    | NA     | NA     |
| PGS004252 | Asthma                           | 298738 | 143954 | 154784  | 5725   | 293013 | 2463  | 3262  | 141491 | 151522 |
| PGS004315 | Psoriasis                        | 654    | 314    | 340     | NA     | NA     | NA    | NA    | NA     | NA     |
| PGS004321 | Coronary Artery Disease          | 14298  | 10906  | 3392    | NA     | NA     | NA    | NA    | NA     | NA     |
| PGS004323 | Type 2 Diabetes Mellitus         | 2676   | 869    | 1807    | NA     | NA     | NA    | NA    | NA     | NA     |
| PGS004325 | Lung Carcinoma                   | 308490 | 144173 | 164327  | 1449   | 307041 | 787   | 662   | 143386 | 163665 |
| PGS004326 | Rheumatoid Arthritis             | 342973 | 159755 | 183218  | 2034   | 340939 | 666   | 1368  | 159089 | 181850 |
| PGS004607 | Age-Related Macular Degeneration | 31525  | 30264  | 1261    | 2302   | 29223  | 2210  | 92    | 28054  | 1169   |
| PGS004615 | Type 2 Diabetes Mellitus         | 195768 | 127249 | 68519   | 55284  | 140484 | 35935 | 19349 | 91315  | 49169  |
| PGS004616 | Type 2 Diabetes Mellitus         | 97884  | 63625  | 34259   | 27642  | 70242  | 17967 | 9675  | 45657  | 24585  |
| PGS004617 | Type 2 Diabetes Mellitus         | 97884  | 63625  | 34259   | 27642  | 70242  | 17967 | 9675  | 45657  | 24585  |
| PGS004618 | Type 2 Diabetes Mellitus         | 195768 | 127249 | 68519   | 55284  | 140484 | 35935 | 19349 | 91315  | 49169  |
| PGS004619 | Type 2 Diabetes Mellitus         | 97884  | 63625  | 34259   | 27642  | 70242  | 17967 | 9675  | 45657  | 24585  |
| PGS004620 | Type 2 Diabetes Mellitus         | 97884  | 63625  | 34259   | 27642  | 70242  | 17967 | 9675  | 45657  | 24585  |
| PGS004682 | Body Height                      | 21550  | 9051   | 12499   | NA     | NA     | NA    | NA    | NA     | NA     |
| PGS004683 | Body Height                      | 21550  | 9051   | 12499   | NA     | NA     | NA    | NA    | NA     | NA     |
| PGS004684 | Body Height                      | 85295  | 35824  | 49471   | NA     | NA     | NA    | NA    | NA     | NA     |
| PGS004685 | Body Height                      | 85295  | 35824  | 49471   | NA     | NA     | NA    | NA    | NA     | NA     |
| PGS004686 | Body Height                      | 85295  | 35824  | 49471   | NA     | NA     | NA    | NA    | NA     | NA     |

| Algotirhm | Parameter                                                                                                                                                           | Setting     |
|-----------|---------------------------------------------------------------------------------------------------------------------------------------------------------------------|-------------|
| P+T       | P-value thresholds: 1, 0.5, 0.05, $5 \times 10^{-4}$ , $5 \times 10^{-6}$ , $5 \times 10^{-8}$ ; $r^2$ thresholds: 0.2, 0.4, 0.6, 0.8; window size: 250 kb          | Grid search |
| LDpred2   | s: 0.7, 1, 1.4; $\rho$ : 0.00010, 0.00018, 0.00032, 0.00056, 0.001, 0.0018, 0.0032, 0.0056, 0.01, 0.018, 0.032, 0.056, 0.1, 0.18, 0.32, 0.56; Sparsity: Ture, False | Grid search |
| Lassosum2 | $\Delta$ : 0.001, 0.01, 0.1, 1; $\lambda$ : 30 logarithmically spaced values from 0.1 to 0.001                                                                      | Grid search |
| SBayesR   | iteration: 10000; burn in: 2000                                                                                                                                     | default     |
| SBLUP     | default                                                                                                                                                             | default     |
| SDPR      | default                                                                                                                                                             | default     |
| PRScs     | Auto                                                                                                                                                                | Auto        |

| Name                             | Algo      | Parameter          | Total R2/AUC | Total Beta/OR | Male Beta/OR | Female Beta/OR | Male AUC | Female AUC | Z-test P-value |
|----------------------------------|-----------|--------------------|--------------|---------------|--------------|----------------|----------|------------|----------------|
| C-Reactive Protein Measurement   | P_T       | X0.000005p_0.2r2   | 0.016        | 0.127         | 0.111        | 0.140          | NA       | NA         | 0.000          |
| C-Reactive Protein Measurement   | LDpred2   | p.0.01_h2.0.7_T    | 0.024        | 0.156         | 0.134        | 0.174          | NA       | NA         | 0.000          |
| C-Reactive Protein Measurement   | Lassosum2 | s.0.001_nl.4       | 0.022        | 0.147         | 0.128        | 0.163          | NA       | NA         | 0.000          |
| C-Reactive Protein Measurement   | SBayesR   | default            | 0.015        | 0.120         | 0.101        | 0.137          | NA       | NA         | 0.000          |
| C-Reactive Protein Measurement   | SDPR      | default            | 0.024        | 0.153         | 0.133        | 0.171          | NA       | NA         | 0.000          |
| C-Reactive Protein Measurement   | SBLUP     | default            | 0.004        | 0.063         | 0.048        | 0.077          | NA       | NA         | 0.000          |
| C-Reactive Protein Measurement   | PRScs     | auto               | 0.023        | 0.150         | 0.127        | 0.170          | NA       | NA         | 0.000          |
| IGF-1 Measurement                | P_T       | X0.05p_0.2r2       | 0.075        | 0.264         | 0.274        | 0.259          | NA       | NA         | 0.014          |
| IGF-1 Measurement                | LDpred2   | p.0.56_h2.1.4_F    | 0.047        | 0.209         | 0.218        | 0.203          | NA       | NA         | 0.020          |
| IGF-1 Measurement                | Lassosum2 | s.0.1_nl.8         | 0.049        | 0.213         | 0.222        | 0.207          | NA       | NA         | 0.018          |
| IGF-1 Measurement                | SBayesR   | default            | 0.058        | 0.233         | 0.246        | 0.225          | NA       | NA         | 0.001          |
| IGF-1 Measurement                | SDPR      | default            | 0.119        | 0.333         | 0.344        | 0.327          | NA       | NA         | 0.003          |
| IGF-1 Measurement                | SBLUP     | default            | 0.042        | 0.197         | 0.203        | 0.195          | NA       | NA         | 0.189          |
| IGF-1 Measurement                | PRScs     | auto               | 0.112        | 0.323         | 0.333        | 0.318          | NA       | NA         | 0.007          |
| Alkaline Phosphatase Measurement | P_T       | X0.05p_0.2r2       | 0.065        | 0.251         | 0.268        | 0.239          | NA       | NA         | 0.000          |
| Alkaline Phosphatase Measurement | LDpred2   | p.0.1_h2.0.7_F     | 0.054        | 0.229         | 0.253        | 0.212          | NA       | NA         | 0.000          |
| Alkaline Phosphatase Measurement | Lassosum2 | s.0.001_nl.30      | 0.041        | 0.200         | 0.210        | 0.194          | NA       | NA         | 0.011          |
| Alkaline Phosphatase Measurement | SBayesR   | default            | 0.039        | 0.195         | 0.211        | 0.184          | NA       | NA         | 0.000          |
| Alkaline Phosphatase Measurement | SDPR      | default            | 0.062        | 0.246         | 0.272        | 0.228          | NA       | NA         | 0.000          |
| Alkaline Phosphatase Measurement | SBLUP     | default            | 0.027        | 0.161         | 0.170        | 0.155          | NA       | NA         | 0.017          |
| Alkaline Phosphatase Measurement | PRScs     | auto               | 0.111        | 0.329         | 0.358        | 0.308          | NA       | NA         | 0.000          |
| Basal Metabolic Rate Measurement | P_T       | X0.5p_0.6r2        | 0.059        | 0.149         | 0.255        | 0.231          | NA       | NA         | 0.000          |
| Basal Metabolic Rate Measurement | LDpred2   | p.0.018_h2.0.7_F   | 0.083        | 0.177         | 0.299        | 0.279          | NA       | NA         | 0.001          |
| Basal Metabolic Rate Measurement | Lassosum2 | s.0.01_nl.4        | 0.071        | 0.164         | 0.277        | 0.257          | NA       | NA         | 0.001          |
| Basal Metabolic Rate Measurement | SBayesR   | default            | 0.063        | 0.154         | 0.262        | 0.240          | NA       | NA         | 0.000          |
| Basal Metabolic Rate Measurement | SDPR      | default            | 0.082        | 0.176         | 0.297        | 0.276          | NA       | NA         | 0.000          |
| Basal Metabolic Rate Measurement | SBLUP     | default            | 0.037        | 0.119         | 0.202        | 0.184          | NA       | NA         | 0.003          |
| Basal Metabolic Rate Measurement | PRScs     | auto               | 0.078        | 0.171         | 0.289        | 0.270          | NA       | NA         | 0.001          |
| Glomerular Filtration Rate       | P_T       | X0.05p_0.2r2       | 0.022        | 0.130         | 0.141        | 0.168          | NA       | NA         | 0.000          |
| Glomerular Filtration Rate       | LDpred2   | p.0.56_h2.0.7_F    | 0.021        | 0.126         | 0.136        | 0.163          | NA       | NA         | 0.000          |
| Glomerular Filtration Rate       | Lassosum2 | s.0.01_nl.21       | 0.021        | 0.125         | 0.136        | 0.163          | NA       | NA         | 0.000          |
| Glomerular Filtration Rate       | SBayesR   | default            | 0.026        | 0.141         | 0.150        | 0.186          | NA       | NA         | 0.000          |
| Glomerular Filtration Rate       | SDPR      | default            | 0.040        | 0.174         | 0.186        | 0.229          | NA       | NA         | 0.000          |
| Glomerular Filtration Rate       | SBLUP     | default            | 0.013        | 0.097         | 0.104        | 0.129          | NA       | NA         | 0.000          |
| Glomerular Filtration Rate       | PRScs     | auto               | 0.037        | 0.167         | 0.182        | 0.218          | NA       | NA         | 0.000          |
| Leukocyte Count                  | P_T       | X0.5p_0.2r2        | 0.027        | 0.165         | 0.155        | 0.175          | NA       | NA         | 0.001          |
| Leukocyte Count                  | LDpred2   | p.0.56_h2.0.7_F    | 0.013        | 0.112         | 0.103        | 0.121          | NA       | NA         | 0.004          |
| Leukocyte Count                  | Lassosum2 | s.0.1_nl.23        | 0.014        | 0.119         | 0.110        | 0.128          | NA       | NA         | 0.005          |
| Leukocyte Count                  | SBayesR   | default            | 0.035        | 0.186         | 0.174        | 0.198          | NA       | NA         | 0.000          |
| Leukocyte Count                  | SDPR      | default            | 0.048        | 0.219         | 0.209        | 0.229          | NA       | NA         | 0.001          |
| Leukocyte Count                  | SBLUP     | default            | 0.018        | 0.135         | 0.127        | 0.143          | NA       | NA         | 0.014          |
| Leukocyte Count                  | PRScs     | auto               | 0.037        | 0.192         | 0.181        | 0.204          | NA       | NA         | 0.000          |
| Liver Fat Measurement            | P_T       | X0.0000005p_0.2r2  | 0.031        | 0.175         | 0.210        | 0.138          | NA       | NA         | 0.003          |
| Liver Fat Measurement            | LDpred2   | p.0.00032_h2.0.7_F | 0.023        | 0.149         | 0.177        | 0.121          | NA       | NA         | 0.021          |
| Liver Fat Measurement            | Lassosum2 | s.0.01_nl.2        | 0.023        | 0.150         | 0.179        | 0.119          | NA       | NA         | 0.015          |
| Liver Fat Measurement            | SBayesR   | default            | 0.030        | 0.172         | 0.198        | 0.145          | NA       | NA         | 0.030          |
| Liver Fat Measurement            | SDPR      | default            | 0.027        | 0.163         | 0.188        | 0.137          | NA       | NA         | 0.038          |
| Liver Fat Measurement            | SBLUP     | default            | 0.001        | 0.027         | 0.022        | 0.033          | NA       | NA         | 0.661          |
| Liver Fat Measurement            | PRScs     | auto               | 0.006        | 0.078         | 0.069        | 0.088          | NA       | NA         | 0.461          |

|                                           |           |                   |       |       |       |       |    |    |       |
|-------------------------------------------|-----------|-------------------|-------|-------|-------|-------|----|----|-------|
| Lymphocyte Count                          | P_T       | X1p_0.4r2         | 0.007 | 0.081 | 0.072 | 0.092 | NA | NA | 0.002 |
| Lymphocyte Count                          | LDpred2   | p.0.56_h2.0.7_F   | 0.005 | 0.068 | 0.060 | 0.078 | NA | NA | 0.005 |
| Lymphocyte Count                          | Lassosum2 | s.0.1_nl.8        | 0.005 | 0.068 | 0.059 | 0.077 | NA | NA | 0.004 |
| Lymphocyte Count                          | SBayesR   | default           | 0.009 | 0.093 | 0.086 | 0.102 | NA | NA | 0.008 |
| Lymphocyte Count                          | SDPR      | default           | 0.014 | 0.119 | 0.109 | 0.131 | NA | NA | 0.000 |
| Lymphocyte Count                          | SBLUP     | default           | 0.004 | 0.064 | 0.059 | 0.069 | NA | NA | 0.107 |
| Lymphocyte Count                          | PRScs     | auto              | 0.010 | 0.102 | 0.093 | 0.112 | NA | NA | 0.002 |
| Lymphocyte Percentage of Leukocytes       | P_T       | X0.05p_0.2r2      | 0.052 | 0.226 | 0.220 | 0.235 | NA | NA | 0.016 |
| Lymphocyte Percentage of Leukocytes       | LDpred2   | p.0.056_h2.0.7_T  | 0.075 | 0.272 | 0.265 | 0.282 | NA | NA | 0.005 |
| Lymphocyte Percentage of Leukocytes       | Lassosum2 | s.0.001_nl.4      | 0.076 | 0.273 | 0.265 | 0.285 | NA | NA | 0.001 |
| Lymphocyte Percentage of Leukocytes       | SBayesR   | default           | 0.047 | 0.215 | 0.212 | 0.221 | NA | NA | 0.129 |
| Lymphocyte Percentage of Leukocytes       | SDPR      | default           | 0.076 | 0.274 | 0.266 | 0.285 | NA | NA | 0.002 |
| Lymphocyte Percentage of Leukocytes       | SBLUP     | default           | 0.023 | 0.150 | 0.147 | 0.154 | NA | NA | 0.307 |
| Lymphocyte Percentage of Leukocytes       | PRScs     | auto              | 0.076 | 0.274 | 0.267 | 0.285 | NA | NA | 0.003 |
| Mean Corpuscular Hemoglobin Concentration | P_T       | X0.000005p_0.2r2  | 0.008 | 0.091 | 0.099 | 0.086 | NA | NA | 0.042 |
| Mean Corpuscular Hemoglobin Concentration | LDpred2   | p.0.032_h2.1_F    | 0.008 | 0.089 | 0.097 | 0.084 | NA | NA | 0.044 |
| Mean Corpuscular Hemoglobin Concentration | Lassosum2 | s.0.001_nl.17     | 0.007 | 0.081 | 0.087 | 0.077 | NA | NA | 0.103 |
| Mean Corpuscular Hemoglobin Concentration | SBayesR   | default           | 0.015 | 0.122 | 0.132 | 0.116 | NA | NA | 0.012 |
| Mean Corpuscular Hemoglobin Concentration | SDPR      | default           | 0.013 | 0.115 | 0.121 | 0.110 | NA | NA | 0.082 |
| Mean Corpuscular Hemoglobin Concentration | SBLUP     | default           | 0.004 | 0.066 | 0.071 | 0.061 | NA | NA | 0.130 |
| Mean Corpuscular Hemoglobin Concentration | PRScs     | auto              | 0.015 | 0.122 | 0.133 | 0.114 | NA | NA | 0.002 |
| Peak Expiratory Flow                      | P_T       | X1p_0.4r2         | 0.015 | 0.100 | 0.124 | 0.114 | NA | NA | 0.136 |
| Peak Expiratory Flow                      | LDpred2   | p.0.56_h2.0.7_F   | 0.010 | 0.083 | 0.101 | 0.097 | NA | NA | 0.517 |
| Peak Expiratory Flow                      | Lassosum2 | s.0.001_nl.15     | 0.012 | 0.090 | 0.110 | 0.104 | NA | NA | 0.342 |
| Peak Expiratory Flow                      | SBayesR   | default           | 0.013 | 0.093 | 0.113 | 0.108 | NA | NA | 0.366 |
| Peak Expiratory Flow                      | SDPR      | default           | 0.021 | 0.118 | 0.142 | 0.139 | NA | NA | 0.577 |
| Peak Expiratory Flow                      | SBLUP     | default           | 0.009 | 0.079 | 0.097 | 0.091 | NA | NA | 0.306 |
| Peak Expiratory Flow                      | PRScs     | auto              | 0.019 | 0.113 | 0.137 | 0.132 | NA | NA | 0.418 |
| Platelet Count                            | P_T       | X0.05p_0.2r2      | 0.116 | 0.330 | 0.336 | 0.343 | NA | NA | 0.213 |
| Platelet Count                            | LDpred2   | p.0.56_h2.1_F     | 0.078 | 0.270 | 0.276 | 0.280 | NA | NA | 0.464 |
| Platelet Count                            | Lassosum2 | s.0.01_nl.15      | 0.078 | 0.271 | 0.276 | 0.281 | NA | NA | 0.425 |
| Platelet Count                            | SBayesR   | default           | 0.044 | 0.203 | 0.208 | 0.210 | NA | NA | 0.768 |
| Platelet Count                            | SDPR      | default           | 0.104 | 0.313 | 0.320 | 0.323 | NA | NA | 0.590 |
| Platelet Count                            | SBLUP     | default           | 0.062 | 0.241 | 0.246 | 0.250 | NA | NA | 0.466 |
| Platelet Count                            | PRScs     | auto              | 0.175 | 0.407 | 0.415 | 0.421 | NA | NA | 0.238 |
| Serum Albumin Measurement                 | P_T       | X0.05p_0.2r2      | 0.025 | 0.156 | 0.156 | 0.157 | NA | NA | 0.883 |
| Serum Albumin Measurement                 | LDpred2   | p.0.1_h2.0.7_F    | 0.025 | 0.157 | 0.160 | 0.156 | NA | NA | 0.580 |
| Serum Albumin Measurement                 | Lassosum2 | s.1_nl.13         | 0.022 | 0.145 | 0.146 | 0.147 | NA | NA | 0.936 |
| Serum Albumin Measurement                 | SBayesR   | default           | 0.008 | 0.087 | 0.087 | 0.089 | NA | NA | 0.786 |
| Serum Albumin Measurement                 | SDPR      | default           | 0.009 | 0.096 | 0.094 | 0.098 | NA | NA | 0.577 |
| Serum Albumin Measurement                 | SBLUP     | default           | 0.009 | 0.095 | 0.096 | 0.095 | NA | NA | 0.864 |
| Serum Albumin Measurement                 | PRScs     | auto              | 0.031 | 0.174 | 0.176 | 0.174 | NA | NA | 0.740 |
| Testosterone Measurement                  | P_T       | X0.0000005p_0.2r2 | 0.014 | 0.053 | 0.169 | 0.012 | NA | NA | 0.000 |
| Testosterone Measurement                  | LDpred2   | p.1e.04_h2.1.4_F  | 0.012 | 0.049 | 0.155 | 0.014 | NA | NA | 0.000 |
| Testosterone Measurement                  | Lassosum2 | s.0.1_nl.3        | 0.013 | 0.051 | 0.162 | 0.012 | NA | NA | 0.000 |
| Testosterone Measurement                  | SBayesR   | default           | 0.008 | 0.038 | 0.123 | 0.008 | NA | NA | 0.000 |
| Testosterone Measurement                  | SDPR      | default           | 0.019 | 0.060 | 0.192 | 0.012 | NA | NA | 0.000 |
| Testosterone Measurement                  | SBLUP     | default           | 0.002 | 0.021 | 0.067 | 0.006 | NA | NA | 0.000 |
| Testosterone Measurement                  | PRScs     | auto              | 0.010 | 0.043 | 0.139 | 0.003 | NA | NA | 0.000 |
| Urinary Microalbumin Measurement          | P_T       | X0.05p_0.8r2      | 0.000 | 0.021 | 0.021 | 0.023 | NA | NA | 0.886 |

|                                  |           |                  |       |       |       |       |       |       |       |
|----------------------------------|-----------|------------------|-------|-------|-------|-------|-------|-------|-------|
| Urinary Microalbumin Measurement | LDpred2   | p.0.0018_h2.1_T  | 0.001 | 0.026 | 0.027 | 0.025 | NA    | NA    | 0.842 |
| Urinary Microalbumin Measurement | Lassosum2 | s.0.01_nl.16     | 0.000 | 0.017 | 0.013 | 0.025 | NA    | NA    | 0.291 |
| Urinary Microalbumin Measurement | SBayesR   | default          | 0.000 | 0.016 | 0.020 | 0.010 | NA    | NA    | 0.382 |
| Urinary Microalbumin Measurement | SDPR      | default          | 0.000 | 0.013 | 0.012 | 0.016 | NA    | NA    | 0.723 |
| Urinary Microalbumin Measurement | SBLUP     | default          | 0.000 | 0.013 | 0.016 | 0.009 | NA    | NA    | 0.574 |
| Urinary Microalbumin Measurement | PRScs     | auto             | 0.000 | 0.019 | 0.020 | 0.019 | NA    | NA    | 0.916 |
| Urinary Potassium Measurement    | P_T       | X1p_0.4r2        | 0.004 | 0.062 | 0.060 | 0.066 | NA    | NA    | 0.321 |
| Urinary Potassium Measurement    | LDpred2   | p.0.56_h2.0.7_F  | 0.003 | 0.057 | 0.058 | 0.058 | NA    | NA    | 0.972 |
| Urinary Potassium Measurement    | Lassosum2 | s.0.1_nl.23      | 0.003 | 0.057 | 0.058 | 0.058 | NA    | NA    | 0.992 |
| Urinary Potassium Measurement    | SBayesR   | default          | 0.003 | 0.051 | 0.053 | 0.051 | NA    | NA    | 0.816 |
| Urinary Potassium Measurement    | SDPR      | default          | 0.004 | 0.066 | 0.069 | 0.065 | NA    | NA    | 0.505 |
| Urinary Potassium Measurement    | SBLUP     | default          | 0.002 | 0.046 | 0.044 | 0.049 | NA    | NA    | 0.428 |
| Urinary Potassium Measurement    | PRScs     | auto             | 0.005 | 0.067 | 0.069 | 0.066 | NA    | NA    | 0.684 |
| Inguinal Hernia                  | P_T       | X0.000005p_0.4r2 | 0.808 | 1.253 | 1.245 | 1.341 | 0.636 | 0.662 | 0.144 |
| Inguinal Hernia                  | LDpred2   | p.0.56_h2.0.7_F  | 0.807 | 1.255 | 1.253 | 1.281 | 0.636 | 0.657 | 0.657 |
| Inguinal Hernia                  | Lassosum2 | s.0.001_nl.27    | 0.803 | 1.121 | 1.116 | 1.178 | 0.625 | 0.649 | 0.282 |
| Inguinal Hernia                  | SBayesR   | default          | 0.807 | 1.234 | 1.227 | 1.307 | 0.634 | 0.658 | 0.214 |
| Inguinal Hernia                  | SDPR      | default          | 0.814 | 1.376 | 1.368 | 1.457 | 0.649 | 0.675 | 0.210 |
| Inguinal Hernia                  | SBLUP     | default          | 0.805 | 1.196 | 1.195 | 1.200 | 0.631 | 0.651 | 0.934 |
| Inguinal Hernia                  | PRScs     | auto             | 0.810 | 1.306 | 1.301 | 1.368 | 0.641 | 0.665 | 0.326 |
| Ankylosing Spondylitis           | P_T       | X0.0005p_0.8r2   | 0.750 | 2.196 | 2.438 | 1.793 | 0.775 | 0.683 | 0.002 |
| Ankylosing Spondylitis           | LDpred2   | p.0.56_h2.0.7_F  | 0.695 | 1.837 | 2.107 | 1.450 | 0.706 | 0.637 | 0.004 |
| Ankylosing Spondylitis           | Lassosum2 | s.0.001_nl.30    | 0.688 | 1.753 | 1.999 | 1.393 | 0.697 | 0.632 | 0.005 |
| Ankylosing Spondylitis           | SBayesR   | default          | 0.776 | 1.943 | 2.069 | 1.720 | 0.813 | 0.713 | 0.005 |
| Ankylosing Spondylitis           | SDPR      | default          | 0.749 | 1.962 | 2.076 | 1.758 | 0.771 | 0.704 | 0.036 |
| Ankylosing Spondylitis           | SBLUP     | default          | 0.649 | 1.278 | 1.392 | 1.098 | 0.632 | 0.597 | 0.062 |
| Ankylosing Spondylitis           | PRScs     | auto             | 0.749 | 2.144 | 2.375 | 1.776 | 0.776 | 0.691 | 0.002 |
| Asthma                           | P_T       | X1p_0.8r2        | 0.599 | 1.335 | 1.335 | 1.336 | 0.594 | 0.593 | 0.971 |
| Asthma                           | LDpred2   | p.1e.04_h2.0.7_F | 0.594 | 1.308 | 1.343 | 1.283 | 0.597 | 0.583 | 0.037 |
| Asthma                           | Lassosum2 | s.1_nl.1         | 0.563 | 1.090 | 1.075 | 1.101 | 0.558 | 0.551 | 0.287 |
| Asthma                           | SBayesR   | default          | 0.600 | 1.343 | 1.359 | 1.332 | 0.600 | 0.591 | 0.345 |
| Asthma                           | SDPR      | default          | 0.616 | 1.439 | 1.464 | 1.421 | 0.617 | 0.607 | 0.180 |
| Asthma                           | SBLUP     | default          | 0.581 | 1.232 | 1.221 | 1.239 | 0.575 | 0.574 | 0.501 |
| Asthma                           | PRScs     | auto             | 0.610 | 1.406 | 1.416 | 1.399 | 0.607 | 0.604 | 0.562 |
| Atrial Fibrillation              | P_T       | X0.0005p_0.6r2   | 0.749 | 1.469 | 1.493 | 1.430 | 0.724 | 0.742 | 0.074 |
| Atrial Fibrillation              | LDpred2   | p.0.018_h2.0.7_T | 0.740 | 1.302 | 1.312 | 1.285 | 0.713 | 0.735 | 0.324 |
| Atrial Fibrillation              | Lassosum2 | s.0.001_nl.23    | 0.734 | 1.184 | 1.193 | 1.169 | 0.704 | 0.728 | 0.337 |
| Atrial Fibrillation              | SBayesR   | default          | 0.745 | 1.417 | 1.424 | 1.403 | 0.718 | 0.740 | 0.541 |
| Atrial Fibrillation              | SDPR      | default          | 0.756 | 1.577 | 1.609 | 1.527 | 0.734 | 0.747 | 0.031 |
| Atrial Fibrillation              | SBLUP     | default          | 0.735 | 1.227 | 1.220 | 1.236 | 0.704 | 0.730 | 0.583 |
| Atrial Fibrillation              | PRScs     | auto             | 0.752 | 1.513 | 1.529 | 1.487 | 0.727 | 0.745 | 0.256 |
| Chronic Kidney Disease           | P_T       | X0.5p_0.8r2      | 0.719 | 1.181 | 1.133 | 1.235 | 0.712 | 0.721 | 0.002 |
| Chronic Kidney Disease           | LDpred2   | p.0.0032_h2.1_T  | 0.715 | 1.063 | 1.043 | 1.084 | 0.710 | 0.715 | 0.156 |
| Chronic Kidney Disease           | Lassosum2 | s.1_nl.2         | 0.716 | 1.066 | 1.046 | 1.086 | 0.710 | 0.715 | 0.182 |
| Chronic Kidney Disease           | SBayesR   | default          | 0.718 | 1.164 | 1.131 | 1.201 | 0.712 | 0.720 | 0.033 |
| Chronic Kidney Disease           | SDPR      | default          | 0.721 | 1.213 | 1.181 | 1.250 | 0.714 | 0.723 | 0.045 |
| Chronic Kidney Disease           | SBLUP     | default          | 0.718 | 1.152 | 1.125 | 1.182 | 0.712 | 0.719 | 0.086 |
| Chronic Kidney Disease           | PRScs     | auto             | 0.720 | 1.203 | 1.150 | 1.262 | 0.713 | 0.723 | 0.001 |
| Hypertension                     | P_T       | X0.5p_0.6r2      | 0.717 | 1.413 | 1.378 | 1.450 | 0.705 | 0.717 | 0.001 |
| Hypertension                     | LDpred2   | p.0.56_h2.0.7_F  | 0.722 | 1.475 | 1.446 | 1.503 | 0.710 | 0.720 | 0.008 |

|                               |           |                    |       |       |       |       |       |       |       |
|-------------------------------|-----------|--------------------|-------|-------|-------|-------|-------|-------|-------|
| Hypertension                  | Lassosum2 | s.0.01_nl.23       | 0.700 | 1.101 | 1.106 | 1.096 | 0.689 | 0.697 | 0.519 |
| Hypertension                  | SBayesR   | default            | 0.719 | 1.445 | 1.426 | 1.464 | 0.708 | 0.718 | 0.075 |
| Hypertension                  | SDPR      | default            | 0.726 | 1.547 | 1.514 | 1.580 | 0.715 | 0.726 | 0.005 |
| Hypertension                  | SBLUP     | default            | 0.711 | 1.312 | 1.294 | 1.329 | 0.699 | 0.708 | 0.063 |
| Hypertension                  | PRScs     | auto               | 0.725 | 1.529 | 1.492 | 1.567 | 0.713 | 0.725 | 0.001 |
| Hypothyroidism                | P_T       | X0.5p_0.2r2        | 0.717 | 1.519 | 1.574 | 1.504 | 0.660 | 0.637 | 0.114 |
| Hypothyroidism                | LDpred2   | p.0.56_h2.0.7_F    | 0.727 | 1.645 | 1.661 | 1.641 | 0.671 | 0.656 | 0.674 |
| Hypothyroidism                | Lassosum2 | s.1_nl.1           | 0.695 | 1.237 | 1.221 | 1.241 | 0.620 | 0.601 | 0.527 |
| Hypothyroidism                | SBayesR   | default            | 0.732 | 1.700 | 1.696 | 1.702 | 0.677 | 0.666 | 0.905 |
| Hypothyroidism                | SDPR      | default            | 0.718 | 1.525 | 1.526 | 1.524 | 0.655 | 0.642 | 0.967 |
| Hypothyroidism                | SBLUP     | default            | 0.704 | 1.365 | 1.366 | 1.365 | 0.636 | 0.617 | 0.972 |
| Hypothyroidism                | PRScs     | auto               | 0.737 | 1.728 | 1.747 | 1.725 | 0.682 | 0.672 | 0.662 |
| Osteoarthritis                | P_T       | X1p_0.8r2          | 0.668 | 1.232 | 1.222 | 1.241 | 0.650 | 0.674 | 0.306 |
| Osteoarthritis                | LDpred2   | p.1e.04_h2.1.4_T   | 0.659 | 1.056 | 1.042 | 1.066 | 0.639 | 0.665 | 0.120 |
| Osteoarthritis                | Lassosum2 | s.1_nl.16          | 0.658 | 1.028 | 1.025 | 1.030 | 0.639 | 0.664 | 0.740 |
| Osteoarthritis                | SBayesR   | default            | 0.667 | 1.214 | 1.200 | 1.226 | 0.648 | 0.673 | 0.159 |
| Osteoarthritis                | SDPR      | default            | 0.670 | 1.262 | 1.243 | 1.278 | 0.651 | 0.677 | 0.072 |
| Osteoarthritis                | SBLUP     | default            | 0.663 | 1.162 | 1.147 | 1.173 | 0.644 | 0.670 | 0.145 |
| Osteoarthritis                | PRScs     | auto               | 0.670 | 1.258 | 1.250 | 1.265 | 0.652 | 0.676 | 0.450 |
| Type 1 Diabetes Mellitus      | P_T       | X0.0000005p_0.6r2  | 0.670 | 1.626 | 1.418 | 1.952 | 0.632 | 0.698 | 0.000 |
| Type 1 Diabetes Mellitus      | LDpred2   | p.0.032_h2.1.4_T   | 0.662 | 1.533 | 1.371 | 1.769 | 0.629 | 0.685 | 0.000 |
| Type 1 Diabetes Mellitus      | Lassosum2 | s.0.01_nl.8        | 0.643 | 1.343 | 1.271 | 1.439 | 0.623 | 0.645 | 0.014 |
| Type 1 Diabetes Mellitus      | SBayesR   | default            | 0.670 | 1.635 | 1.519 | 1.798 | 0.643 | 0.683 | 0.003 |
| Type 1 Diabetes Mellitus      | SDPR      | default            | 0.678 | 1.683 | 1.478 | 1.984 | 0.642 | 0.701 | 0.000 |
| Type 1 Diabetes Mellitus      | SBLUP     | default            | 0.637 | 1.359 | 1.306 | 1.431 | 0.619 | 0.632 | 0.148 |
| Type 1 Diabetes Mellitus      | PRScs     | auto               | 0.680 | 1.686 | 1.516 | 1.937 | 0.647 | 0.705 | 0.000 |
| Type 2 Diabetes Mellitus      | P_T       | X0.5p_0.8r2        | 0.695 | 1.518 | 1.514 | 1.522 | 0.676 | 0.676 | 0.819 |
| Type 2 Diabetes Mellitus      | LDpred2   | p.1e.04_h2.1.4_T   | 0.676 | 1.281 | 1.292 | 1.266 | 0.653 | 0.649 | 0.381 |
| Type 2 Diabetes Mellitus      | Lassosum2 | s.0.001_nl.9       | 0.668 | 1.158 | 1.174 | 1.135 | 0.642 | 0.639 | 0.142 |
| Type 2 Diabetes Mellitus      | SBayesR   | default            | 0.698 | 1.548 | 1.543 | 1.555 | 0.678 | 0.680 | 0.746 |
| Type 2 Diabetes Mellitus      | SDPR      | default            | 0.715 | 1.723 | 1.739 | 1.701 | 0.700 | 0.697 | 0.362 |
| Type 2 Diabetes Mellitus      | SBLUP     | default            | 0.682 | 1.375 | 1.370 | 1.380 | 0.660 | 0.660 | 0.767 |
| Type 2 Diabetes Mellitus      | PRScs     | auto               | 0.710 | 1.675 | 1.682 | 1.665 | 0.694 | 0.692 | 0.657 |
| Urinary Bladder Carcinoma     | P_T       | X0.0000005p_0.2r2  | 0.755 | 1.197 | 1.219 | 1.141 | 0.712 | 0.693 | 0.324 |
| Urinary Bladder Carcinoma     | LDpred2   | p.0.00056_h2.1.4_T | 0.754 | 1.114 | 1.105 | 1.138 | 0.709 | 0.694 | 0.648 |
| Urinary Bladder Carcinoma     | Lassosum2 | s.0.001_nl.15      | 0.754 | 1.107 | 1.121 | 1.069 | 0.709 | 0.691 | 0.483 |
| Urinary Bladder Carcinoma     | SBayesR   | default            | 0.755 | 1.199 | 1.212 | 1.166 | 0.713 | 0.693 | 0.563 |
| Urinary Bladder Carcinoma     | SDPR      | default            | 0.758 | 1.277 | 1.277 | 1.276 | 0.716 | 0.700 | 0.989 |
| Urinary Bladder Carcinoma     | SBLUP     | default            | 0.753 | 1.079 | 1.089 | 1.053 | 0.708 | 0.691 | 0.615 |
| Urinary Bladder Carcinoma     | PRScs     | auto               | 0.754 | 1.137 | 1.148 | 1.109 | 0.710 | 0.691 | 0.612 |
| Venous Thromboembolism        | P_T       | X0.000005p_0.8r2   | 0.637 | 1.374 | 1.424 | 1.331 | 0.638 | 0.638 | 0.023 |
| Venous Thromboembolism        | LDpred2   | p.0.56_h2.0.7_F    | 0.614 | 1.191 | 1.194 | 1.190 | 0.611 | 0.621 | 0.917 |
| Venous Thromboembolism        | Lassosum2 | s.0.001_nl.20      | 0.609 | 1.120 | 1.097 | 1.140 | 0.603 | 0.618 | 0.210 |
| Venous Thromboembolism        | SBayesR   | default            | 0.623 | 1.262 | 1.273 | 1.252 | 0.619 | 0.629 | 0.568 |
| Venous Thromboembolism        | SDPR      | default            | 0.642 | 1.409 | 1.470 | 1.357 | 0.646 | 0.642 | 0.007 |
| Venous Thromboembolism        | SBLUP     | default            | 0.609 | 1.118 | 1.116 | 1.120 | 0.604 | 0.616 | 0.892 |
| Venous Thromboembolism        | PRScs     | auto               | 0.631 | 1.340 | 1.370 | 1.314 | 0.632 | 0.634 | 0.172 |
| Apolipoprotein A1 Measurement | P_T       | X0.0005p_0.8r2     | 0.052 | 0.210 | 0.224 | 0.232 | NA    | NA    | 0.375 |
| Apolipoprotein A1 Measurement | LDpred2   | p.0.0018_h2.1.4_F  | 0.066 | 0.237 | 0.251 | 0.262 | NA    | NA    | 0.181 |
| Apolipoprotein A1 Measurement | Lassosum2 | s.1_nl.11          | 0.063 | 0.231 | 0.245 | 0.255 | NA    | NA    | 0.208 |

|                               |           |                   |       |       |       |       |    |    |       |
|-------------------------------|-----------|-------------------|-------|-------|-------|-------|----|----|-------|
| Apolipoprotein A1 Measurement | SBayesR   | default           | 0.042 | 0.189 | 0.202 | 0.208 | NA | NA | 0.508 |
| Apolipoprotein A1 Measurement | SDPR      | default           | 0.039 | 0.182 | 0.195 | 0.199 | NA | NA | 0.610 |
| Apolipoprotein A1 Measurement | SBLUP     | default           | 0.005 | 0.068 | 0.083 | 0.067 | NA | NA | 0.064 |
| Apolipoprotein A1 Measurement | PRScs     | auto              | 0.042 | 0.189 | 0.206 | 0.206 | NA | NA | 0.994 |
| Apolipoprotein B Measurement  | P_T       | X0.0005p_0.2r2    | 0.055 | 0.233 | 0.217 | 0.247 | NA | NA | 0.000 |
| Apolipoprotein B Measurement  | LDpred2   | p.0.0032_h2.1.4_F | 0.070 | 0.264 | 0.247 | 0.278 | NA | NA | 0.000 |
| Apolipoprotein B Measurement  | Lassosum2 | s.1_nl.12         | 0.065 | 0.255 | 0.239 | 0.269 | NA | NA | 0.000 |
| Apolipoprotein B Measurement  | SBayesR   | default           | 0.036 | 0.189 | 0.177 | 0.201 | NA | NA | 0.003 |
| Apolipoprotein B Measurement  | SDPR      | default           | 0.045 | 0.212 | 0.199 | 0.224 | NA | NA | 0.002 |
| Apolipoprotein B Measurement  | SBLUP     | default           | 0.005 | 0.067 | 0.060 | 0.072 | NA | NA | 0.132 |
| Apolipoprotein B Measurement  | PRScs     | auto              | 0.055 | 0.234 | 0.220 | 0.245 | NA | NA | 0.002 |
| Basophil Count                | P_T       | X0.000005p_0.2r2  | 0.007 | 0.086 | 0.090 | 0.084 | NA | NA | 0.369 |
| Basophil Count                | LDpred2   | p.0.0032_h2.0.7_T | 0.012 | 0.108 | 0.109 | 0.109 | NA | NA | 0.982 |
| Basophil Count                | Lassosum2 | NA                | NA    | NA    | NA    | NA    | NA | NA | NA    |
| Basophil Count                | SBayesR   | default           | 0.002 | 0.039 | 0.043 | 0.036 | NA | NA | 0.289 |
| Basophil Count                | SDPR      | default           | 0.011 | 0.106 | 0.107 | 0.105 | NA | NA | 0.732 |
| Basophil Count                | SBLUP     | default           | 0.002 | 0.046 | 0.047 | 0.045 | NA | NA | 0.826 |
| Basophil Count                | PRScs     | auto              | 0.009 | 0.094 | 0.092 | 0.095 | NA | NA | 0.615 |
| Birth Weight                  | P_T       | X0.5p_0.8r2       | 0.009 | 0.092 | 0.080 | 0.102 | NA | NA | 0.008 |
| Birth Weight                  | LDpred2   | p.0.0056_h2.1.4_F | 0.013 | 0.113 | 0.094 | 0.128 | NA | NA | 0.000 |
| Birth Weight                  | Lassosum2 | s.1_nl.3          | 0.009 | 0.096 | 0.087 | 0.105 | NA | NA | 0.038 |
| Birth Weight                  | SBayesR   | default           | 0.002 | 0.041 | 0.034 | 0.047 | NA | NA | 0.135 |
| Birth Weight                  | SDPR      | default           | 0.003 | 0.057 | 0.049 | 0.064 | NA | NA | 0.061 |
| Birth Weight                  | SBLUP     | default           | 0.005 | 0.068 | 0.048 | 0.083 | NA | NA | 0.000 |
| Birth Weight                  | PRScs     | auto              | 0.010 | 0.100 | 0.087 | 0.112 | NA | NA | 0.003 |
| Fat Body Mass                 | P_T       | X0.5p_0.6r2       | 0.051 | 0.166 | 0.213 | 0.230 | NA | NA | 0.006 |
| Fat Body Mass                 | LDpred2   | p.0.056_h2.1_F    | 0.065 | 0.188 | 0.243 | 0.257 | NA | NA | 0.017 |
| Fat Body Mass                 | Lassosum2 | s.1_nl.4          | 0.052 | 0.169 | 0.221 | 0.229 | NA | NA | 0.182 |
| Fat Body Mass                 | SBayesR   | default           | 0.017 | 0.096 | 0.124 | 0.132 | NA | NA | 0.151 |
| Fat Body Mass                 | SDPR      | default           | 0.065 | 0.188 | 0.244 | 0.257 | NA | NA | 0.035 |
| Fat Body Mass                 | SBLUP     | default           | 0.030 | 0.128 | 0.161 | 0.179 | NA | NA | 0.003 |
| Fat Body Mass                 | PRScs     | auto              | 0.061 | 0.182 | 0.236 | 0.250 | NA | NA | 0.027 |
| Body Height                   | P_T       | X0.05p_0.2r2      | 0.158 | 0.273 | 0.392 | 0.390 | NA | NA | 0.705 |
| Body Height                   | LDpred2   | p.0.32_h2.0.7_T   | 0.204 | 0.310 | 0.446 | 0.442 | NA | NA | 0.535 |
| Body Height                   | Lassosum2 | s.0.1_nl.4        | 0.225 | 0.326 | 0.467 | 0.467 | NA | NA | 0.961 |
| Body Height                   | SBayesR   | default           | 0.058 | 0.166 | 0.238 | 0.237 | NA | NA | 0.987 |
| Body Height                   | SDPR      | default           | 0.230 | 0.330 | 0.473 | 0.470 | NA | NA | 0.539 |
| Body Height                   | SBLUP     | default           | 0.088 | 0.204 | 0.294 | 0.289 | NA | NA | 0.433 |
| Body Height                   | PRScs     | auto              | 0.225 | 0.326 | 0.466 | 0.466 | NA | NA | 0.955 |
| Creatinine Measurement        | P_T       | X0.05p_0.2r2      | 0.022 | 0.129 | 0.141 | 0.168 | NA | NA | 0.000 |
| Creatinine Measurement        | LDpred2   | p.0.032_h2.0.7_T  | 0.039 | 0.172 | 0.188 | 0.221 | NA | NA | 0.000 |
| Creatinine Measurement        | Lassosum2 | s.0.001_nl.3      | 0.035 | 0.163 | 0.175 | 0.214 | NA | NA | 0.000 |
| Creatinine Measurement        | SBayesR   | default           | 0.006 | 0.067 | 0.074 | 0.086 | NA | NA | 0.064 |
| Creatinine Measurement        | SDPR      | default           | 0.040 | 0.174 | 0.187 | 0.229 | NA | NA | 0.000 |
| Creatinine Measurement        | SBLUP     | default           | 0.013 | 0.098 | 0.105 | 0.130 | NA | NA | 0.000 |
| Creatinine Measurement        | PRScs     | auto              | 0.037 | 0.166 | 0.180 | 0.216 | NA | NA | 0.000 |
| Diastolic Blood Pressure      | P_T       | X0.5p_0.2r2       | 0.024 | 0.153 | 0.136 | 0.173 | NA | NA | 0.000 |
| Diastolic Blood Pressure      | LDpred2   | p.0.018_h2.1_F    | 0.037 | 0.190 | 0.170 | 0.213 | NA | NA | 0.000 |
| Diastolic Blood Pressure      | Lassosum2 | s.1_nl.3          | 0.029 | 0.168 | 0.152 | 0.186 | NA | NA | 0.000 |
| Diastolic Blood Pressure      | SBayesR   | default           | 0.006 | 0.079 | 0.071 | 0.087 | NA | NA | 0.014 |
